# Supplementary material for: Ce-catalyzed regioselective synthesis of pyrazoles from 1,2-diols via tandem oxidation and C–C/C–N bond formation
Source: Royal Society of Chemistry journal article supplement (doi:10.1039/d2ob01996e), 2022-11-22

**Ce-Catalyzed Regioselective Synthesis of Pyrazoles from 1,2-Diols  
via Tandem Oxidation and C-C/C-N Bond Formation**

Chandan Kumar Pal and Ashis Kumar Jena\*

Department of Chemistry, Maharaja Sriram Chandra Bhanja Deo University (Erstwhile North Orissa University), Baripada – 757 003, Odisha, India, Email: [jenaashis016@gmail.com](mailto:jenaashis016@gmail.com)

**Supporting Information**

**Contents**

|                                                                         |            |
|-------------------------------------------------------------------------|------------|
| <b>1. General information.....</b>                                      | <b>S2</b>  |
| <b>2. General procedure for synthesis of hydrazone derivatives.....</b> | <b>S2</b>  |
| <b>3. Competition experiment.....</b>                                   | <b>S2</b>  |
| <b>4. General procedure for synthesis of pyrazoles.....</b>             | <b>S3</b>  |
| <b>5. Characterization data.....</b>                                    | <b>S3</b>  |
| <b>6. References.....</b>                                               | <b>S14</b> |
| <b>7. Copies of <sup>1</sup>H and <sup>13</sup>C NMR spectra.....</b>   | <b>S16</b> |
| <b>8. Copies of HRMS spectra of novel compounds.....</b>                | <b>S88</b> |

## General information

All reactions are carried out in oven dried round bottom flask under oxygen atmosphere with oxygen balloon. Commercially available chemicals of reagents grade are used throughout the work without any further purification. All chemicals were purchased from Sigma Aldrich, Spectrochem. Pvt. Ltd., Avra and SRL chemicals, India. TLC plates (Aluminium Sheet Silica gel 60 F 254) were purchased from Merck and were visualized under a UV lamp. Solvents are evaporated *in vacuo* using Buchi R-100 Rotavapor (equipped with I-100 Pro Interface, B-100 heating bath and F-100 recirculating chiller). IR spectra were recorded using Shimadzu IR Affinity1 spectrophotometer. All NMR spectra were performed on Bruker Avance 400 MHz spectrometer in CDCl<sub>3</sub> using TMS as internal standard. Coupling constants are reported in hertz (Hz). Melting points are uncorrected.

## General procedure for synthesis of hydrazone derivatives<sup>1-6</sup>

Following the reported methods, aryl aldehydes were added to a solution of arylhydrazines in ethanol and if required few drops of acetic acid were added. After stirring, diarylhydrazone derivatives **1a-1ab** were formed, separated by vacuum filtration and if necessary purified by crystallization.

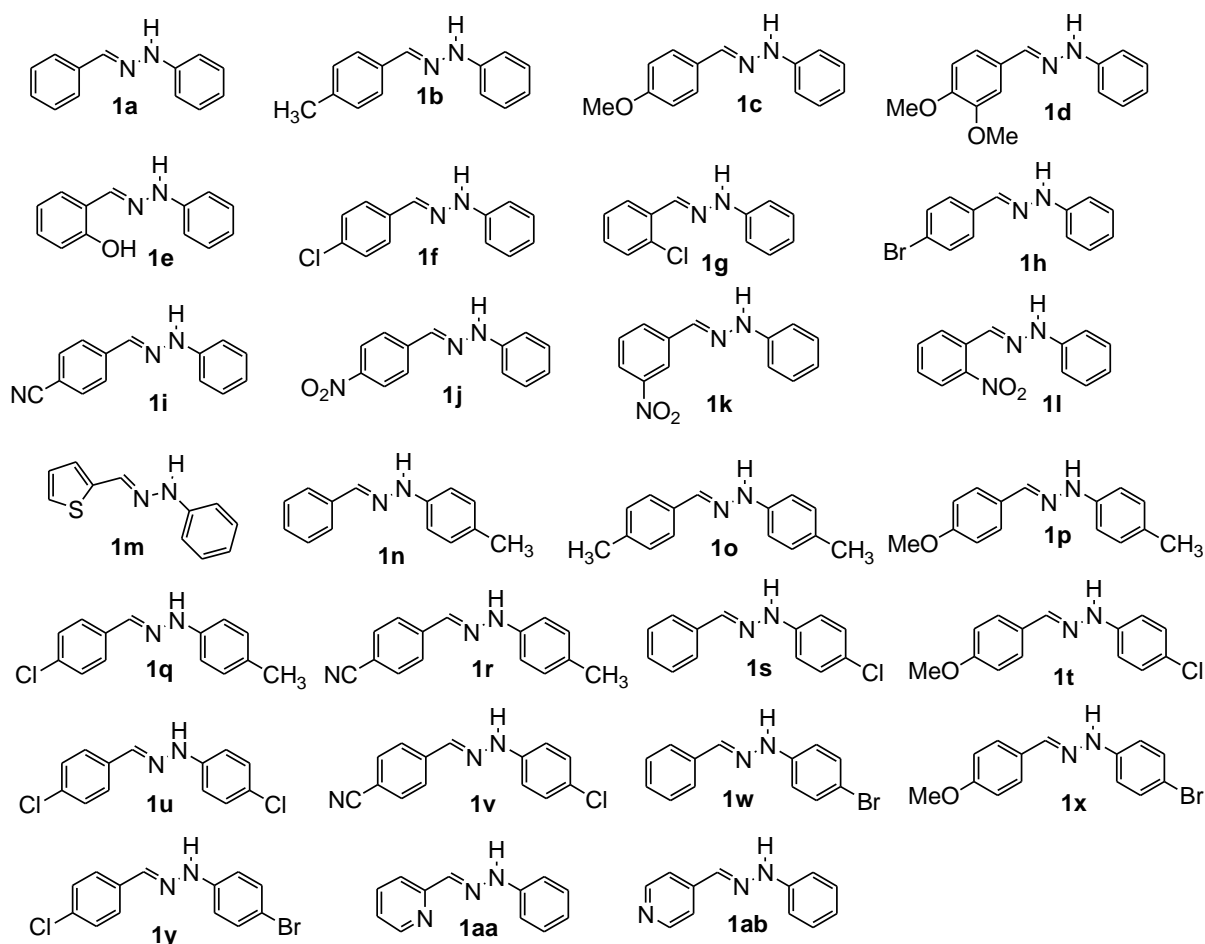

**Table 1: Competition experiment**

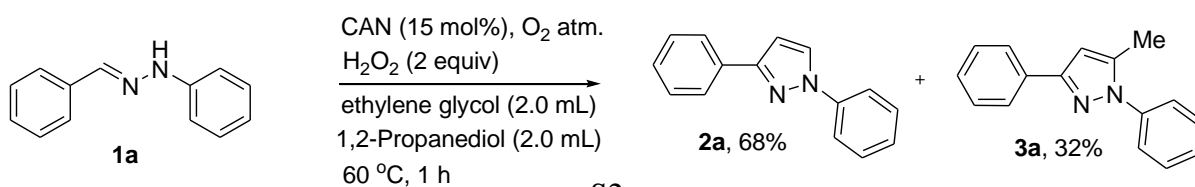

## General procedure for the synthesis pyrazoles

To a 50 mL one neck RB, hydrazone derivative **1** (0.51 mmol) was dissolved in diol (3 mL) at rt. To the above mixture, CAN (15 mol %) and 50% aqueous H<sub>2</sub>O<sub>2</sub> (1.02 mmol) were added sequentially. The resulting solution was stirred for appropriate temperature (60-80 °C) in a pre-heated oil bath under O<sub>2</sub> atmosphere. Progress of the reaction was monitored by thin layer chromatography. After completion of the reaction, the crude reaction mixture was extracted with DCM (3 x 30 mL). The organic phase was washed with water, dried over anhy. Na<sub>2</sub>SO<sub>4</sub> and filtered. The solvent was removed in vacuo by rotary vacuum evaporator and the crude mixture was purified over silica gel column chromatography using petroleum ether and ethyl acetate as eluent.

## Characterization data

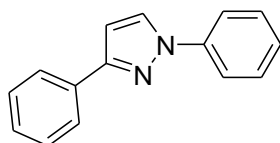

**1,3-Diphenyl-1H-pyrazole (2a).**<sup>7</sup> Following general procedure, hydrazone **1a** (100 mg, 0.51 mmol) was mixed with ethylene glycol and stirred for 0.7 h to afford the corresponding 1,3-diphenyl-1H-pyrazole **2a** (92 mg, 82% yield) as a white crystalline solid. M.P.: 81-82 °C. IR (KBr): 1598, 1524, 1504, 1455, 1362 cm<sup>-1</sup>. <sup>1</sup>H NMR (400 MHz, CDCl<sub>3</sub>): δ 7.98-7.94 (m, 3H), 7.83-7.80 (m, 2H), 7.53-7.44 (m, 4H), 7.40-7.30 (m, 2H), 6.80 (d, 1H, *J* = 2.0 Hz). <sup>13</sup>C NMR (100 MHz, CDCl<sub>3</sub>): δ 152.9, 140.2, 133.1, 129.4, 128.6, 128.0, 128.0, 126.3, 125.8, 119.0, 105.0. Anal.Calcd.for C<sub>15</sub>H<sub>12</sub>N<sub>2</sub>: C, 81.79; H, 5.49; N, 12.72; Found: C, 81.68; H, 5.47; N, 12.81.

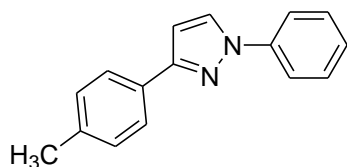

**1-Phenyl-3-p-tolyl-1H-pyrazole (2b).**<sup>8</sup> Following general procedure hydrazone **1b** (107 mg, 0.51 mmol) was mixed with ethylene glycol and stirred for 2 h to afford the corresponding 1-Phenyl-3-p-tolyl-1H-pyrazole **2b** (83 mg, 70% yield) as a white crystalline solid. M.P.: 77-78 °C. IR (KBr): 3035, 2926, 1599, 1510, 1445, 1387 cm<sup>-1</sup>. <sup>1</sup>H NMR (400 MHz, CDCl<sub>3</sub>): δ 7.96 (d, 1H, *J* = 2.4 Hz), 7.85-7.79 (m, 4H), 7.49 (t, 2H, *J* = 7.6 Hz), 7.33-7.26 (m, 3H), 6.77 (d, 1H, *J* = 1.6 Hz), 2.42 (s, 3H). <sup>13</sup>C NMR (100 MHz, CDCl<sub>3</sub>): δ 153.0, 140.2, 137.8, 130.3, 129.4, 129.3, 127.9, 126.2, 125.7, 119.0, 104.8, 21.3. Anal.Calcd.for C<sub>16</sub>H<sub>14</sub>N<sub>2</sub>: C, 82.02; H, 6.02; N, 11.96; Found: C, 82.09; H, 6.05; N, 11.98.

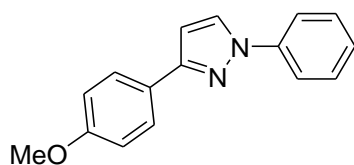

**3-(4-Methoxyphenyl)-1-phenyl-1H-pyrazole (2c).**<sup>9</sup> Following general procedure hydrazine **1c** (115 mg, 0.51 mmol) was mixed with ethylene glycol and stirred for 0.5 h to afford the corresponding 3-(4-Methoxyphenyl)-1-phenyl-1H-pyrazole **2c** (82 mg, 64% yield) as a white

crystalline solid. M.P.: 102-104 °C. IR (KBr): 3142, 3058, 2959, 1595, 1510, 1453 cm<sup>-1</sup>. <sup>1</sup>H NMR (400 MHz, CDCl<sub>3</sub>): δ 7.95 (d, 1H, *J* = 2.8 Hz), 7.90-7.84 (m, 2H), 7.80-7.76 (m, 2H), 7.48 (t, 2H, *J* = 7.6 Hz), 7.31 (d, 1H, *J* = 7.6 Hz), 7.00-6.98 (m, 2H), 6.73 (d, 1H, *J* = 2.8 Hz), 3.88 (s, 3H). <sup>13</sup>C NMR (100 MHz, CDCl<sub>3</sub>): δ 159.6, 152.8, 140.2, 129.3, 127.8, 127.1, 126.1, 125.9, 118.9, 114.0, 104.5, 55.3. Anal.Calcd.for C<sub>16</sub>H<sub>14</sub>N<sub>2</sub>O: C, 76.78; H, 5.64; N, 11.19; Found: C, 76.81; H, 5.65; N, 11.22.

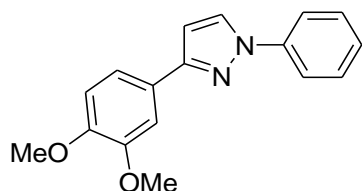

**3-(3,4-Dimethoxyphenyl)-1-phenyl-1H-pyrazole (2d).** Following general procedure hydrazone **1d** (131 mg, 0.51 mmol) was mixed with ethylene glycol and stirred for 0.7 h to afford the corresponding 3-(3,4-dimethoxyphenyl)-1-phenyl-1H-pyrazole **2d** (103 mg, 72% yield) as a yellow solid. M.P.: 98-100 °C. <sup>1</sup>H NMR (400 MHz, CDCl<sub>3</sub>): δ 7.96 (d, 1H, *J* = 2.4 Hz), 7.80 (d, 2H, *J* = 1.2 Hz), 7.56-7.40 (m, 4H), 7.33-7.29 (m, 1H), 6.95 (d, 1H, *J* = 8.4 Hz), 6.74 (d, 1H, *J* = 2.8 Hz), 4.01 (s, 3H), 3.95 (s, 3H). <sup>13</sup>C NMR (100 MHz, CDCl<sub>3</sub>): δ 152.8, 149.1, 149.1, 140.2, 129.4, 128.0, 126.2, 126.1, 119.0, 118.5, 111.1, 108.7, 104.7, 55.9, 55.9. HRMS (ESI) *m/z* [M + H]<sup>+</sup> calcd for C<sub>17</sub>H<sub>16</sub>N<sub>2</sub>O<sub>2</sub> 281.1290, found 281.1300. Anal.Calcd.for C<sub>17</sub>H<sub>16</sub>N<sub>2</sub>O<sub>2</sub>: C, 72.84; H, 5.75; N, 9.99; Found: C, 72.89; H, 5.72; N, 9.95.

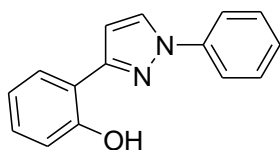

**2-(1-Phenyl-1H-pyrazol-3-yl) phenol (2e).**<sup>10</sup> Following general procedure hydrazone **1e** (108 mg, 0.51 mmol) was mixed with ethylene glycol and stirred for 0.5 h to afford the corresponding 2-(1-Phenyl-1H-pyrazol-3-yl) phenol **2e** (73 mg, 61% yield) as a white crystalline solid. M.P.: 102 °C. IR (KBr): 3142, 3051, 2952, 2921, 2854, 1620, 1598, 1522, 1507, 1450 cm<sup>-1</sup>. <sup>1</sup>H NMR (400 MHz, CDCl<sub>3</sub>): δ 10.84 (s, 1H), 8.00 (d, 1H, *J* = 2.8 Hz), 7.72 (d, 2H, *J* = 1.2 Hz), 7.70 (d, 1H, *J* = 0.8), 7.66-7.49 (m, 2H), 7.35 (t, 1H, *J* = 7.2), 7.30 (d, 1H, *J* = 1.6Hz), 7.28-7.26 (m, 1H), 7.10- 7.08 (m, 1H), 6.99-6.95 (m, 1H). <sup>13</sup>C NMR (100 MHz, CDCl<sub>3</sub>): δ 156.0, 152.9, 139.3, 129.6, 127.7, 126.8, 126.5, 119.3, 118.8, 117.2, 116.2, 104.5. Anal.Calcd.for C<sub>15</sub>H<sub>12</sub>N<sub>2</sub>O: C, 76.25; H, 5.12; N, 11.86; Found: C, 76.28; H, 5.14; N, 11.83.

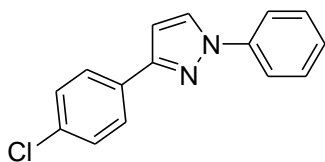

**3-(4-Chlorophenyl)-1-phenyl-1H-pyrazole (2f).**<sup>9</sup> Following general procedure hydrazone **1f** (118 mg, 0.51 mmol) was mixed with ethylene glycol and stirred for 1.5 h to afford the corresponding 3-(4-Chlorophenyl)-1-phenyl-1H-pyrazole **2f** (86 mg, 66% yield) as a white crystalline solid. M.P.: 117-118 °C. IR (KBr): 3052, 2924, 1595, 1440, 1412 cm<sup>-1</sup>. <sup>1</sup>H NMR (400 MHz, CDCl<sub>3</sub>): δ 7.97 (d, 1H, *J* = 2.8 Hz), 7.90-7.84 (m, 2H), 7.80-7.76 (m, 2H), 7.52-

7.46 (m, 2H), 7.44-7.40 (m, 2H), 7.34-7.32 (m, 1H), 6.77 (d, 1H,  $J = 2.4$  Hz).  $^{13}\text{C}$  NMR (100 MHz,  $\text{CDCl}_3$ ):  $\delta$  151.8, 140.1, 133.7, 131.6, 129.4, 128.8, 128.1, 127.0, 126.5, 119.1, 104.9. Anal. Calcd. for  $\text{C}_{15}\text{H}_{11}\text{ClN}_2$ : C, 70.73; H, 4.35; N, 11.00; Found: C, 70.81; H, 4.38; N, 10.98.

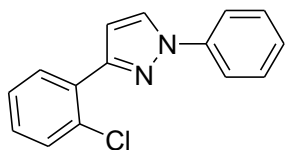

**3-(2-chlorophenyl)-1-phenyl-1H-pyrazole (2g).**<sup>7</sup> Following general procedure hydrazone **1g** (118 mg, 0.51 mmol) was mixed with ethylene glycol and stirred for 1 h to afford the corresponding 3-(2-chlorophenyl)-1-phenyl-1H-pyrazole **2g** (75 mg, 58% yield) as a white crystalline solid. M.P.: 134-136 °C. IR (KBr): 3051, 1598, 1502, 1448, 1385  $\text{cm}^{-1}$ .  $^1\text{H}$  NMR (400 MHz,  $\text{CDCl}_3$ ):  $\delta$  8.01 (d, 1H,  $J = 2.8$  Hz), 7.97 (d, 1H,  $J = 7.2$  Hz), 7.80 (d, 2H,  $J = 8.4$  Hz), 7.41-7.47 (m, 3H), 7.38-7.28 (m, 3H), 7.03 (d, 1H,  $J = 2.4$  Hz).  $^{13}\text{C}$  NMR (100 MHz,  $\text{CDCl}_3$ ):  $\delta$  150.6, 140.0, 132.4, 132.1, 130.7, 130.3, 129.4, 129.0, 127.1, 126.9, 126.5, 119.2, 109.0. Anal. Calcd. for  $\text{C}_{15}\text{H}_{11}\text{ClN}_2$ : C, 70.73; H, 4.35; N, 11.00; Found: C, 70.78; H, 4.37; N, 11.04.

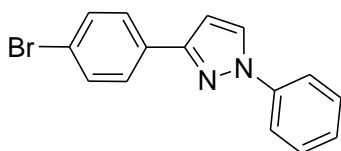

**3-(4-Bromophenyl)-1-phenyl-1H-pyrazole (2h).**<sup>9</sup> Following general procedure hydrazone **1h** (140 mg, 0.51 mmol) was mixed with ethylene glycol and stirred for 2 h to afford the corresponding 3-(4-bromophenyl)-1-phenyl-1H-pyrazole **2h** (107 mg, 70% yield) as a white crystalline solid. M.P.: 122-124 °C.  $^1\text{H}$  NMR (400 MHz,  $\text{CDCl}_3$ ):  $\delta$  7.97 (d, 1H,  $J = 2.4$  Hz), 7.84-7.76 (m, 4H), 7.58-7.56 (m, 2H), 7.49 (t, 2H,  $J = 8.0$  Hz), 7.32 (t, 1H,  $J = 7.2$  Hz), 6.77 (d, 1H,  $J = 2.4$  Hz).  $^{13}\text{C}$  NMR (100 MHz,  $\text{CDCl}_3$ ):  $\delta$  151.8, 140.1, 132.1, 131.7, 129.4, 128.2, 127.3, 126.5, 121.9, 119.1, 104.9. Anal. Calcd. for  $\text{C}_{15}\text{H}_{11}\text{BrN}_2$ : C, 60.22; H, 3.71; N, 9.36; Found: C, 60.12; H, 3.68; N, 9.41.

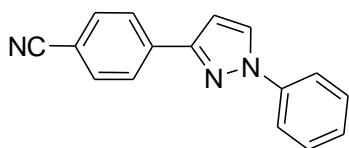

**4-(1-Phenyl-1H-pyrazol-3-yl)benzotrile (2i).** Following general procedure hydrazone **1i** (113 mg, 0.51 mmol) was mixed with ethylene glycol and stirred for 3 h to afford the corresponding 4-(1-Phenyl-1H-pyrazol-3-yl)benzotrile **2i** (106 mg, 85% yield) as a white crystalline solid. M.P.: 155-157 °C. IR (KBr): 3120, 3062, 3045, 2919, 2852, 2226, 1605, 1557, 1505, 1450  $\text{cm}^{-1}$ .  $^1\text{H}$  NMR (400 MHz,  $\text{CDCl}_3$ ):  $\delta$  8.06-8.00 (m, 3H), 7.79 (d, 2H,  $J = 8.00$  Hz), 7.72 (d, 2H,  $J = 8.4$  Hz), 7.54-7.48 (m, 2H), 7.35 (t, 1H,  $J = 7.2$  Hz), 6.84 (d, 1H,  $J = 2.4$  Hz).  $^{13}\text{C}$  NMR (100 MHz,  $\text{CDCl}_3$ ):  $\delta$  150.8, 139.8, 137.4, 132.5, 129.5, 128.5, 126.9, 126.1, 119.2, 119.1, 111.1, 105.6. HRMS (ESI)  $m/z$   $[\text{M} + \text{H}]^+$  calcd for  $\text{C}_{16}\text{H}_{11}\text{N}_3$  246.1031, found 246.1022. MS (ESI):  $m/z$  (relative intensity) 246 ( $[\text{M} + \text{H}]^+$ , 100).

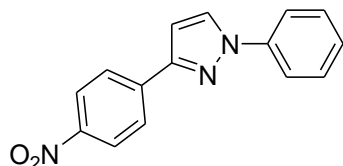

**3-(4-Nitrophenyl)-1-phenyl-1H-pyrazole (2j).**<sup>11</sup> Following general procedure hydrazone **1j** (123 mg, 0.51mmol) was mixed with ethylene glycol and stirred for 3 h to afford the corresponding 3-(4-Nitrophenyl)-1-phenyl-1H-pyrazole **2j** (84 mg, 62% yield) as a yellow crystalline solid. M.P.: 139-140 °C. IR (KBr): 1597, 1556, 1506, 1456, 1419, 1335 cm<sup>-1</sup>. <sup>1</sup>H NMR (400 MHz, CDCl<sub>3</sub>): δ 8.32 (d, 2H, *J* = 8.8 Hz), 8.10 (d, 2H, *J* = 8.8 Hz), 8.04 (d, 1H, *J* = 2.4 Hz), 7.80 (d, 2H, *J* = 7.6 Hz), 7.52 (t, 2H, *J* = 8.0 Hz), 7.40-7.34 (m, 1H), 6.90 (d, 1H, *J* = 2.4 Hz). <sup>13</sup>C NMR (100 MHz, CDCl<sub>3</sub>): δ 150.5, 147.3, 139.8, 139.4, 129.5, 128.6, 127.0, 126.2, 124.1, 119.2, 105.9. Anal.Calcd.for C<sub>15</sub>H<sub>11</sub>N<sub>3</sub>O<sub>2</sub>: C, 67.92; H, 4.18; N, 15.84; Found: C, 67.86; H, 4.22; N, 15.87

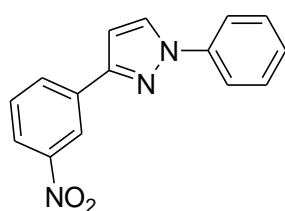

**3-(3-Nitrophenyl)-1-phenyl-1H-pyrazole (2k).**<sup>11</sup> Following general procedure hydrazone **1k** (123 mg, 0.51 mmol) was mixed with ethylene glycol and stirred for 1.5 h to afford the corresponding 3-(3-nitrophenyl)-1-phenyl-1H-pyrazole **2k** (68 mg, 50% yield) as a yellow crystalline solid. M.P.: 110-111 °C. IR (KBr): 1596, 1518, 1455, 1345 cm<sup>-1</sup>. <sup>1</sup>H NMR (400 MHz, CDCl<sub>3</sub>): δ 8.76 (d, 1H, *J* = 1.6 Hz), 8.30-8.18 (m, 2H), 8.03 (m, 1H, *J* = 2.4 Hz), 7.84-7.80 (m, 2H), 7.64-7.50 (m, 3H), 7.38-7.34 (m, 1H), 6.88 (d, 1H, *J* = 2.8 Hz). <sup>13</sup>C NMR (100 MHz, CDCl<sub>3</sub>): δ 150.5, 148.7, 139.9, 134.9, 131.5, 129.6, 129.5, 128.5, 126.8, 122.5, 120.6, 119.1, 105.3. Anal.Calcd.for C<sub>15</sub>H<sub>11</sub>N<sub>3</sub>O<sub>2</sub>: C, 67.92; H, 4.18; N, 15.84; Found: C, 67.88; H, 4.20; N, 15.81.

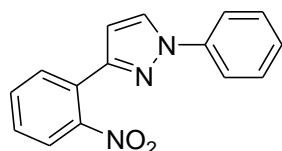

**3-(2-Nitrophenyl)-1-phenyl-1H-pyrazole (2l).**<sup>11</sup> Following general procedure hydrazone **2l** (123 mg, 0.51 mmol) was mixed with ethylene glycol and stirred for 3 h to afford the corresponding 3-(2-Nitrophenyl)-1-phenyl-1H-pyrazole **2l** (73 mg, 54 % yield) as a yellowish crystalline solid. M.P.: 80-82 °C. IR (KBr): 1599, 1503, 1342, 1271 cm<sup>-1</sup>. <sup>1</sup>H NMR (400 MHz, CDCl<sub>3</sub>): δ 7.99 (d, 1H, *J* = 2.4 Hz), 7.87-7.85 (m, 1H), 7.78-7.73 (m, 3H), 7.65-7.61 (m, 1H), 7.52-7.46 (m, 3H), 7.34-7.28 (m, 1H), 6.64 (d, 1H, *J* = 2.4Hz). <sup>13</sup>C NMR (100 MHz, CDCl<sub>3</sub>): δ 149.2, 148.2, 139.8, 131.8, 130.8, 129.4, 128.6, 127.9, 127.1, 126.7, 123.6, 119.1, 107.0. Anal.Calcd.for C<sub>15</sub>H<sub>11</sub>N<sub>3</sub>O<sub>2</sub>: C, 67.92; H, 4.18; N, 15.84; Found: C, 67.82; H, 4.17; N, 15.89

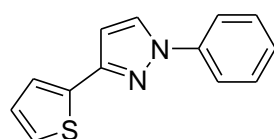

**1-Phenyl-3-(thiophen-2-yl)-1H-pyrazole (2m).**<sup>7</sup> Following general procedure hydrazone **1m** (103 mg, 0.51 mmol) was mixed with ethylene glycol and stirred for 3 h to afford the corresponding 1-Phenyl-3-(thiophen-2-yl)-1H-pyrazole **2m** (29 mg, 25% yield) as a white crystalline solid. M.P.: 65-66 °C. IR (KBr): 3067, 2921, 1598, 1558, 1506, 1461, 1374 cm<sup>-1</sup>. <sup>1</sup>H NMR (400 MHz, CDCl<sub>3</sub>): δ 7.94 (d, 1H, *J* = 2.4 Hz), 7.82-7.74 (m, 2H), 7.52-7.42 (m, 3H), 7.34-7.29 (m, 2H), 7.14-7.08 (m, 1H), 6.70 (d, 1H, *J* = 2.4 Hz). <sup>13</sup>C NMR (100 MHz, CDCl<sub>3</sub>): δ 148.2, 139.9, 136.3, 129.4, 128.0, 127.4, 126.4, 124.9, 124.2, 119.1, 105.1. Anal.Calcd.for C<sub>13</sub>H<sub>10</sub>N<sub>2</sub>S: C, 69.00; H, 4.45; N, 12.38; S, 14.17; Found: C, 69.08; H, 4.48; N, 12.34; S, 14.21.

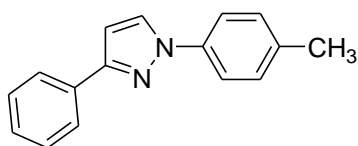

**3-Phenyl-1-p-tolyl-1H-pyrazole (2n).**<sup>7</sup> Following general procedure hydrazone **1n** (107 mg, 0.51 mmol) was mixed with ethylene glycol and stirred for 1 h to afford the corresponding 3-Phenyl-1-p-tolyl-1H-pyrazole **2n** (62 mg, 52% yield) as a white crystalline solid. M.P.: 110-112 °C. IR (KBr): 3146, 3028, 1605, 1520, 1452, 1390 cm<sup>-1</sup>. <sup>1</sup>H NMR (400 MHz, CDCl<sub>3</sub>): δ 7.96-7.93 (m, 3H), 7.67 (d, 2H, *J* = 8.4 Hz), 7.46 (t, 2H, *J* = 8.8 Hz), 7.37 (d, 1H, *J* = 7.6 Hz), 7.29 (d, 2H, *J* = 7.6 Hz), 6.78 (d, 1H, *J* = 2.4 Hz), 2.4 (s, 3H). <sup>13</sup>C NMR (100 MHz, CDCl<sub>3</sub>): δ 152.6, 138.0, 136.1, 133.2, 129.9, 128.6, 127.9, 127.9, 125.8, 119.0, 104.7, 20.9. Anal.Calcd.for C<sub>16</sub>H<sub>14</sub>N<sub>2</sub>: C, 82.02; H, 6.02; N, 11.96; Found: C, 82.08; H, 6.05; N, 11.99

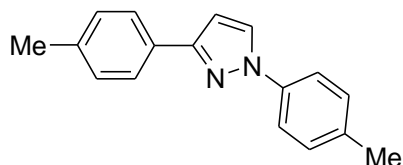

**1,3-Di(4-tolyl)-1H-pyrazol (2o).**<sup>8</sup> Following general procedure hydrazone **1o** (114 mg, 0.51 mmol) was mixed with ethylene glycol and stirred for 1 h to afford the corresponding 1,3-di(4-tolyl)-1H-pyrazol **2o** (53 mg, 42% yield) as a white crystalline solid. M.P.: 137-138 °C. IR (KBr): 2918, 2840, 1557, 1501, 1456, 1396 cm<sup>-1</sup>. <sup>1</sup>H NMR (400 MHz, CDCl<sub>3</sub>): δ 7.92 (d, 1H, *J* = 2.0 Hz), 7.83 (d, 1H, *J* = 8.0 Hz), 7.66 (d, 2H, *J* = 8.0 Hz), 7.30-7.24 (m, 4H), 6.75 (d, 1H, *J* = 2.0 Hz), 2.41 (s, 6H). <sup>13</sup>C NMR (100 MHz, CDCl<sub>3</sub>): δ 152.7, 138.0, 137.7, 136.0, 130.4, 129.9, 129.3, 127.8, 125.7, 119.0, 104.5, 21.3, 20.9. Anal.Calcd.for C<sub>17</sub>H<sub>16</sub>N<sub>2</sub>: C, 82.22; H, 6.49; N, 11.28; Found: C, 82.28; H, 6.47; N, 11.25. MS (ESI): *m/z* (relative intensity) 249 ([M + H]<sup>+</sup>, 100).

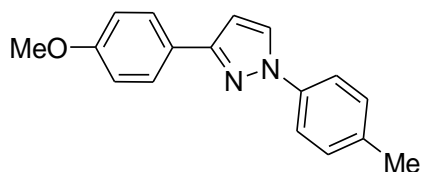

**3-(4-Methoxyphenyl)-1-(4-tolyl)-1H-pyrazole (2p).**<sup>8</sup> Following general procedure hydrazone **1p** (122 mg, 0.51 mmol) was mixed with ethylene glycol and stirred for 2 h to

afford the corresponding 3-(4-methoxyphenyl)-1-(4-tolyl)-1*H*-pyrazole **2p** (73 mg, 54% yield) as a white crystalline solid. M.P.: 157-158 °C. IR (KBr): 3073, 2907, 2865, 1597, 1558, 1504, 1443 cm<sup>-1</sup>. <sup>1</sup>H NMR (400 MHz, CDCl<sub>3</sub>): δ 7.89 (d, 1H, *J* = 2.5 Hz), 7.84 (d, 2H, *J* = 8.8 Hz), 7.65 (d, 2H, *J* = 8.5 Hz), 7.26 (d, 2H, *J* = 8.2 Hz), 6.98 (d, 2H, *J* = 8.8 Hz), 6.68 (d, 1H, *J* = 2.5 Hz), 3.86 (s, 3H), 2.41 (s, 3H). <sup>13</sup>C NMR (100 MHz, CDCl<sub>3</sub>): δ 159.5, 152.5, 138.0, 135.9, 129.9, 127.8, 127.0, 126.0, 118.9, 114.0, 104.2, 55.3, 20.9. Anal. Calcd. for C<sub>17</sub>H<sub>16</sub>N<sub>2</sub>O: C, 77.25; H, 6.10; N, 10.60; Found: C, 77.32; H, 6.12; N, 10.63

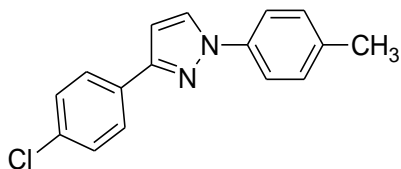

**3-(4-Chlorophenyl)-1-p-tolyl-1*H*-pyrazole (2q).** Following general procedure hydrazone **1q** (125 mg, 0.51 mmol) was mixed with ethylene glycol and stirred for 1.5 h to afford the corresponding 3-(4-Chlorophenyl)-1-p-tolyl-1*H*-pyrazole **2q** (33 mg, 24% yield) as a white crystalline solid. <sup>1</sup>H NMR (400 MHz, CDCl<sub>3</sub>): δ 7.93 (d, 1H, *J* = 2.4 Hz), 7.90-7.84 (m, 2H), 7.65 (d, 2H, *J* = 8.4 Hz), 7.44-7.40 (m, 2H), 7.29 (d, 2H, *J* = 6.4 Hz), 6.75 (d, 1H, *J* = 2.4 Hz), 2.42 (s, 3H). <sup>13</sup>C NMR (100 MHz, CDCl<sub>3</sub>): δ 151.5, 137.8, 136.3, 133.6, 131.7, 129.9, 128.8, 128.1, 127.0, 119.0, 104.7, 20.9. Anal. Calcd. for C<sub>16</sub>H<sub>13</sub>ClN<sub>2</sub>: C, 71.51; H, 4.88; N, 10.42; Found: C, 71.45; H, 4.92; N, 10.48. MS (ESI): *m/z* (relative intensity) 268 ([M]<sup>+</sup>, 100).

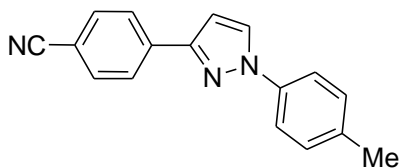

**4-(1-p-tolyl-1*H*-pyrazol-3-yl) benzonitrile (2r).** Following general procedure hydrazone **1r** (120 mg, 0.51 mmol) was mixed with ethylene glycol and stirred for 1 h to afford the corresponding 4-(1-p-tolyl-1*H*-pyrazol-3-yl) benzonitrile **2r** (108 mg, 82% yield) as a white crystalline solid. M.P.: 133-135 °C. <sup>1</sup>H NMR (400 MHz, CDCl<sub>3</sub>): δ 8.02 (d, 2H, *J* = 8.0 Hz), 7.96 (d, 1H, *J* = 2.0 Hz), 7.71 (d, 2H, *J* = 8.0 Hz), 7.65 (d, 2H, *J* = 8.0 Hz), 7.30 (d, 2H, *J* = 8.4 Hz), 6.82 (d, 1H, *J* = 2.4 Hz), 2.42 (s, 3H). <sup>13</sup>C NMR (100 MHz, CDCl<sub>3</sub>): δ 150.5, 137.6, 137.6, 136.8, 132.5, 130.0, 128.5, 126.1, 119.1, 119.1, 111.0, 105.3, 21.0. HRMS (ESI) *m/z* [M + H]<sup>+</sup> calcd for C<sub>17</sub>H<sub>13</sub>N<sub>3</sub> 260.1187, found 260.1178. MS (ESI): *m/z* (relative intensity) 260 ([M + H]<sup>+</sup>, 100).

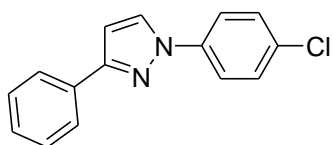

**1-(4-Chlorophenyl)-3-phenyl-1*H*-pyrazole (2s).**<sup>7</sup> Following general procedure hydrazone **1s** (118 mg, 0.51 mmol) was mixed with ethylene glycol and stirred for 1 h to afford the corresponding, 1-(4-Chlorophenyl)-3-phenyl-1*H*-pyrazole **2s** (78 mg, 60% yield) as a white crystalline solid. M.P.: 131-133 °C. IR (KBr): 3060, 1595, 1531, 1504, 1492, 1450 cm<sup>-1</sup>. <sup>1</sup>H



NMR (400 MHz, CDCl<sub>3</sub>):  $\delta$  7.93 (t, 3H,  $J$  = 2.4 Hz), 7.76-7.72 (m, 2H), 7.48-7.44 (m, 2H), 7.40-7.34 (m, 3H), 6.81 (d, 1H,  $J$  = 2.8 Hz). <sup>13</sup>C NMR (100 MHz, CDCl<sub>3</sub>):  $\delta$  153.2, 138.7, 132.8, 131.7, 129.5, 128.7, 128.2, 127.90, 125.8, 120.1, 105.4. Anal. Calcd. for C<sub>15</sub>H<sub>11</sub>ClN<sub>2</sub>: C, 70.73; H, 4.35; N, 11.00; Found: C, 70.83; H, 4.41; N, 11.04.

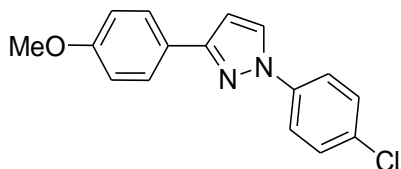

**1-(4-Chlorophenyl)-3-(4-methoxyphenyl)-1H-pyrazole (2t).**<sup>12</sup> Following general procedure hydrazone **1t** (133 mg, 0.51 mmol) was mixed with ethylene glycol and stirred for 1 h to afford the corresponding 1-(4-Chlorophenyl)-3-(4-methoxyphenyl)-1H-pyrazole **2t** (65 mg, 45% yield) as a white crystalline solid. M.P.: 148-150 °C. <sup>1</sup>H NMR (400 MHz, CDCl<sub>3</sub>):  $\delta$  7.91 (d, 1H,  $J$  = 2.0 Hz), 7.85 (d, 2H,  $J$  = 8.4 Hz), 7.72 (d, 2H,  $J$  = 8.8 Hz), 7.44 (d, 2H,  $J$  = 8.8 Hz), 6.99 (d, 2H,  $J$  = 8.8 Hz), 6.73 (d, 1H,  $J$  = 2.4 Hz), 3.87 (s, 3H). <sup>13</sup>C NMR (100 MHz, CDCl<sub>3</sub>):  $\delta$  159.7, 153.0, 138.7, 131.5, 129.4, 127.8, 127.1, 125.6, 119.9, 114.1, 104.9, 55.3. Anal. Calcd. for C<sub>16</sub>H<sub>13</sub>ClN<sub>2</sub>O: C, 67.49; H, 4.60; N, 9.84; Found: C, 67.52; H, 4.62; N, 9.88.

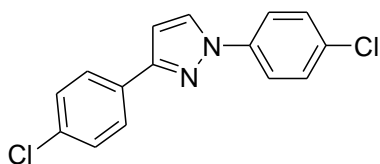

**1,3-Bis(4-chlorophenyl)-1H-pyrazole (2u).**<sup>7</sup> Following general procedure hydrazone **1u** (135 mg, 0.51 mmol) was mixed with ethylene glycol and stirred for 1 h to afford the corresponding 1,3-Bis(4-chlorophenyl)-1H-pyrazole **2u** (106 mg, 72% yield) as a white crystalline solid. M.P.: 135-136 °C. IR (KBr): 3144, 3047, 1595, 1564, 1501, 1442, 1420 cm<sup>-1</sup>. <sup>1</sup>H NMR (400 MHz, CDCl<sub>3</sub>):  $\delta$  7.93 (t, 1H,  $J$  = 2.4 Hz), 7.86-7.84 (m, 2H), 7.73-7.70 (m, 2H), 7.46-7.40 (m, 4H), 6.76 (t, 1H,  $J$  = 2.4 Hz). <sup>13</sup>C NMR (100 MHz, CDCl<sub>3</sub>):  $\delta$  152.0, 138.6, 133.9, 131.9, 131.3, 129.5, 128.8, 128.0, 127.0, 120.1, 105.3. Anal. Calcd. for C<sub>15</sub>H<sub>10</sub>Cl<sub>2</sub>N<sub>2</sub>: C, 62.30; H, 3.49; N, 9.69; Found: C, 62.41; H, 3.52; N, 9.73.

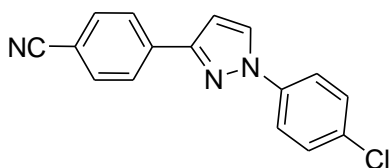

**4-(1-(4-Chlorophenyl)-1H-pyrazol-3-yl) benzonitrile (2v).** Following general procedure hydrazone **1v** (130 mg, 0.51 mmol) was mixed with ethylene glycol and stirred for 1 h to afford the corresponding 4-(1-(4-Chlorophenyl)-1H-pyrazol-3-yl) benzonitrile **2v** (117 mg, 82% yield) as a gummy mass. IR (KBr): 3149, 3057, 2914, 2857, 2235, 1651, 1611, 1561, 1510, 1450 cm<sup>-1</sup>. <sup>1</sup>H NMR (400 MHz, CDCl<sub>3</sub>):  $\delta$  8.04-7.96 (m, 3H), 7.73 (d, 4H,  $J$  = 8.0 Hz), 7.47 (d, 2H,  $J$  = 8.4 Hz), 6.85 (d, 1H,  $J$  = 0.8 Hz). <sup>13</sup>C NMR (100 MHz, CDCl<sub>3</sub>):  $\delta$  151.1, 138.4, 137.2, 132.5, 132.4, 129.6, 128.4, 126.2, 120.2, 119.0, 111.3, 105.9. HRMS (ESI)  $m/z$  [M + H]<sup>+</sup> calcd for C<sub>16</sub>H<sub>10</sub>ClN<sub>3</sub> 280.0641, found 280.0638. Anal. Calcd. for C<sub>16</sub>H<sub>10</sub>ClN<sub>3</sub>: C, 68.70; H, 3.60; N, 15.02; Found: C, 68.74; H, 3.58; N, 15.08.

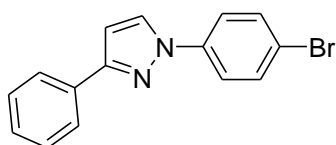

**1-(4-Bromophenyl)-3-phenyl-1H-pyrazole (2w).**<sup>9</sup> Following general procedure hydrazone **1w** (140 mg, 0.51 mmol) was mixed with ethylene glycol and stirred for 1 h to afford the corresponding 1-(4-Bromophenyl)-3-phenyl-1H-pyrazole **2w** (88 mg, 58% yield) as a white crystalline solid. M.P.: 134-136 °C. <sup>1</sup>H NMR (400 MHz, CDCl<sub>3</sub>): δ 7.94-7.92 (m, 3H), 7.70-7.67 (m, 2H), 7.62-7.59 (m, 2H), 7.48- 7.36 (m, 2H), 7.28 (s, 1H), 6.81 (d, 1H, *J* = 2.4 Hz). <sup>13</sup>C NMR (100 MHz, CDCl<sub>3</sub>): δ 153.2, 139.2, 132.8, 132.4, 128.7, 128.2, 127.8, 125.8, 120.3, 119.4, 105.4. Anal.Calcd.for C<sub>15</sub>H<sub>11</sub>BrN<sub>2</sub>: C, 60.22; H, 3.71; N, 9.36; Found: C, 60.14; H, 3.74; N, 9.43

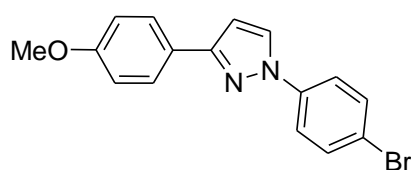

**1-(4-Bromophenyl)-3-(4-methoxyphenyl)-1H-pyrazole (2x)**<sup>13</sup>. Following general procedure hydrazone **1x** (155.4 mg, 0.51 mmol) was mixed with ethylene glycol and stirred for 2 h to afford the corresponding 1-(4-bromophenyl)-3-(4-methoxyphenyl)-1H-pyrazole **2x** (75.478 mg, 45% yield) as a white crystalline solid. M.P.: 187-188 °C. <sup>1</sup>H NMR (400 MHz, CDCl<sub>3</sub>): δ 7.91 (d, 1H, *J* = 1.2 Hz), 7.85 (d, 2H, *J* = 8.8 Hz), 7.67 (d, 2H, *J* = 8.8 Hz), 7.59 (d, 2H, *J* = 8.8 Hz), 6.99 (d, 2H, *J* = 8.4 Hz), 6.73 (d, 1H, *J* = 1.2 Hz), 3.87 (s, 3H). <sup>13</sup>C NMR (100 MHz, CDCl<sub>3</sub>): δ 159.7, 153.0, 139.2, 132.4, 127.7, 127.1, 125.6, 120.2, 119.2, 114.1, 105.0, 55.3. Anal.Calcd.for C<sub>16</sub>H<sub>13</sub>BrN<sub>2</sub>O: C, 58.38; H, 3.98; N, 8.51; Found: C, 58.47; H, 3.95; N, 8.57.

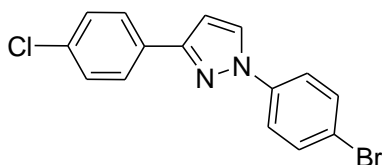

**1-(4-Bromophenyl)-3-(4-chlorophenyl)-1H-pyrazole (2y).**<sup>11</sup> Following general procedure hydrazone **1y** (158 mg, 0.51mmol) was mixed with ethylene glycol and stirred for 3 h to afford the corresponding 1-(4-bromophenyl)-3-(4-chlorophenyl)-1H-pyrazole **2y** (116 mg, 68% yield) as a white crystalline solid. M.P.: 134-135 °C. IR (KBr): 3154, 2314, 1593, 1498, 1417, 1319 cm<sup>-1</sup>. <sup>1</sup>H NMR (400 MHz, CDCl<sub>3</sub>): δ 7.94 (d, 1H, *J* = 2.4 Hz), 7.85 (d, 2H, *J* = 8.4 Hz), 7.70-7.58 (m, 4H), 7.42 (d, 2H, *J* = 8.4 Hz), 6.77 (d, 1H, *J* = 2.4 Hz). <sup>13</sup>C NMR (100 MHz, CDCl<sub>3</sub>): δ 152.1, 139.0, 133.9, 132.4, 131.3, 128.8, 128.0, 127.1, 120.4, 119.6, 105.4. Anal.Calcd.for C<sub>15</sub>H<sub>10</sub>BrClN<sub>2</sub>: C, 54.00; H, 3.02; N, 8.40; Found: C, 54.07; H, 3.06; N, 8.45.

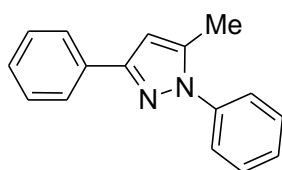

**5-Methyl-1,3-diphenyl-1H-pyrazole (3a).**<sup>7</sup> Following general procedure hydrazone **1a** (100

mg, 0.51 mmol) was mixed with 1,2-propanediol and stirred for 0.5 h to afford the corresponding, 5-Methyl-1,3-diphenyl-1*H*-pyrazole **3a** (62 mg, 52% yield) as a liquid. IR (neat): 3060, 2923, 1597, 1548, 1500, 1456  $\text{cm}^{-1}$ .  $^1\text{H}$  NMR (400 MHz,  $\text{CDCl}_3$ ):  $\delta$  7.91-7.86 (m, 2H), 7.58-7.48 (m, 4H), 7.46-7.38 (m, 3H), 7.36-7.31 (m, 1H), 6.56 (s, 1H), 2.41 (s, 3H).  $^{13}\text{C}$  NMR (100 MHz,  $\text{CDCl}_3$ ):  $\delta$  151.5, 140.1, 139.9, 133.3, 129.1, 128.5, 127.7, 127.6, 125.7, 125.0, 104.3, 12.5. Anal. Calcd. for  $\text{C}_{16}\text{H}_{14}\text{N}_2$ : C, 82.02; H, 6.02; N, 11.96; Found: C, 82.11; H, 6.05; N, 11.99.

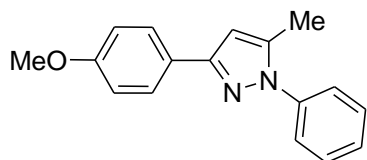

**3-(4-Methoxyphenyl)-5-methyl-1-phenyl-1*H*-pyrazole (3b).**<sup>7</sup> Following general procedure hydrazone **1c** (115 mg, 0.51 mmol) was mixed with 1,2-propanediol and stirred for 0.7 h to afford the corresponding, 3-(4-Methoxyphenyl)-5-methyl-1-phenyl-1*H*-pyrazole **3b** (74 mg, 55% yield) as a colourless solid. M.P.: 98-100  $^{\circ}\text{C}$ . IR (KBr): 3059, 2957, 1598, 1523, 1500, 1453, 1433, 1404  $\text{cm}^{-1}$ .  $^1\text{H}$  NMR (400 MHz,  $\text{CDCl}_3$ ):  $\delta$  7.82-7.80 (m, 2H), 7.56-7.46 (m, 4H), 7.43-7.38 (m, 1H), 6.98-6.94 (m, 2H), 6.48 (d, 1H,  $J = 0.8$  Hz), 3.86 (s, 3H), 2.39 (d, 3H,  $J = 0.4$  Hz).  $^{13}\text{C}$  NMR (100 MHz,  $\text{CDCl}_3$ ):  $\delta$  159.4, 151.3, 140.1, 139.9, 129.0, 127.5, 127.0, 126.0, 124.9, 113.9, 103.9, 55.3, 12.5. Anal. Calcd. for  $\text{C}_{17}\text{H}_{16}\text{N}_2\text{O}$ : C, 77.25; H, 6.10; N, 10.60; Found: C, 77.24; H, 6.13; N, 10.62.

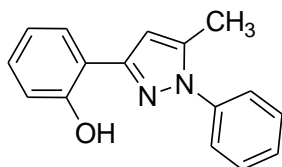

**2-(5-Methyl-1-phenyl-1*H*-pyrazol-3-yl) phenol (3c).**<sup>7</sup> Following general procedure hydrazone **1e** (108 mg, 0.51 mmol) was mixed with 1,2-propanediol and stirred for 4 h to afford the corresponding, 2-(5-Methyl-1-phenyl-1*H*-pyrazol-3-yl) phenol **3c** (38 mg, 30% yield) as a colourless liquid. IR (neat): 3132, 3102, 3055, 1618, 1597, 1548, 1500, 1458  $\text{cm}^{-1}$ .  $^1\text{H}$  NMR (400 MHz,  $\text{CDCl}_3$ ):  $\delta$  11.01 (s, 1H), 7.62-7.58 (m, 1H), 7.54-7.48 (m, 4H), 7.47-7.40 (m, 1H), 7.27-7.20 (m, 1H), 7.07-7.01 (m, 1H), 6.97-6.90 (m, 1H), 6.62 (s, 1H), 2.44 (s, 3H).  $^{13}\text{C}$  NMR (100 MHz,  $\text{CDCl}_3$ ):  $\delta$  156.1, 151.5, 139.9, 139.1, 129.2, 129.2, 127.9, 126.4, 124.6, 119.2, 117.1, 116.4, 103.8, 12.4. HRMS (ESI)  $m/z$   $[\text{M} + \text{H}]^+$  calcd for  $\text{C}_{16}\text{H}_{14}\text{N}_2\text{O}$  251.1184, found 251.1192

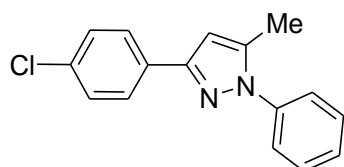

**3-(4-Chlorophenyl)-5-methyl-1-phenyl-1*H*-pyrazole (3d).**<sup>11</sup> Following general procedure hydrazine **1f** (118 mg, 0.51 mmol) was mixed with 1,2-propanediol and stirred for 1 h to afford the corresponding, 3-(4-Chlorophenyl)-5-methyl-1-phenyl-1*H*-pyrazole **3d** (78 mg, 57% yield) as a white crystalline solid. M.P.: 80-81  $^{\circ}\text{C}$ . IR (KBr): 3058, 2920, 1598, 1548, 1500, 1452, 1398  $\text{cm}^{-1}$ .  $^1\text{H}$  NMR (400 MHz,  $\text{CDCl}_3$ ):  $\delta$  7.81 (d, 2H,  $J = 8.4$  Hz), 7.54-7.50 (m, 4H), 7.42-7.36 (m, 3H), 6.52 (s, 1H), 2.40 (s, 3H).  $^{13}\text{C}$  NMR (100 MHz,  $\text{CDCl}_3$ ):  $\delta$  150.4,

140.4, 139.8, 133.4, 131.8, 129.1, 128.7, 127.8, 126.9, 125.0, 104.3, 12.5. Anal.Calcd.for C<sub>16</sub>H<sub>13</sub>ClN<sub>2</sub>: C, 71.51; H, 4.88; N, 10.42; Found: C, 71.58; H, 4.92; N, 10.47.

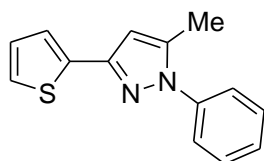

**5-Methyl-1-phenyl-3-(thiophen-2-yl)-1H-pyrazole (3e).**<sup>7</sup> Following general procedure hydrazone **1m** (103 mg, 0.51 mmol) was mixed with 1,2-propanediol and stirred for 0.7 h to afford the corresponding, 5-Methyl-1-phenyl-3-(thiophen-2-yl)-1H-pyrazole **3e** (37 mg, 30% yield) as a colourless liquid. IR (neat): 3067, 2961, 1596, 1566, 1532, 1500, 1425, 1375 cm<sup>-1</sup>. <sup>1</sup>H NMR (400 MHz, CDCl<sub>3</sub>):  $\delta$  7.56-7.46 (m, 4H), 7.44-7.36 (m, 2H), 7.27-7.24 (m, 1H), 7.10-7.04 (m, 1H), 6.46 (s, 1H), 2.38 (s, 3H). <sup>13</sup>C NMR (100 MHz, CDCl<sub>3</sub>):  $\delta$  146.8, 140.2, 139.6, 136.6, 129.1, 127.7, 127.4, 125.0, 124.5, 123.8, 104.4, 12.5. Anal.Calcd.for C<sub>14</sub>H<sub>12</sub>N<sub>2</sub>S: C, 69.97; H, 5.03; N, 11.66; S, 13.34; Found: C, 69.94; H, 5.08; N, 11.72; S, 13.37

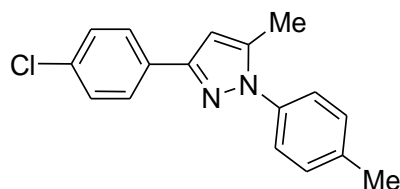

**3-(4-Chlorophenyl)-5-methyl-1-p-tolyl-1H-pyrazole (3f).** Following general procedure hydrazone **1q** (125 mg, 0.51 mmol) was mixed with 1,2-propanediol and stirred for 1 h to afford the corresponding, 3-(4-Chlorophenyl)-5-methyl-1-p-tolyl-1H-pyrazole **3f** (75 mg, 52% yield) as a gummy mass. IR (KBr): 3045, 2925, 2850, 1588, 1550, 1509, 1455, 1429, 1394 cm<sup>-1</sup>. <sup>1</sup>H NMR (400 MHz, CDCl<sub>3</sub>):  $\delta$  7.84-7.78 (m, 2H), 7.46-7.36 (m, 4H), 7.32-7.29 (m, 2H), 6.49 (d, 1H, *J* = 0.4 Hz), 2.4 (s, 3H), 2.37 (d, 3H, *J* = 0.4 Hz). <sup>13</sup>C NMR (100 MHz, CDCl<sub>3</sub>):  $\delta$  150.1, 140.4, 137.8, 137.3, 133.3, 131.9, 129.7, 128.7, 126.9, 124.9, 104.0, 21.1, 12.4. Anal.Calcd.for C<sub>17</sub>H<sub>15</sub>ClN<sub>2</sub>: C, 72.21; H, 5.35; N, 9.91; Found: C, 72.15; H, 5.32; N, 9.94. HRMS (ESI) *m/z* [M + H]<sup>+</sup> calcd for C<sub>17</sub>H<sub>15</sub>ClN<sub>2</sub> 283.1002, found 283.1003. MS (ESI): *m/z* (relative intensity) 282 ([M]<sup>+</sup>, 100).

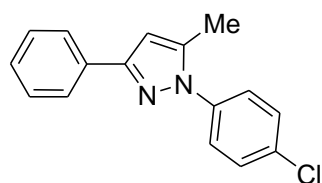

**1-(4-Chlorophenyl)-5-methyl-3-phenyl-1H-pyrazole (3g).** Following general procedure hydrazone **1s** (117 mg, 0.51 mmol) was mixed with 1,2-propanediol and stirred for 1 h to afford the corresponding, 1-(4-Chlorophenyl)-5-methyl-3-phenyl-1H-pyrazole **3g** (68 mg, 50 % yield) as a yellow oil. IR (neat): 3059, 2975, 2908, 2857, 1592, 1566, 1550, 1504 cm<sup>-1</sup>. <sup>1</sup>H NMR (400 MHz, CDCl<sub>3</sub>):  $\delta$  7.87 (d, 1H, *J* = 7.6 Hz), 7.52-7.40 (m, 6H), 7.36-7.32 (m, 1H), 6.55 (s, 1H), 2.4 (s, 3H). <sup>13</sup>C NMR (100 MHz, CDCl<sub>3</sub>):  $\delta$  151.8, 140.2, 138.4, 133.3, 133.1, 129.2, 128.6, 127.9, 126.0, 125.7, 104.8, 12.6. HRMS (ESI) *m/z* [M + H]<sup>+</sup> calcd for C<sub>16</sub>H<sub>13</sub>ClN<sub>2</sub> 269.0845, found 269.0849. MS (ESI): *m/z* (relative intensity) 268 ([M]<sup>+</sup>, 100). Anal.Calcd.for C<sub>16</sub>H<sub>13</sub>ClN<sub>2</sub>: C, 71.51; H, 4.88; N, 10.42; Found: C, 71.59; H, 4.94; N, 10.44.

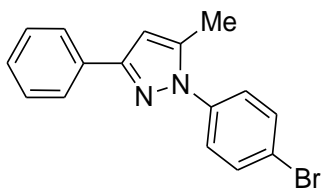

**1-(4-Bromophenyl)-5-methyl-3-phenyl-1H-pyrazole (3h).**<sup>11</sup> Following general procedure hydrazone **1w** (140 mg, 0.51 mmol) was mixed with 1,2-propanediol and stirred for **1 h** to afford the corresponding, 1-(4-Bromophenyl)-5-methyl-3-phenyl-1H-pyrazole **3h** (82 mg, 52% yield) as a gummy liquid. IR (neat): 3062, 2917, 1582, 1553, 1487, 1364  $\text{cm}^{-1}$ .  $^1\text{H}$  NMR (400 MHz,  $\text{CDCl}_3$ ):  $\delta$  7.86 (d, 2H,  $J = 7.6$  Hz), 7.63 (d, 2H,  $J = 8.4$  Hz), 7.46-7.30 (m, 5H), 6.56 (s, 1H), 2.41 (s, 3H).  $^{13}\text{C}$  NMR (100 MHz,  $\text{CDCl}_3$ ):  $\delta$  151.8, 140.2, 138.9, 133.0, 132.2, 128.6, 127.9, 126.3, 125.7, 121.2, 104.8, 12.6. Anal. Calcd. for  $\text{C}_{16}\text{H}_{13}\text{BrN}_2$ : C, 61.36; H, 4.18; N, 8.94; Found: C, 61.43; H, 4.22; N, 8.99.

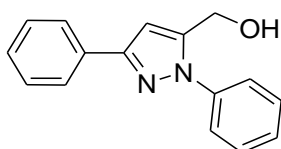

**(1,3-Diphenyl-1H-pyrazol-5-yl)methanol (3i).**<sup>14</sup> Following general procedure hydrazone **1a** (100 mg, 0.51 mmol) was mixed with glycerol and stirred for 6 h to afford the corresponding 1,3-Diphenyl-1H-pyrazol-5-yl)methanol **3i** (38 mg, 30% yield) as a green solid. M.P.: 99-100  $^\circ\text{C}$ . IR (KBr): 3299, 3069, 2878, 1590, 1501, 1369  $\text{cm}^{-1}$ .  $^1\text{H}$  NMR (400 MHz,  $\text{CDCl}_3$ ):  $\delta$  7.89 (d, 2H,  $J = 7.2$  Hz), 7.67 (d, 2H,  $J = 8.0$  Hz), 7.51 (t, 2H,  $J = 8.0$  Hz), 7.48-7.32 (m, 4H), 6.78 (s, 1H), 4.70 (s, 2H), 1.96 (s, br, 1H).  $^{13}\text{C}$  NMR (100 MHz,  $\text{CDCl}_3$ ):  $\delta$  151.7, 143.3, 139.5, 132.8, 129.2, 128.6, 128.0, 127.9, 125.7, 124.5, 104.9, 55.8. Anal. Calcd. for  $\text{C}_{16}\text{H}_{14}\text{N}_2\text{O}$ : C, 76.78; H, 5.64; N, 11.19; Found: C, 76.82; H, 5.67; N, 11.17.

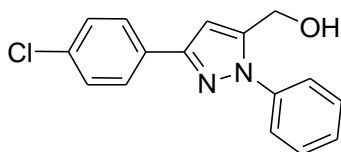

**(3-(4-Chlorophenyl)-1-phenyl-1H-pyrazol-5-yl)methanol (3j).**<sup>14</sup> Following general procedure hydrazone **1f** (117 mg, 0.51 mmol) was mixed with glycerol and stirred for 3 h to afford the corresponding (3-(4-Chlorophenyl)-1-phenyl-1H-pyrazol-5-yl)methanol **3j** (54 mg, 37% yield) as a white solid. M.P.: 91-92  $^\circ\text{C}$ .  $^1\text{H}$  NMR (400 MHz,  $\text{CDCl}_3$ ):  $\delta$  7.82 (d, 2H,  $J = 8.4$  Hz), 7.67 (d, 2H,  $J = 8.0$  Hz), 7.56-7.48 (m, 2H), 7.44-7.38 (m, 3H), 6.76 (s, 1H), 4.72 (s, 2H), 1.98 (s, br, 1H).  $^{13}\text{C}$  NMR (100 MHz,  $\text{CDCl}_3$ ):  $\delta$  150.6, 143.4, 139.4, 133.7, 131.5, 129.3, 128.8, 128.1, 127.0, 124.5, 104.8, 55.8. Anal. Calcd. for  $\text{C}_{16}\text{H}_{13}\text{ClN}_2\text{O}$ : C, 67.49; H, 4.60; N, 9.84; Found: C, 67.56; H, 4.64; N, 9.89.

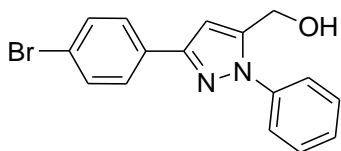

**(3-(4-Bromophenyl)-1-phenyl-1H-pyrazol-5-yl)methanol (3k).** Following general procedure hydrazone **1h** (140 mg, 0.51 mmol) was mixed with glycerol and stirred for 3 h to afford the corresponding, (3-(4-Bromophenyl)-1-phenyl-1H-pyrazol-5-yl)methanol **3k** (55 mg, 33% yield) as a gummy mass. IR (KBr): 3146, 2965, 2935, 2843, 1612, 1558, 1512, 1504, 1458  $\text{cm}^{-1}$ .  $^1\text{H}$  NMR (400 MHz,  $\text{CDCl}_3$ ):  $\delta$  7.76 (d, 2H,  $J = 8.0$  Hz), 7.66 (d, 2H,  $J = 8.0$  Hz), 7.58-7.50 (m, 4H), 7.46-7.40 (m, 1H), 6.76 (s, 1H), 4.71 (s, 2H), 1.80 (s, br, 1H).  $^{13}\text{C}$  NMR (100 MHz,  $\text{CDCl}_3$ ):  $\delta$  150.6, 143.4, 139.4, 131.9, 131.7, 129.3, 128.1, 127.3, 124.5, 121.9, 104.8, 55.8. HRMS (ESI)  $m/z$   $[\text{M} + \text{H}]^+$  calcd for  $\text{C}_{16}\text{H}_{13}\text{BrN}_2\text{O}$  329.0289, found 329.0293. MS (ESI):  $m/z$  (relative intensity) 329 ( $[\text{M}]^+$ , 100). Anal. Calcd. for  $\text{C}_{16}\text{H}_{13}\text{BrN}_2\text{O}$ : C, 58.38; H, 3.98; N, 8.51; Found: C, 58.45; H, 3.94; N, 8.56.

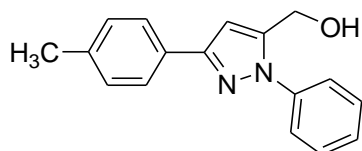

**(1-Phenyl-3-p-tolyl-1H-pyrazol-5-yl)methanol (3l).**<sup>14</sup> Following general procedure hydrazone **1b** (107 mg, 0.51 mmol) was mixed with glycerol and stirred for 3 h to afford the corresponding (1-Phenyl-3-p-tolyl-1H-pyrazol-5-yl)methanol **3l** (38 mg, 28% yield) as a white crystalline solid. M.P.: 92-93  $^{\circ}\text{C}$ .  $^1\text{H}$  NMR (400 MHz,  $\text{CDCl}_3$ ):  $\delta$  7.78 (d, 2H,  $J = 7.6$  Hz), 7.67 (d, 2H,  $J = 8.0$  Hz), 7.54-7.48 (m, 2H), 7.44-7.38 (m, 1H), 7.26-7.22 (m, 2H), 6.75 (s, 1H), 4.71 (s, 2H), 2.4 (s, 3H), 1.92 (s, br, 1H).  $^{13}\text{C}$  NMR (100 MHz,  $\text{CDCl}_3$ ):  $\delta$  151.8, 143.1, 139.5, 137.8, 130.0, 129.3, 129.2, 127.8, 125.6, 124.5, 104.7, 55.8, 21.3. Anal. Calcd. for  $\text{C}_{17}\text{H}_{16}\text{N}_2\text{O}$ : C, 77.25; H, 6.10; N, 10.60; Found: C, 77.24; H, 6.13; N, 10.62.

## References

1. X. Deng and N. S. Mani, *J. Org. Chem.*, 2008, **73**, 2412-2415.
2. Z. Chen, H. Li, W. Dong, M. Miao and H. Ren, *Org. Lett.*, 2016, **18**, 1334-1337.
3. E. Espildora, J. L. Delgado, P. D. L. Cruz, A. D. L. Hoz, V. L. Arza and F. Langa, *Tetrahedron*, 2002, **58**, 5821-5826.
4. V. G. Nenajdenko, A. V. Shastin, V. M. Gorbachev, S. V. Shorunov, V. M. Muzalevskiy, A. I. Lukianova, P. V. Dorovatovskii and V. N. Khrustalev, *ACS Catal.*, 2017, **7**, 205-209.
5. S. M. Barbon, J. V. Buddingh, R. R. Maar and J. B. Gilroy, *Inorg. Chem.*, 2017, **59**, 12003-12011,
6. G. Vantomme, S. Jiang and J.-M. Lehn, *J. Am. Chem. Soc.*, 2014, **136**, 9509-9518.
7. N. Panda and A. K. Jena, *J. Org. Chem.*, 2012, **77**, 9401-9406.
8. M. S. Ledovskaya, V. V. Voronin, M. V. Polynski, A. N. Lebedev, V. P. Ananikov, *Eur. J. Org. Chem.*, 2020, 4571-4580.
9. V. V. Voronin, M. S. Ledovskaya, E. G. Gordeev, K. S. Rodygin and V. P. Ananikov, *J. Org. Chem.*, 2018, **83**, 3819-3828.

10. L. O. Sullivan, K. V. Patel, B. C. Rowley, D. K. Brownsey, E. Gorobets, B. S. Gelfand, J. F. Van Humbeck and D. J. Derksen, *J. Org. Chem.*, 2022, **87**, 846-854.
11. N. Panda and S. Ojha, *J. Organomet. Chem.*, 2018, **861**, 244-251.
12. A. Balbi, M. Anzaldi, C. Macciò, C. Aiello, M. Mazzei, R. Gangemi, P. Castagnola, M. Miele, C. Rosano and M. Viale, *Eur. J. Med. Chem.*, 2011, **46**, 5293-5309.
13. J. Hu, Y. Cheng, Y. Yang and Y. Rao, *Chem. Commun.*, 2011, **47**, 10133-10135.
14. M. Nayak and S. Batra, *RSC Adv.*, 2012, **2**, 3367-3373.

7.983  
7.978  
7.958  
7.821  
7.801  
7.521  
7.501  
7.477  
7.475  
7.456  
7.399  
7.381  
7.362  
7.344  
7.325  
7.307  
7.284  
6.812  
6.807

1,3-Diphenyl-1*H*-pyrazole (**2a**)

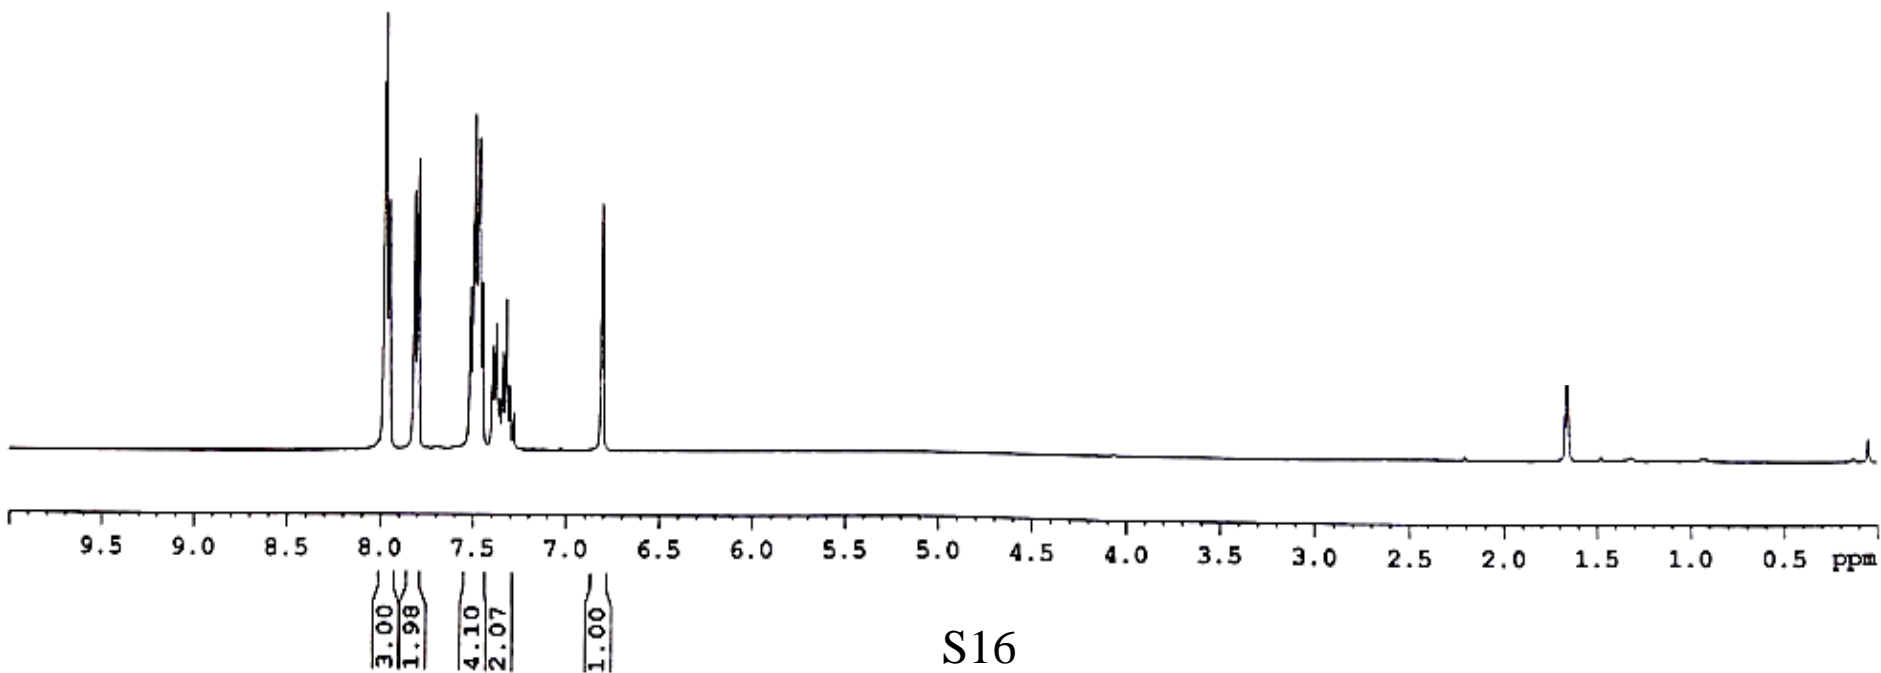

S16



1,3-Diphenyl-1*H*-pyrazole (**2a**)

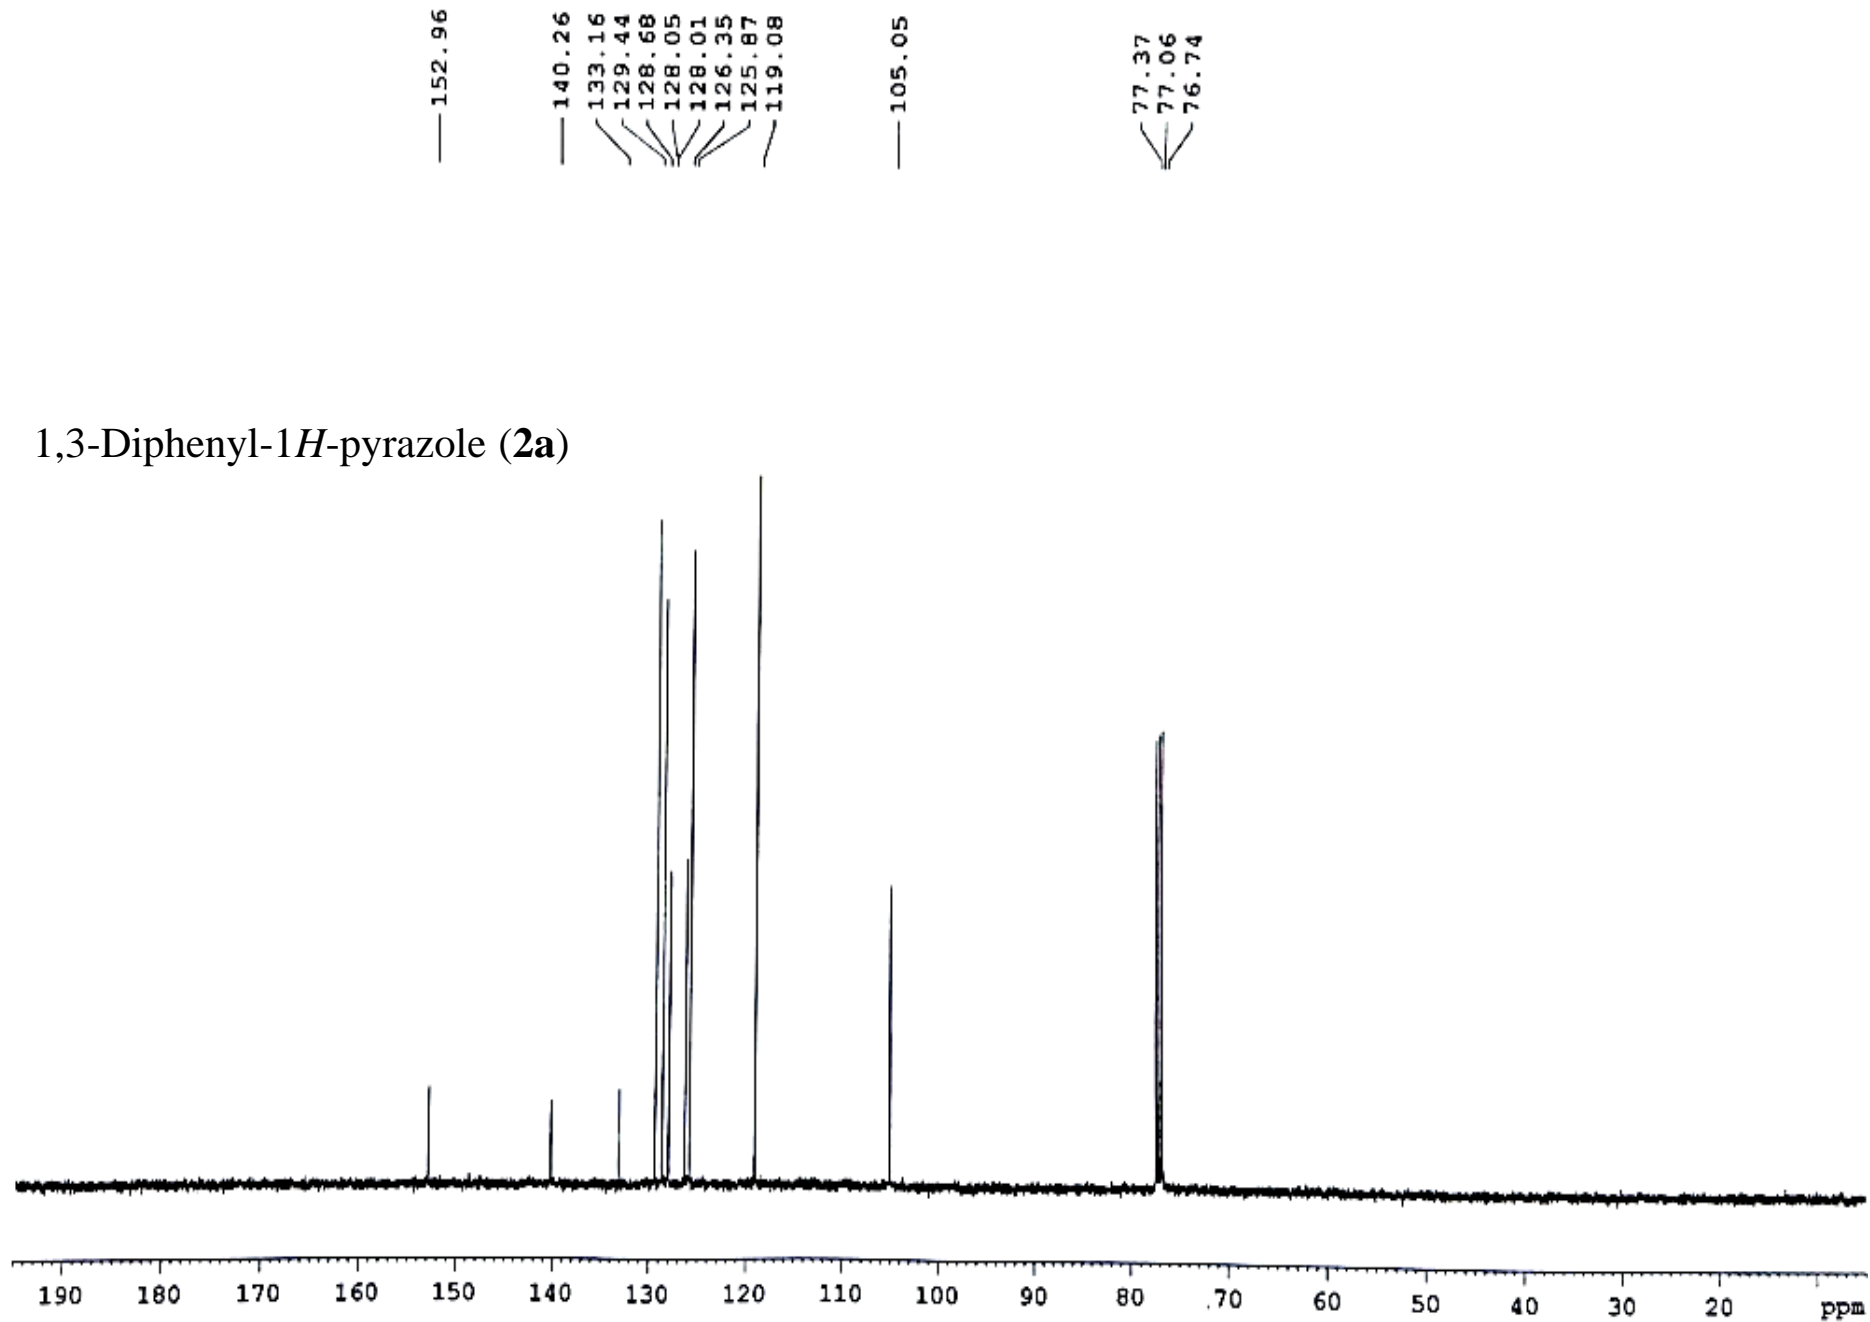

1-Phenyl-3-p-tolyl-1*H*-pyrazole (**2b**)

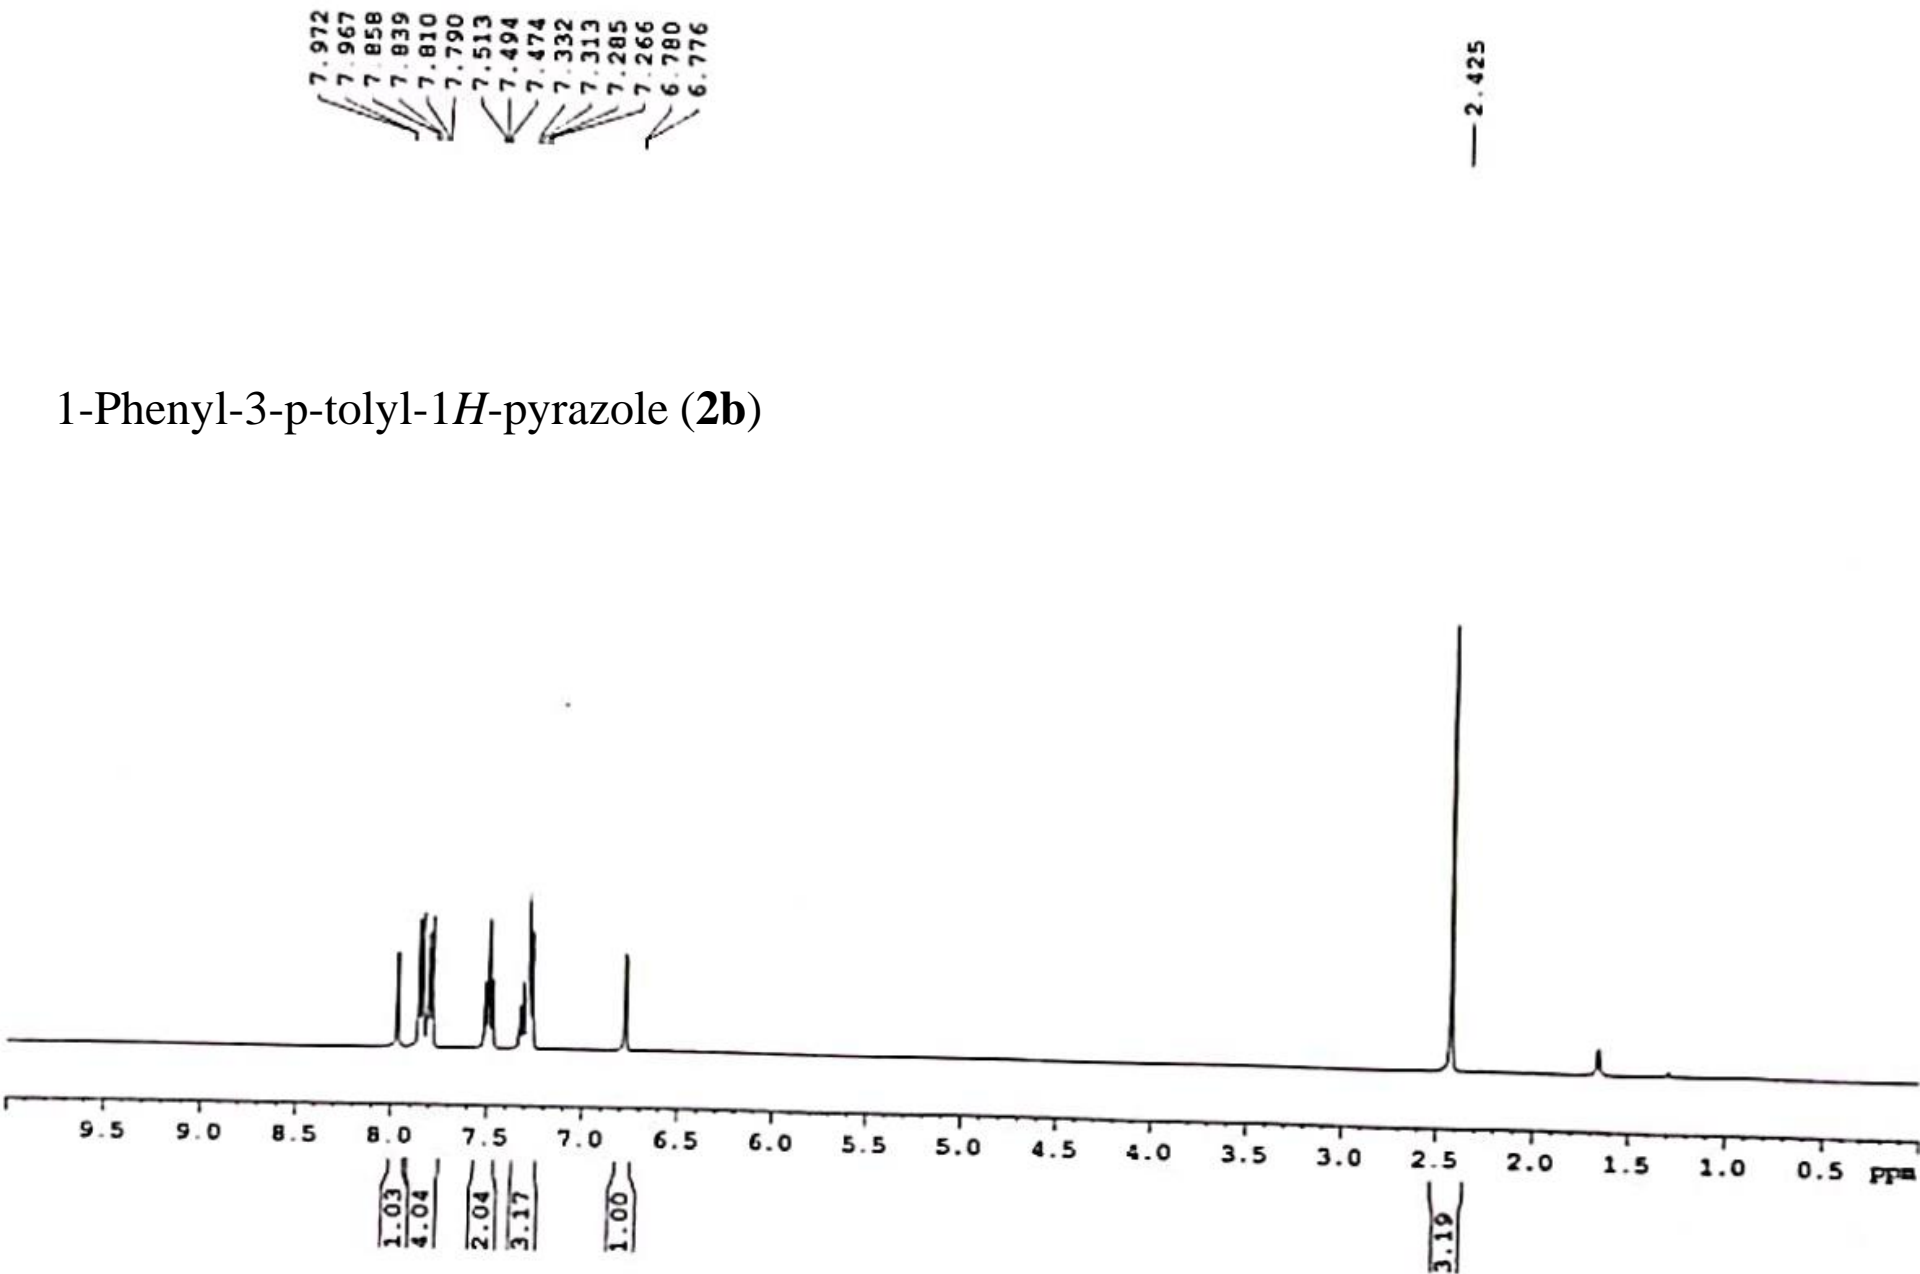

1-Phenyl-3-p-tolyl-1*H*-pyrazole (**2b**)

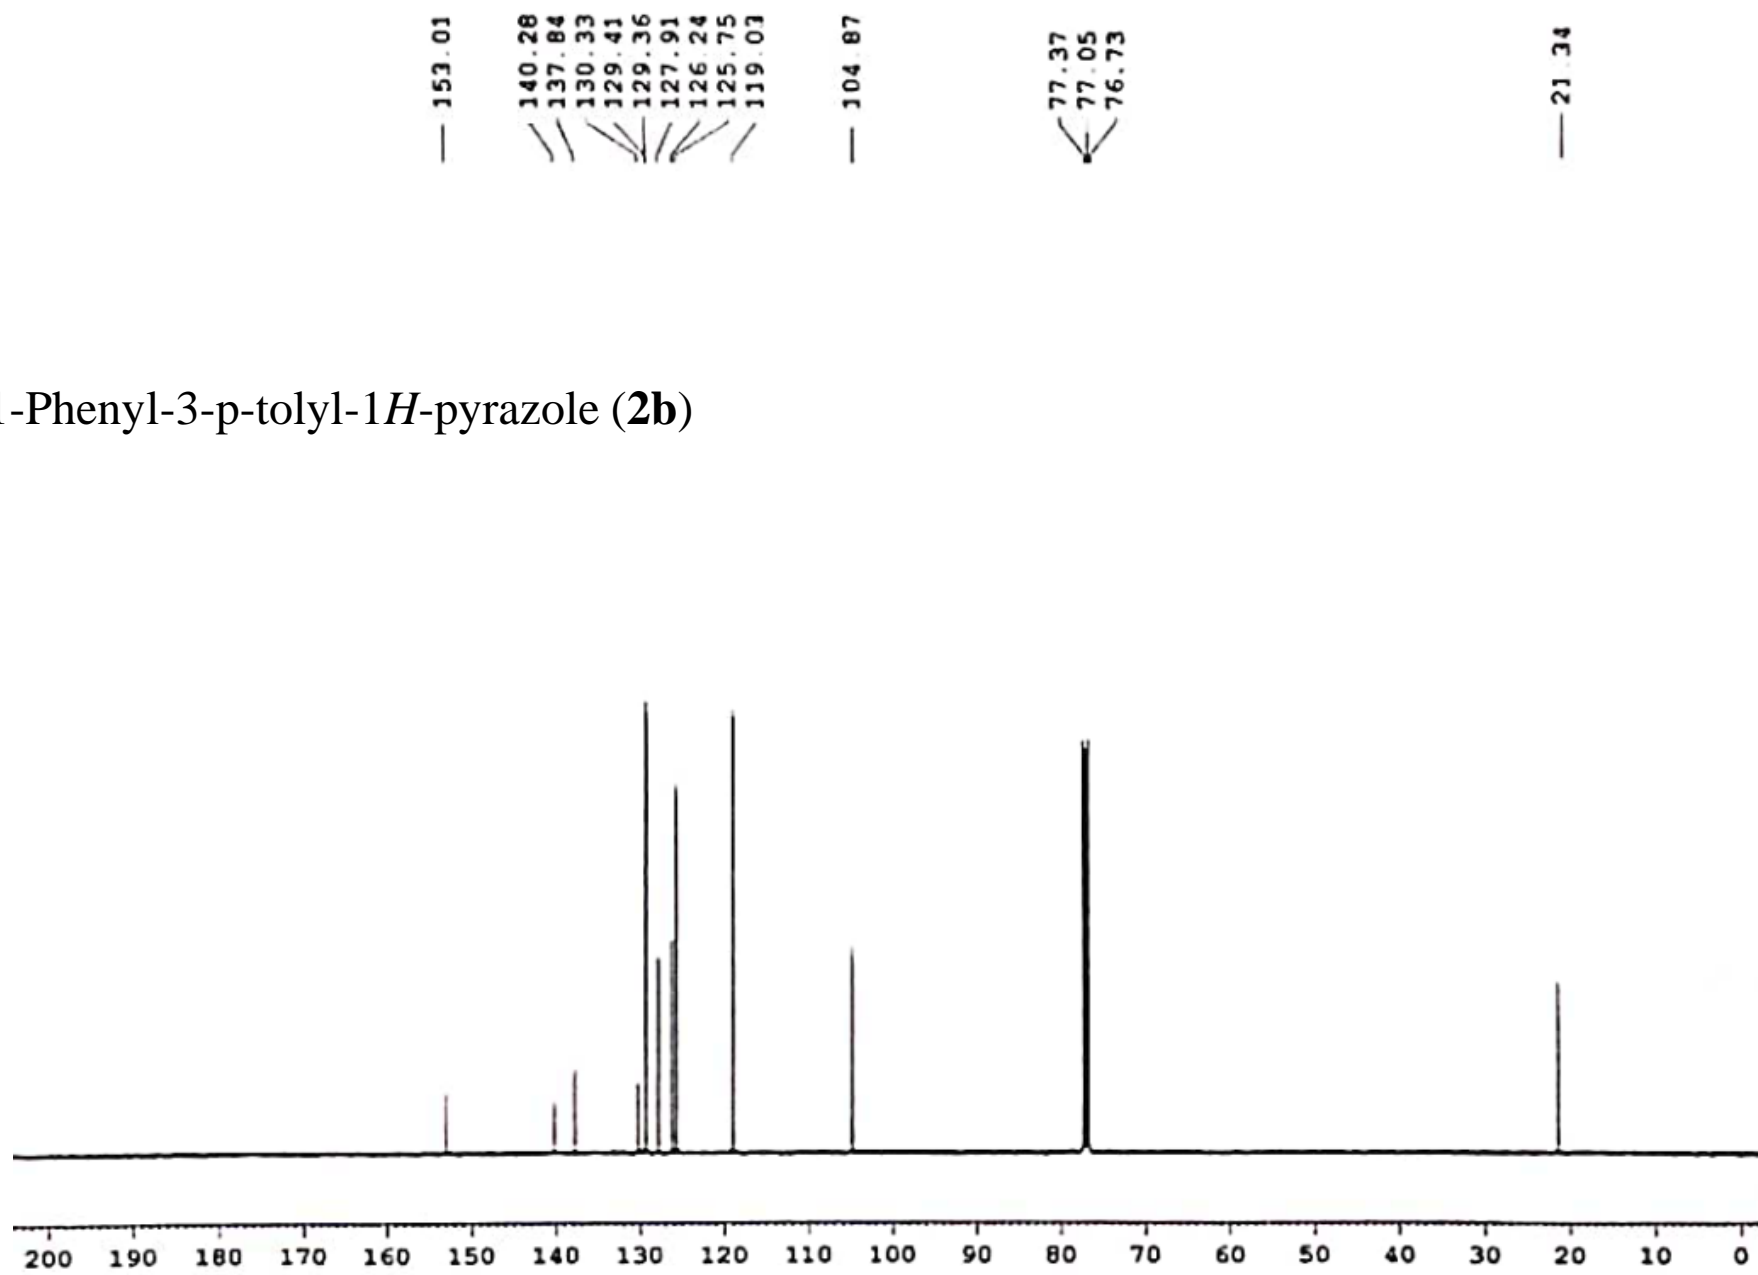

3-(4-Methoxyphenyl)-1-phenyl-1H-pyrazole (2c)

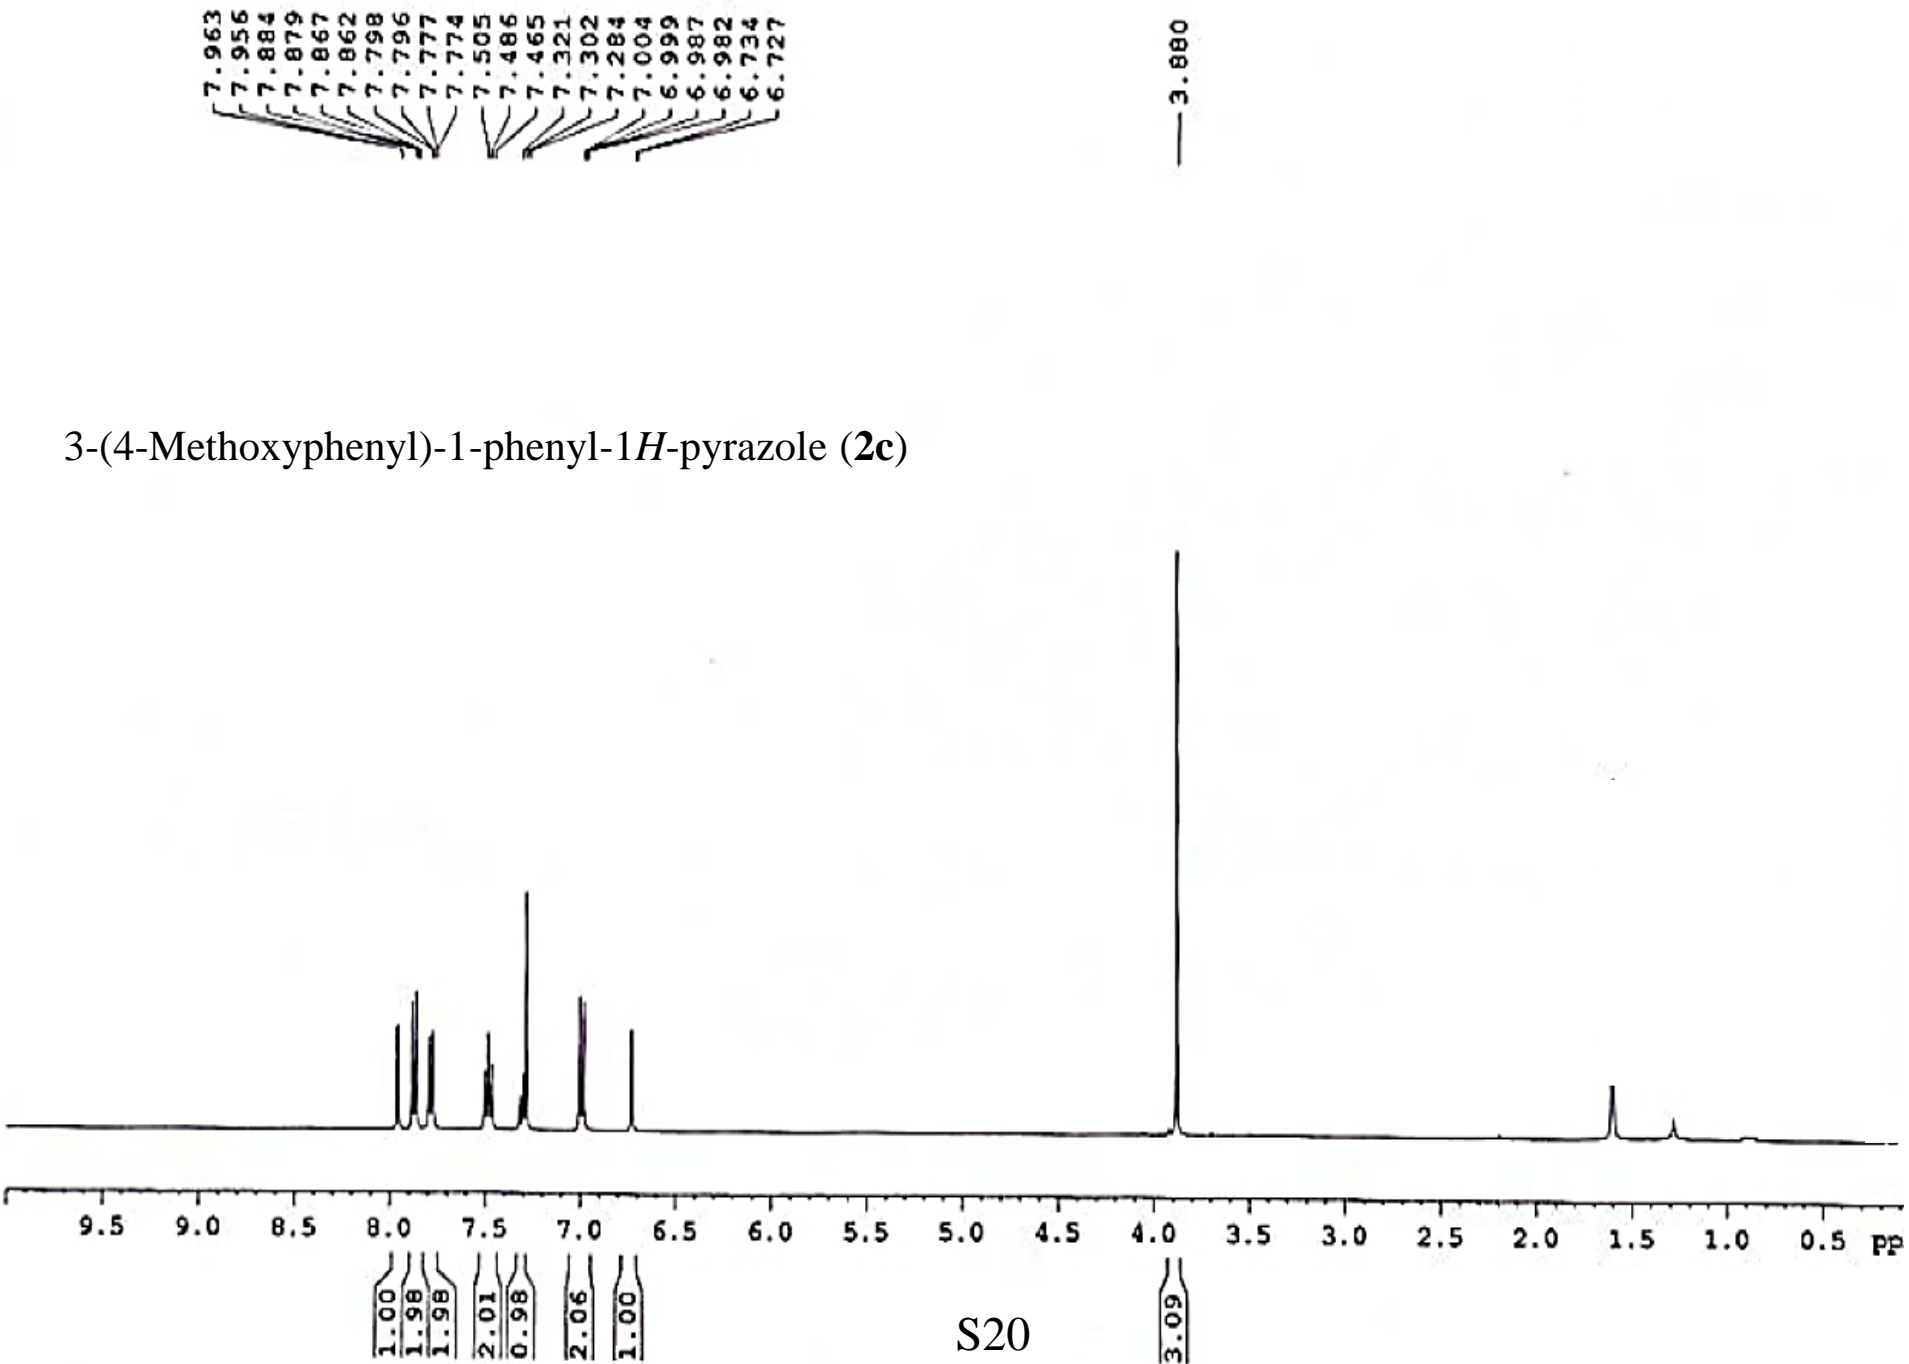

3-(4-Methoxyphenyl)-1-phenyl-1*H*-pyrazole (**2c**)

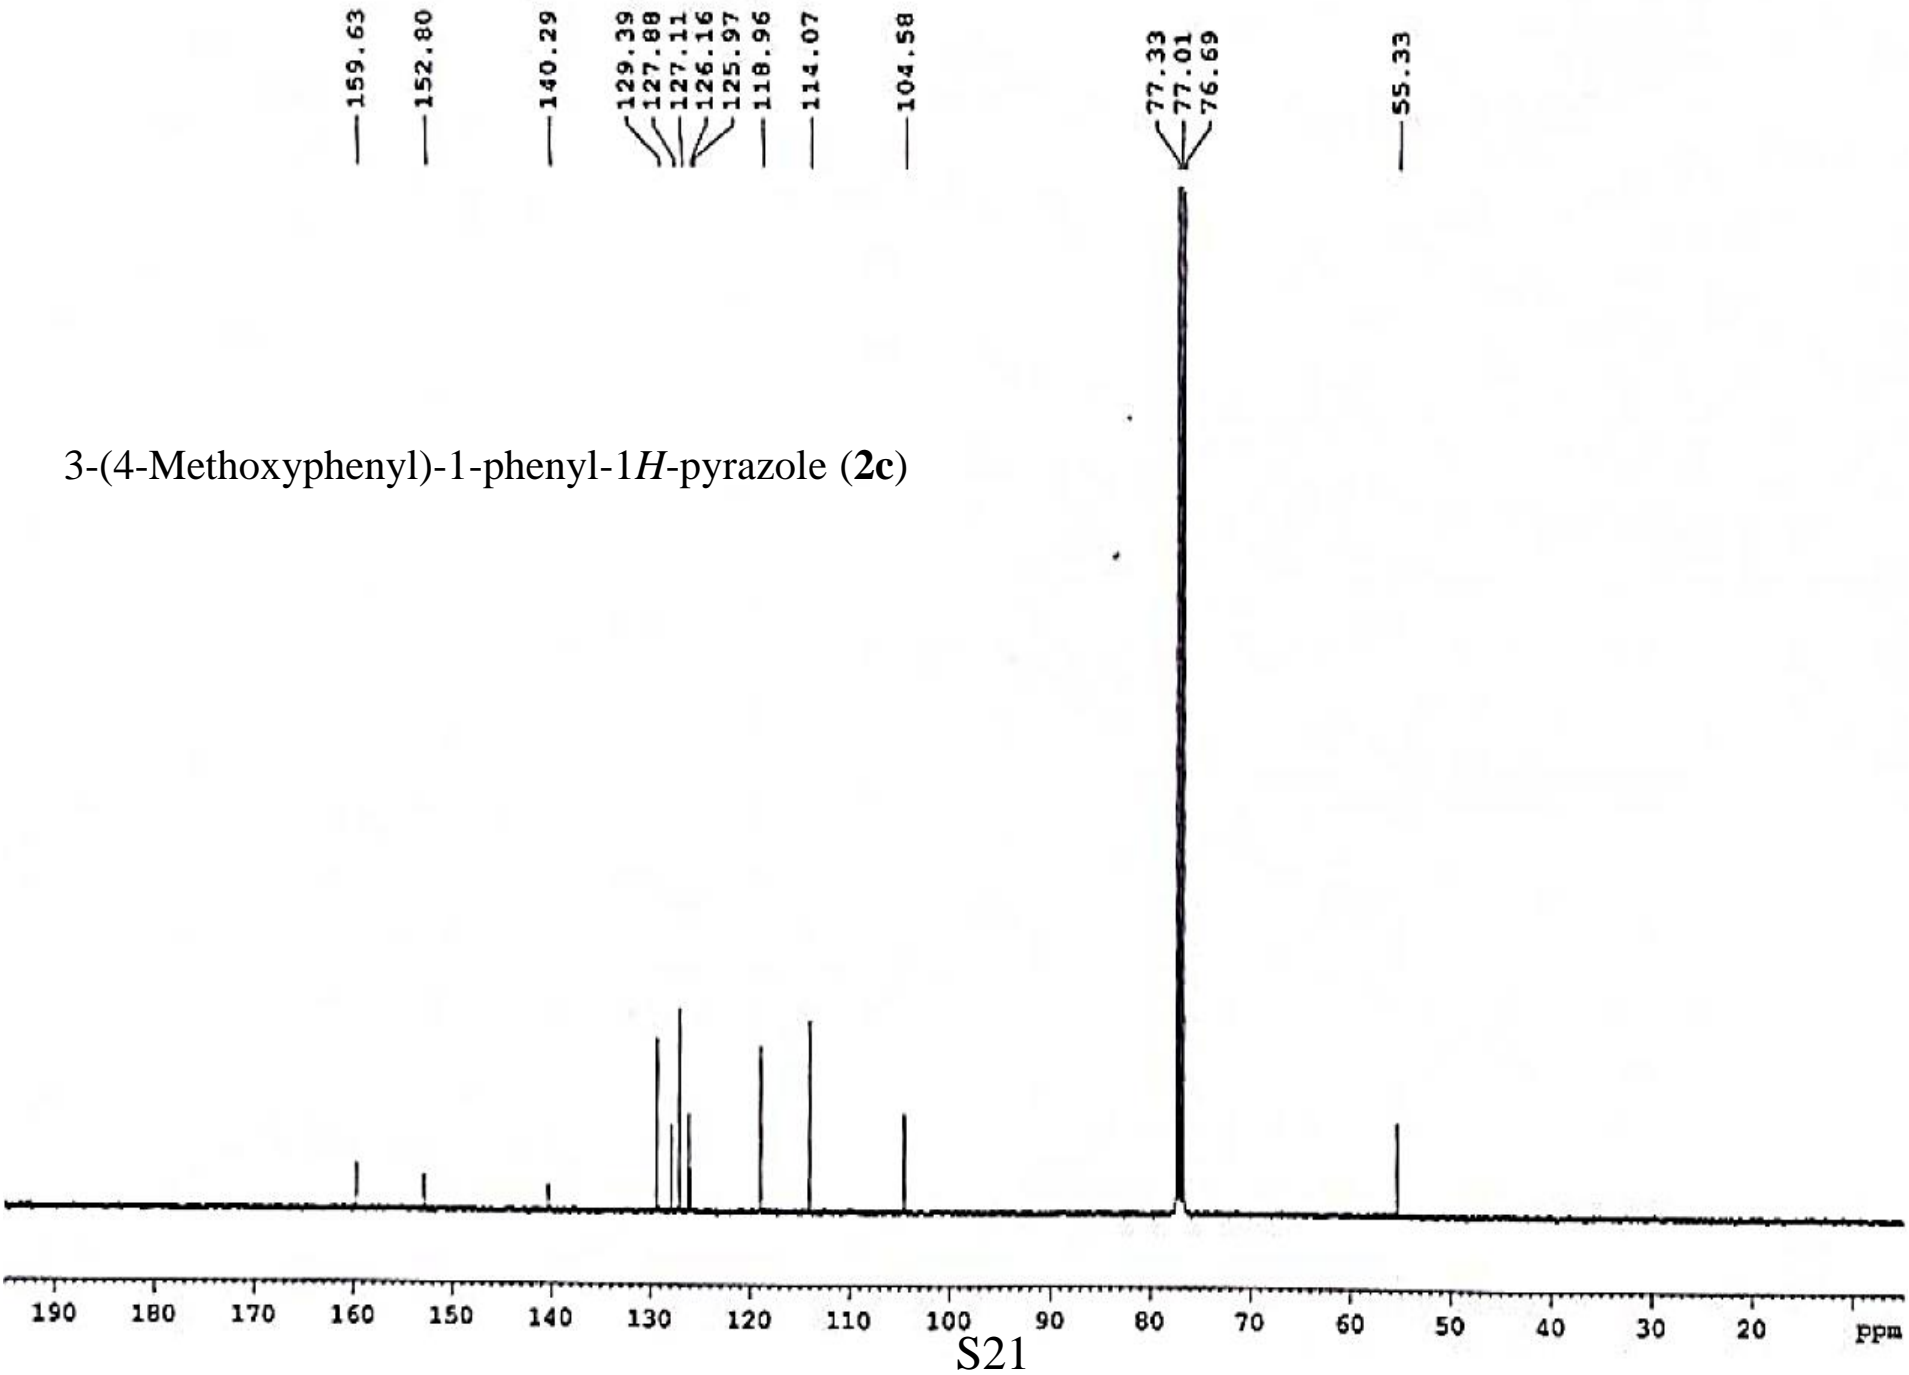

3-(3,4-Dimethoxyphenyl)-1-phenyl-1*H*-pyrazole (**2d**)

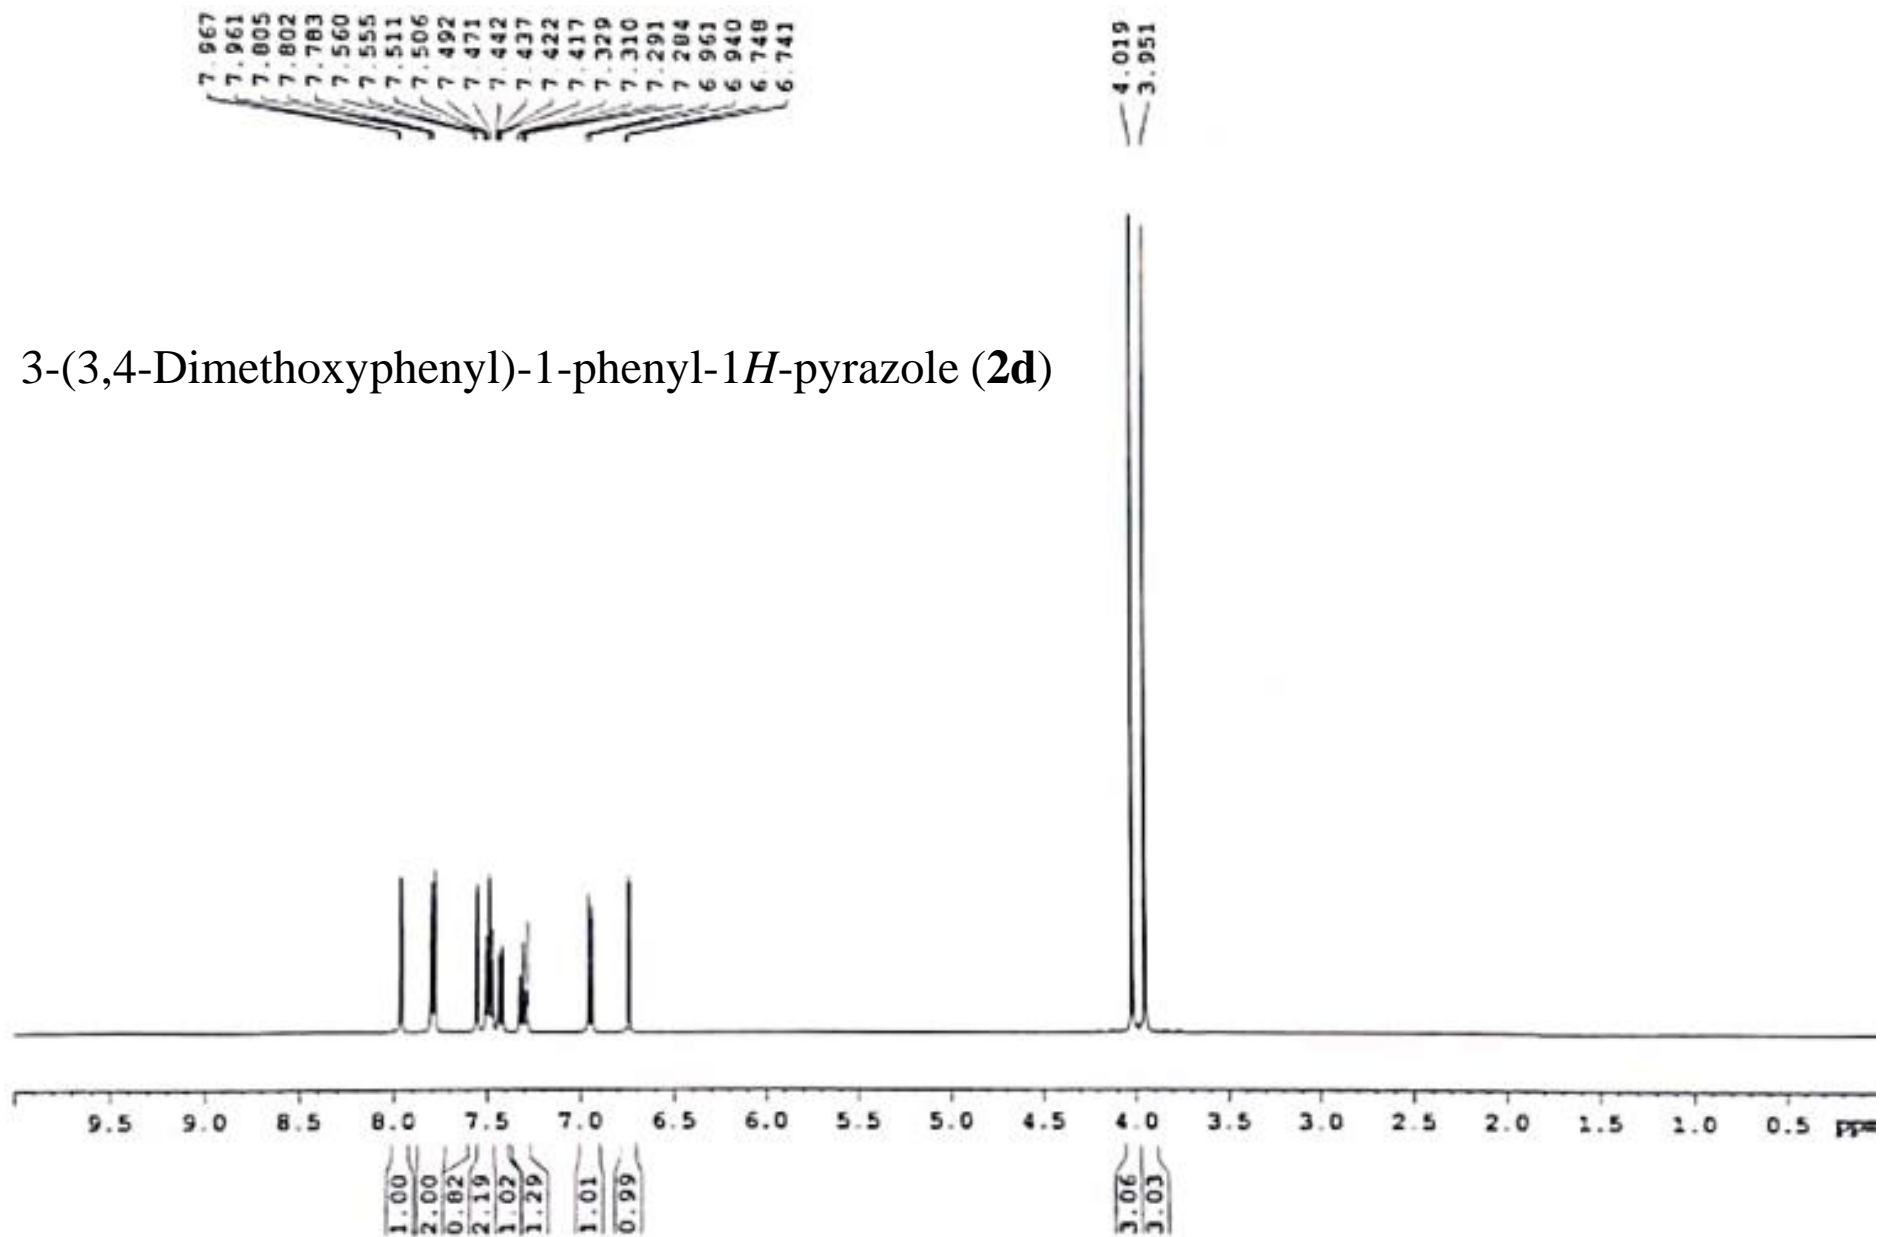

152.65  
149.14  
149.10  
140.21  
129.44  
128.07  
126.28  
126.18  
119.03  
118.51  
111.11  
108.79  
104.74  
77.38  
77.06  
76.75  
55.99  
55.95

3-(3,4-Dimethoxyphenyl)-1-phenyl-1*H*-pyrazole (**2d**)

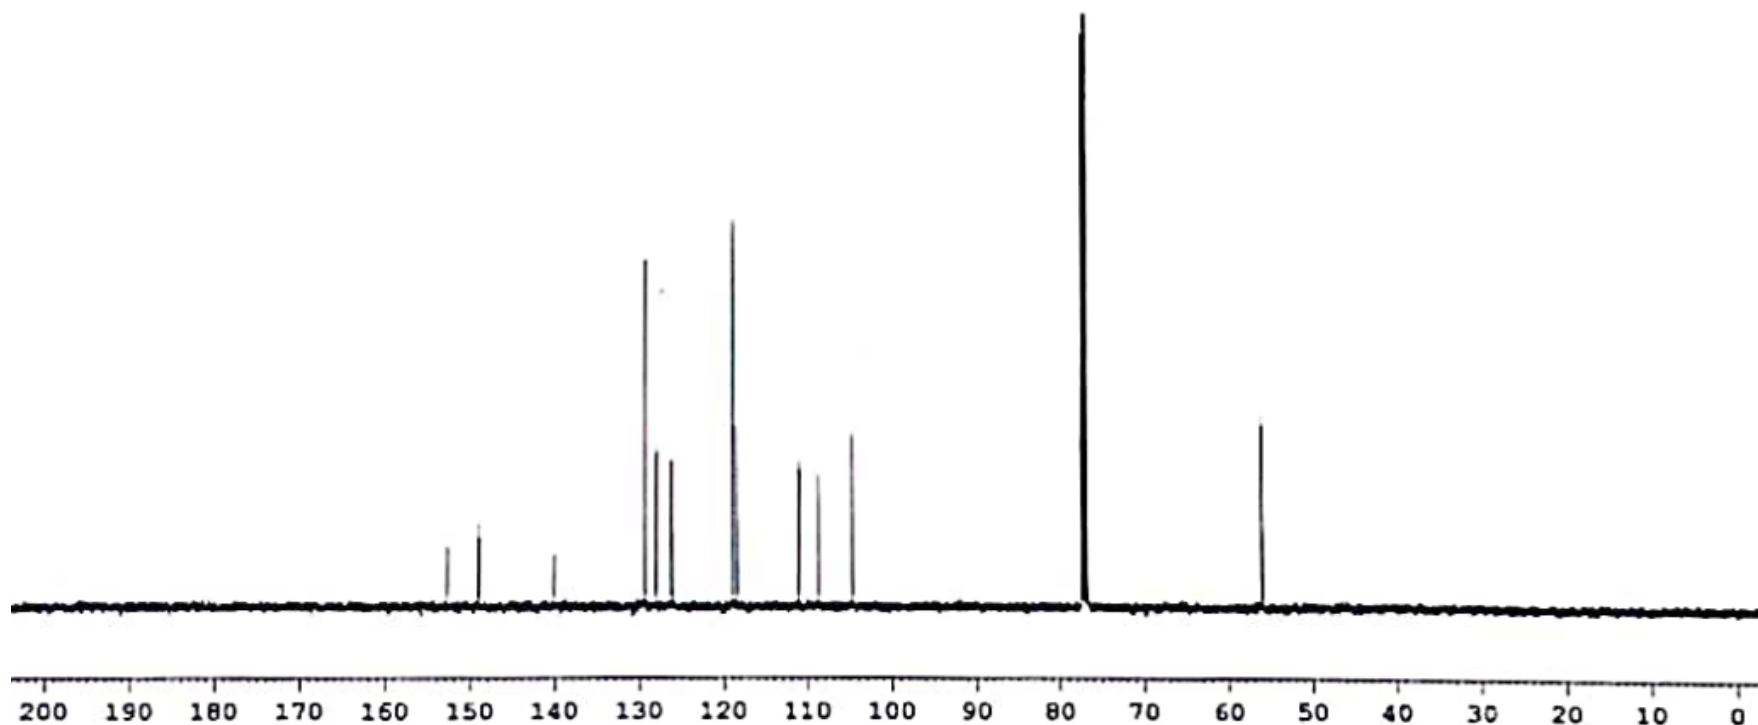

S23

— 10.843

8.011  
8.004  
7.726  
7.723  
7.704  
7.702  
7.662  
7.658  
7.642  
7.638  
7.537  
7.532  
7.519  
7.502  
7.497  
7.373  
7.355  
7.336  
7.310  
7.306  
7.289  
7.283  
7.271  
7.268  
7.107  
7.105  
7.087  
7.085  
6.995  
6.992  
6.976  
6.974  
6.958  
6.955  
6.891  
6.884

2-(1-Phenyl-1*H*-pyrazol-3-yl)phenol (**2e**)

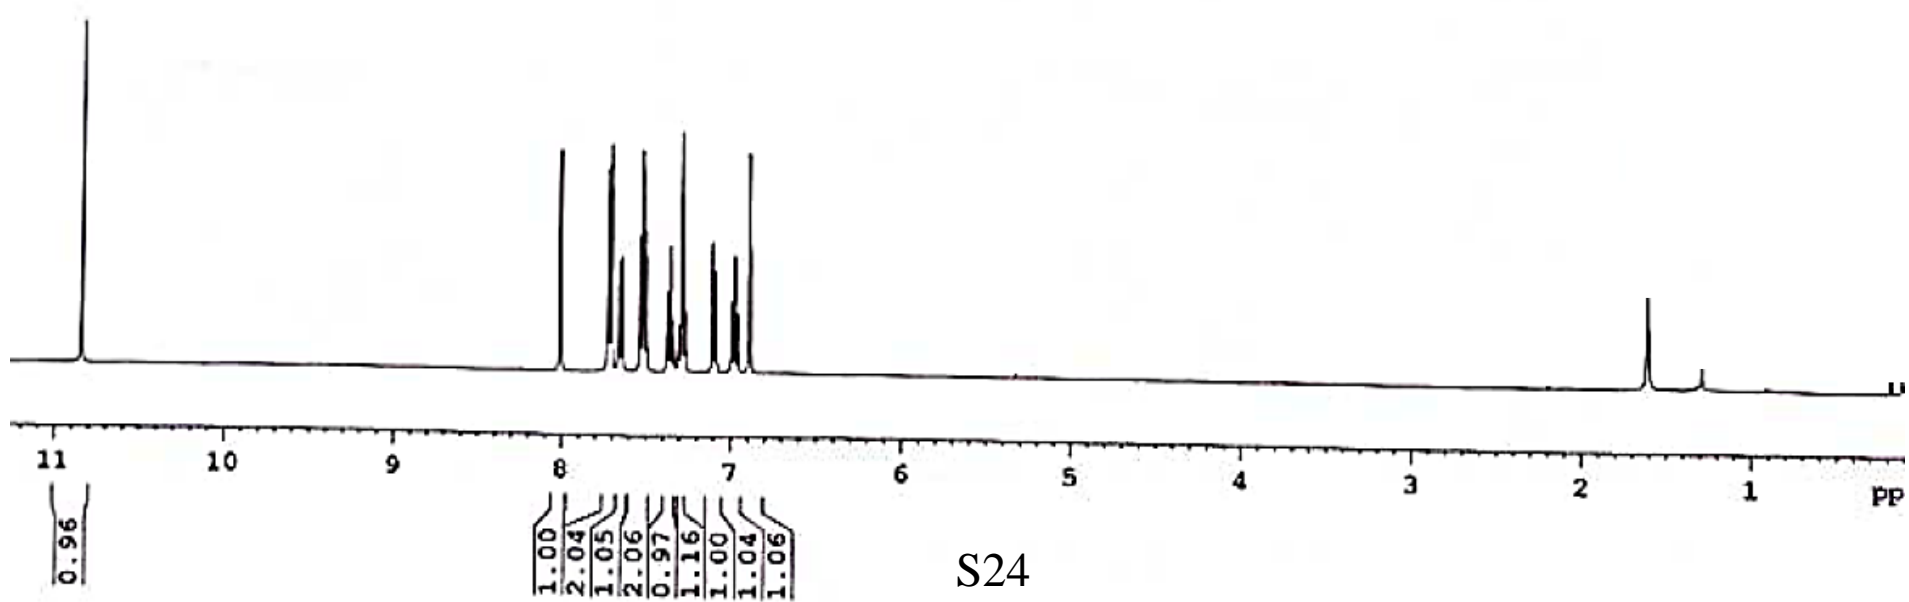



— 156.01  
— 152.95

— 139.30  
129.67  
129.63  
127.78  
126.82  
126.58  
119.39  
118.87  
117.20  
116.25

— 104.59

77.33  
77.02  
76.70

2-(1-Phenyl-1*H*-pyrazol-3-yl)phenol (**2e**)

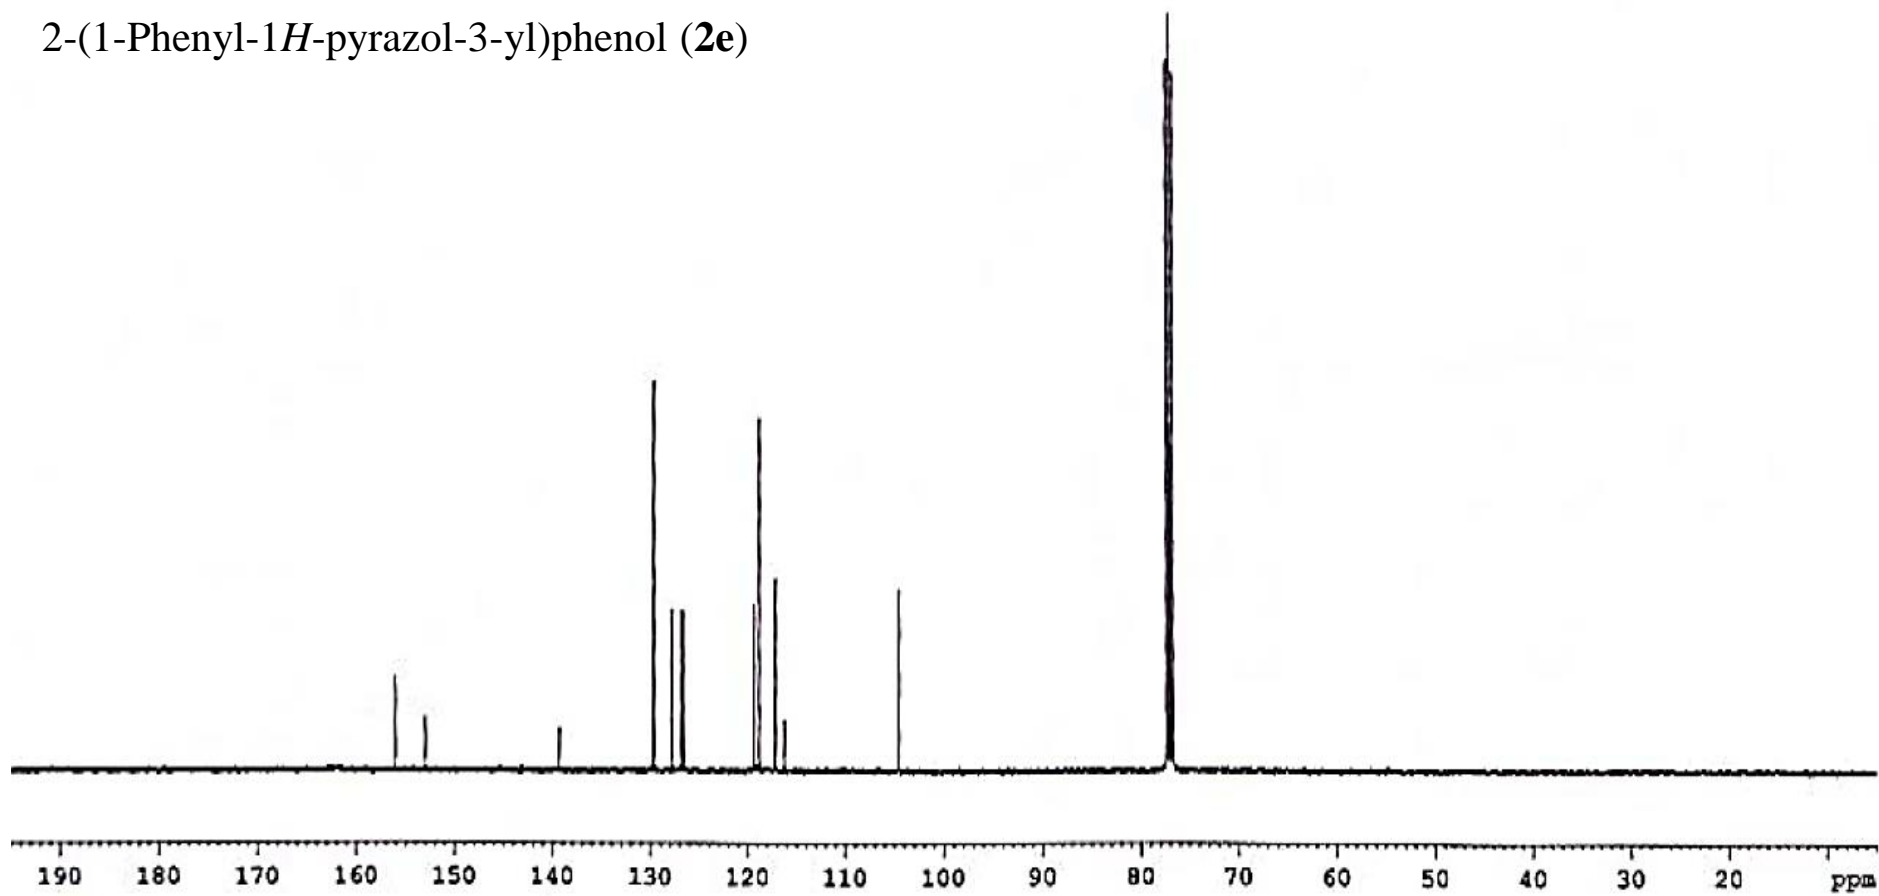

7.981  
7.974  
7.888  
7.884  
7.872  
7.867  
7.796  
7.794  
7.775  
7.517  
7.512  
7.498  
7.477  
7.434  
7.430  
7.417  
7.413  
7.346  
7.328  
7.283  
6.773  
6.767

3-(4-Chlorophenyl)-1-phenyl-1*H*-pyrazole (**2f**)

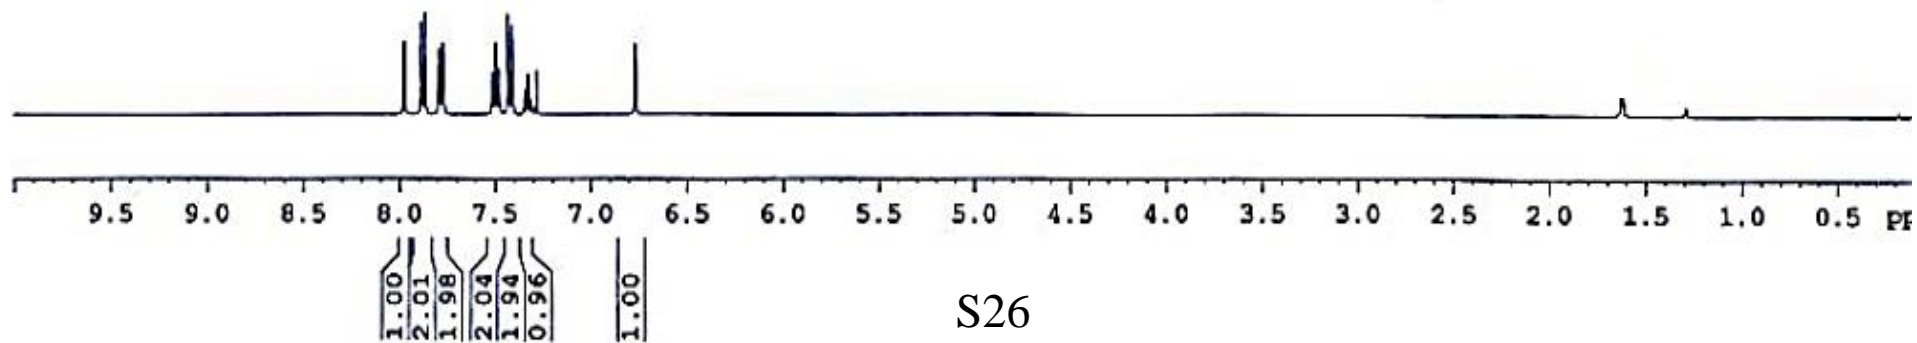

S26

— 151.82

— 140.12

133.76

131.67

129.46

128.83

128.18

127.08

126.52

119.10

— 104.97

77.34

77.02

76.70

3-(4-Chlorophenyl)-1-phenyl-1*H*-pyrazole (**2f**)

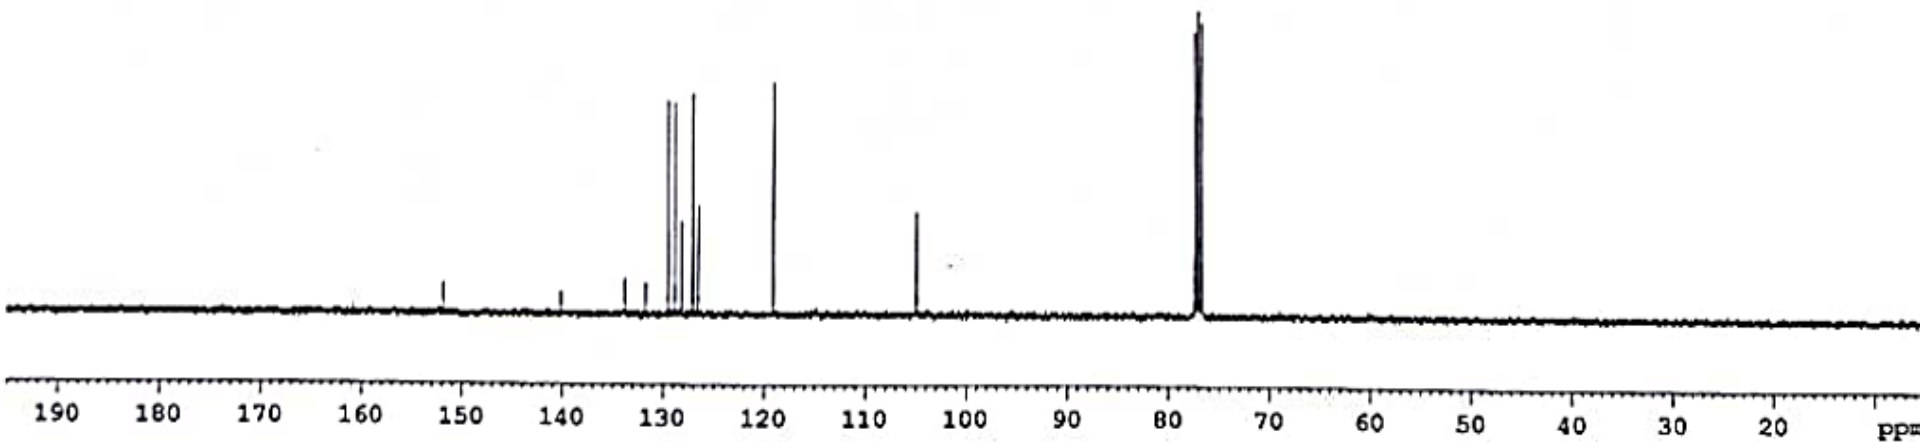

S27

8.015  
8.008  
7.981  
7.963  
7.811  
7.790  
7.517  
7.513  
7.498  
7.478  
7.388  
7.370  
7.350  
7.331  
7.316  
7.312  
7.298  
7.294  
7.284  
7.041  
7.035

3-(2-Chlorophenyl)-1-phenyl-1*H*-pyrazole (**2g**)

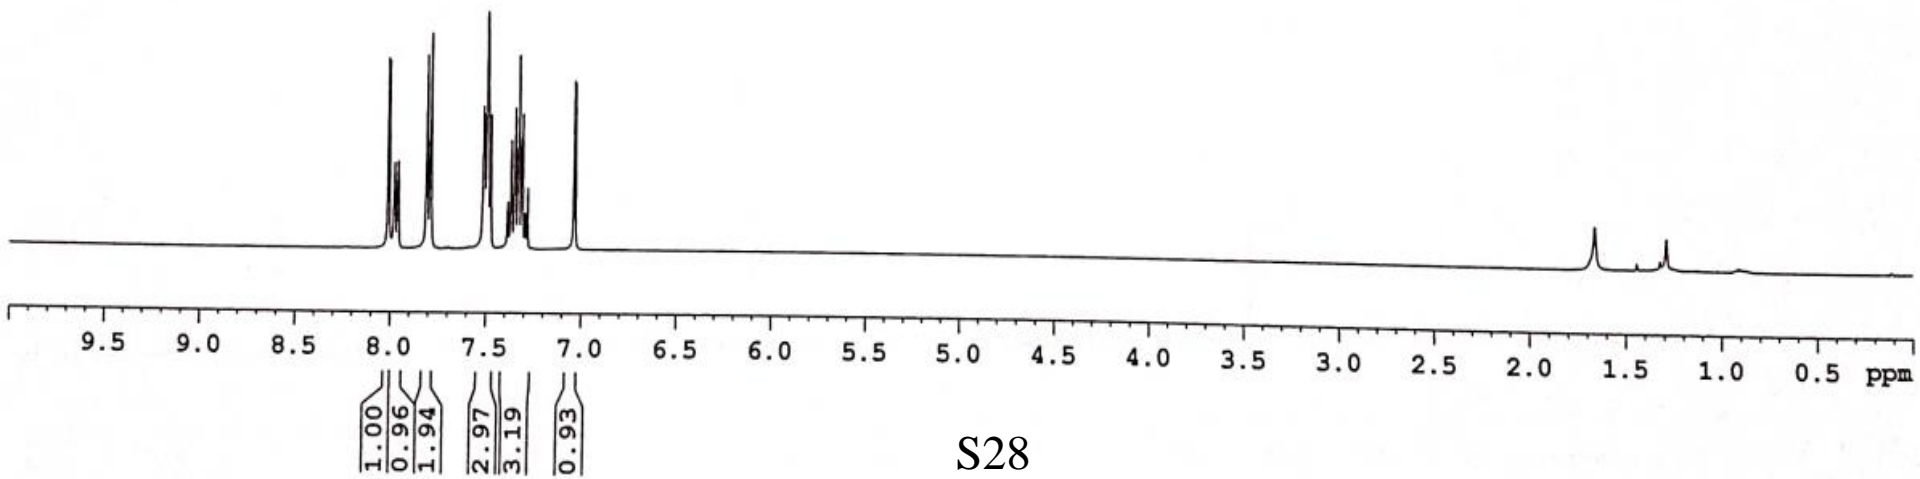

S28

3-(2-Chlorophenyl)-1-phenyl-1*H*-pyrazole (**2g**)

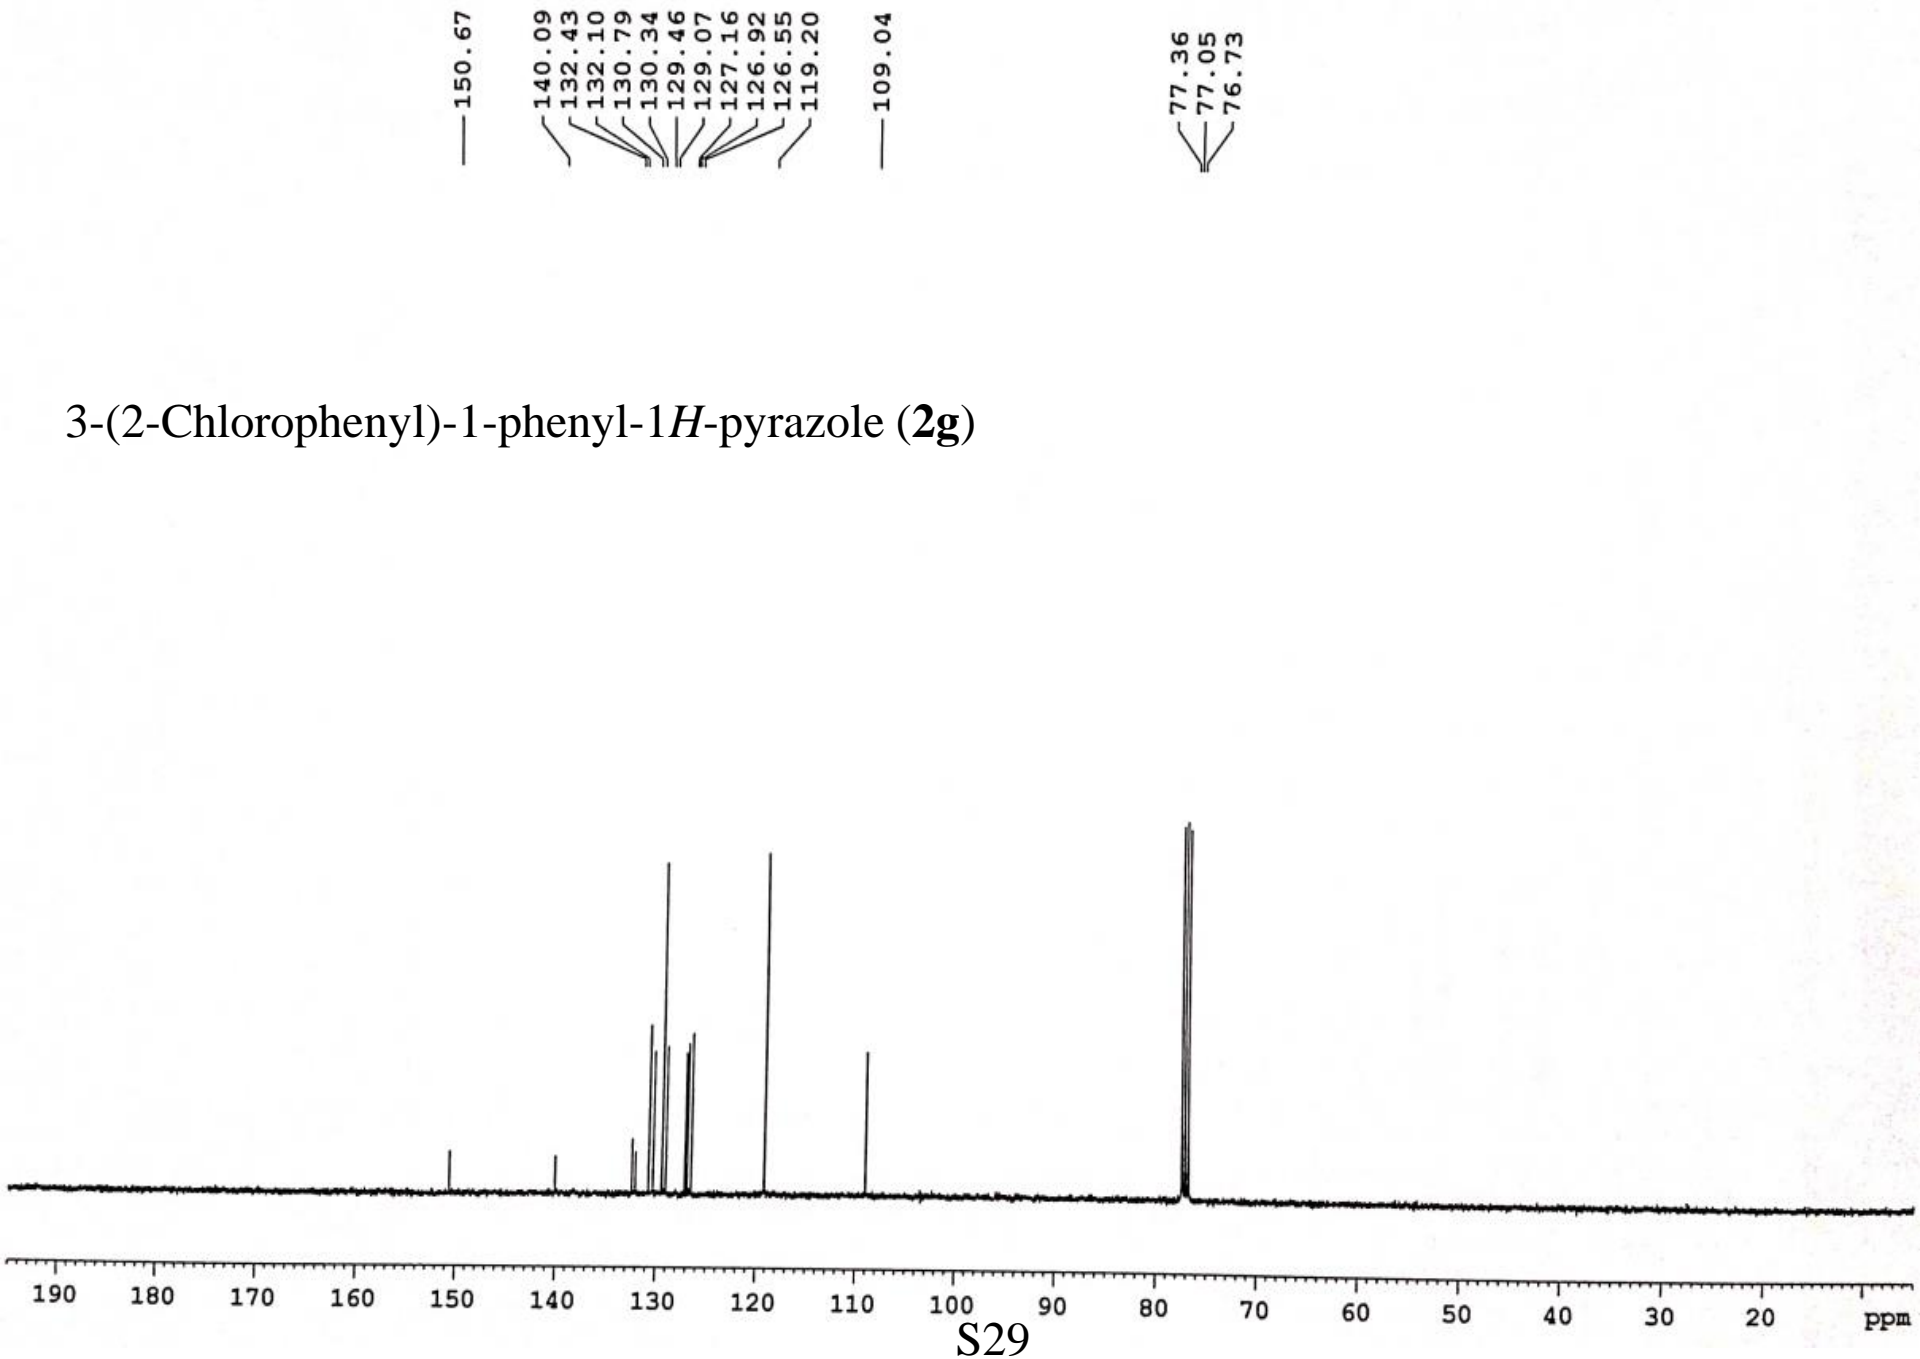

7.981  
7.975  
7.828  
7.807  
7.793  
7.774  
7.588  
7.567  
7.518  
7.498  
7.478  
7.348  
7.330  
7.311  
7.284  
6.777  
6.771

3-(4-Bromophenyl)-1-phenyl-1*H*-pyrazole (**2h**)

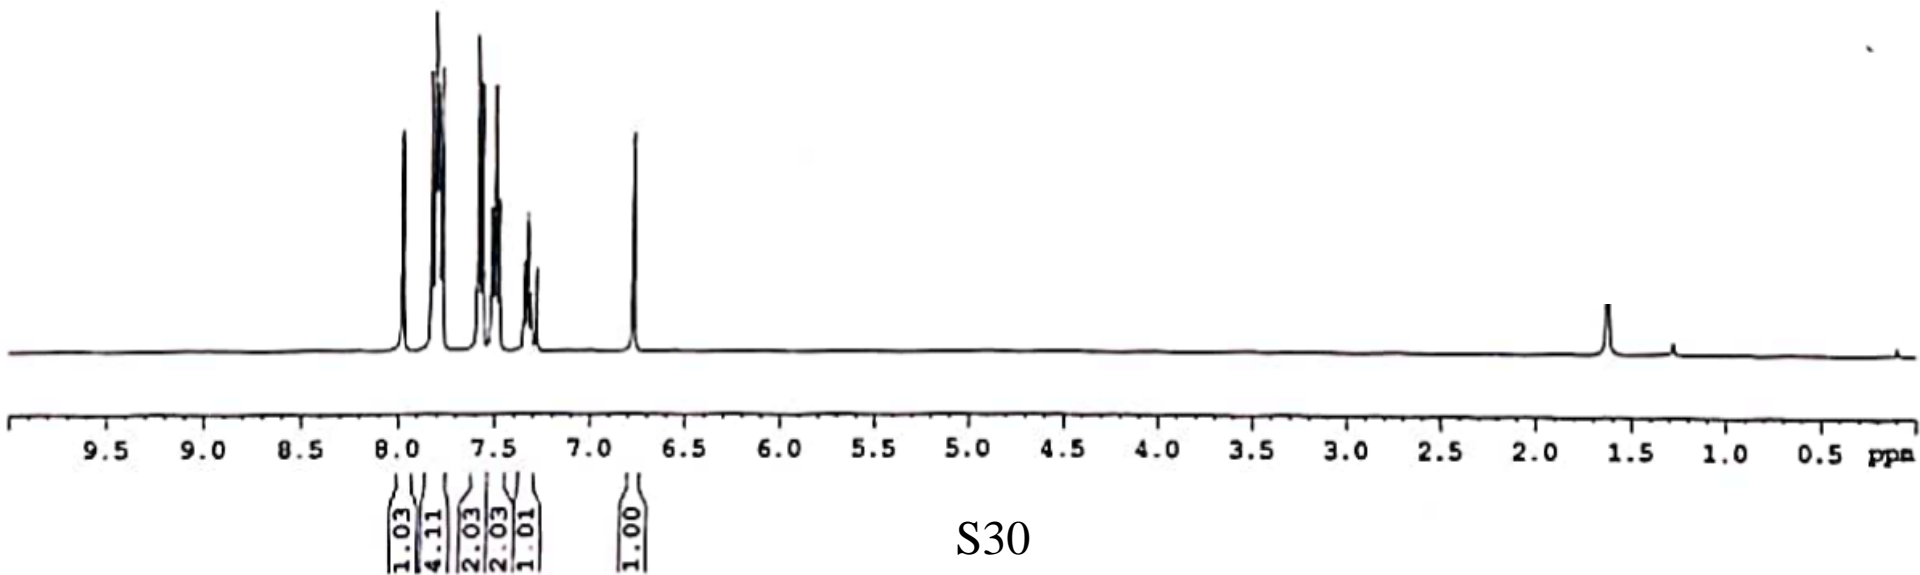

S30

3-(4-Bromophenyl)-1-phenyl-1*H*-pyrazole (**2h**)

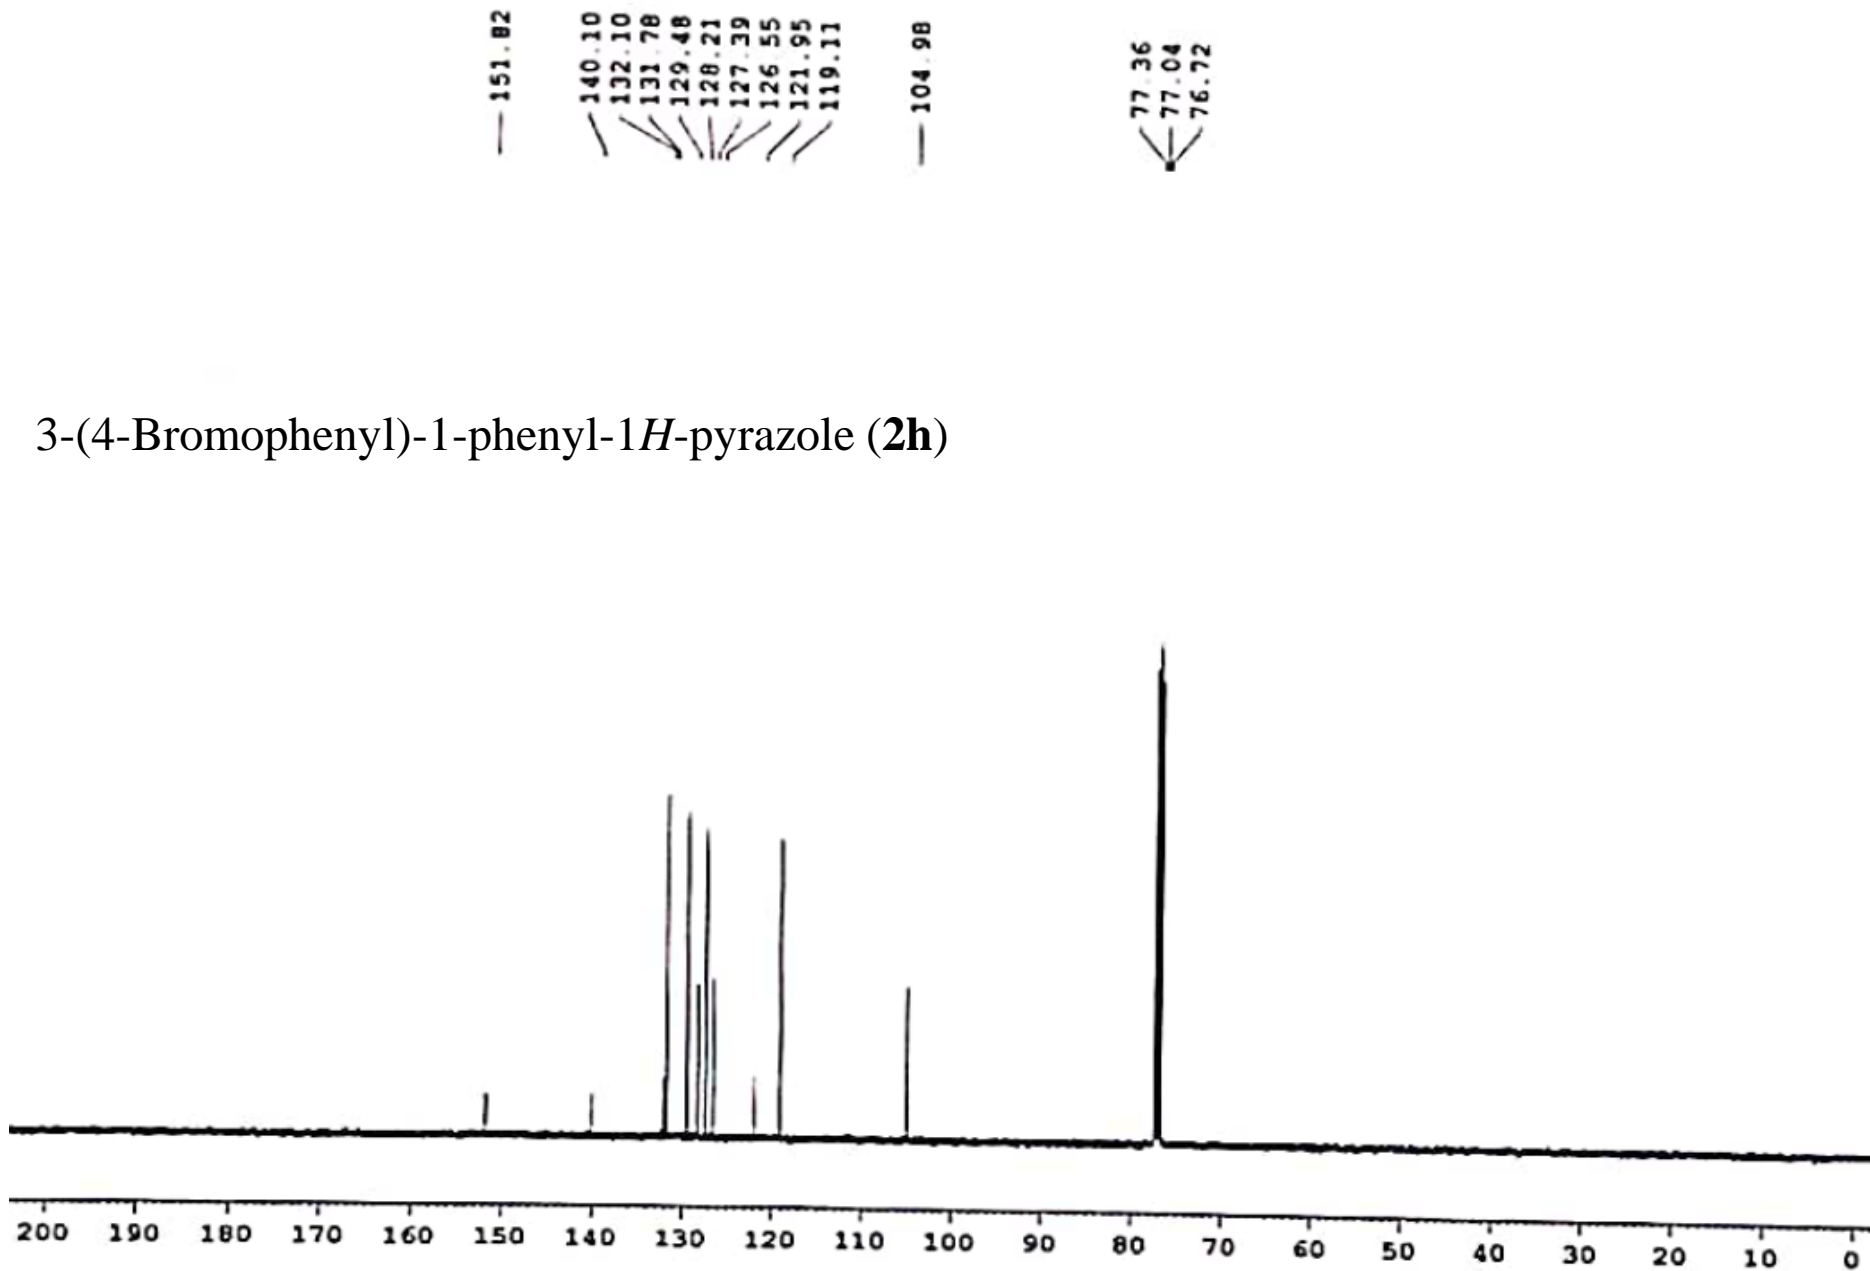

8.047  
8.027  
8.018  
8.011  
7.800  
7.780  
7.737  
7.716  
7.534  
7.514  
7.495  
7.377  
7.358  
7.340  
7.284  
6.850  
6.844

4-(1-Phenyl-1*H*-pyrazol-3-yl)benzotrile (**2i**)

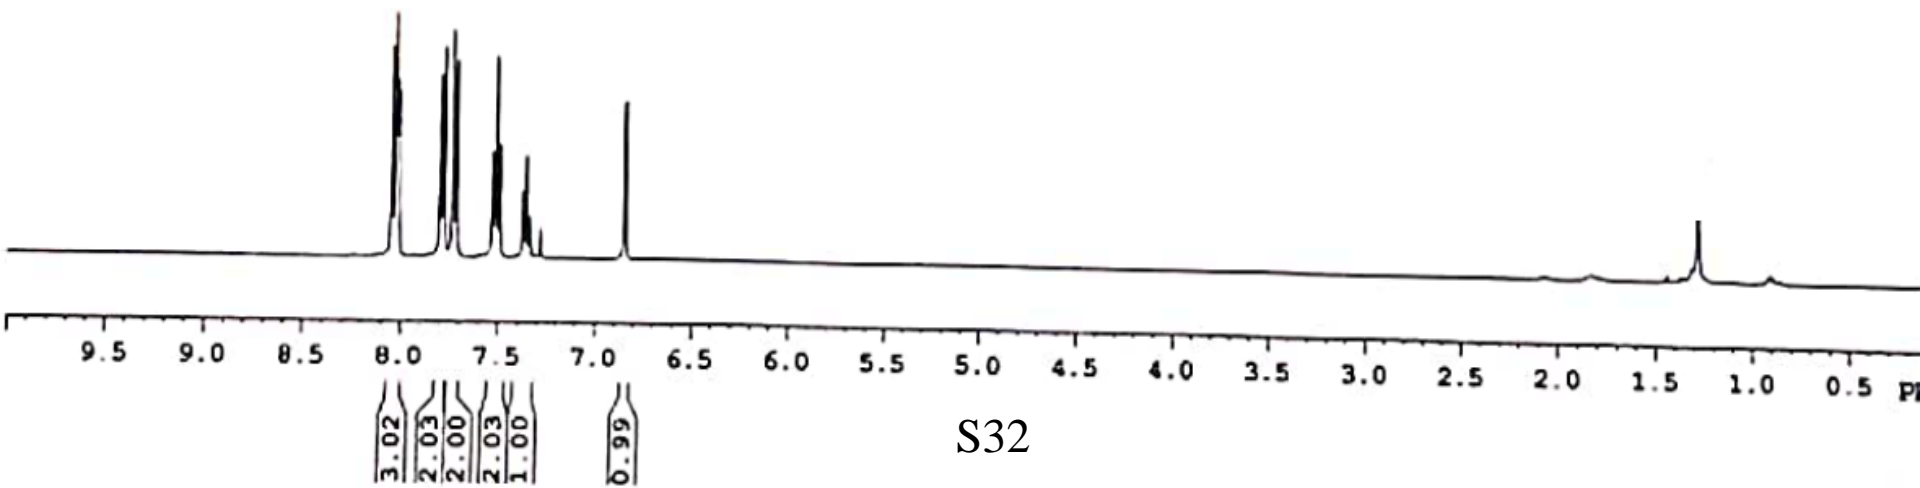

S32



— 150.87  
139.09  
137.49  
132.55  
129.57  
128.58  
126.95  
126.17  
119.22  
119.10  
— 111.18  
— 105.61  
  
77.39  
77.08  
76.76

4-(1-phenyl-1*H*-pyrazol-3-yl)benzotrile (**2i**)

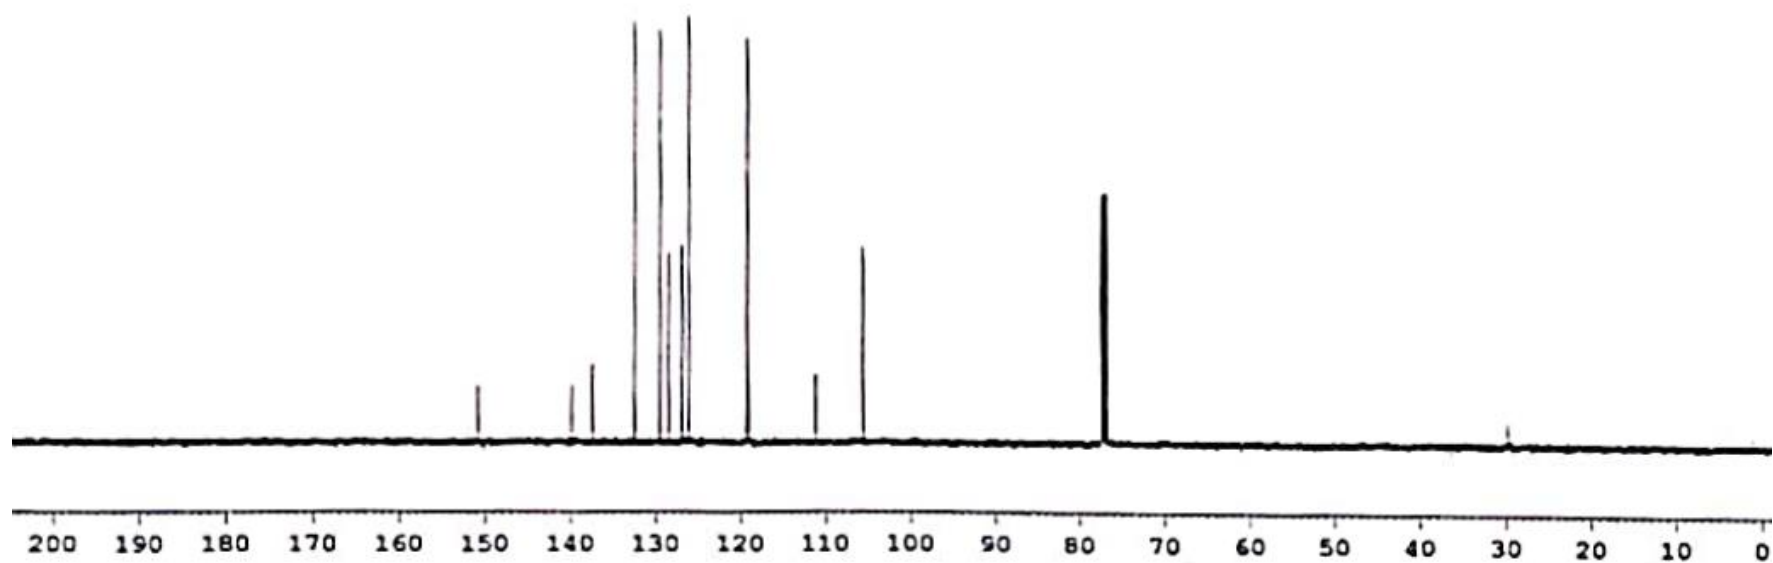

8.331  
8.309  
8.115  
8.093  
8.045  
8.039  
7.817  
7.798  
7.548  
7.529  
7.509  
7.392  
7.374  
7.355  
7.284  
6.908  
6.902

3-(4-Nitrophenyl)-1-phenyl-1*H*-pyrazole (**2j**)

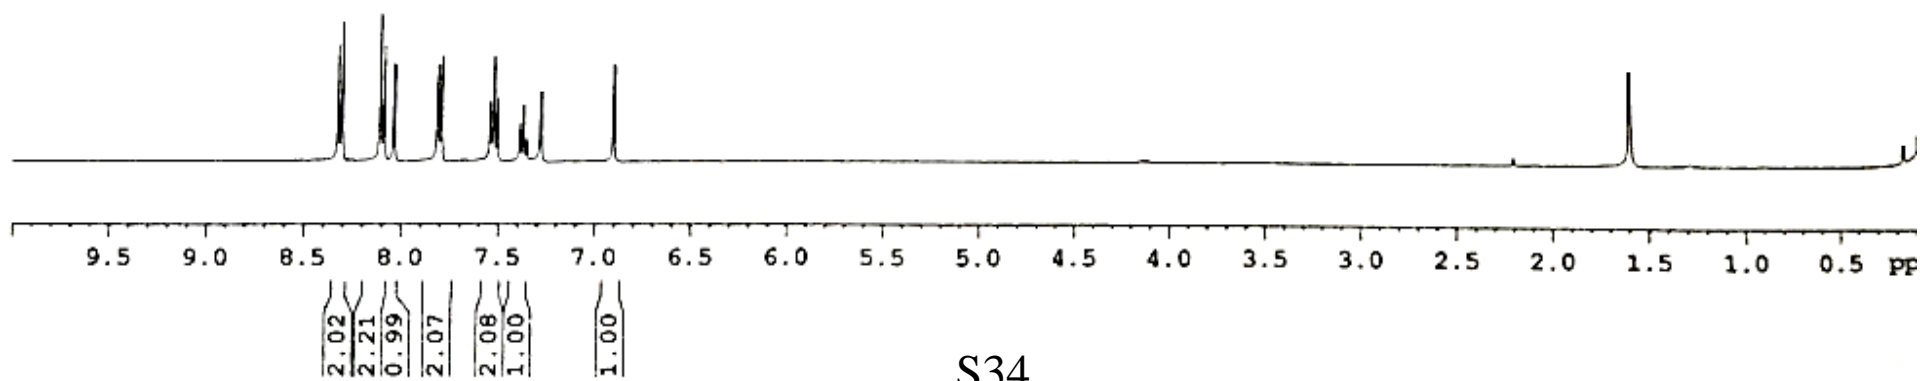

150.55  
147.31  
139.89  
139.41  
129.58  
128.67  
127.05  
126.23  
124.14  
119.29  
105.90  
77.33  
77.01  
76.69

3-(4-Nitrophenyl)-1-phenyl-1*H*-pyrazole (**2j**)

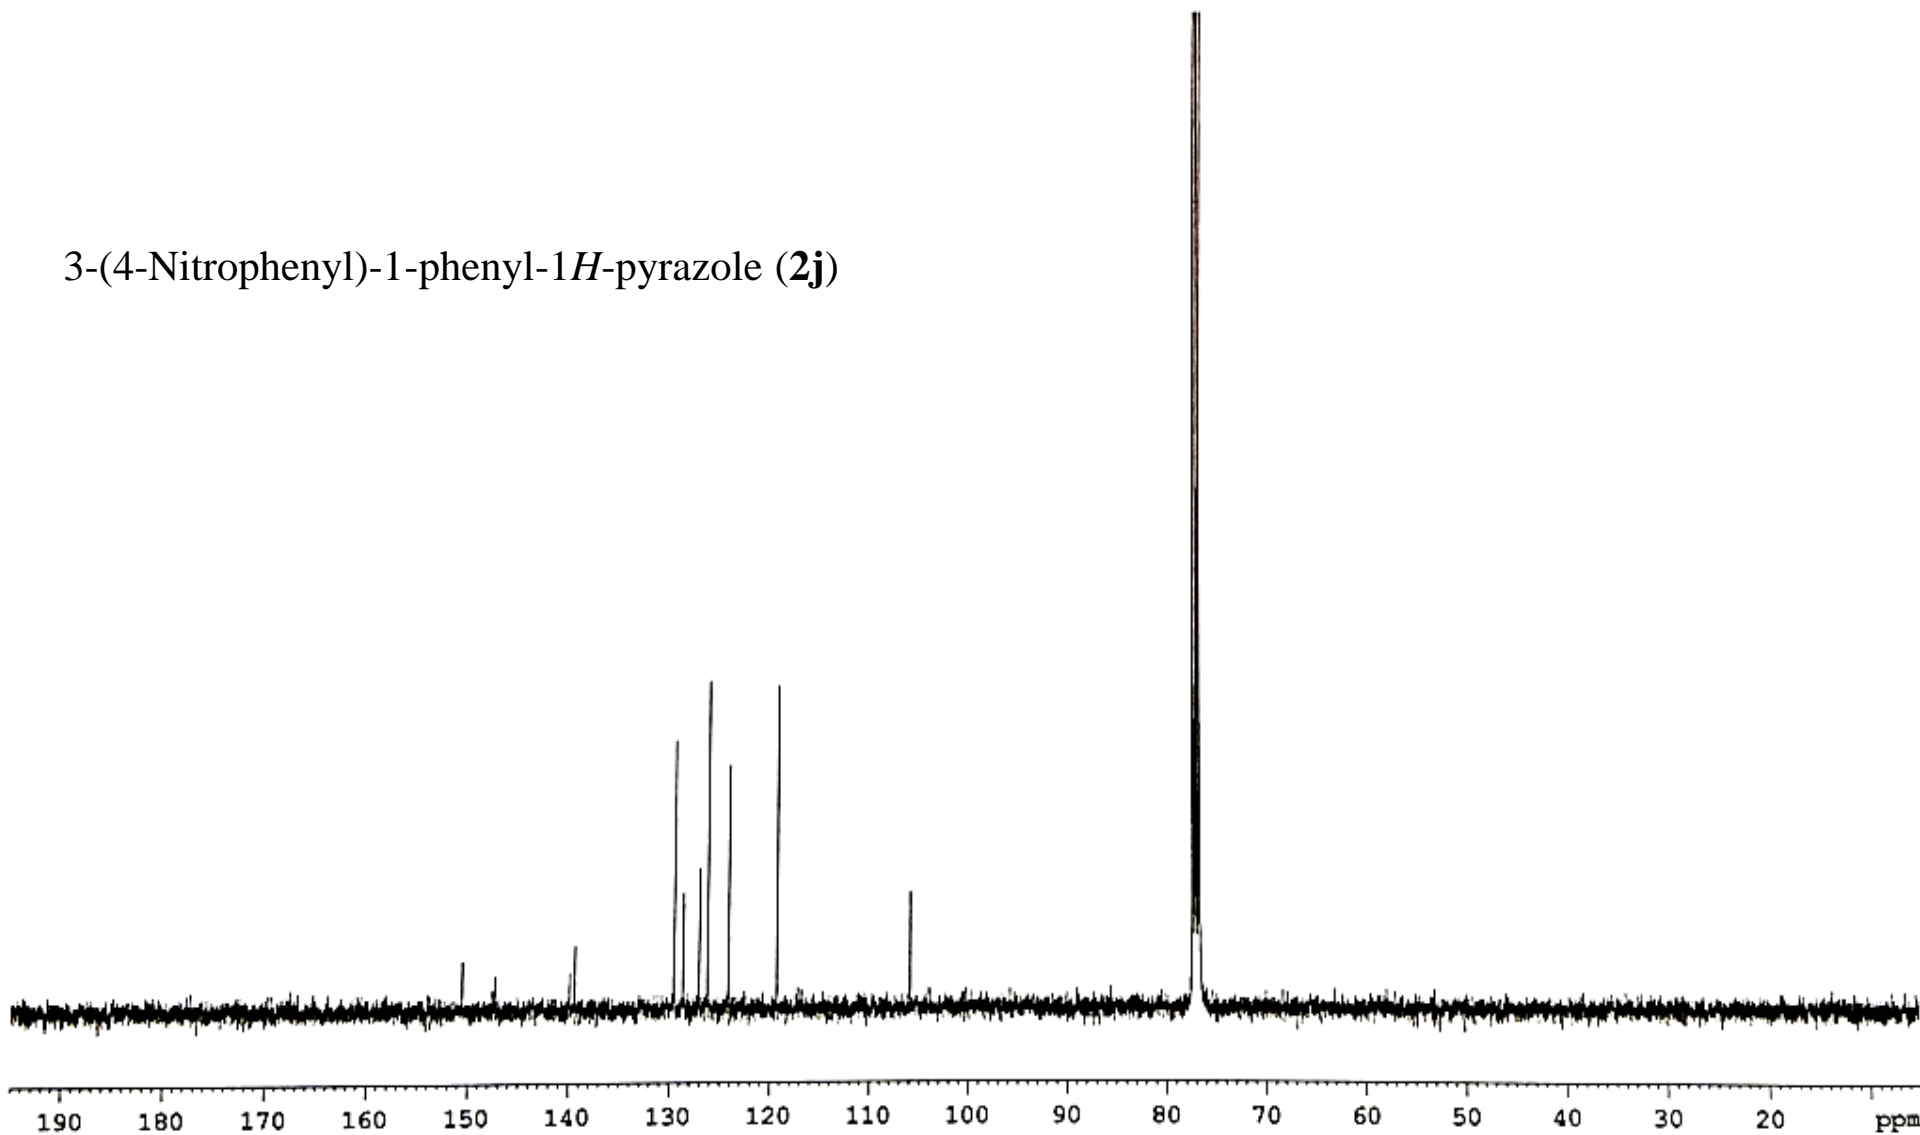

S35

8.770  
8.766  
8.761  
8.292  
8.290  
8.273  
8.271  
8.217  
8.215  
8.212  
8.197  
8.194  
8.191  
8.039  
8.033  
7.822  
7.820  
7.801  
7.639  
7.620  
7.599  
7.542  
7.523  
7.502  
7.378  
7.360  
7.341  
7.284  
6.888  
6.881

3-(3-Nitrophenyl)-1-phenyl-1*H*-pyrazole (**2k**)

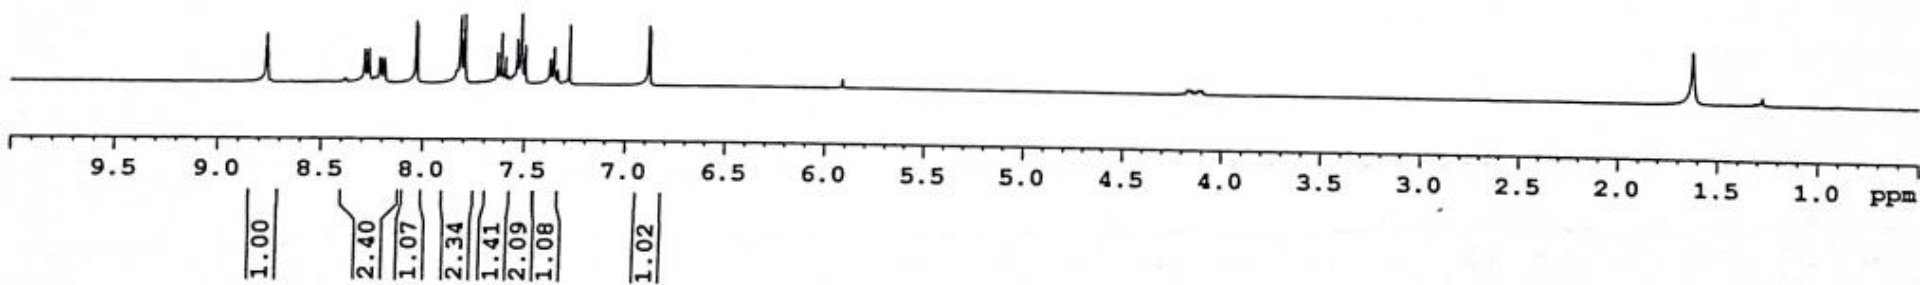

150.55  
148.74  
139.92  
134.98  
131.53  
129.60  
129.55  
128.55  
126.89  
122.55  
120.64  
119.19  
— 105.31  
77.34  
77.02  
76.71

3-(3-nitrophenyl)-1-phenyl-1*H*-pyrazole (**2k**)

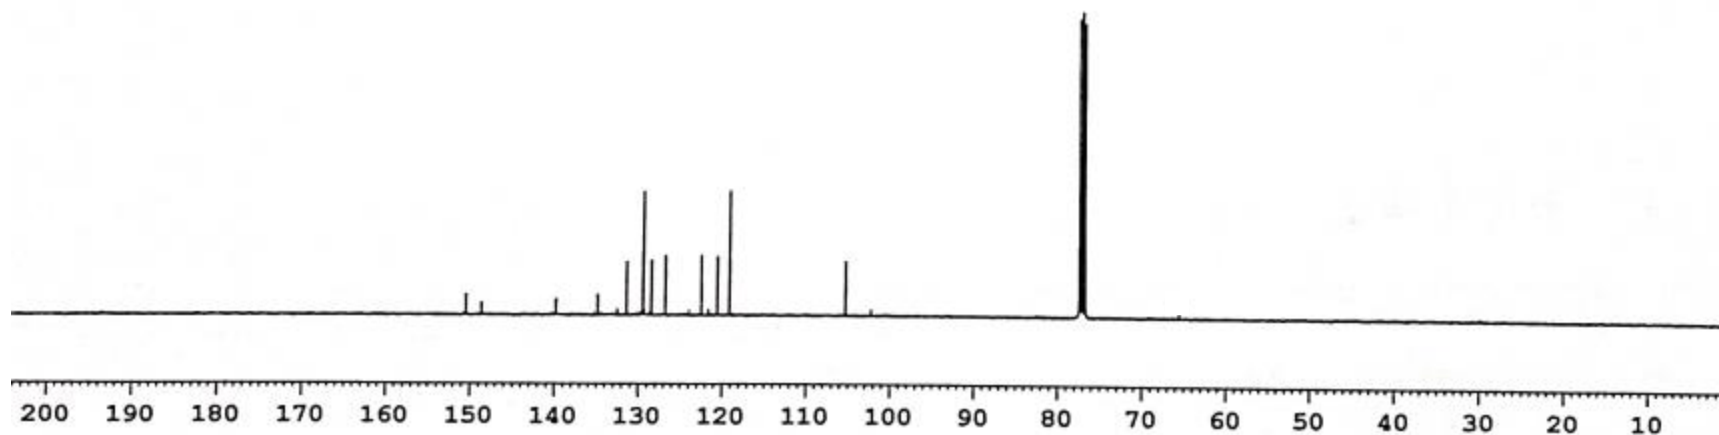

S37

7.996  
7.990  
7.872  
7.870  
7.853  
7.850  
7.783  
7.781  
7.763  
7.760  
7.754  
7.751  
7.732  
7.659  
7.657  
7.641  
7.638  
7.621  
7.618  
7.524  
7.521  
7.505  
7.486  
7.466  
7.348  
7.330  
7.311  
7.284  
6.646  
6.640

3-(2-Nitrophenyl)-1-phenyl-1*H*-pyrazole (**2l**)

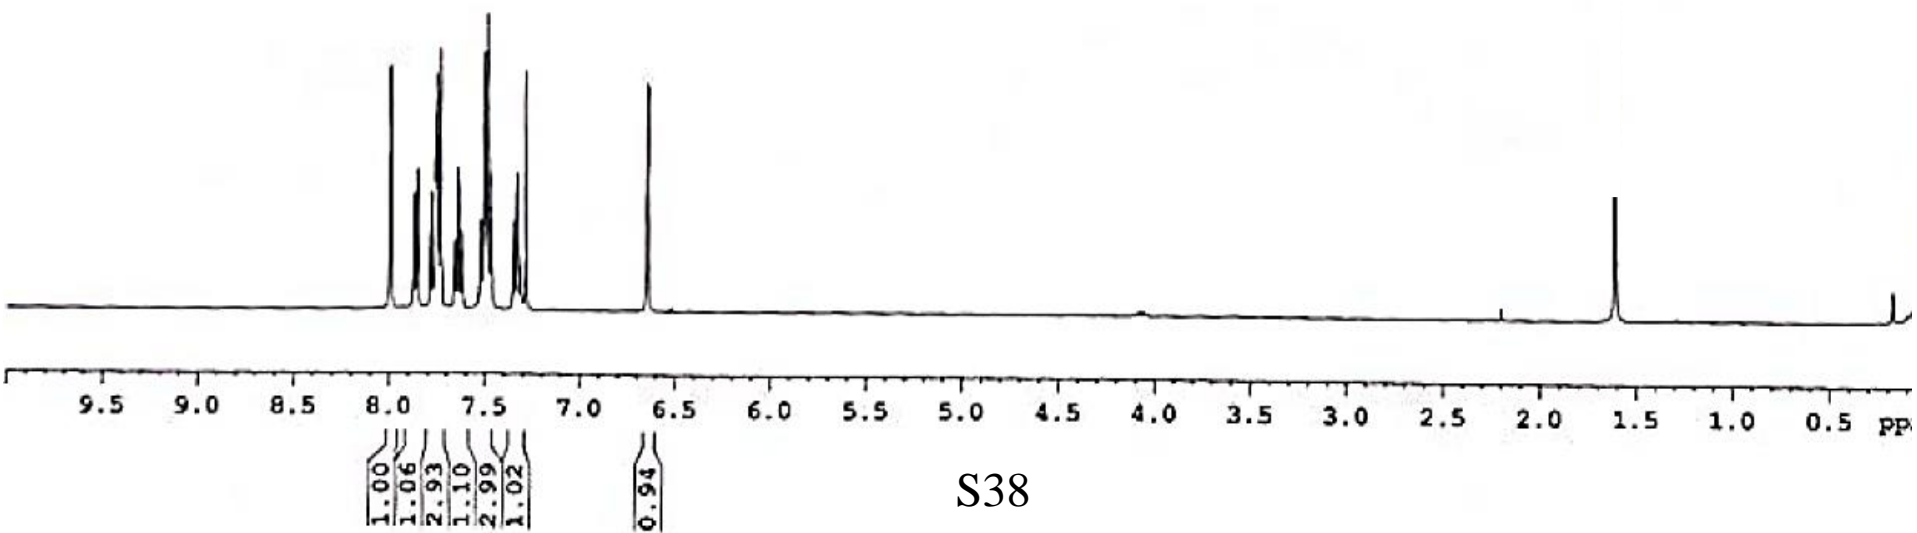

S38

3-(2-Nitrophenyl)-1-phenyl-1*H*-pyrazole (**21**)

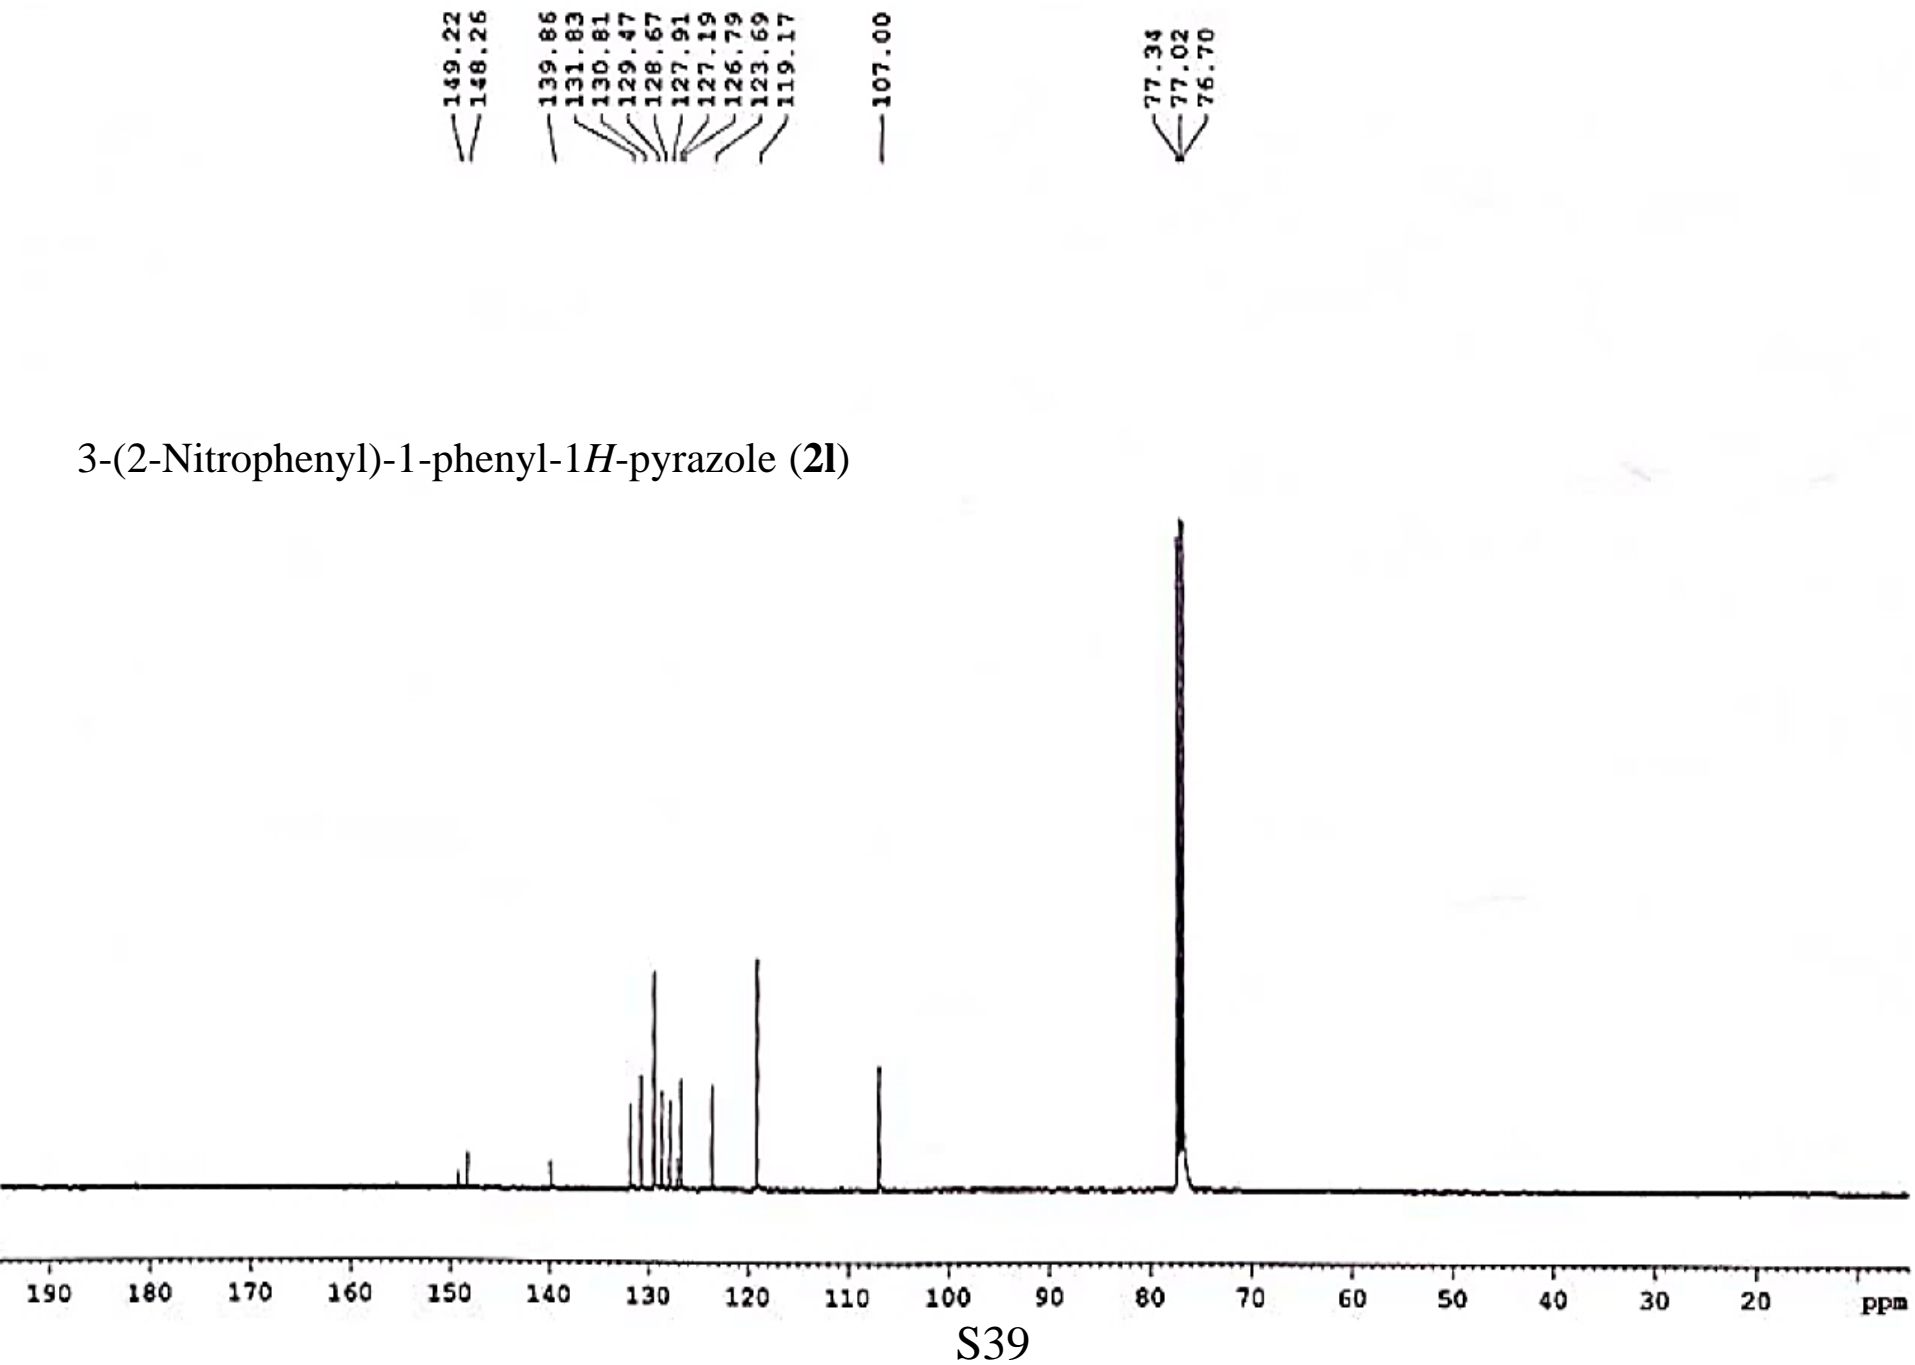

1-Phenyl-3-(thiophen-2-yl)-1*H*-pyrazole (**2m**)

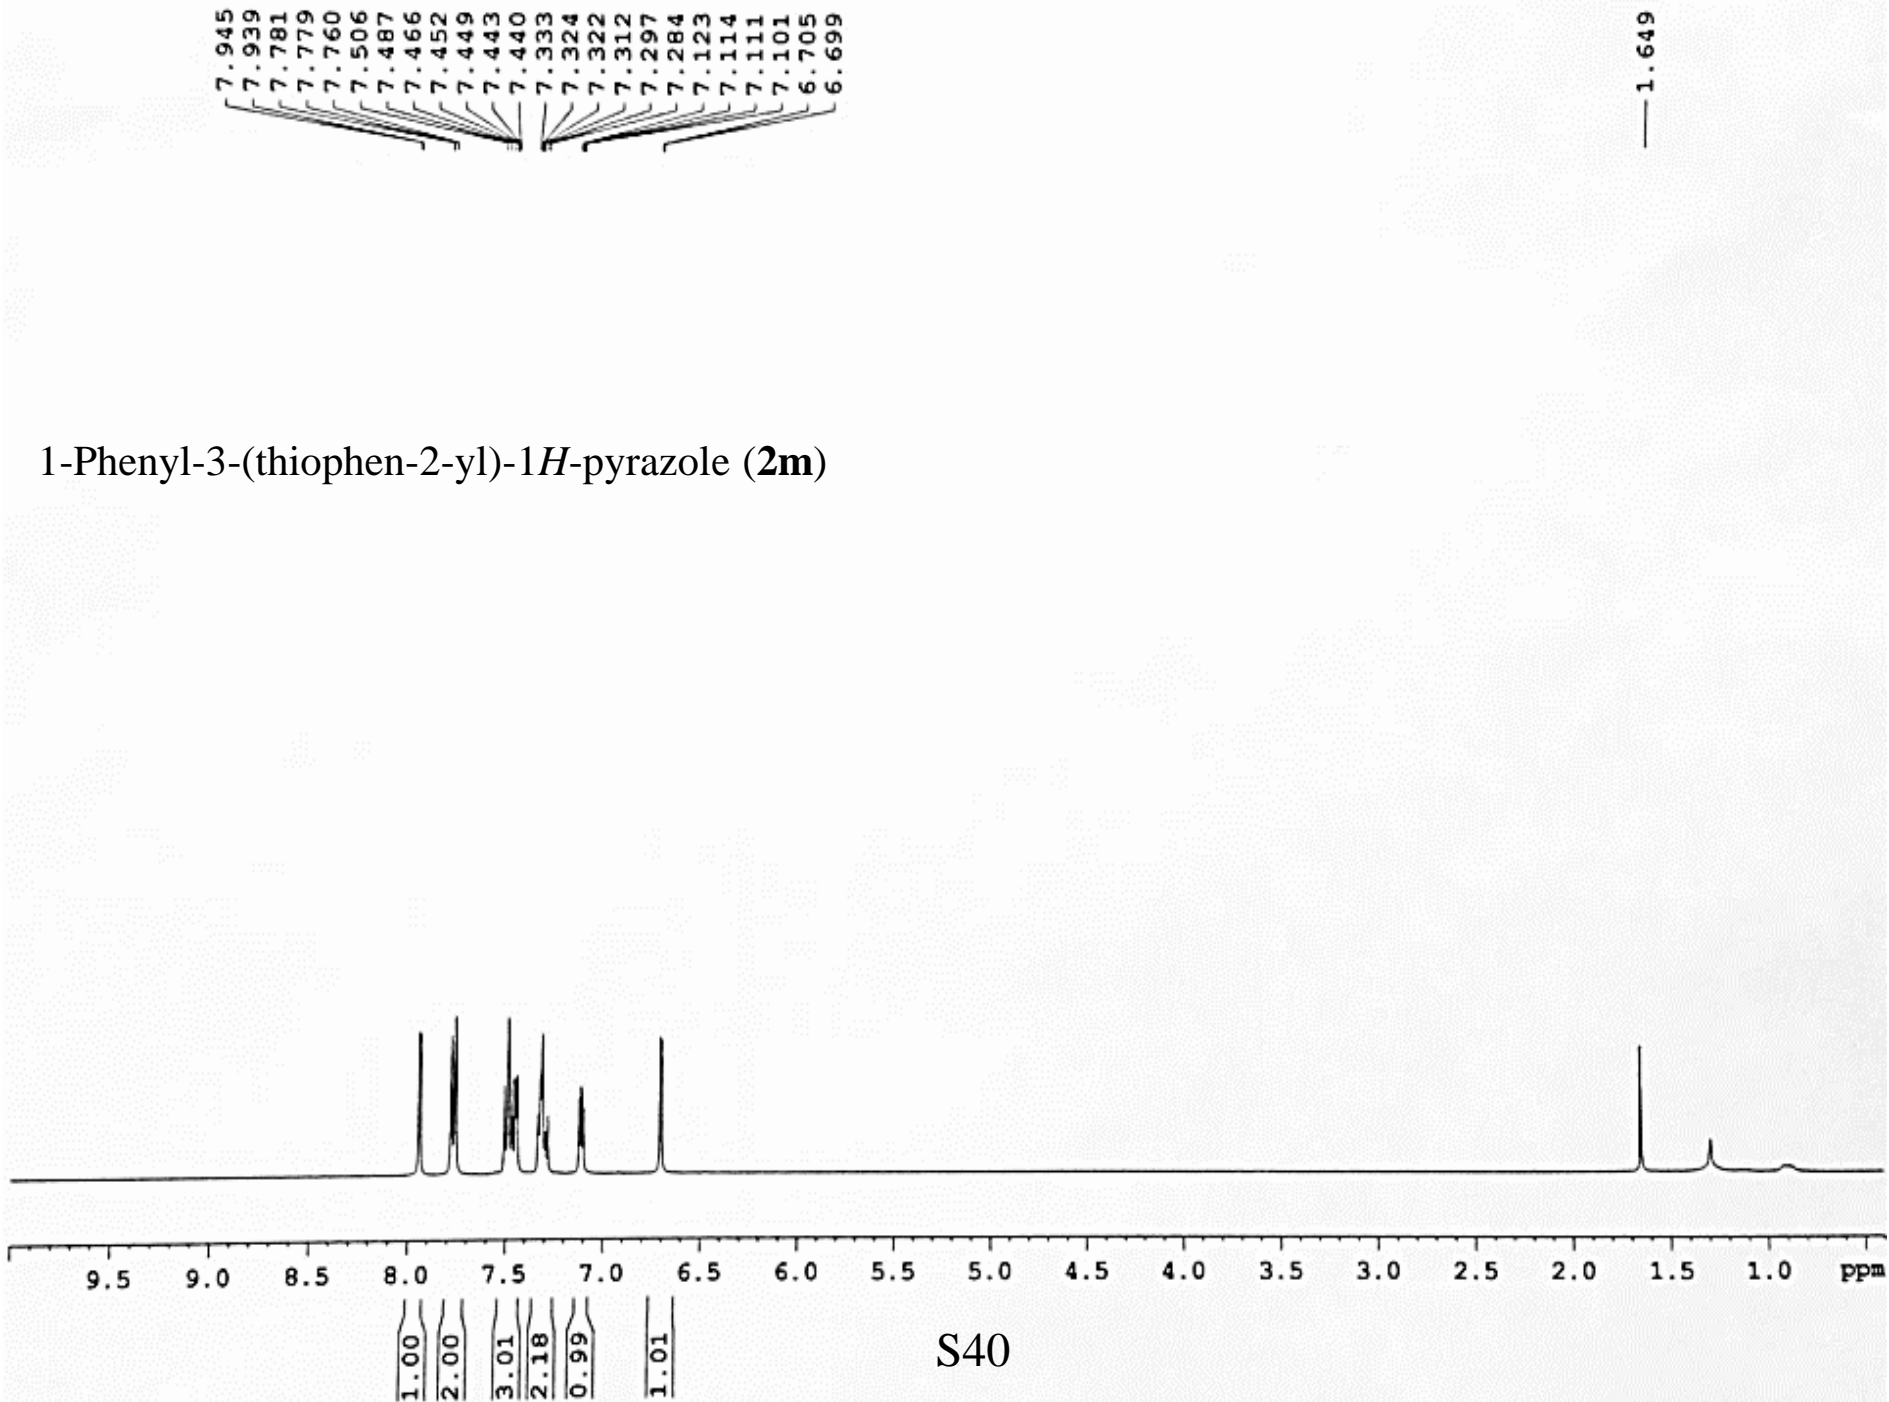



1-Phenyl-3-(thiophen-2-yl)-1*H*-pyrazole (**2m**)

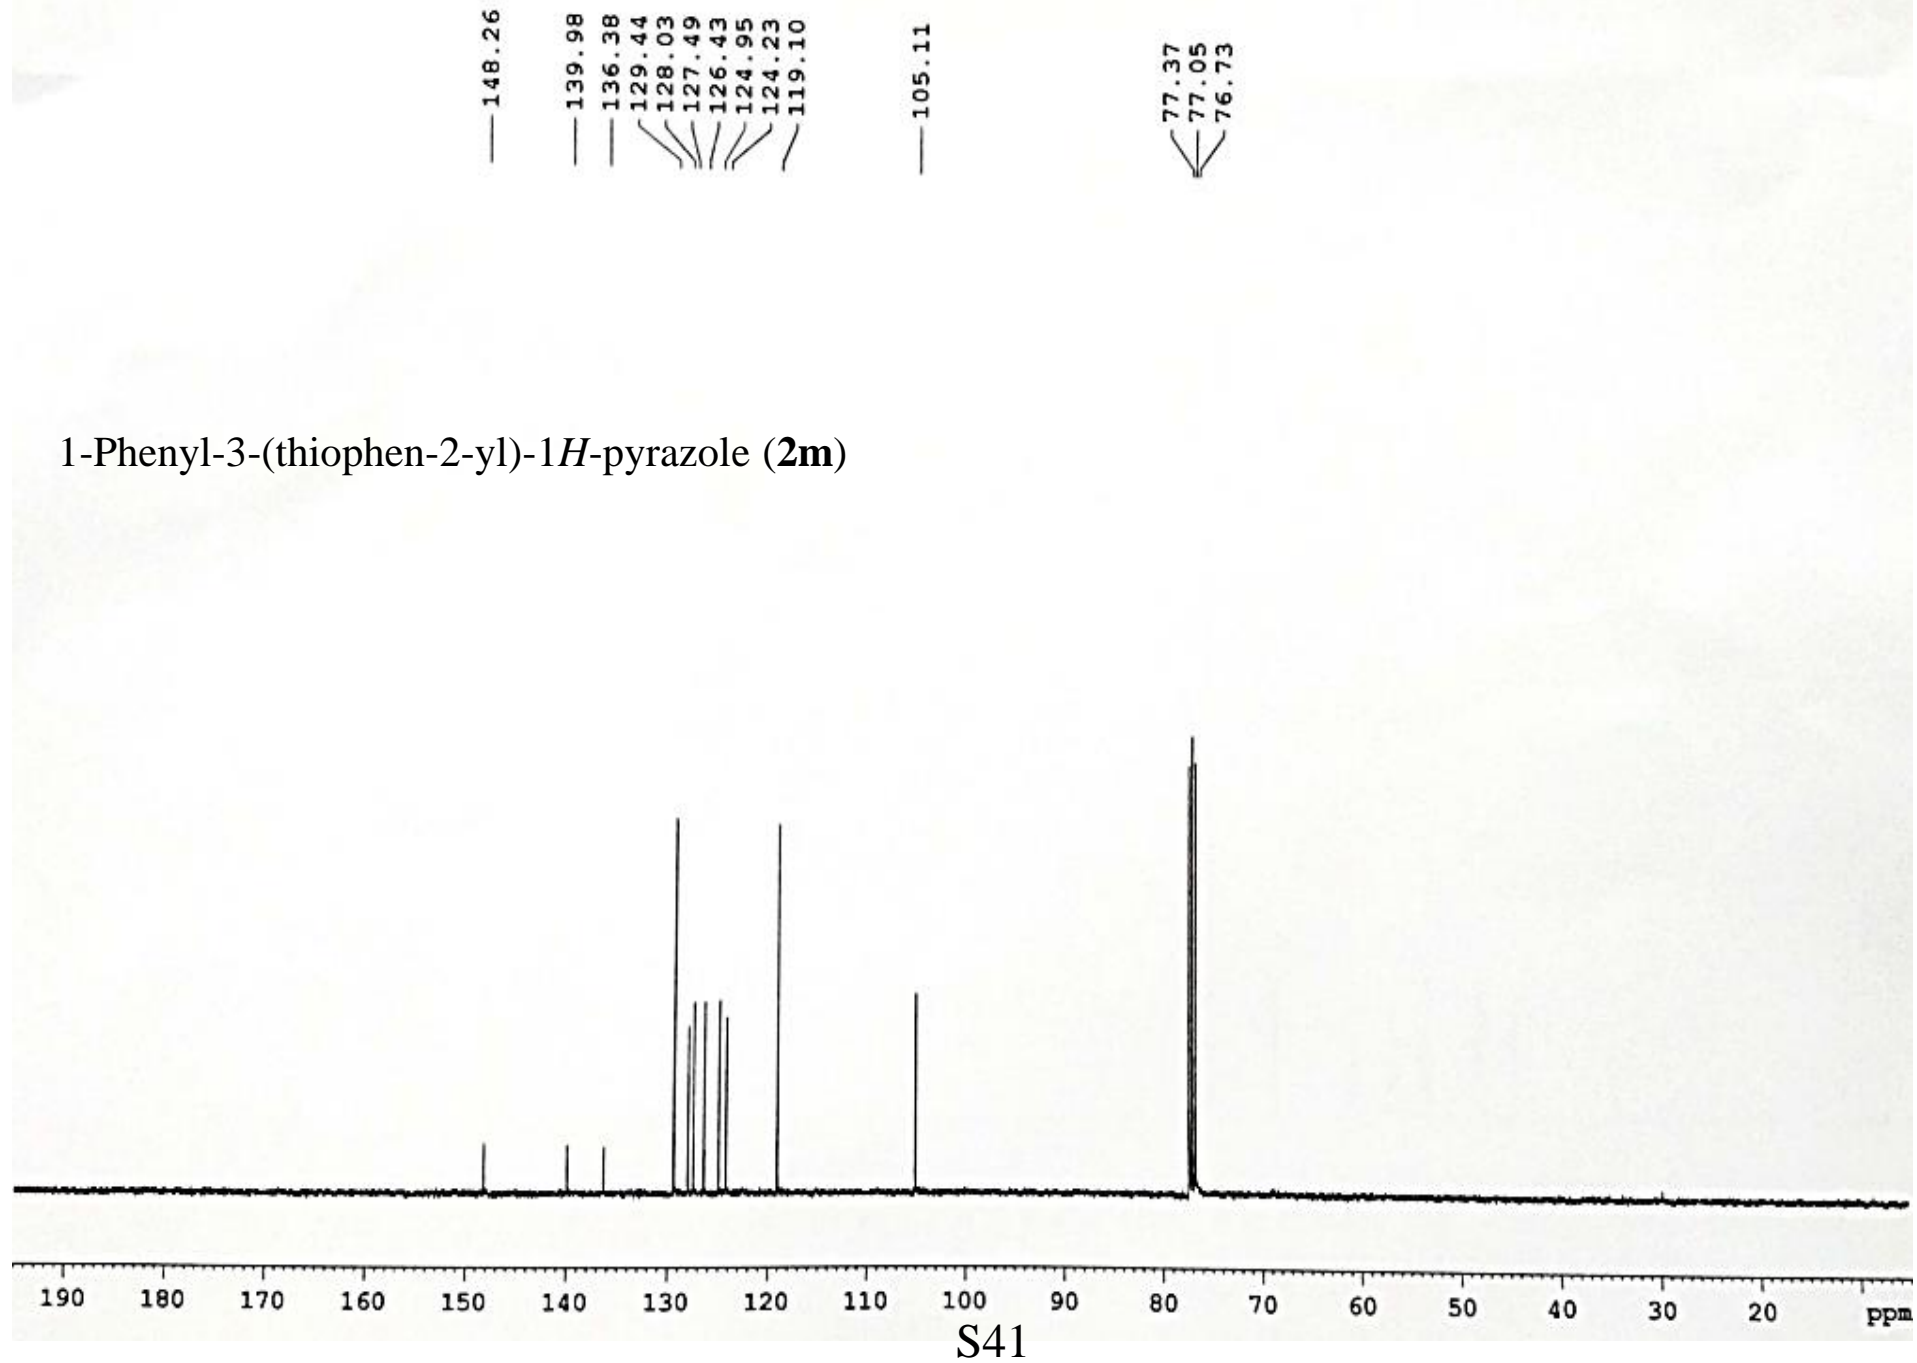

3-Phenyl-1-p-tolyl-1H-pyrazole (**2n**)

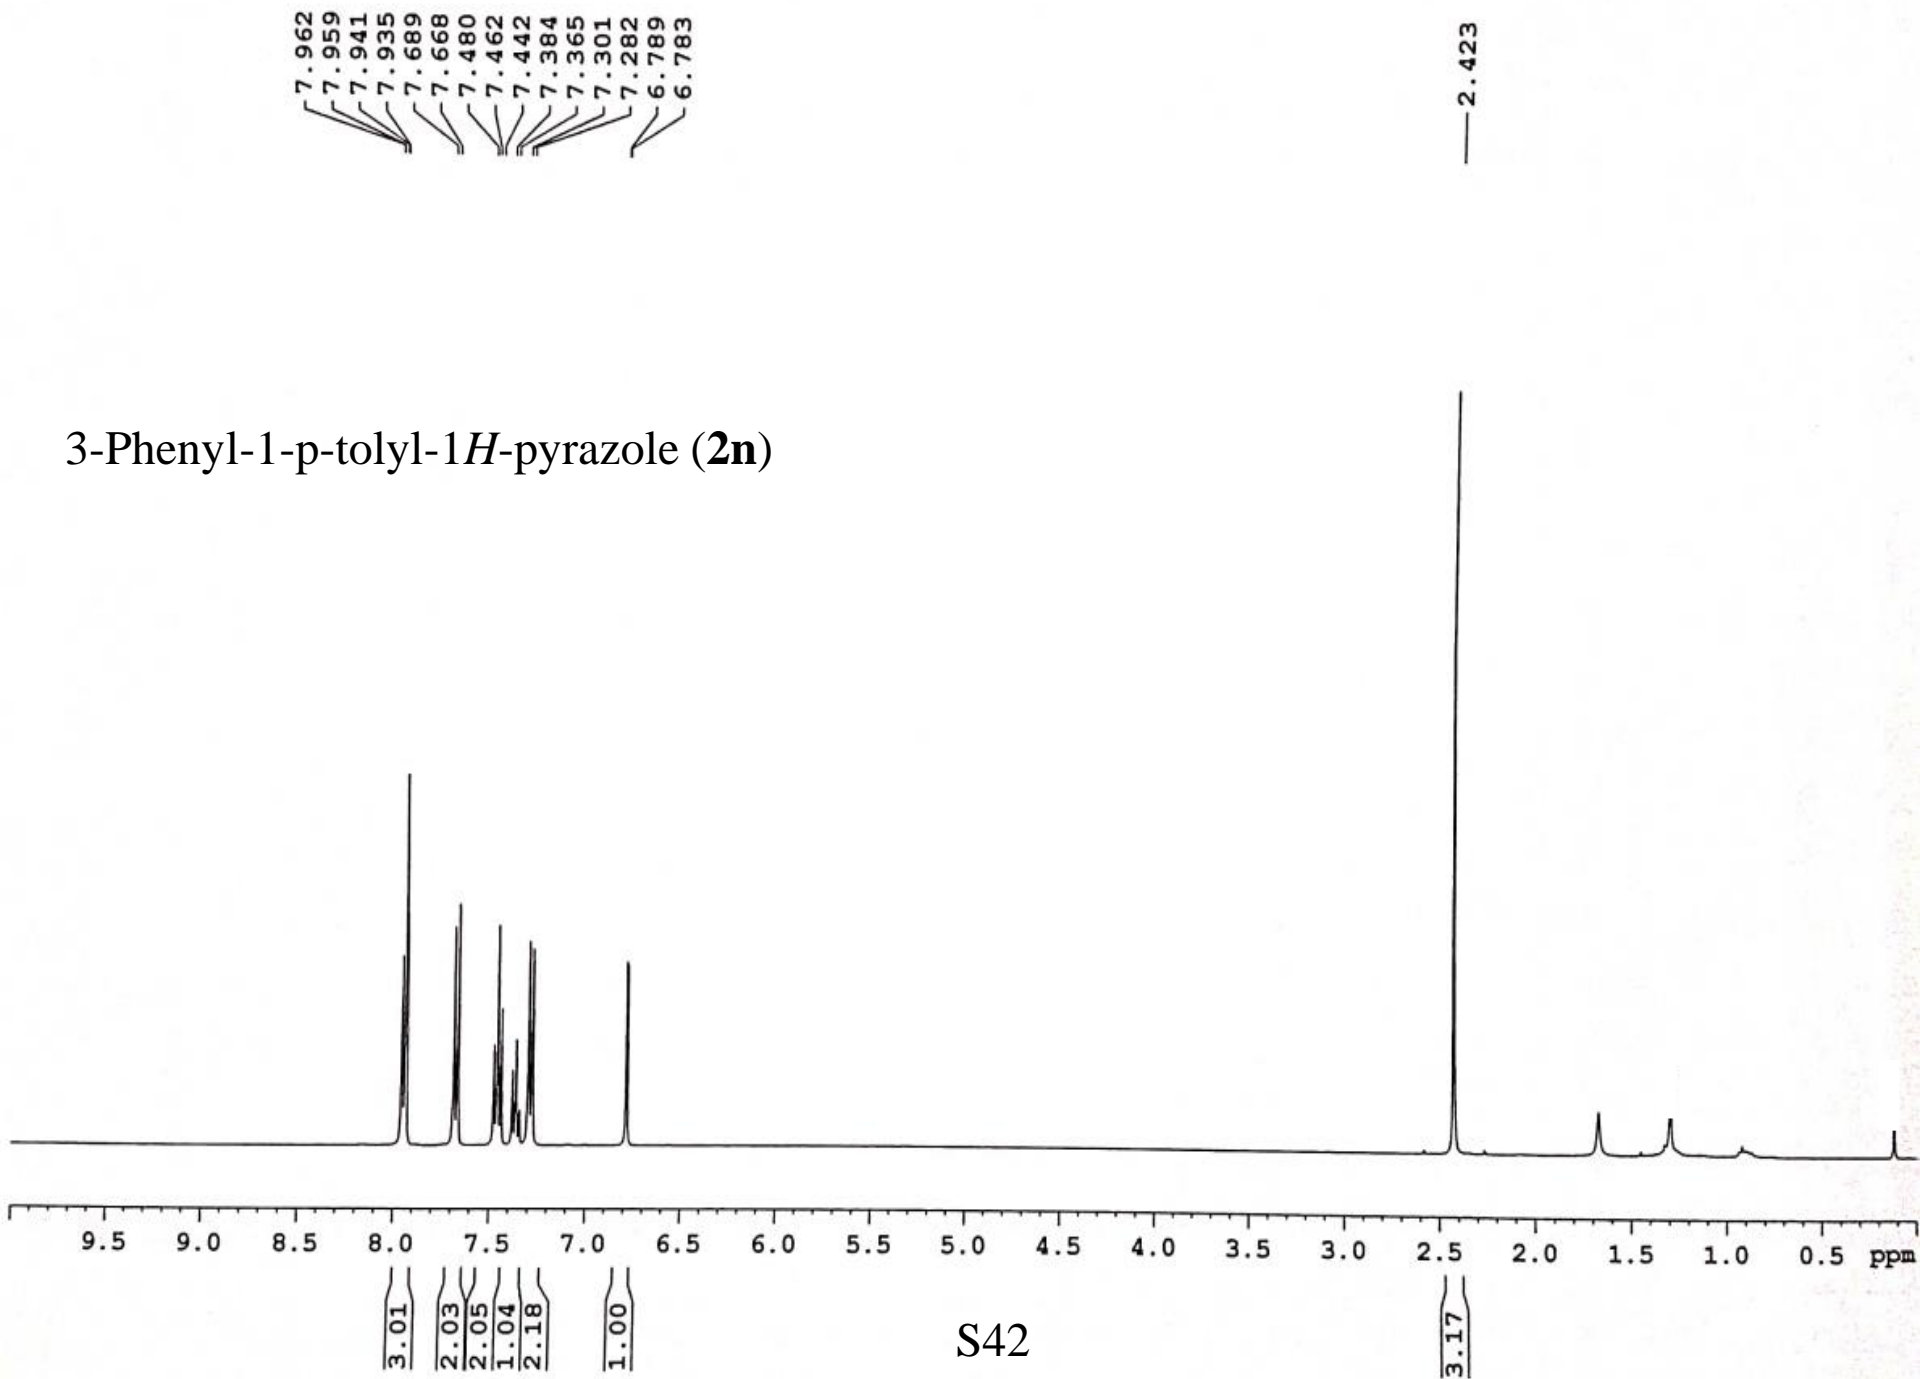

3-Phenyl-1-p-tolyl-1*H*-pyrazole (**2n**)

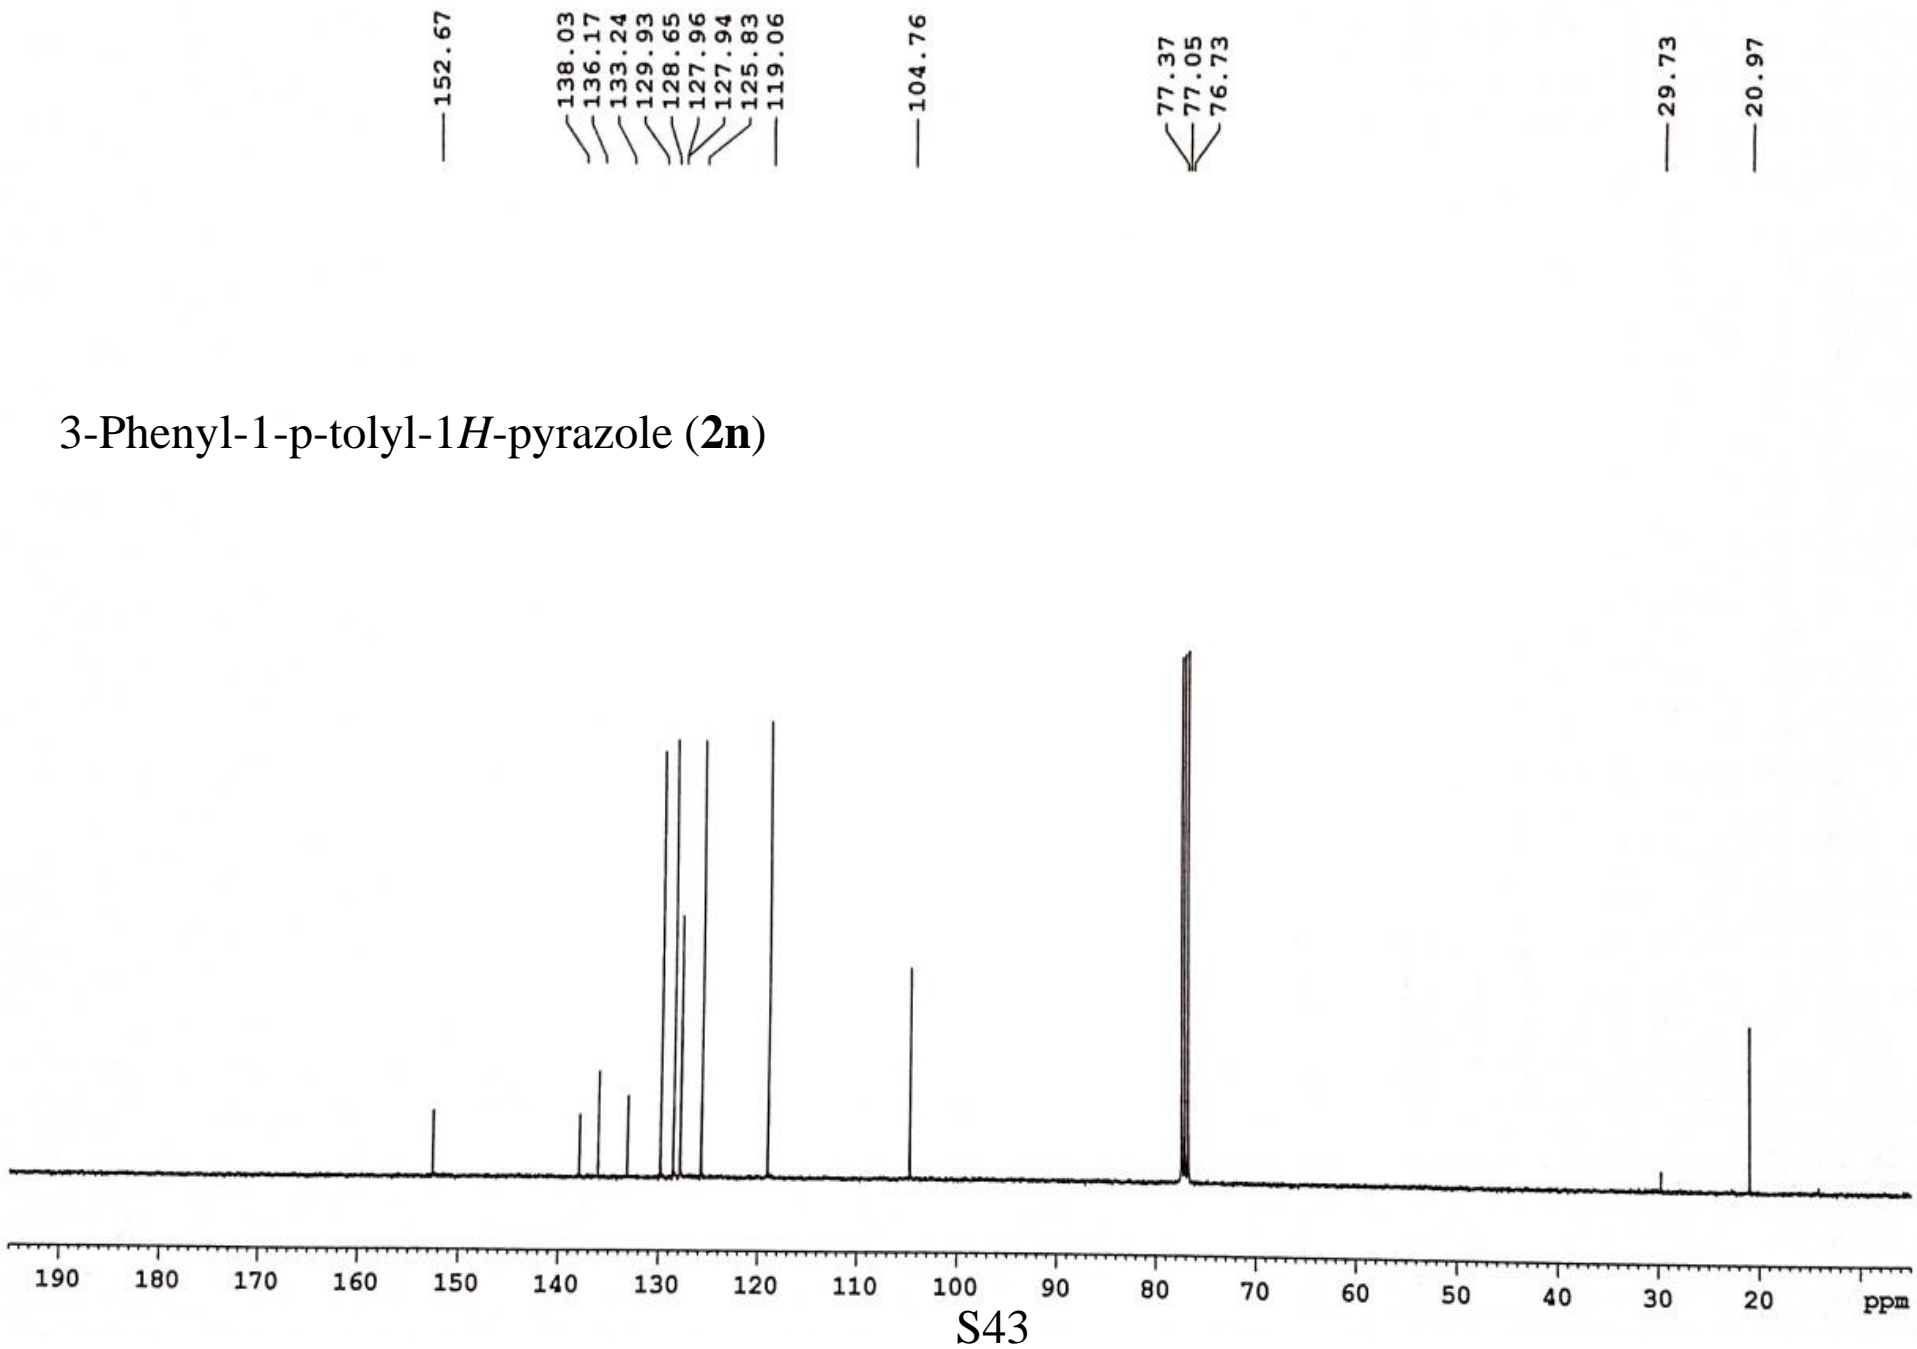

1,3-Di-p-tolyl-1H-pyrazole (**2o**)

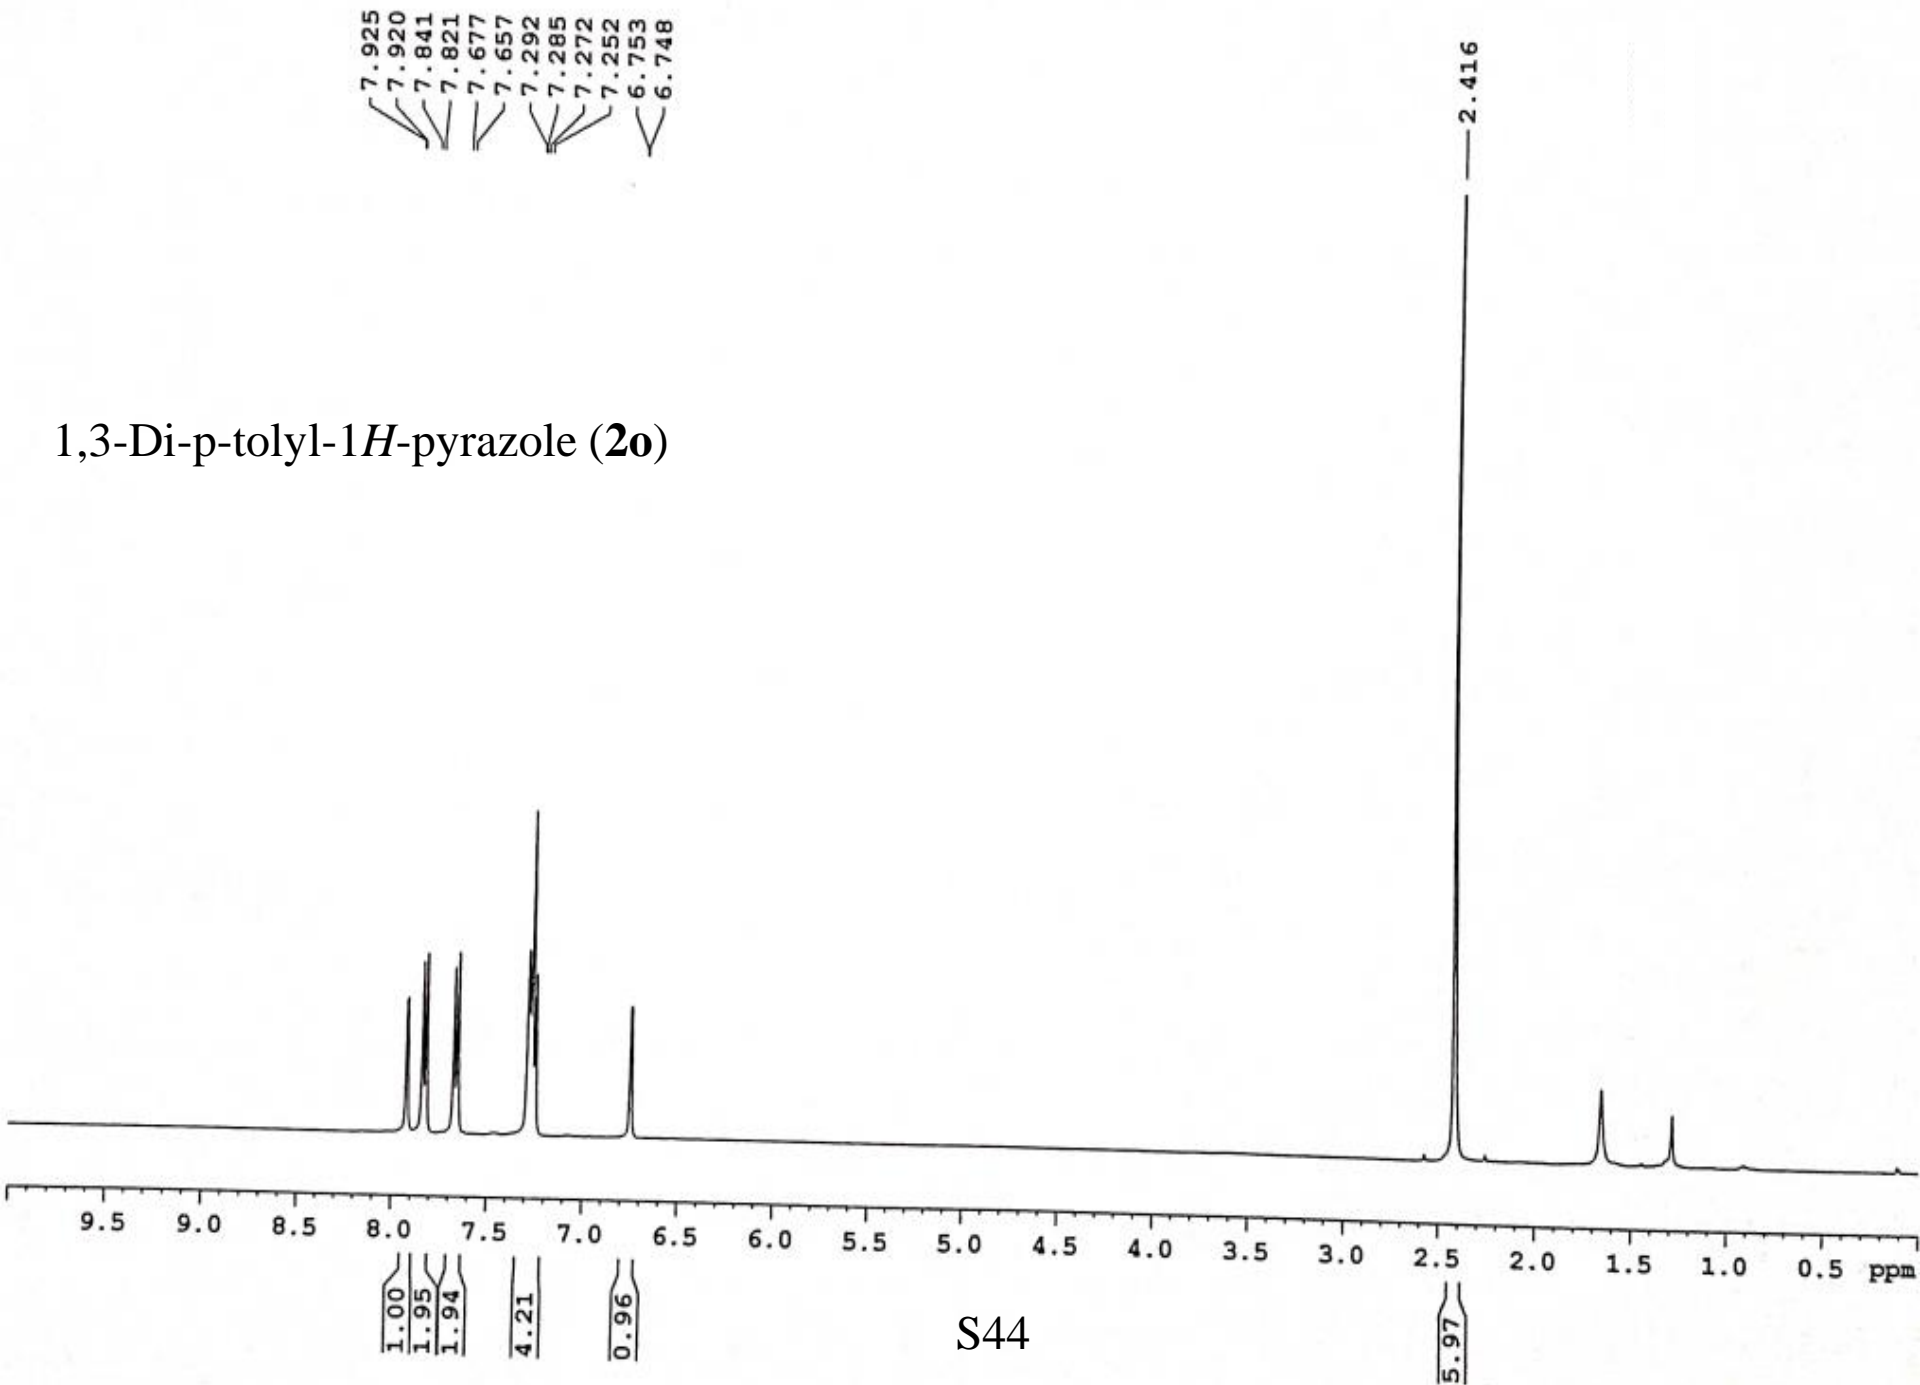

— 152.74  
138.06  
137.72  
136.05  
130.42  
129.91  
129.34  
127.86  
125.72  
119.03  
— 104.57  
77.35  
77.04  
76.72  
21.33  
20.96

1,3-Di-p-tolyl-1*H*-pyrazole (2o)

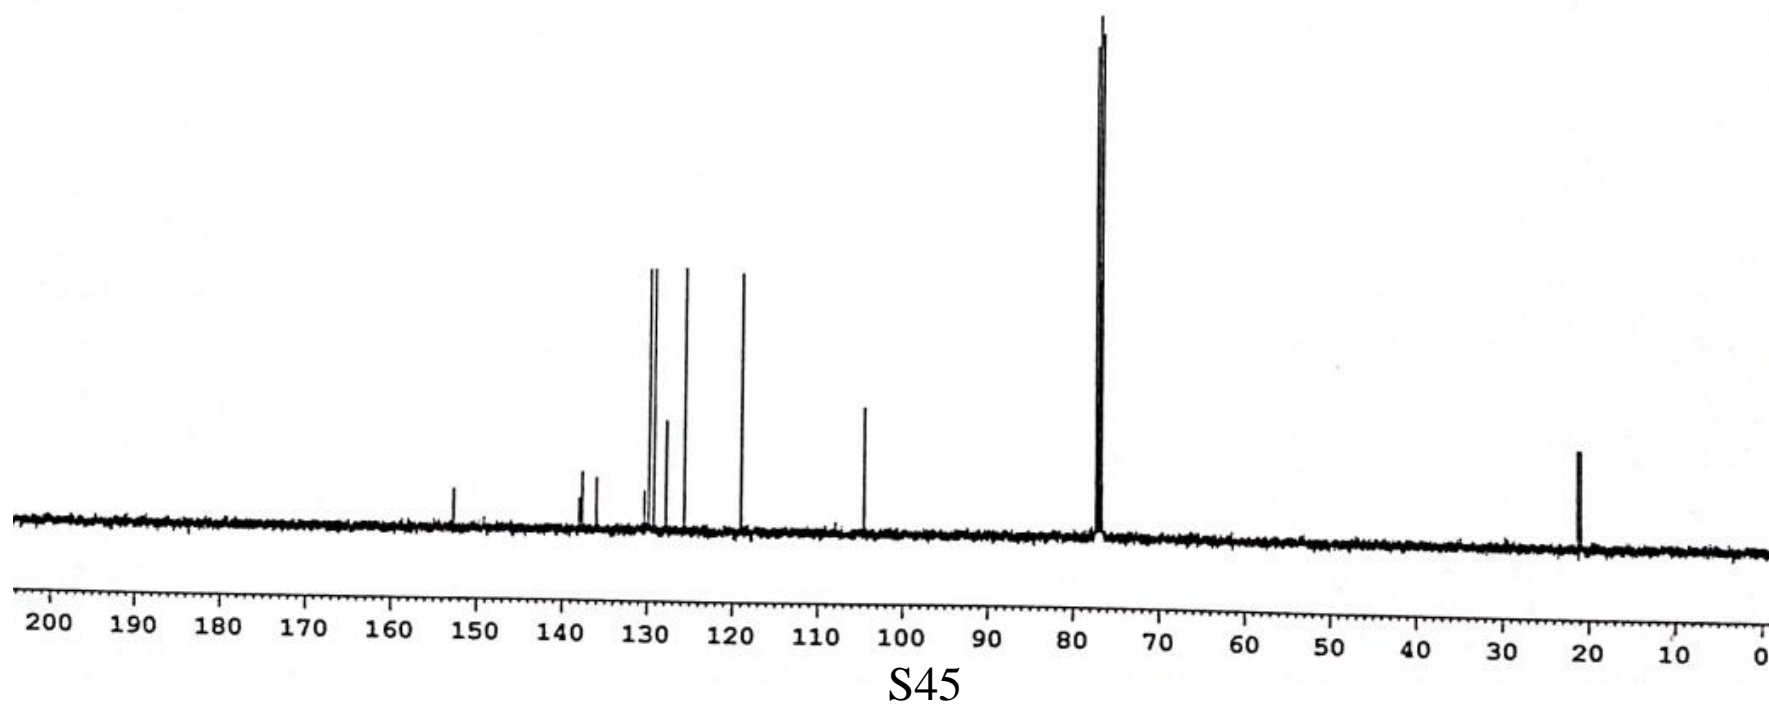

3-(4-Chlorophenyl)-1-p-tolyl-1H-pyrazole (**2q**)

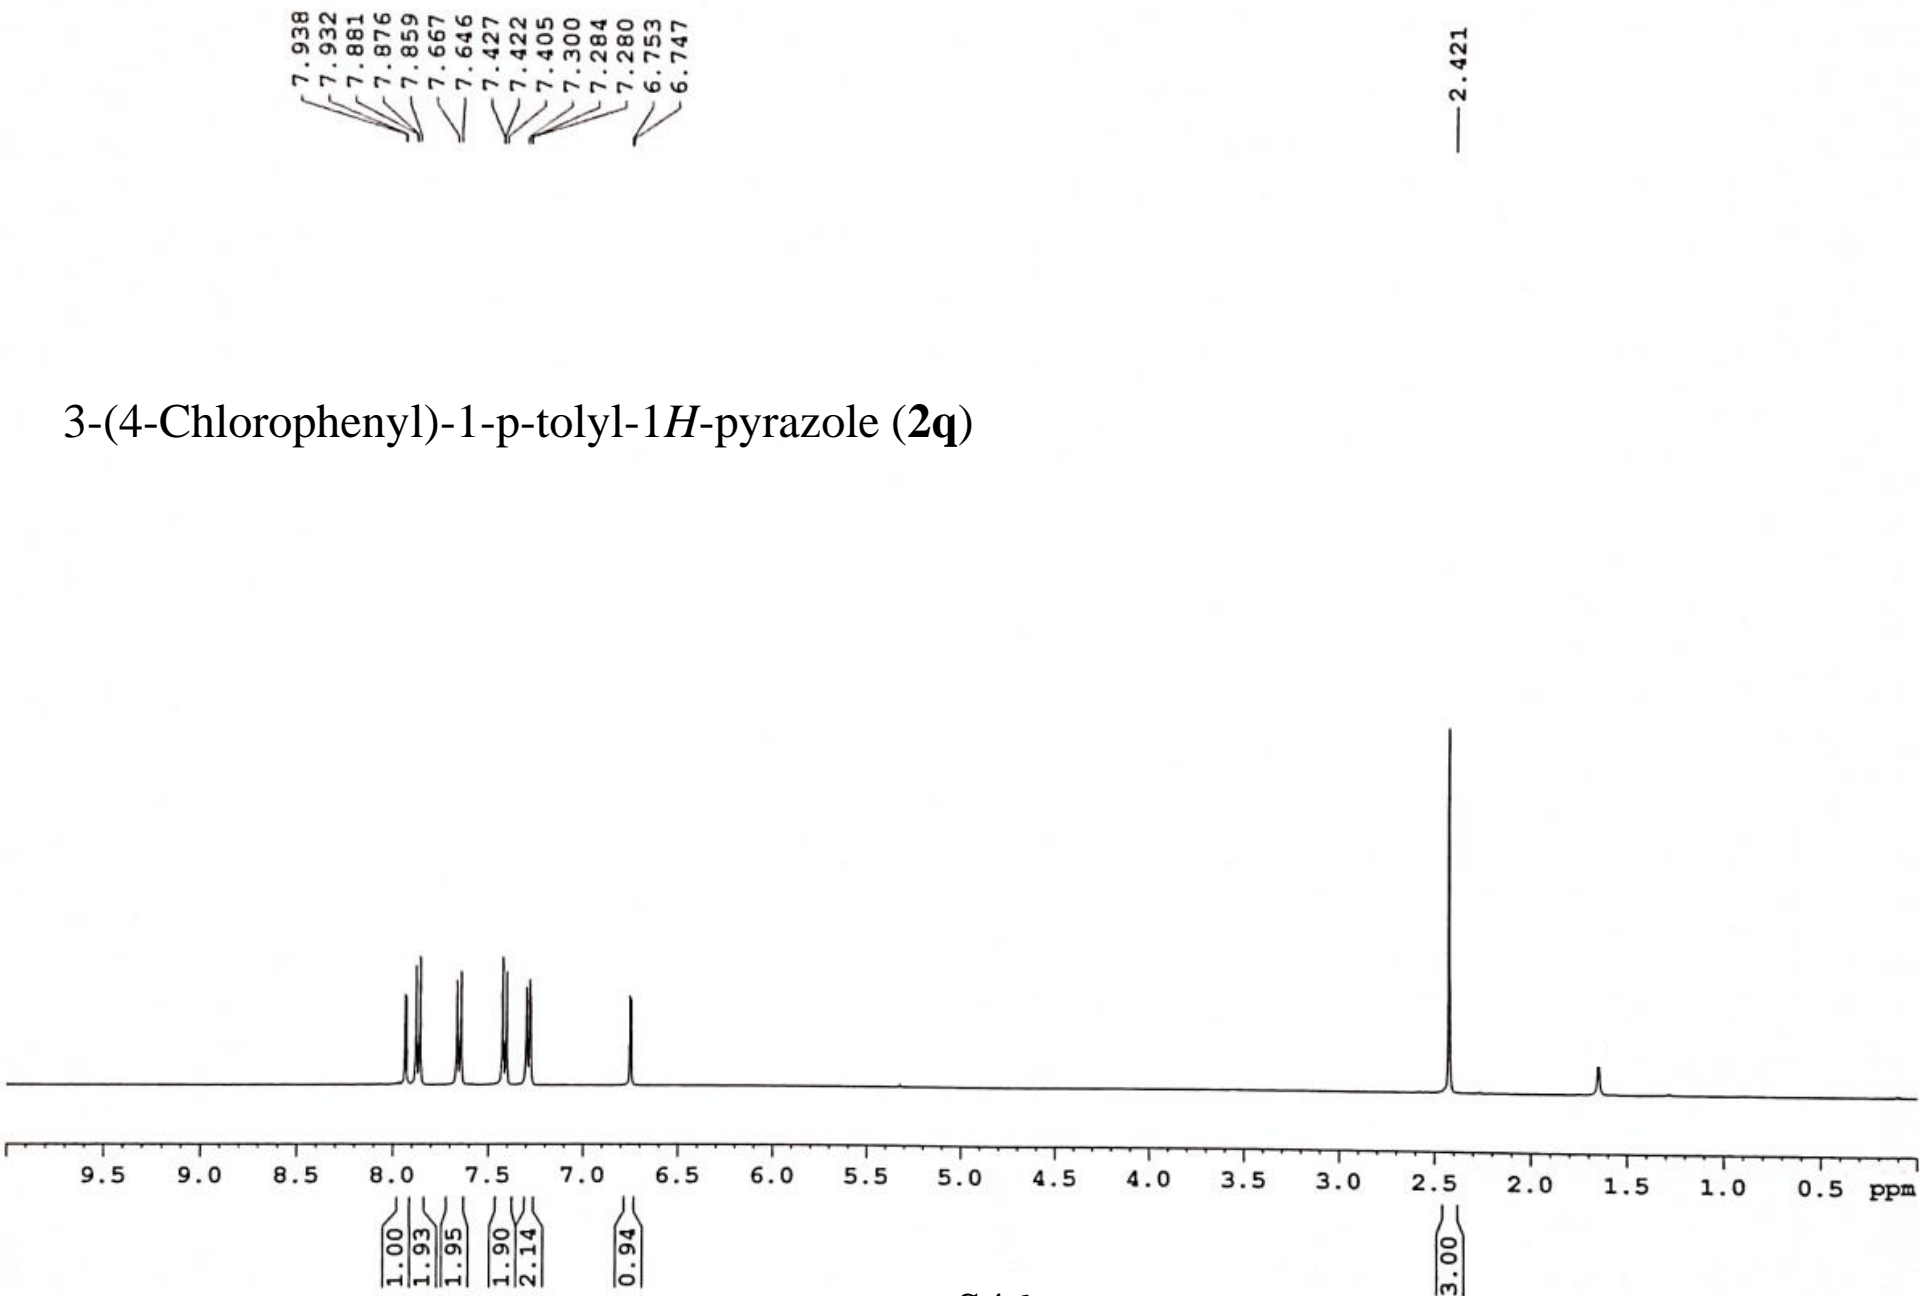

3-(4-Chlorophenyl)-1-p-tolyl-1*H*-pyrazole (**2q**)

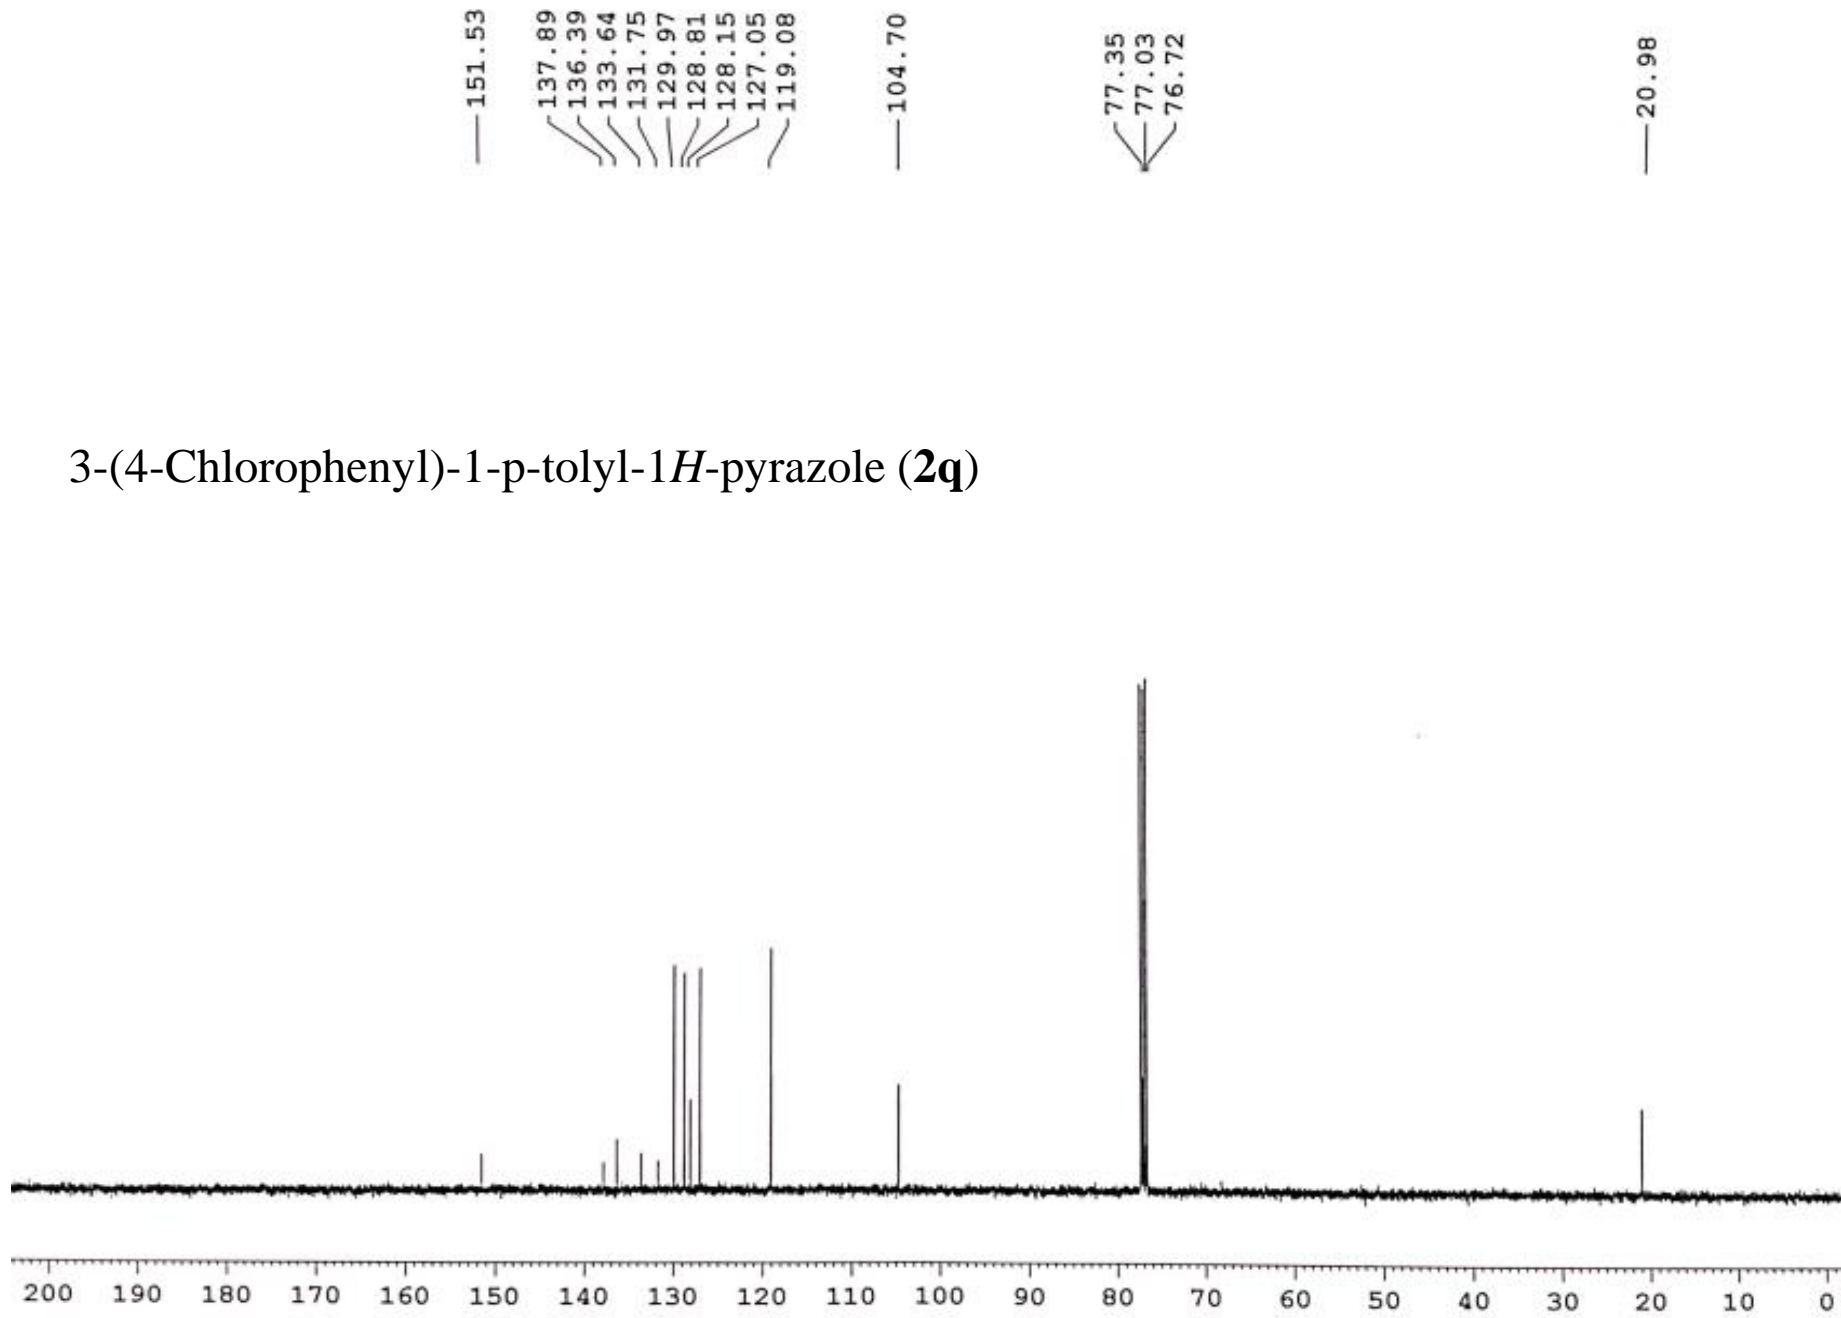

4-(1-p-tolyl-1*H*-pyrazol-3-yl)benzotrile (**2r**)

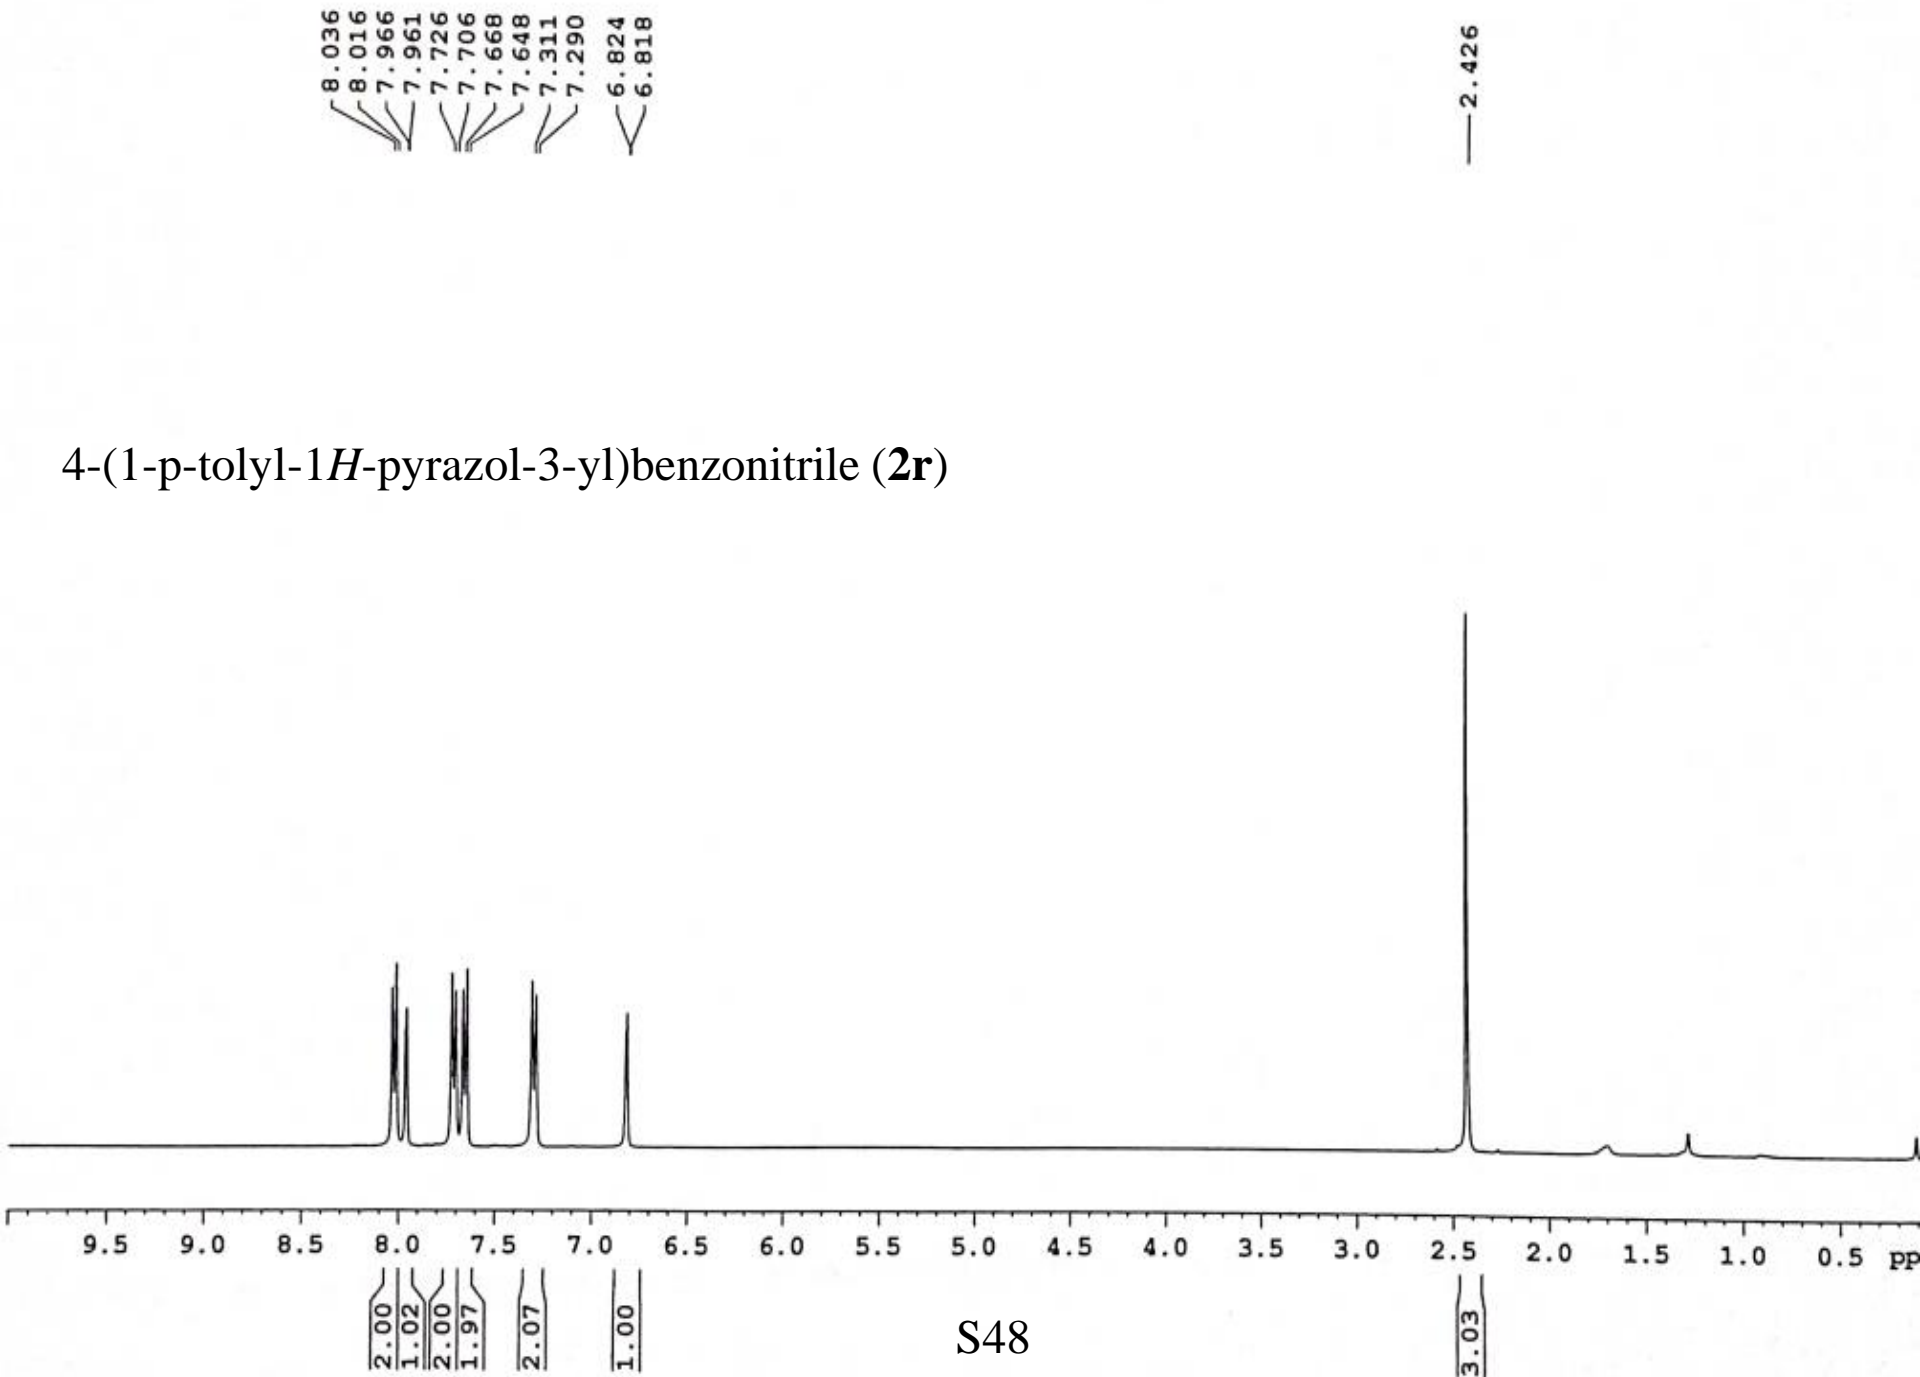



4-(1-p-tolyl-1*H*-pyrazol-3-yl)benzotrile (**2r**)

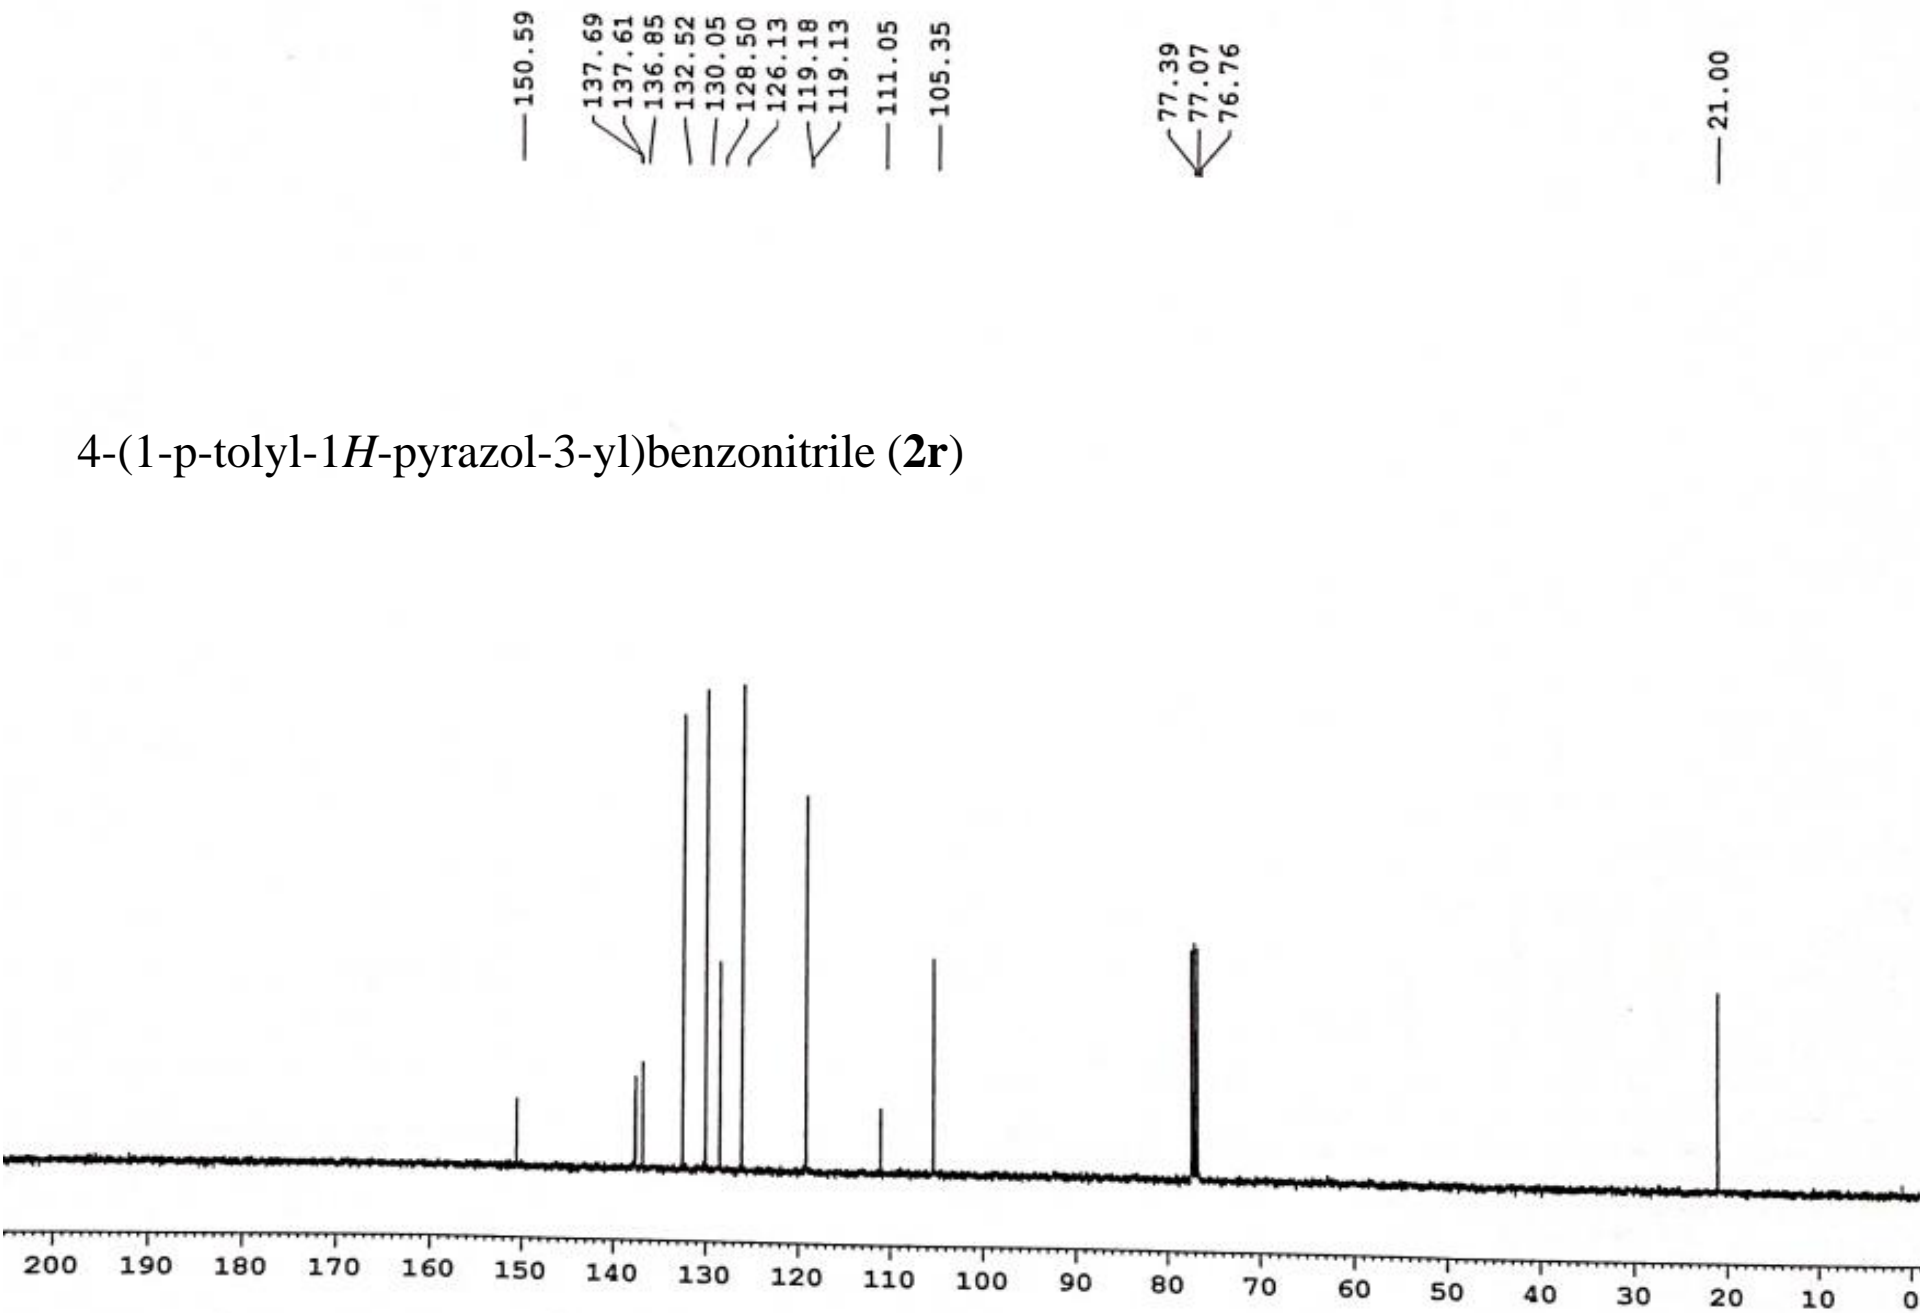

7.950  
7.944  
7.923  
7.764  
7.757  
7.752  
7.739  
7.734  
7.727  
7.482  
7.477  
7.469  
7.464  
7.452  
7.447  
7.394  
7.392  
7.381  
7.376  
7.358  
7.284  
6.814  
6.807

1-(4-Chlorophenyl)-3-phenyl-1*H*-pyrazole (**2s**)

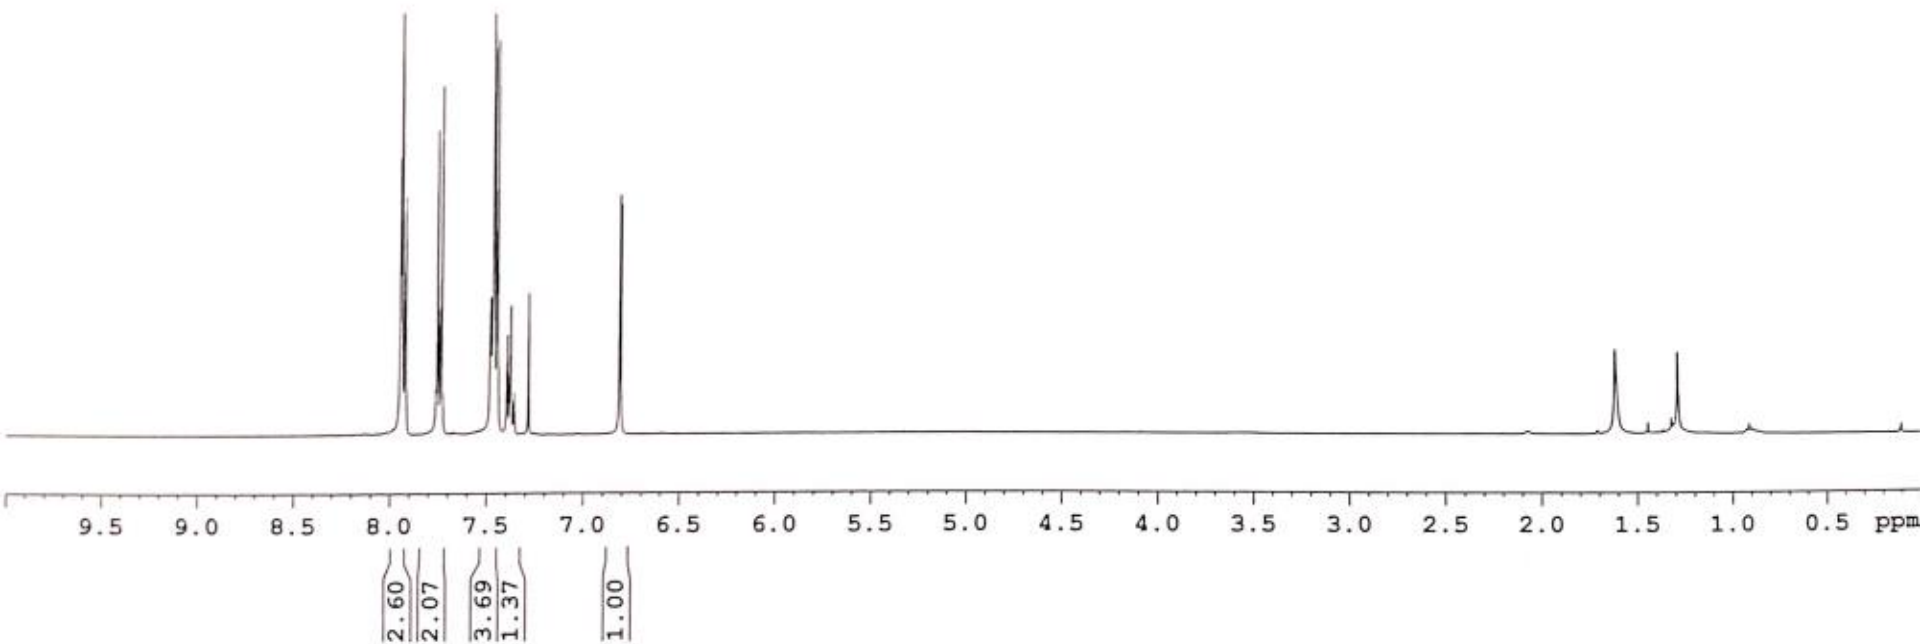

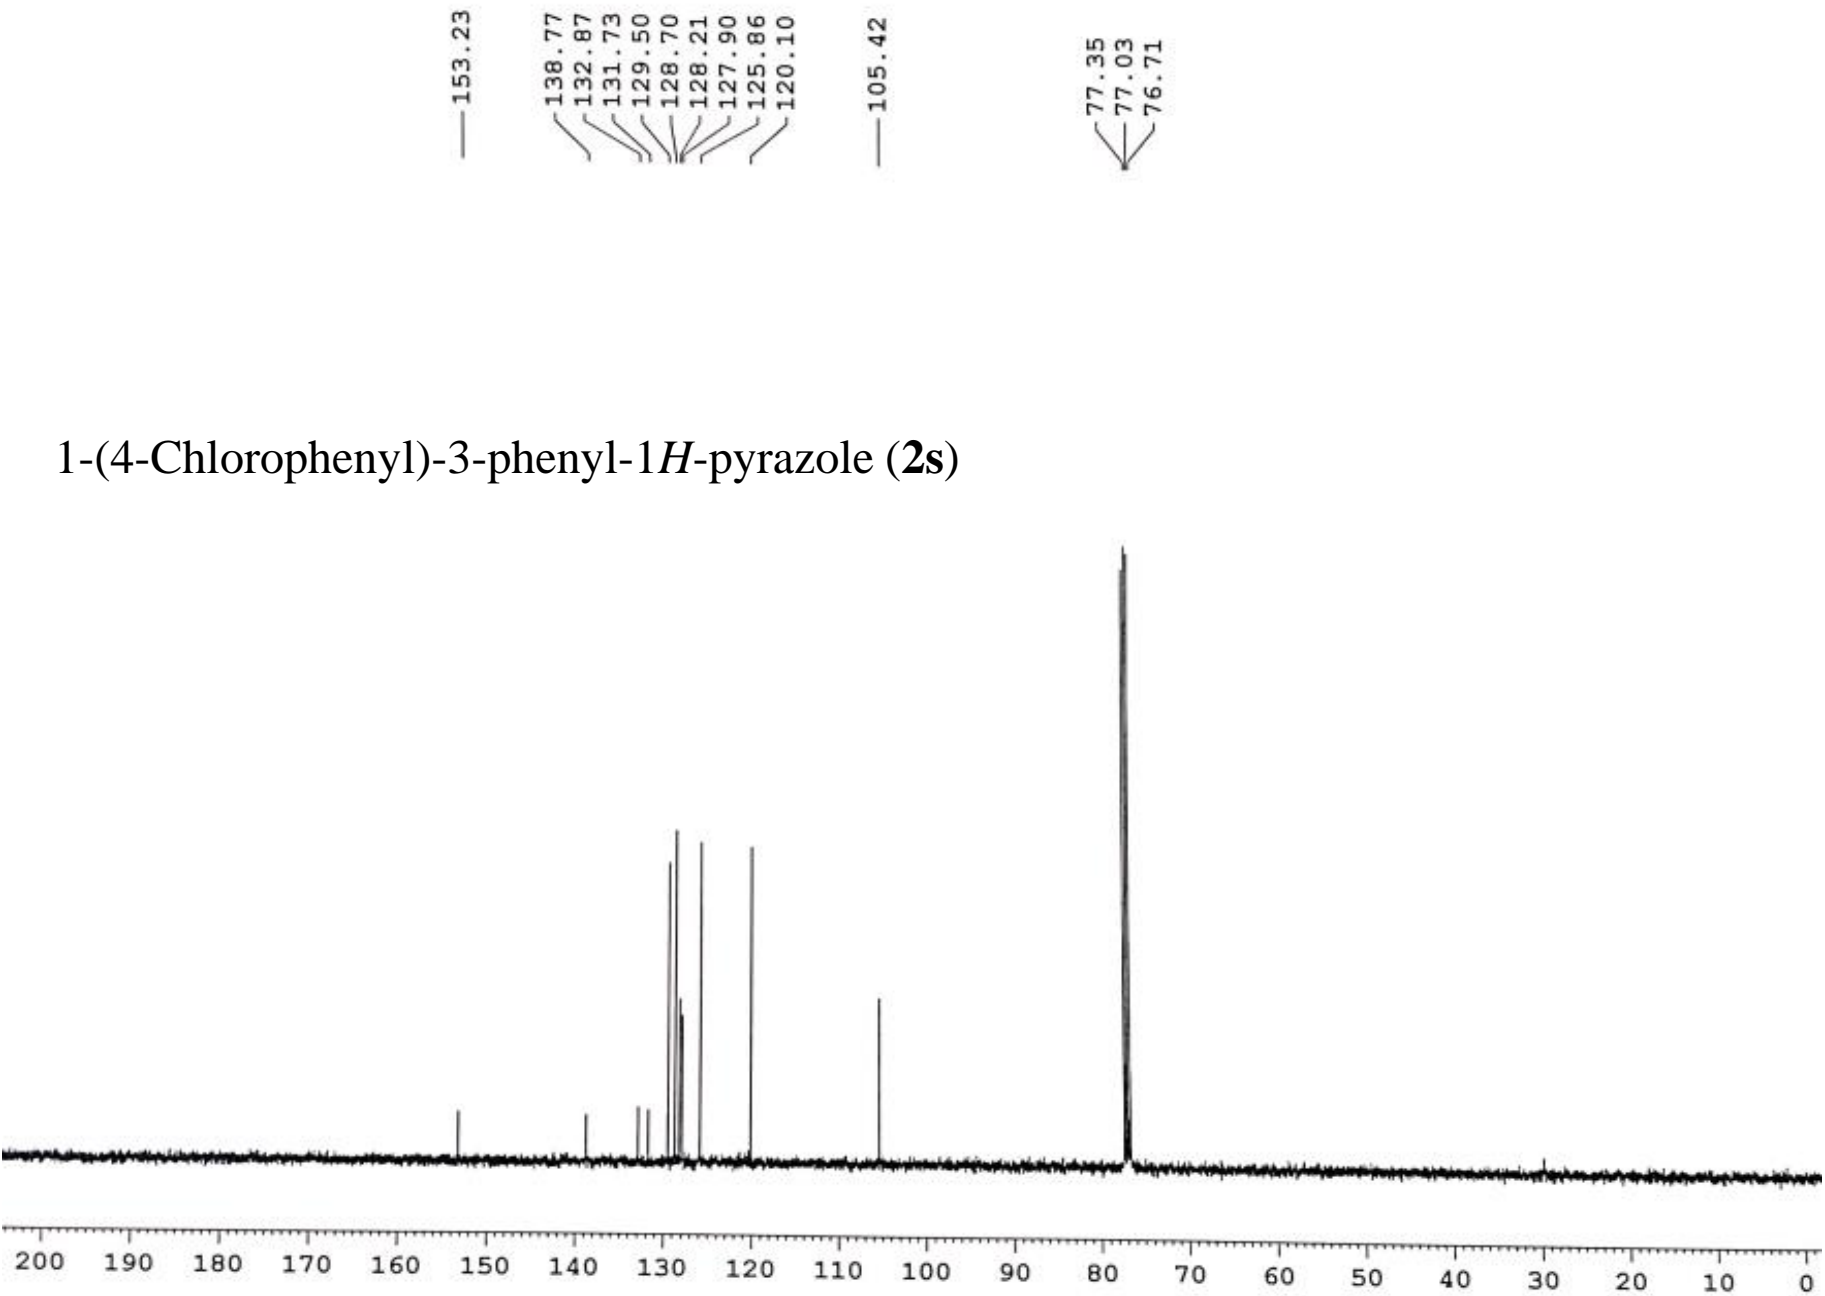

1-(4-Chlorophenyl)-3-phenyl-1H-pyrazole (2s)

1-(4-Chlorophenyl)-3-(4-methoxyphenyl)-1*H*-pyrazole (**2t**)

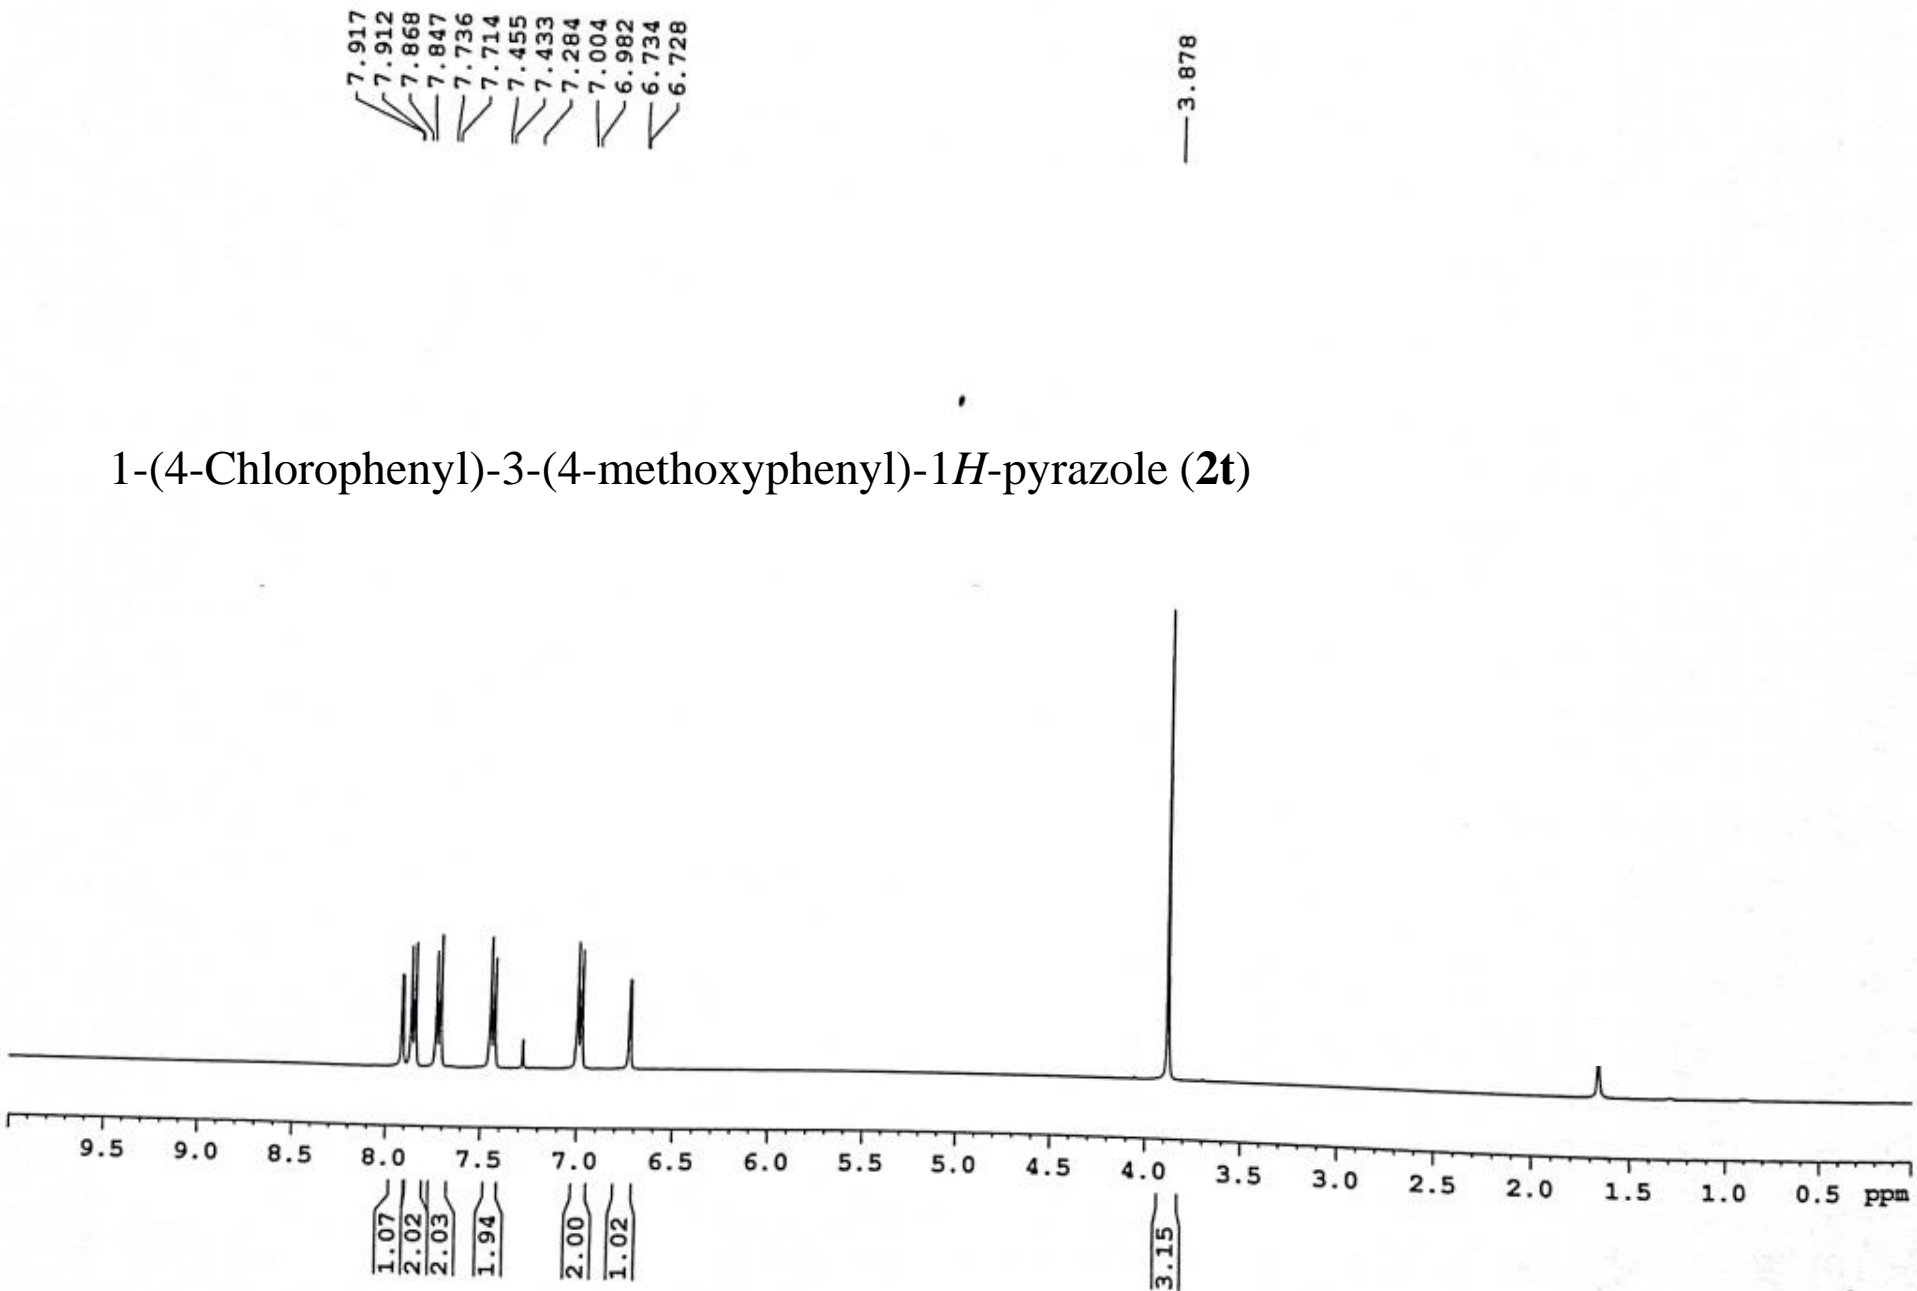

1-(4-Chlorophenyl)-3-(4-methoxyphenyl)-1*H*-pyrazole (**2t**)

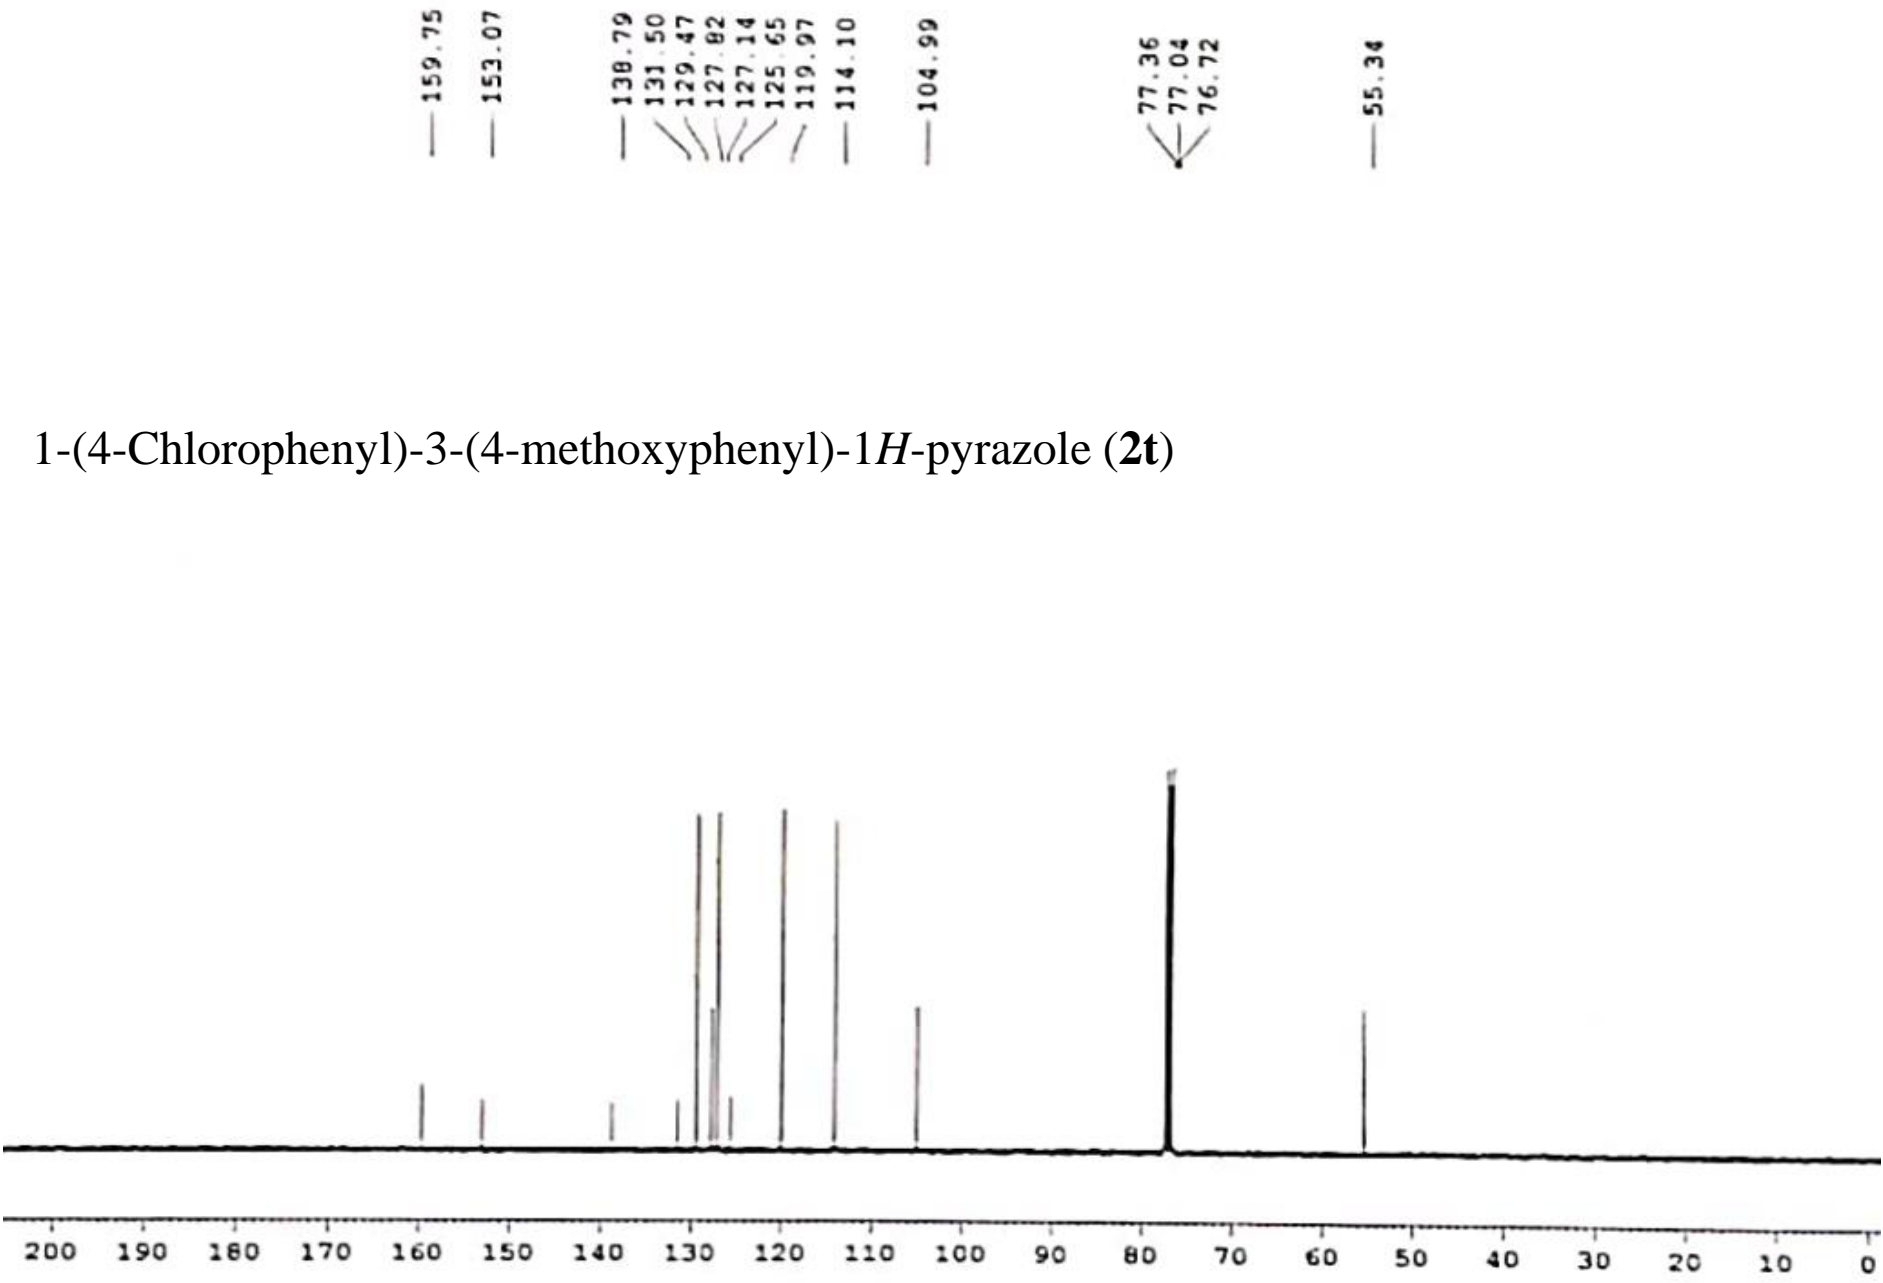

7.940  
7.934  
7.928  
7.867  
7.863  
7.850  
7.846  
7.840  
7.735  
7.731  
7.726  
7.713  
7.709  
7.467  
7.464  
7.445  
7.442  
7.433  
7.428  
7.416  
7.412  
7.406  
7.283  
6.774  
6.769  
6.763

1,3-Bis(4-chlorophenyl)-1*H*-pyrazole (**2u**)

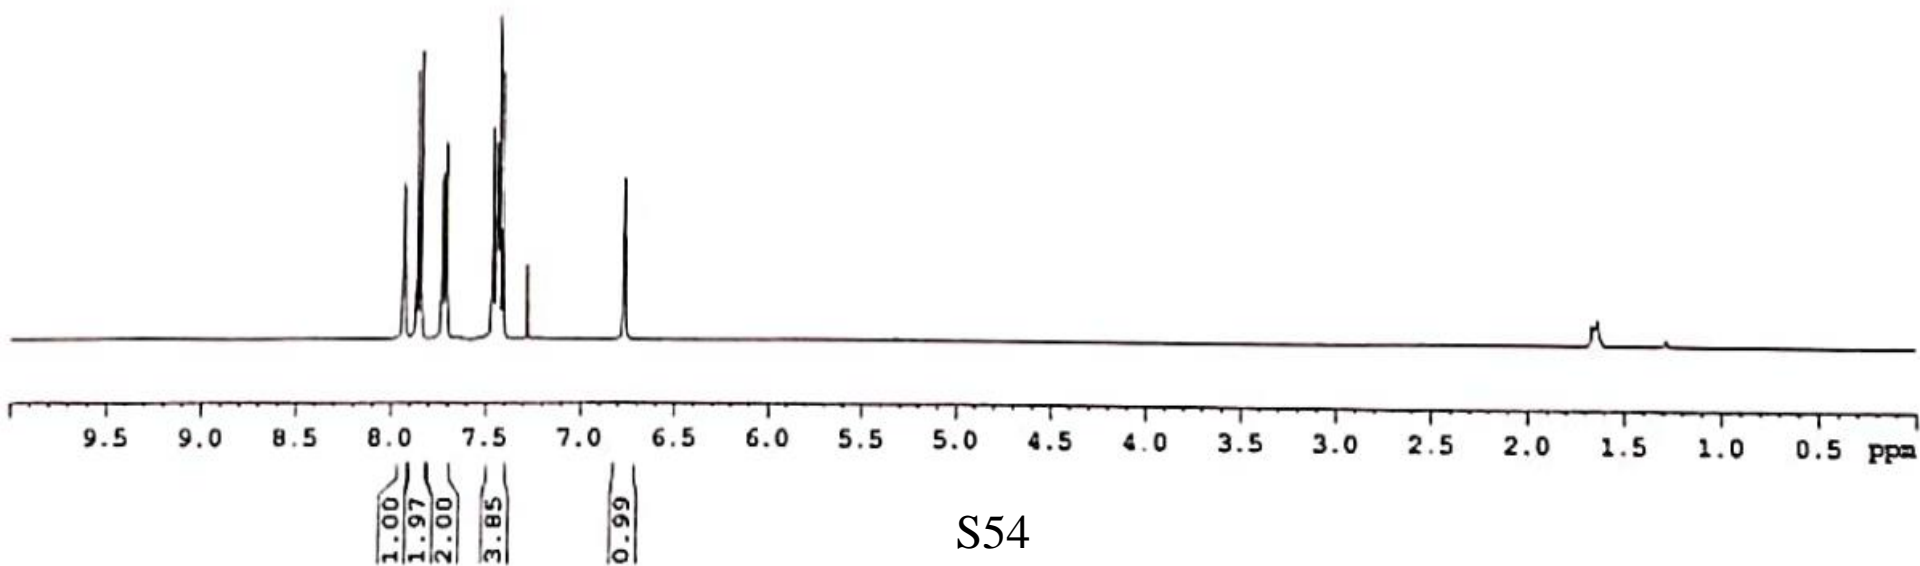

S54

1,3-Bis(4-chlorophenyl)-1*H*-pyrazole (**2u**)

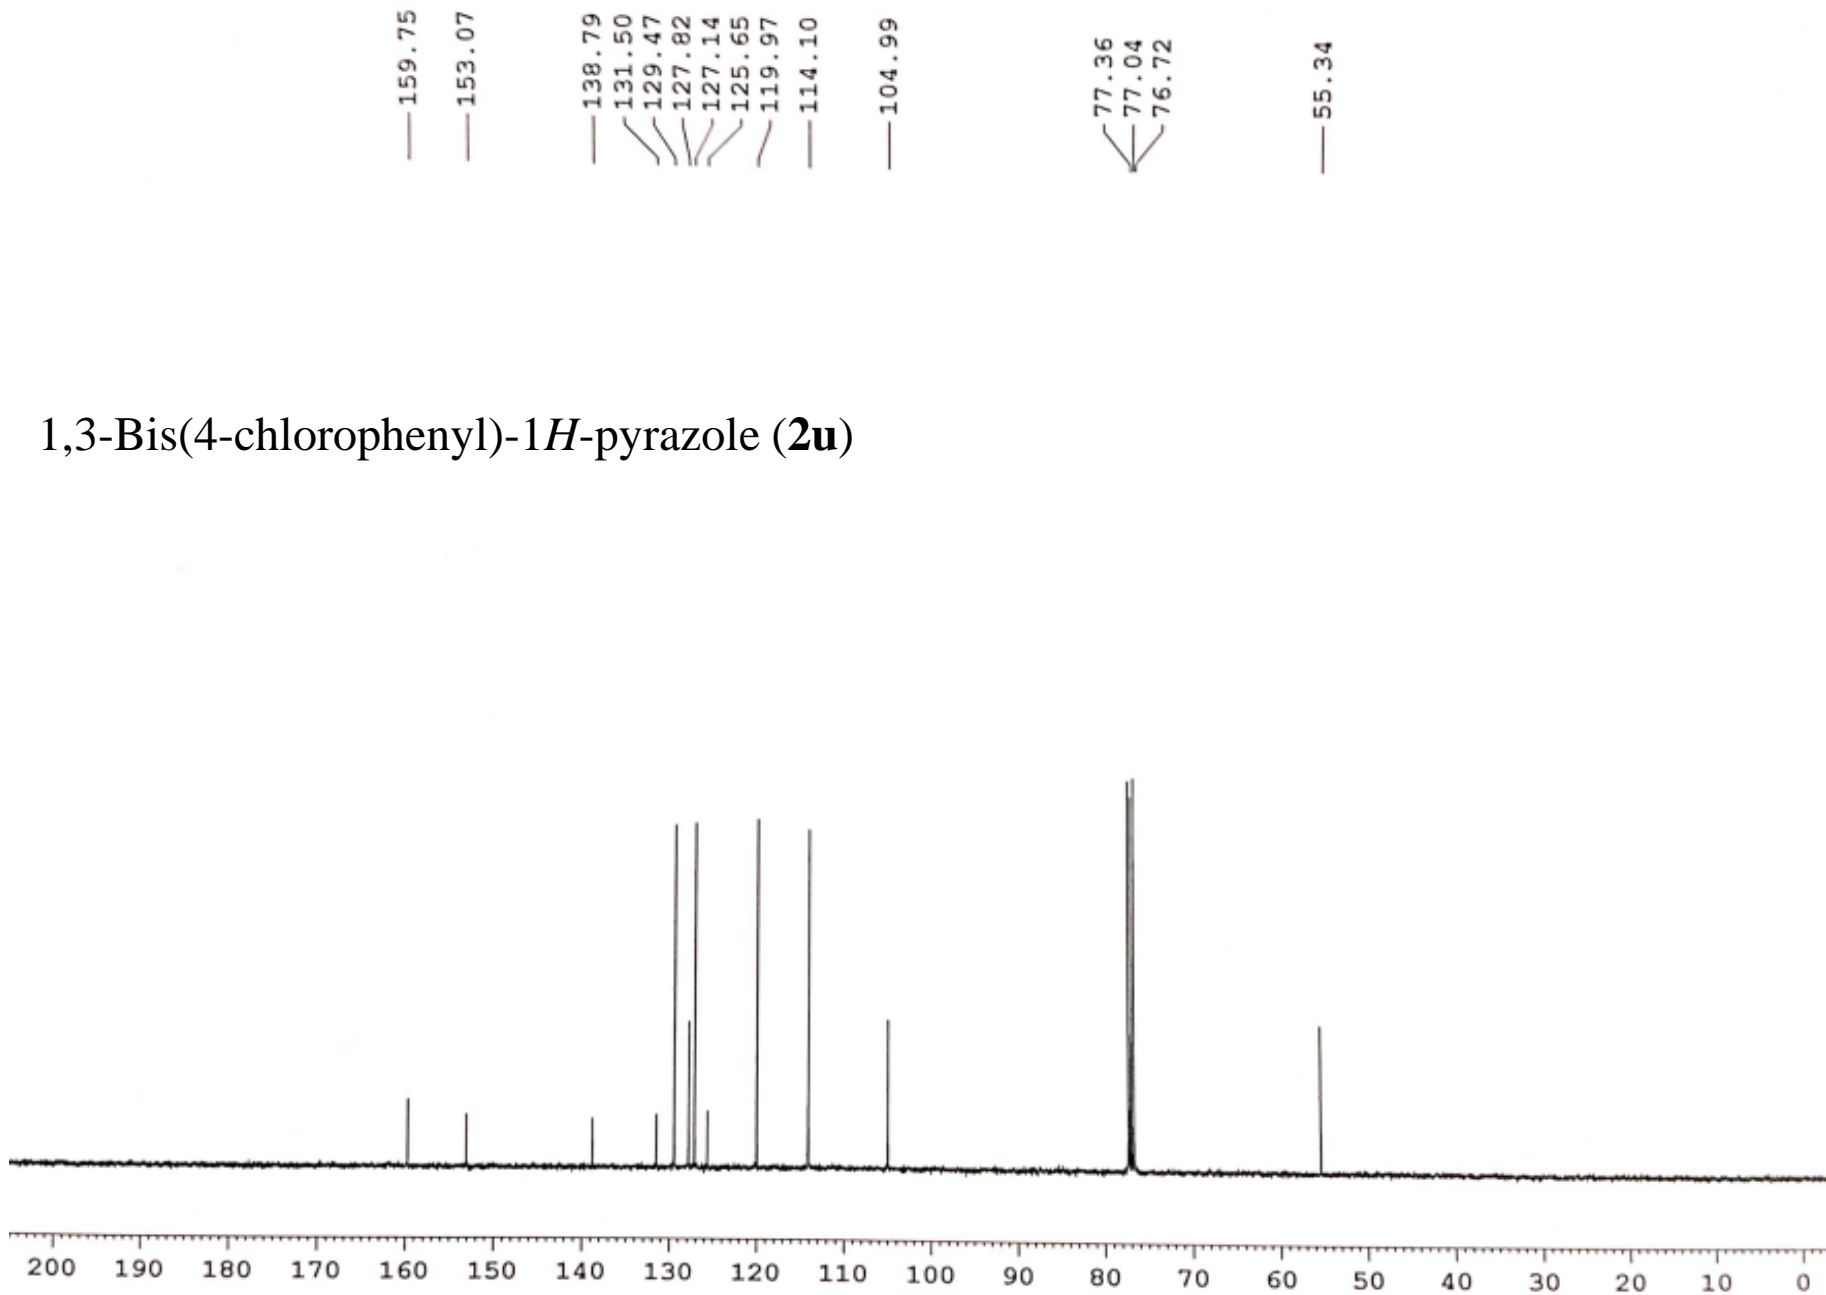

8.031  
8.011  
7.982  
7.980  
7.741  
7.721  
7.483  
7.462  
7.284  
6.855  
6.853

4-(1-(4-Chlorophenyl)-1*H*-pyrazol-3-yl)benzotrile (**2v**)

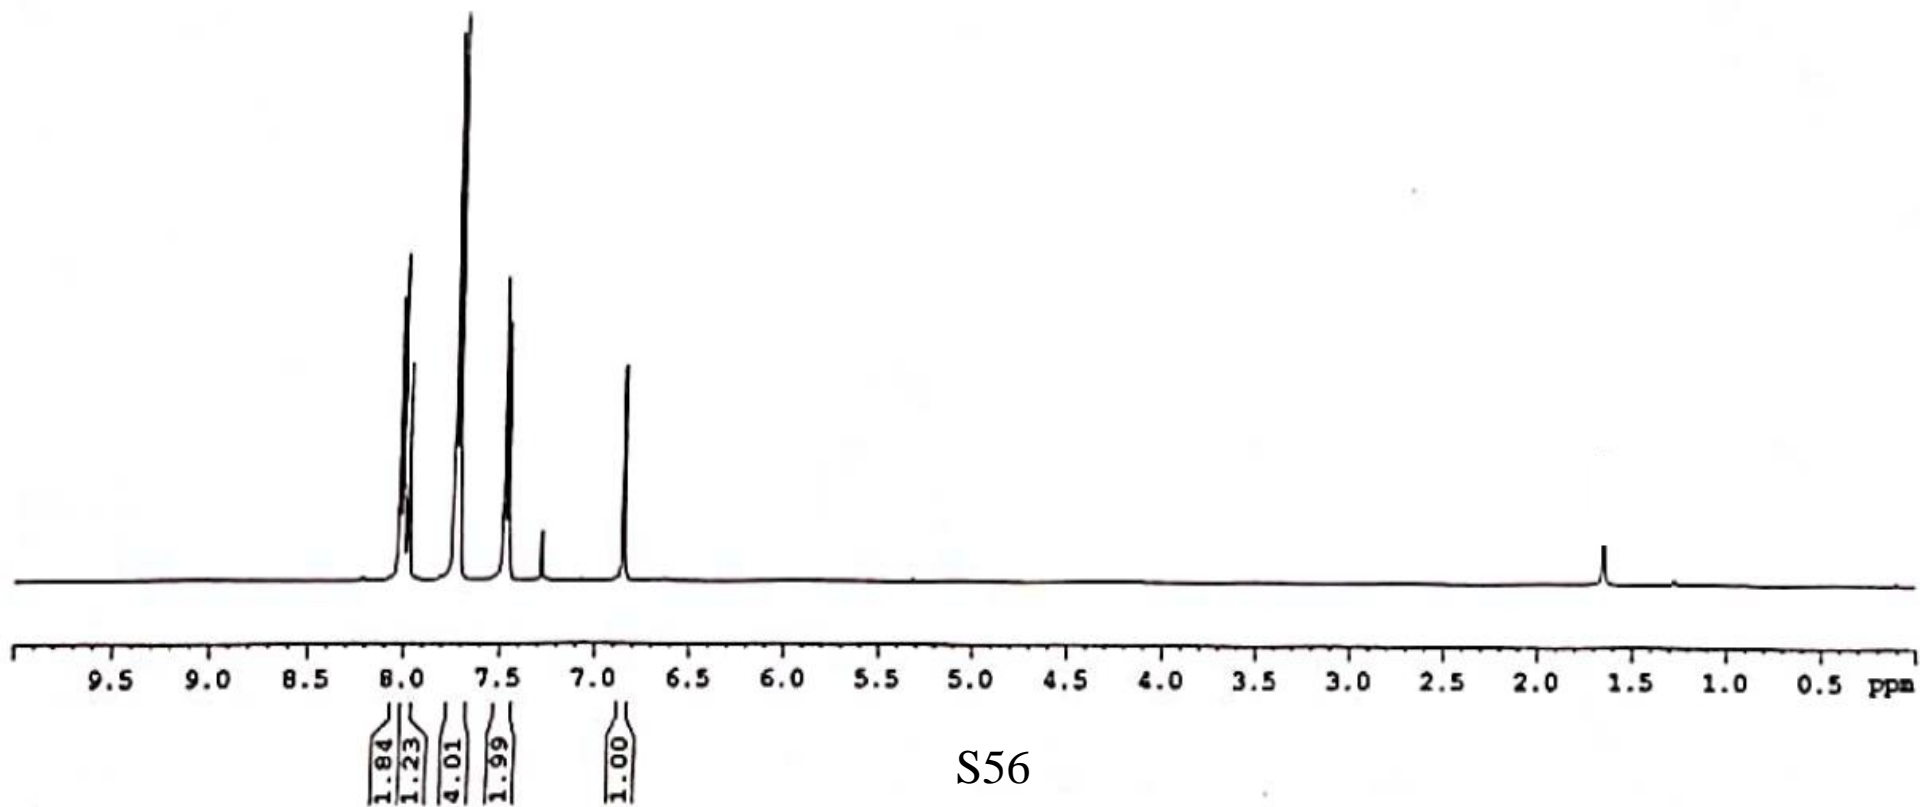

S56



— 151.16  
139.41  
137.21  
132.58  
132.40  
129.64  
128.48  
126.20  
120.27  
119.01  
— 111.38  
— 105.95  
77.37  
77.06  
76.74

4-(1-(4-Chlorophenyl)-1*H*-pyrazol-3-yl)benzotrile (**2v**)

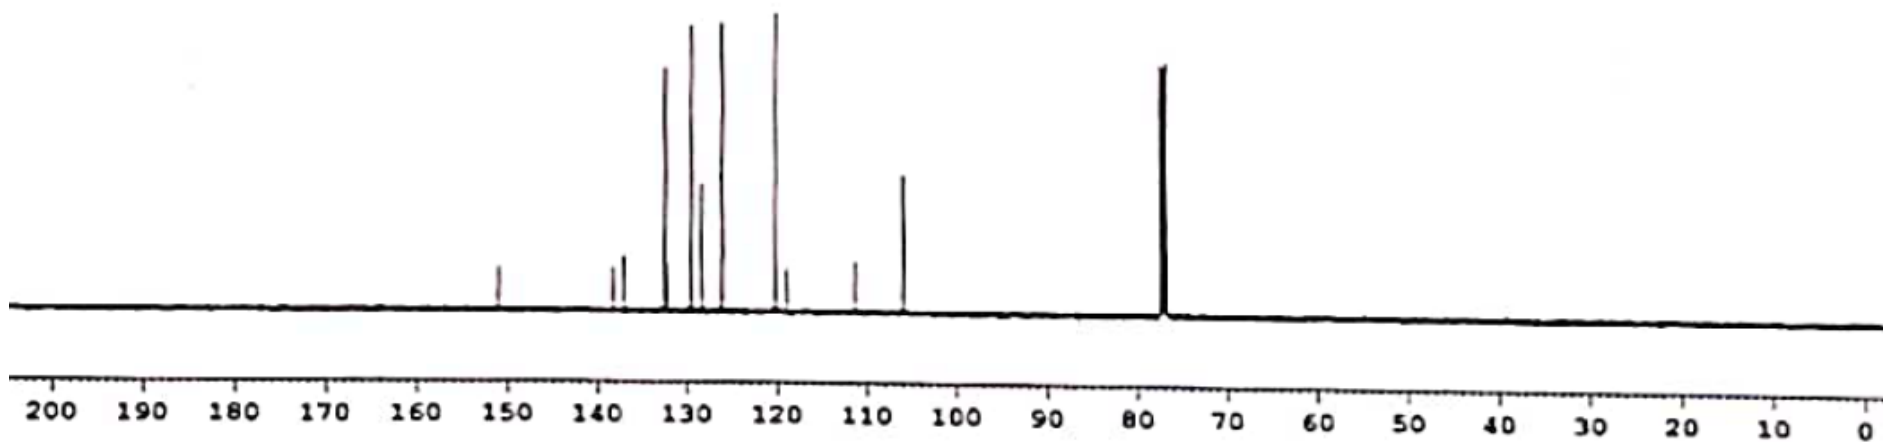

S57

7.981  
7.975  
7.828  
7.807  
7.793  
7.774  
7.588  
7.567  
7.518  
7.498  
7.478  
7.348  
7.330  
7.311  
7.284  
6.777  
6.771

1-(4-Bromophenyl)-3-phenyl-1*H*-pyrazole (**2w**)

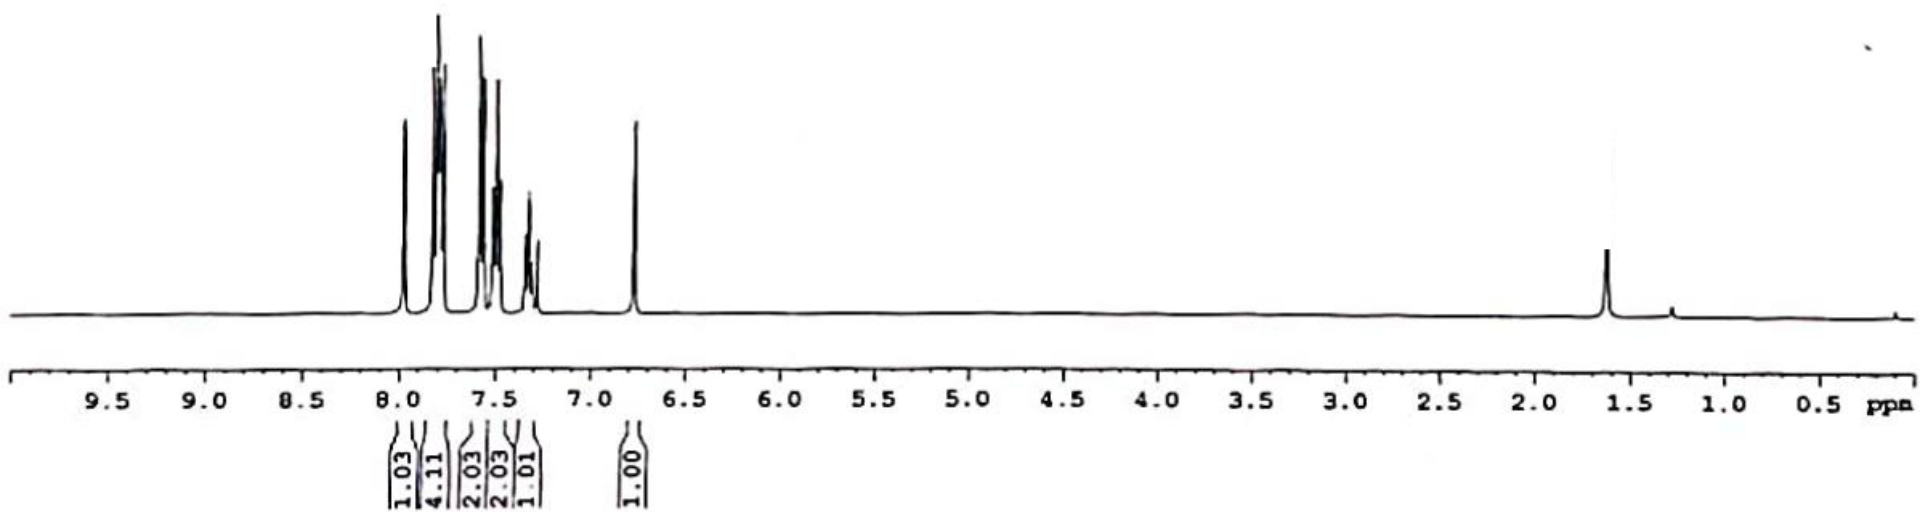

1-(4-Bromophenyl)-3-phenyl-1*H*-pyrazole (**2w**)

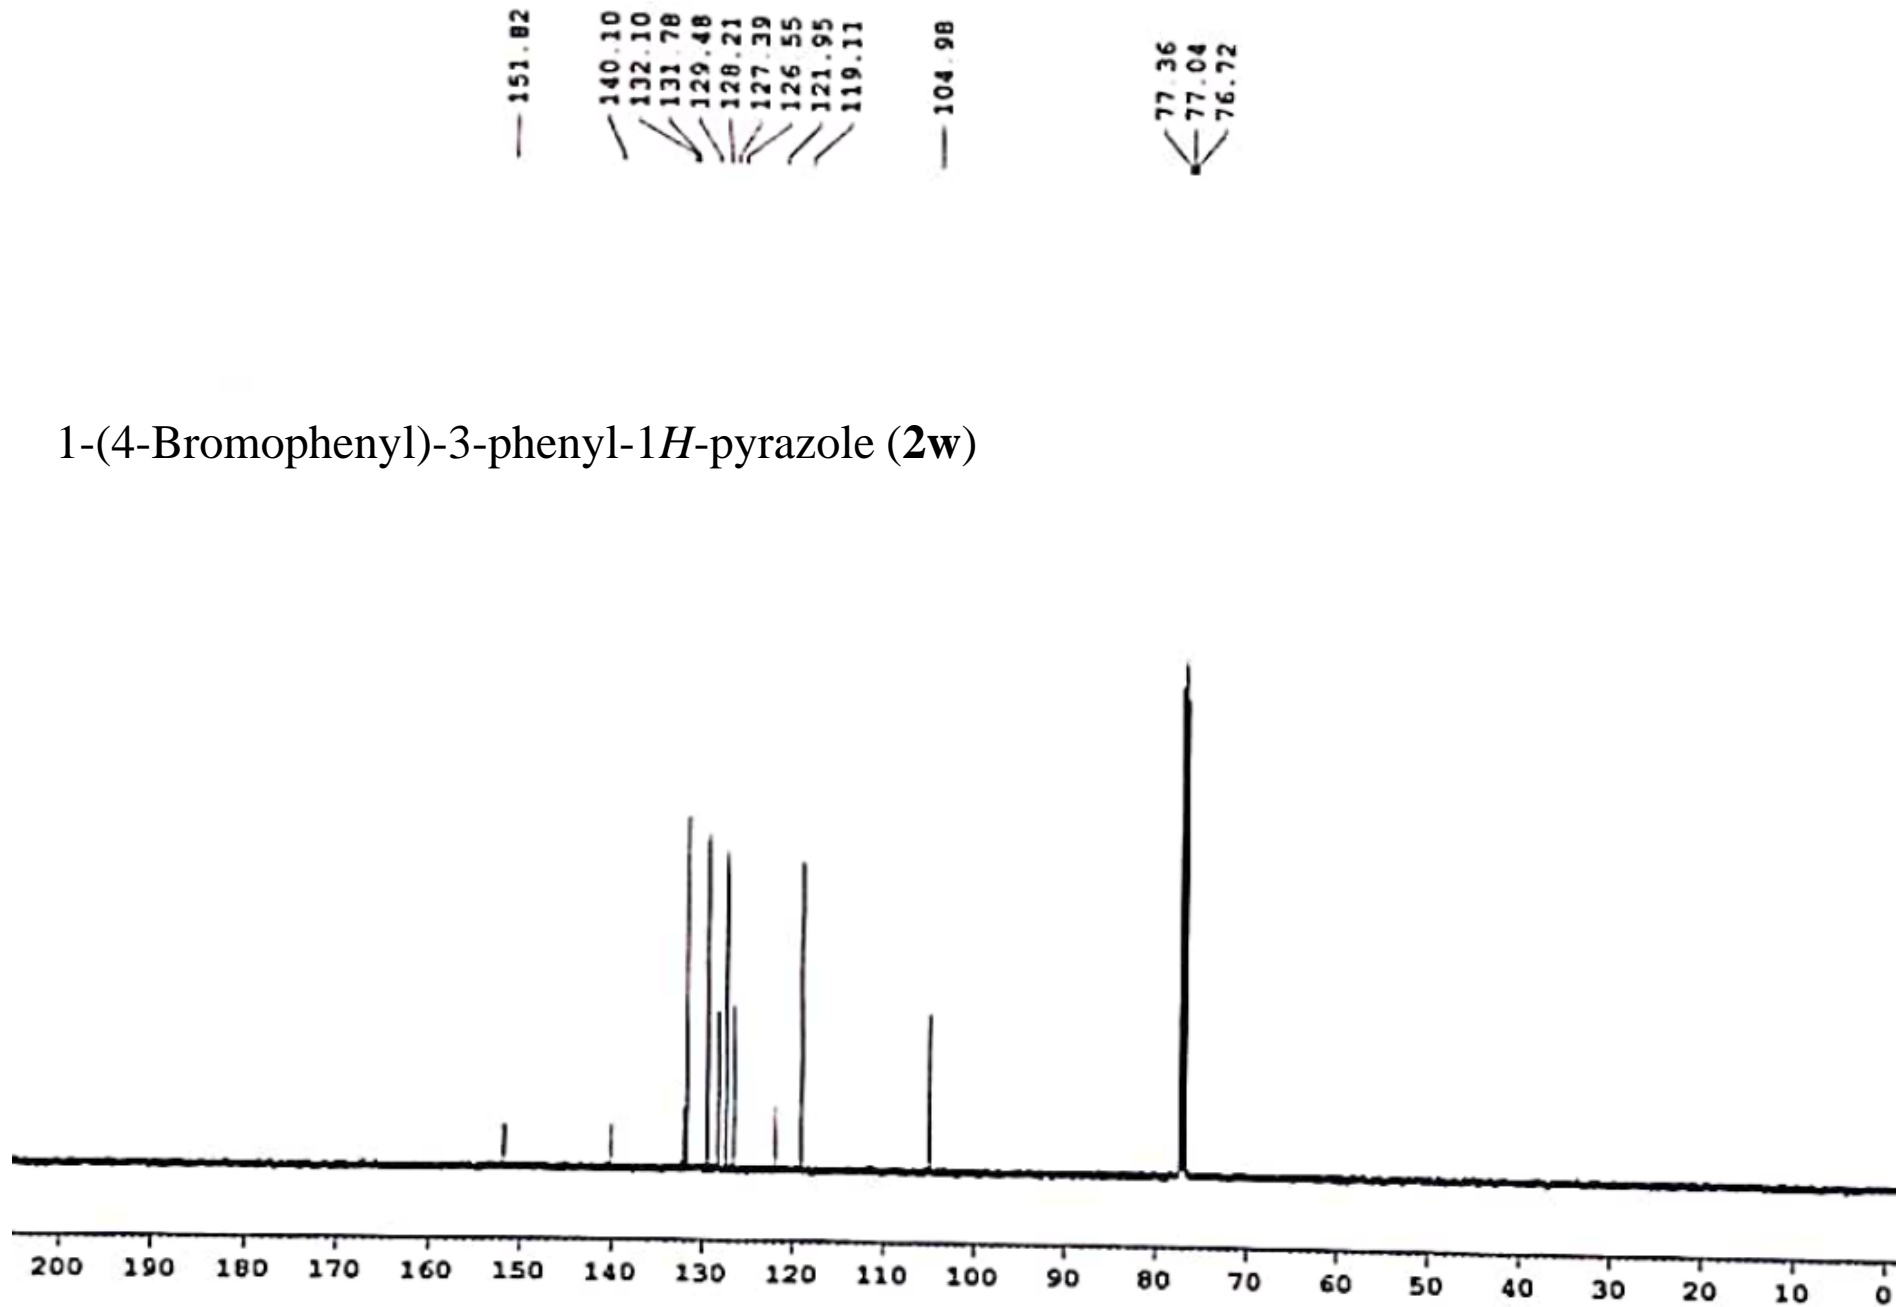

1-(4-Bromophenyl)-3-(4-methoxyphenyl)-1*H*-pyrazole (**2x**)

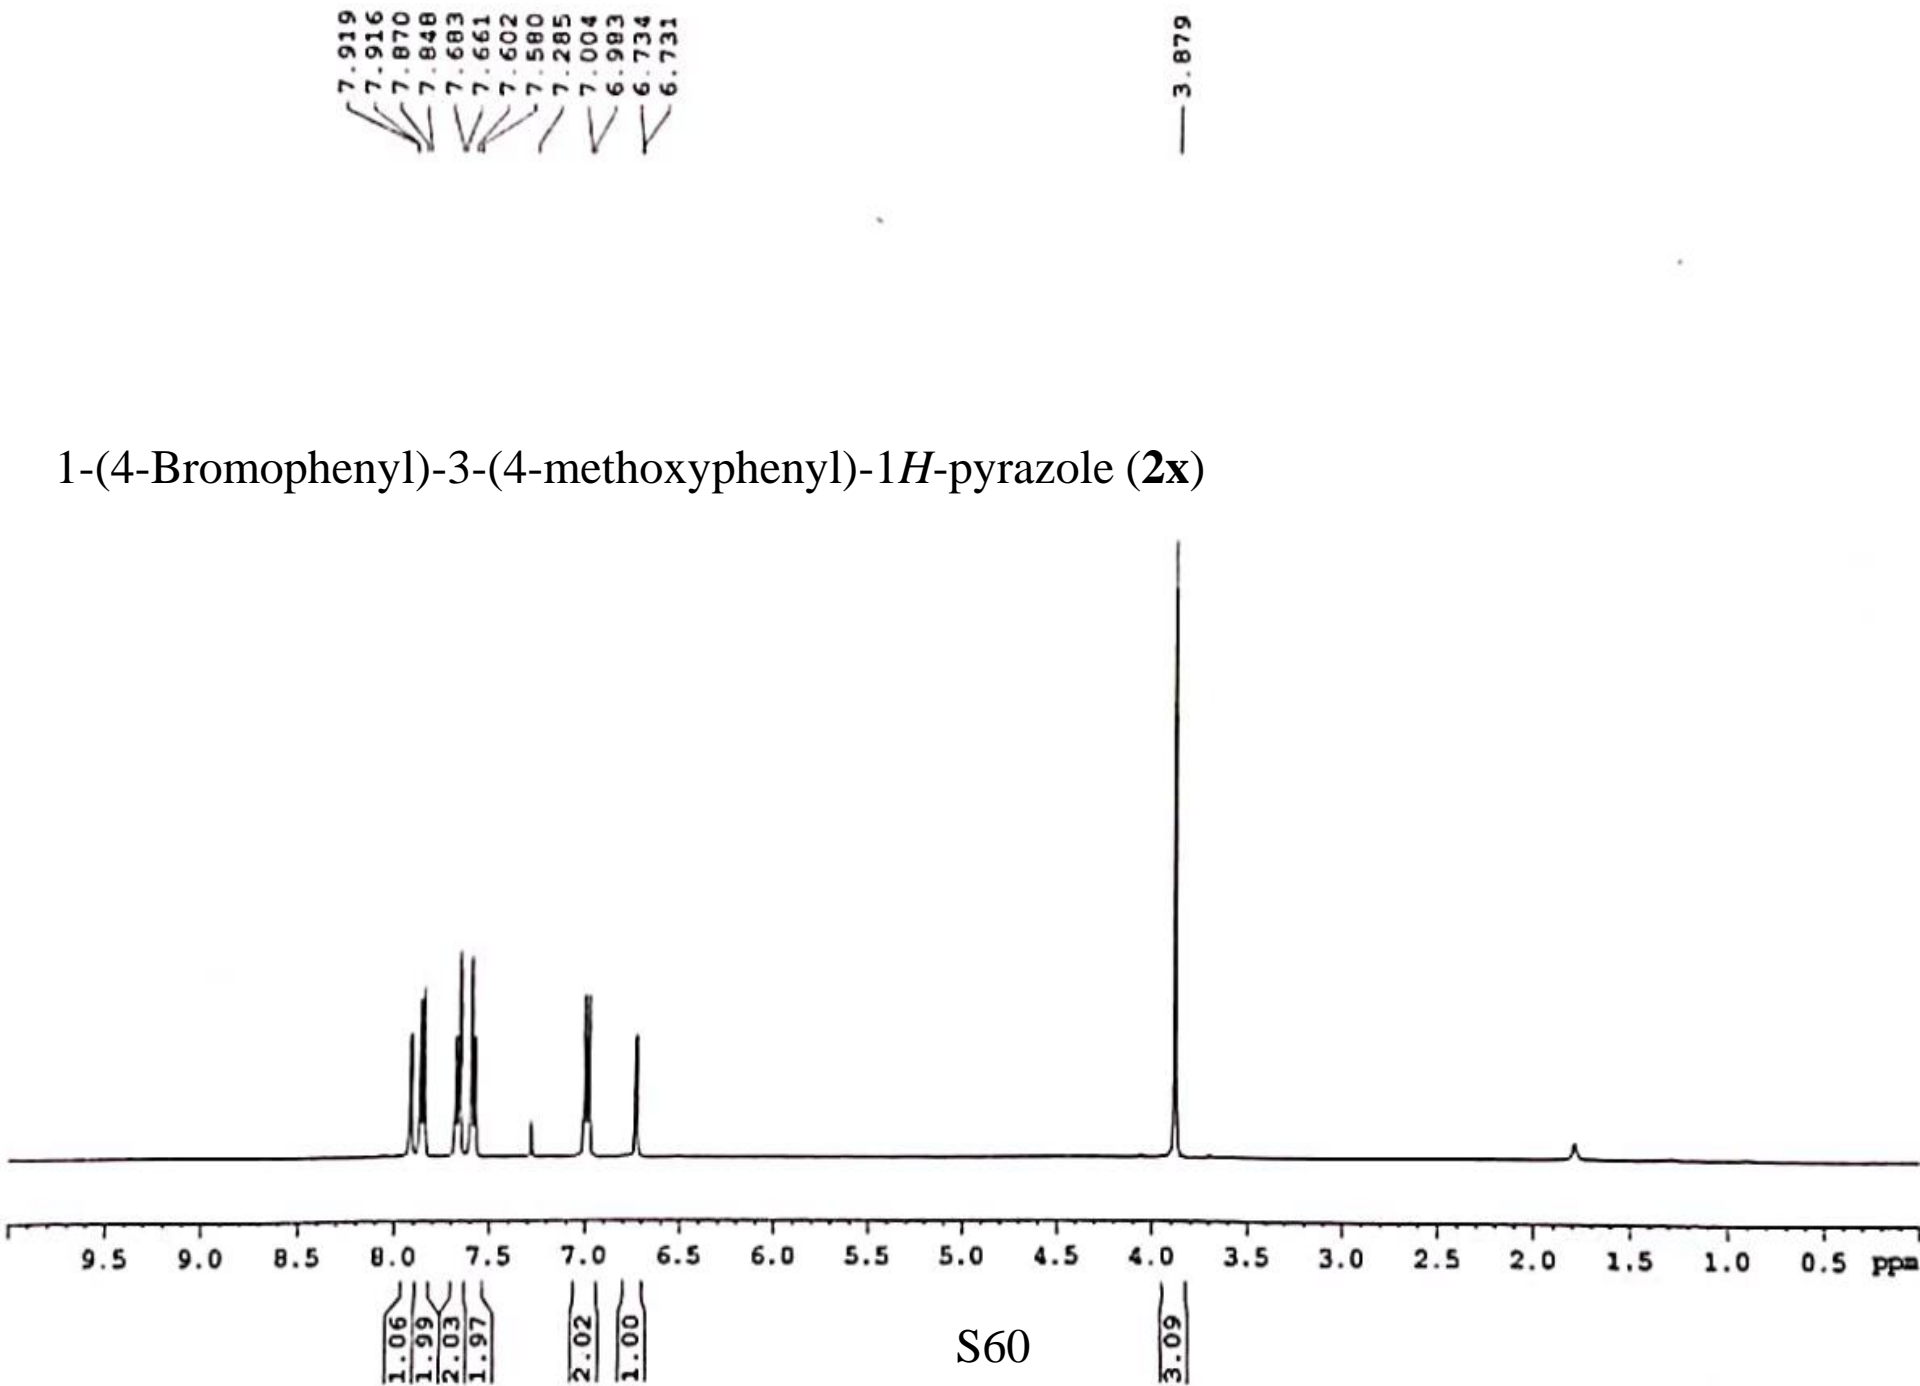

— 159.75  
— 153.08  
— 139.22  
— 132.42  
— 127.79  
— 127.15  
— 125.60  
— 120.26  
— 119.23  
— 114.10  
— 105.06  
— 77.38  
— 77.06  
— 76.74  
— 55.36

1-(4-Bromophenyl)-3-(4-methoxyphenyl)-1*H*-pyrazole (**2x**)

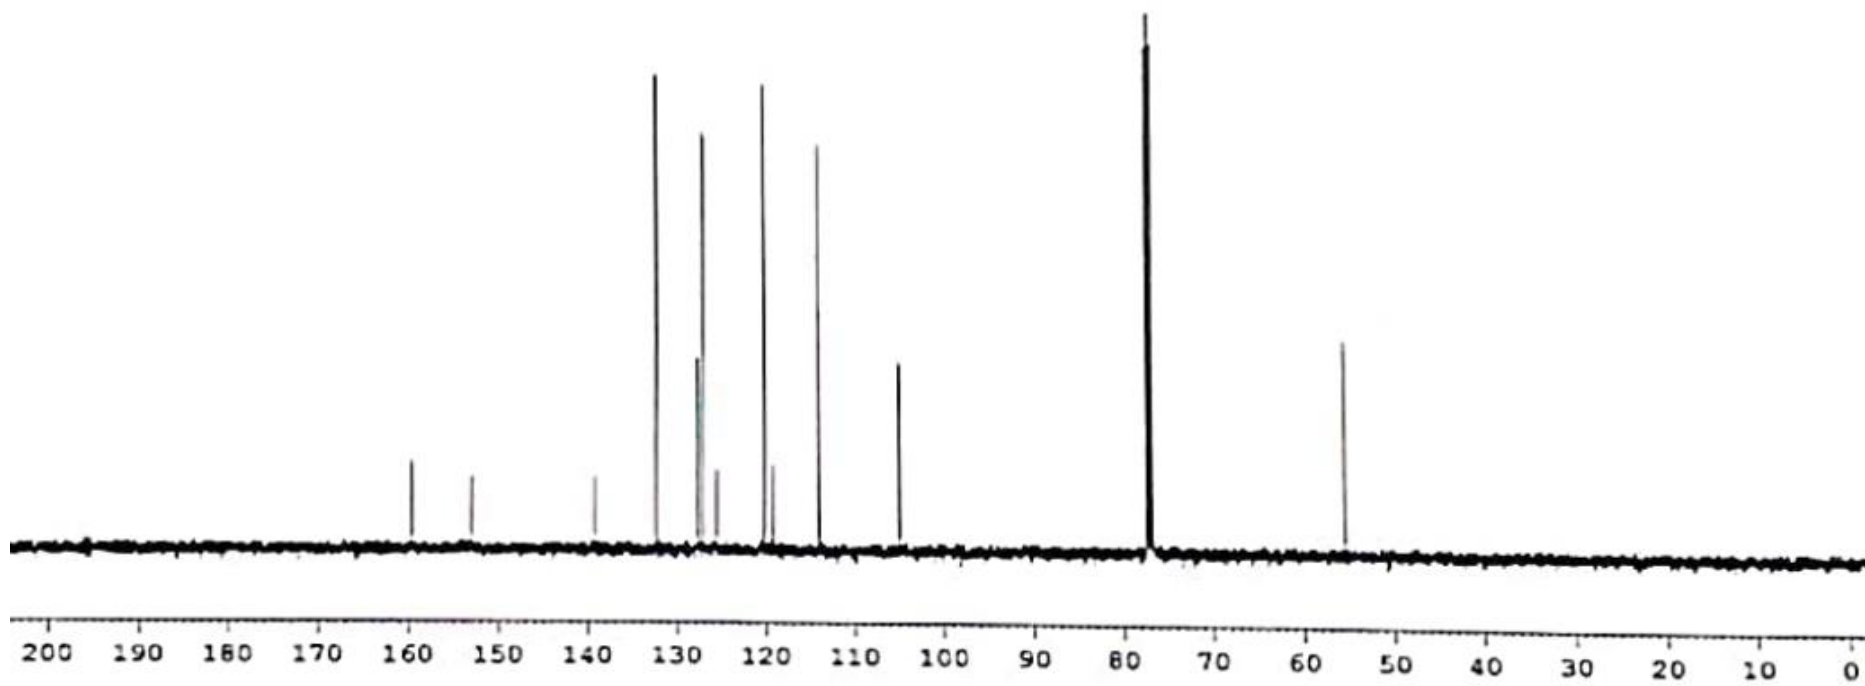

S61

7.952  
7.946  
7.869  
7.848  
7.686  
7.664  
7.620  
7.597  
7.434  
7.413  
7.284  
6.782  
6.776

1-(4-Bromophenyl)-3-(4-chlorophenyl)-1*H*-pyrazole (**2y**)

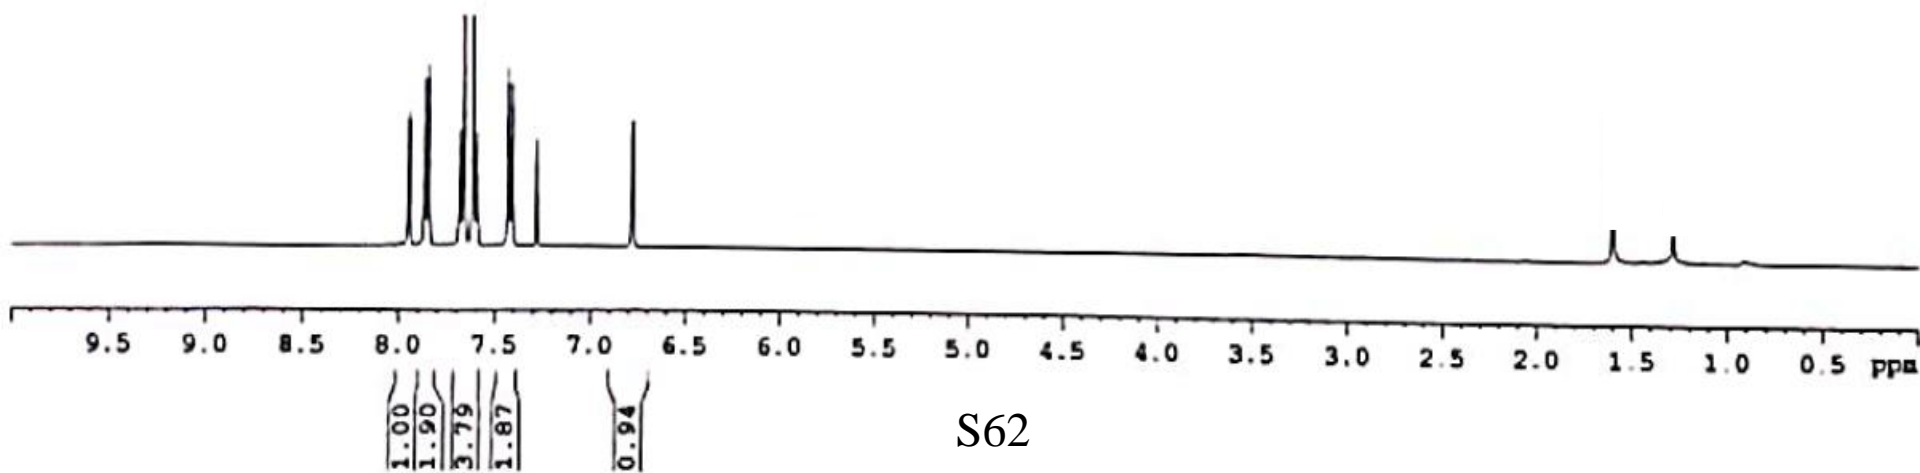

1-(4-Bromophenyl)-3-(4-chlorophenyl)-1*H*-pyrazole (**2y**)

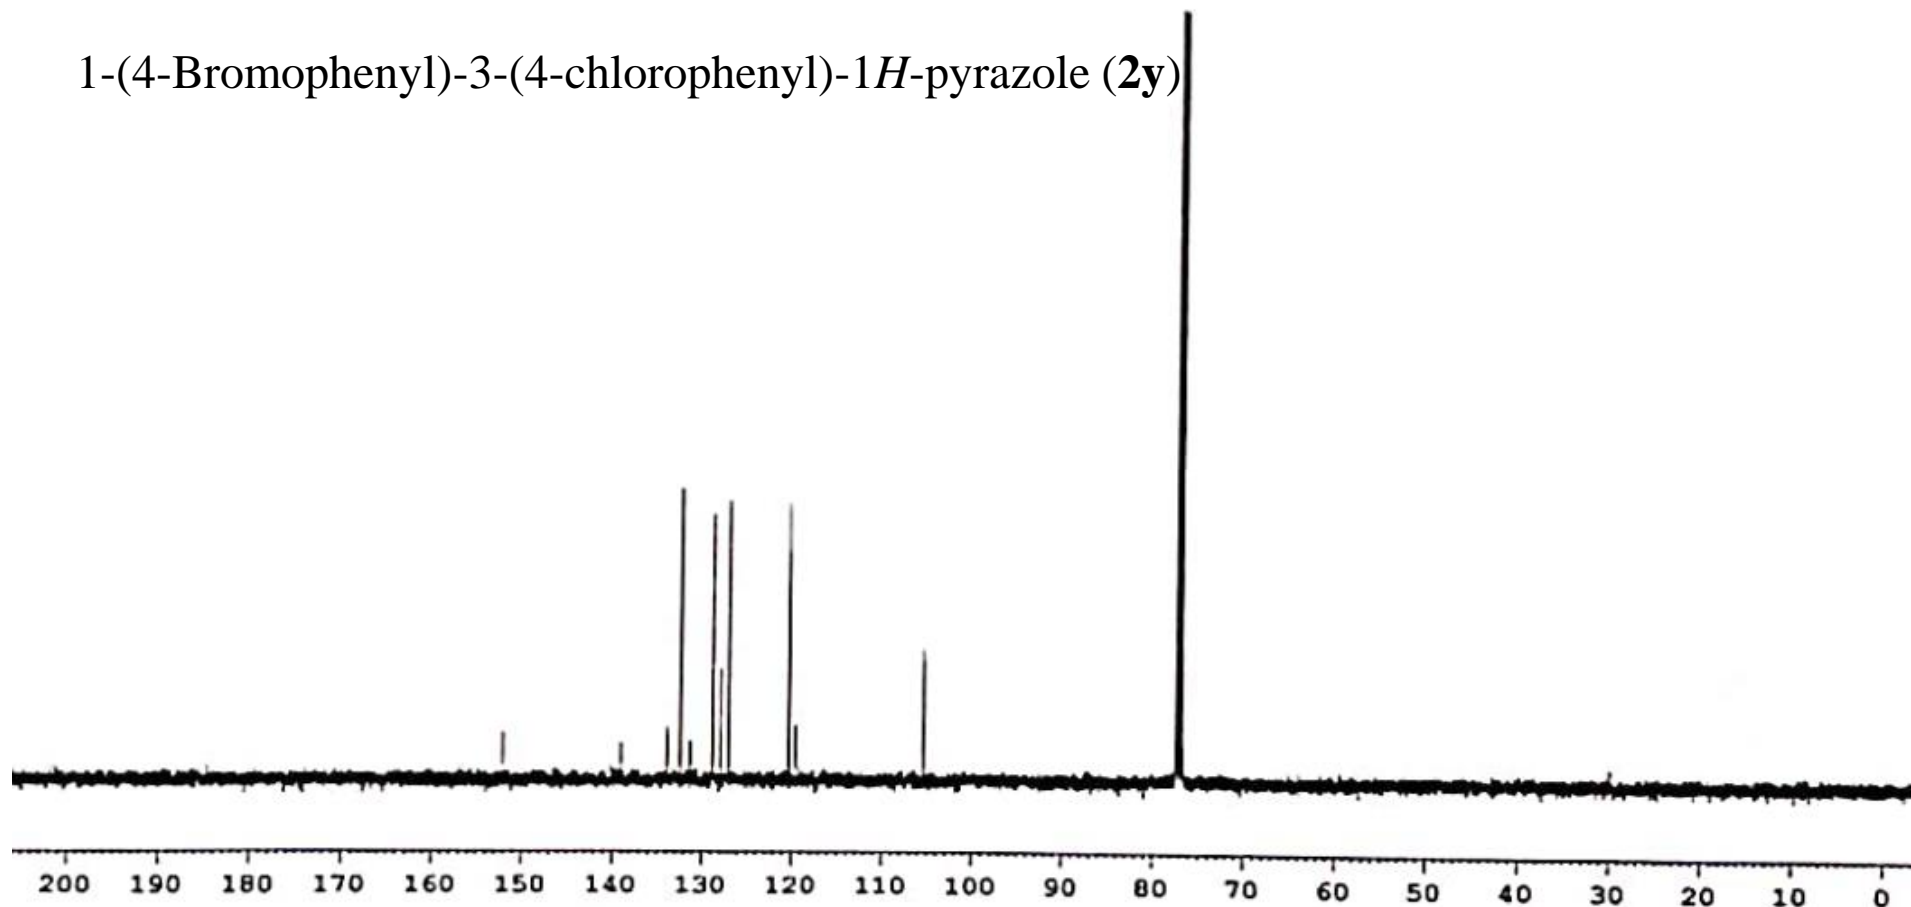

S63

7.908  
7.905  
7.887  
7.572  
7.568  
7.563  
7.550  
7.548  
7.535  
7.529  
7.516  
7.512  
7.500  
7.496  
7.454  
7.452  
7.448  
7.435  
7.416  
7.399  
7.359  
7.356  
7.341  
7.322  
7.284  
6.561

— 2.413

5-Methyl-1,3-diphenyl-1*H*-pyrazole (**3a**)

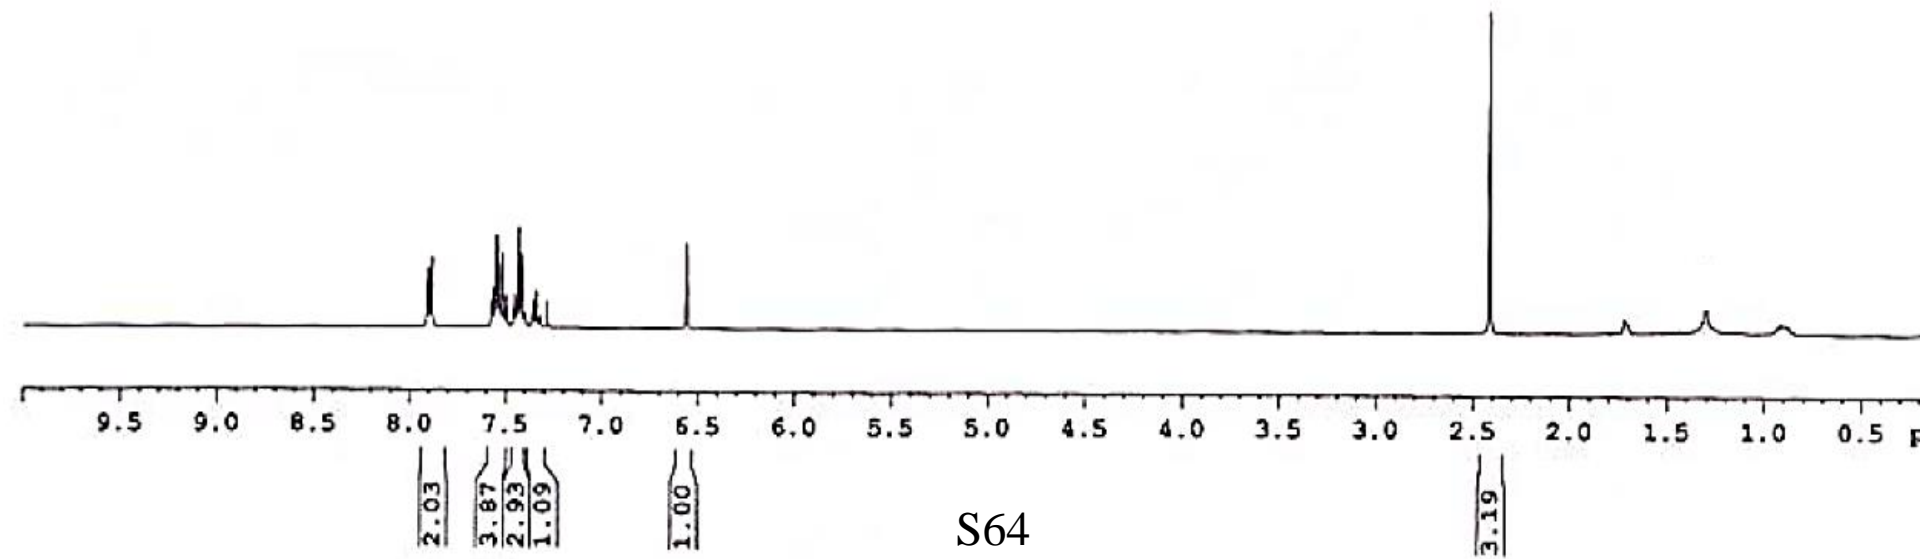

S64



5-Methyl-1,3-diphenyl-1*H*-pyrazole (**3a**)

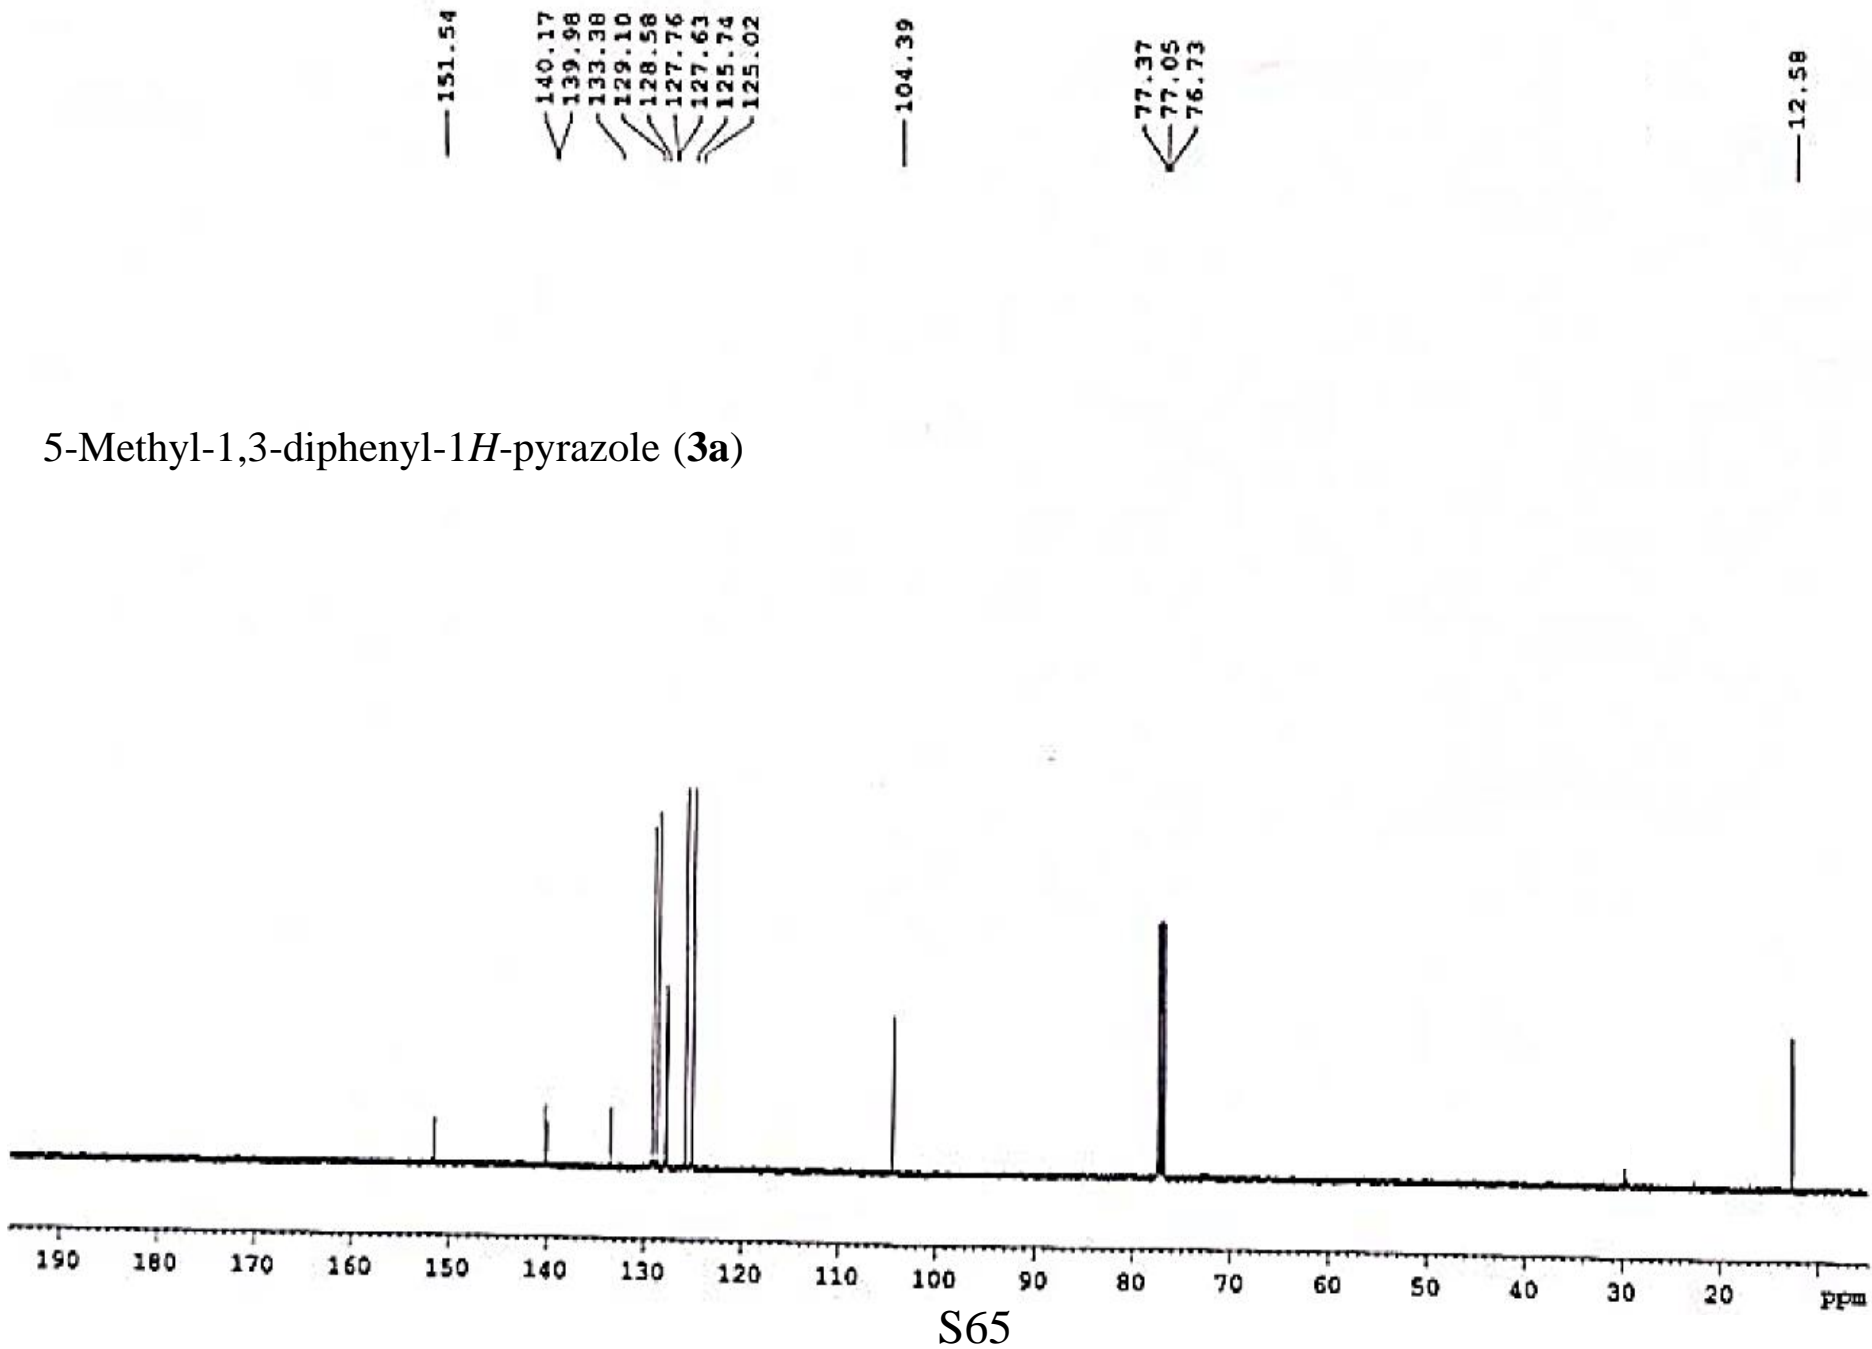

3-(4-Methoxyphenyl)-5-methyl-1-phenyl-1*H*-pyrazole (**3b**)

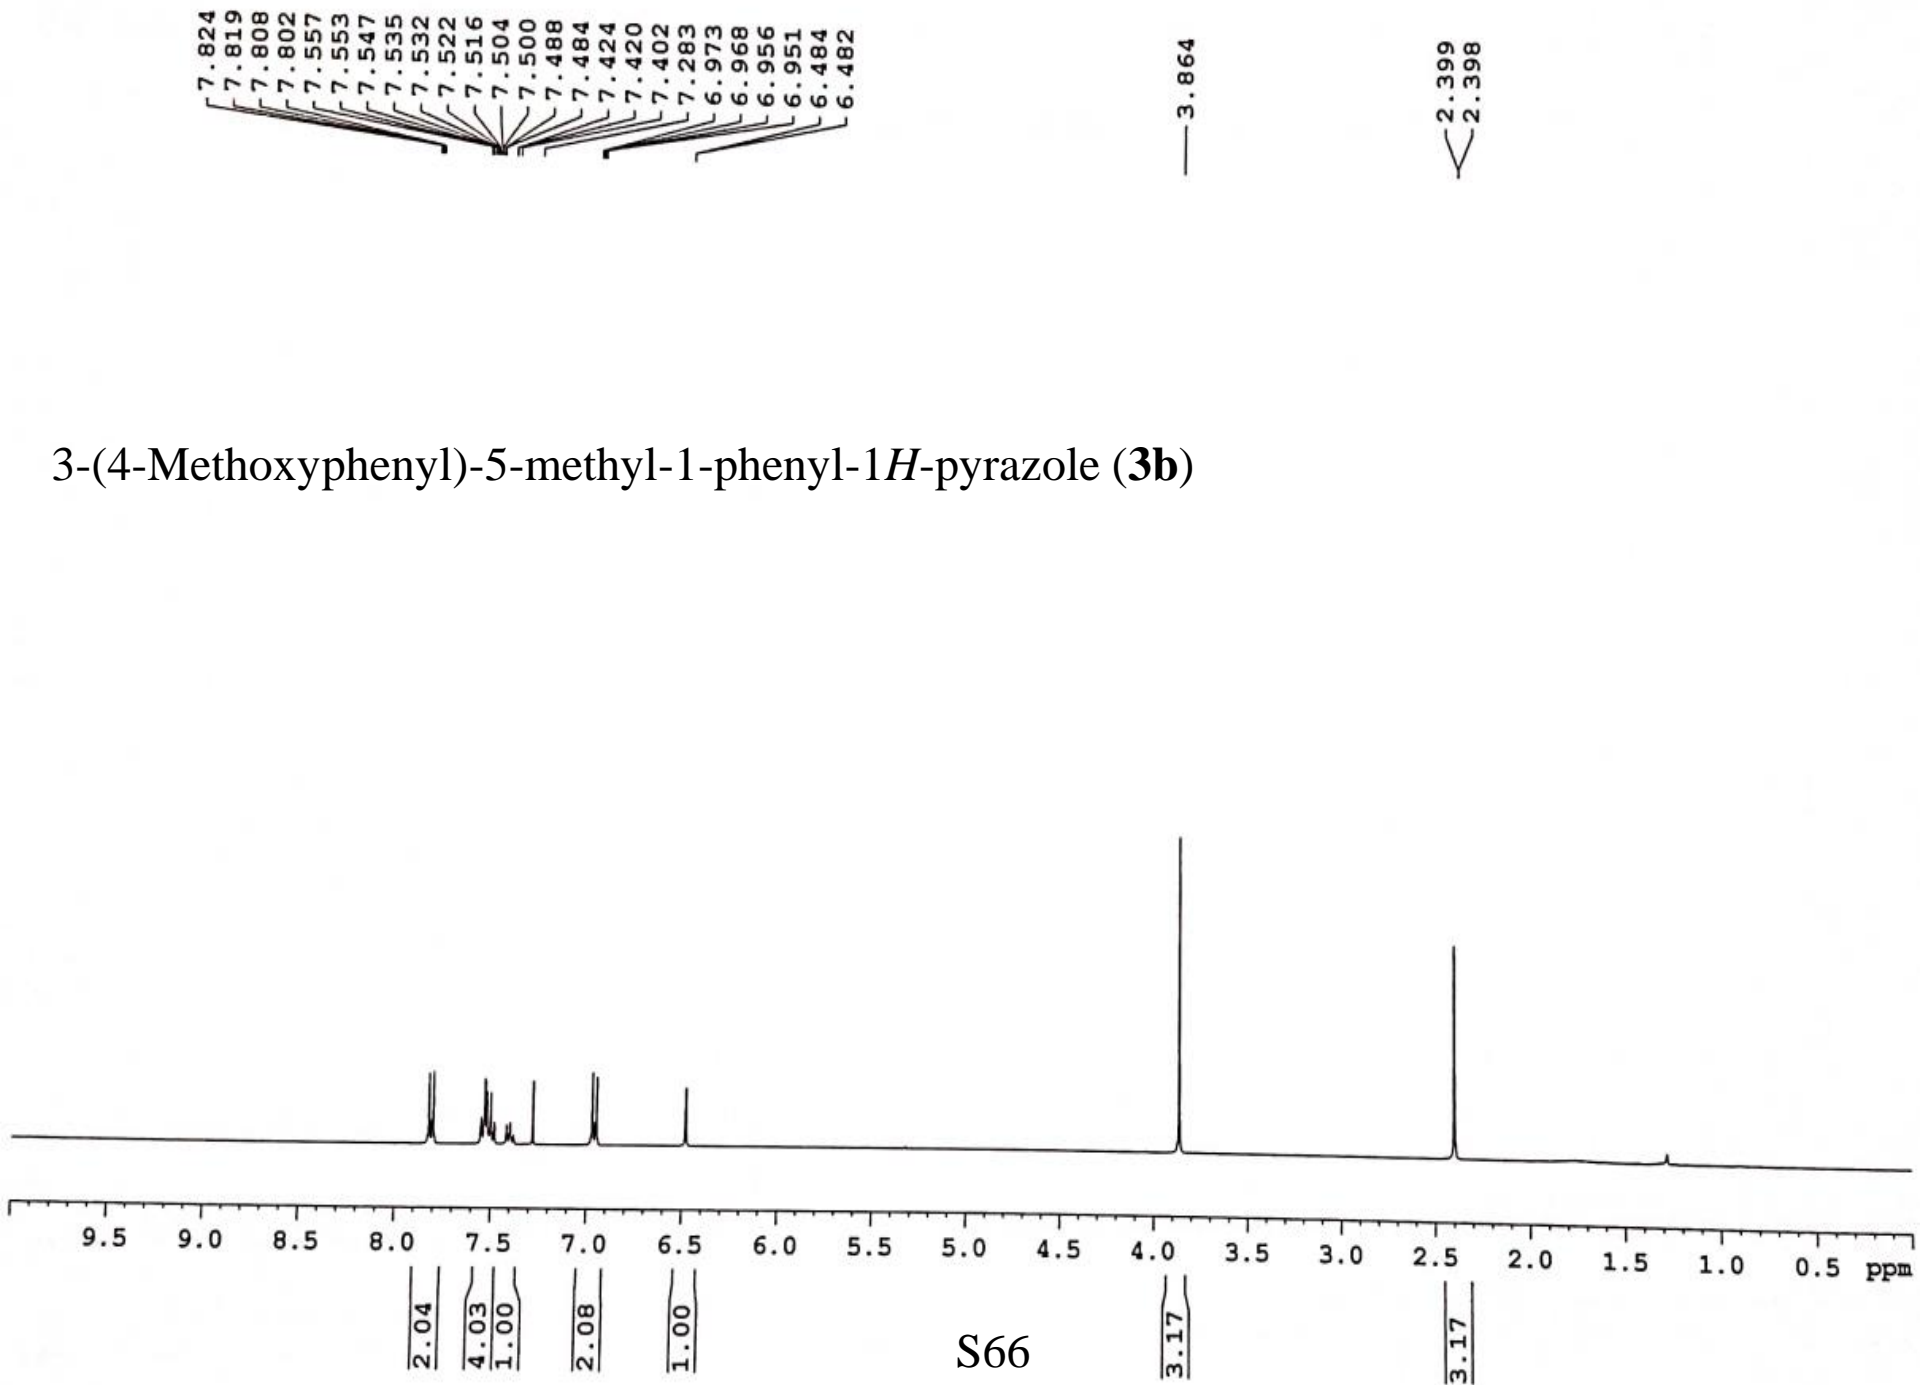

3-(4-Methoxyphenyl)-5-methyl-1-phenyl-1*H*-pyrazole (**3b**)

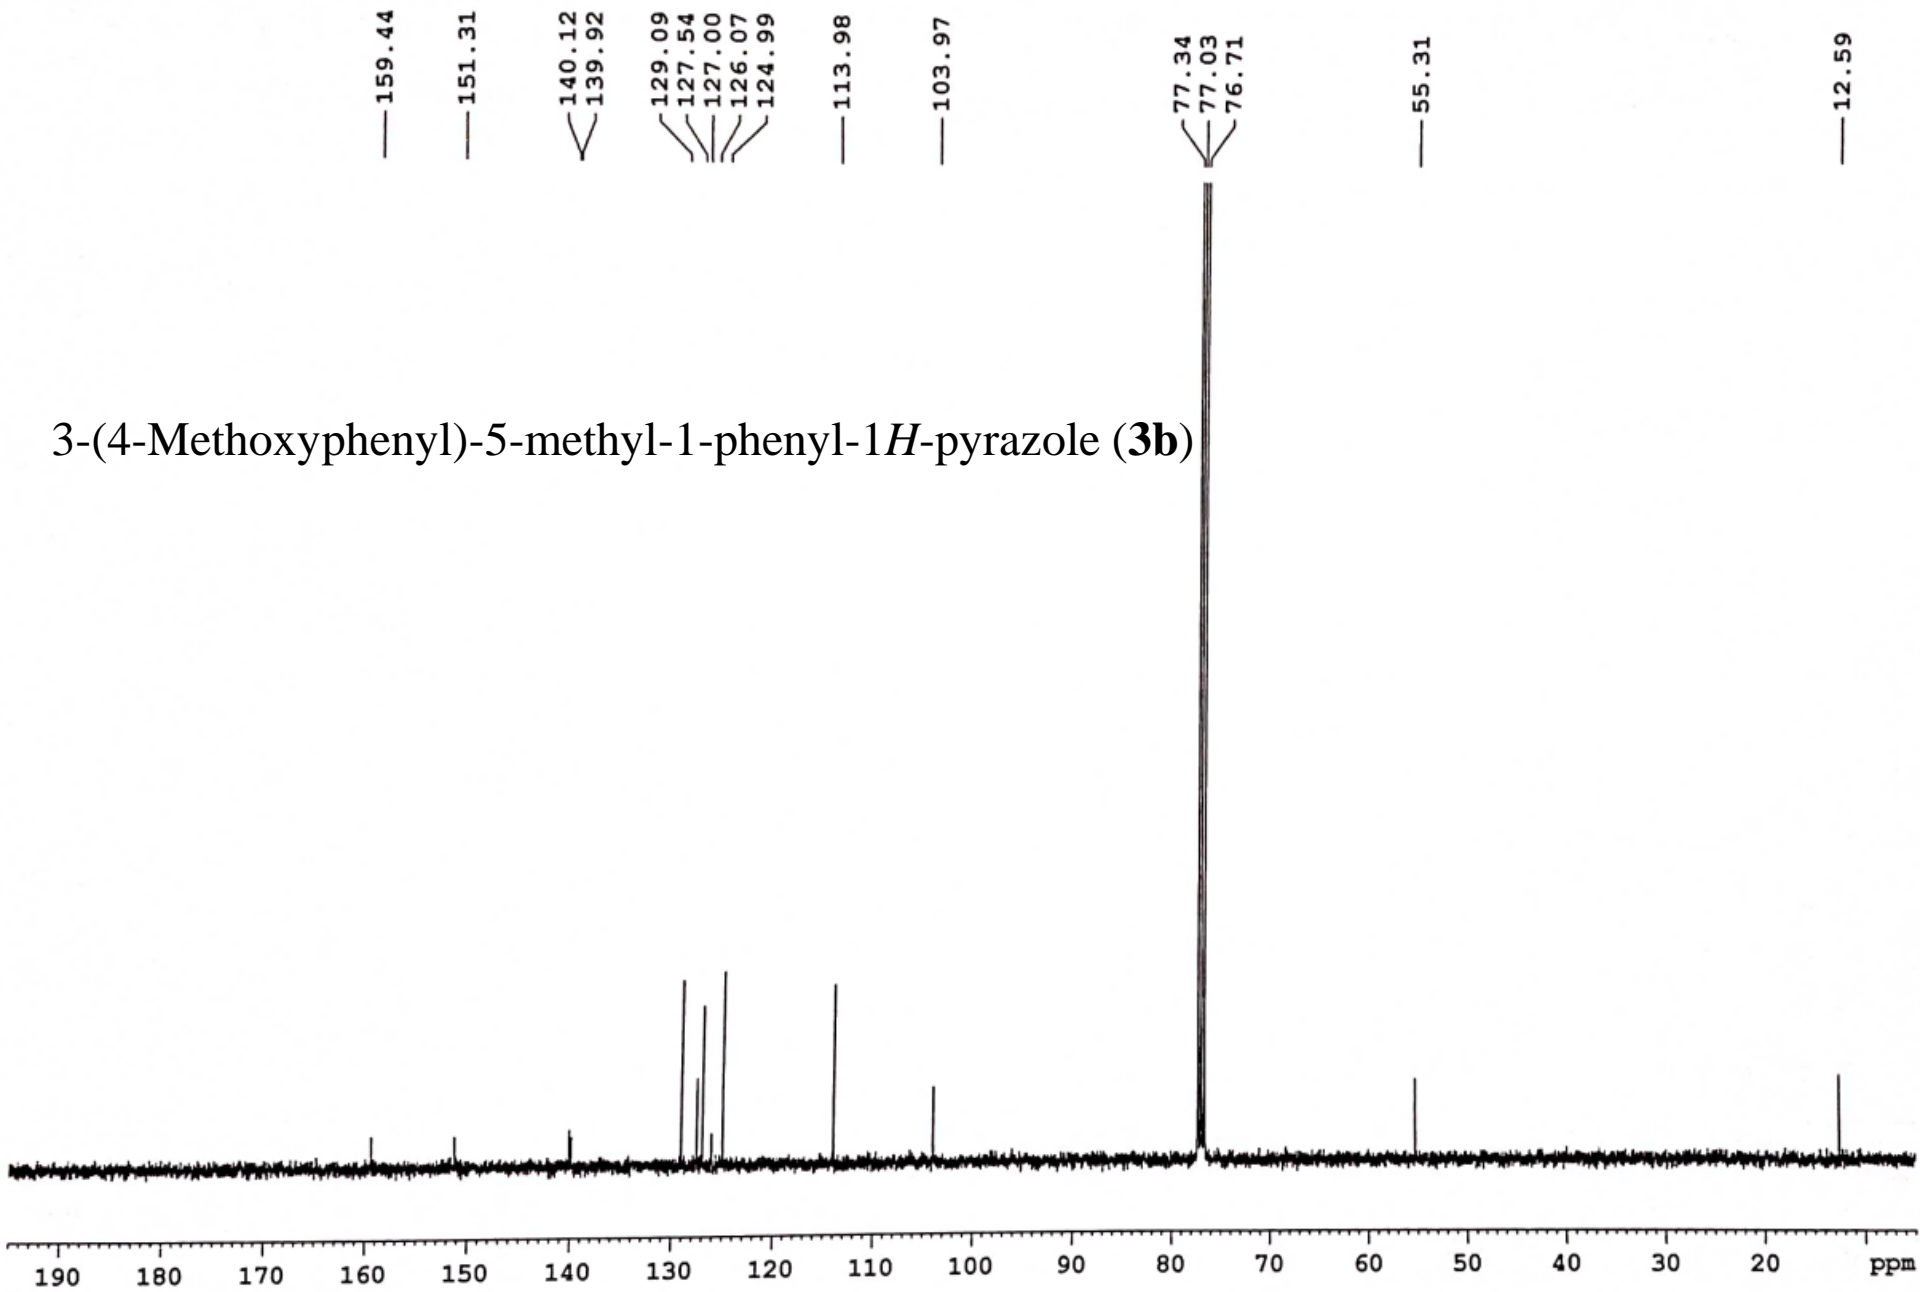

2-(5-Methyl-1-phenyl-1*H*-pyrazol-3-yl) phenol (**3c**)

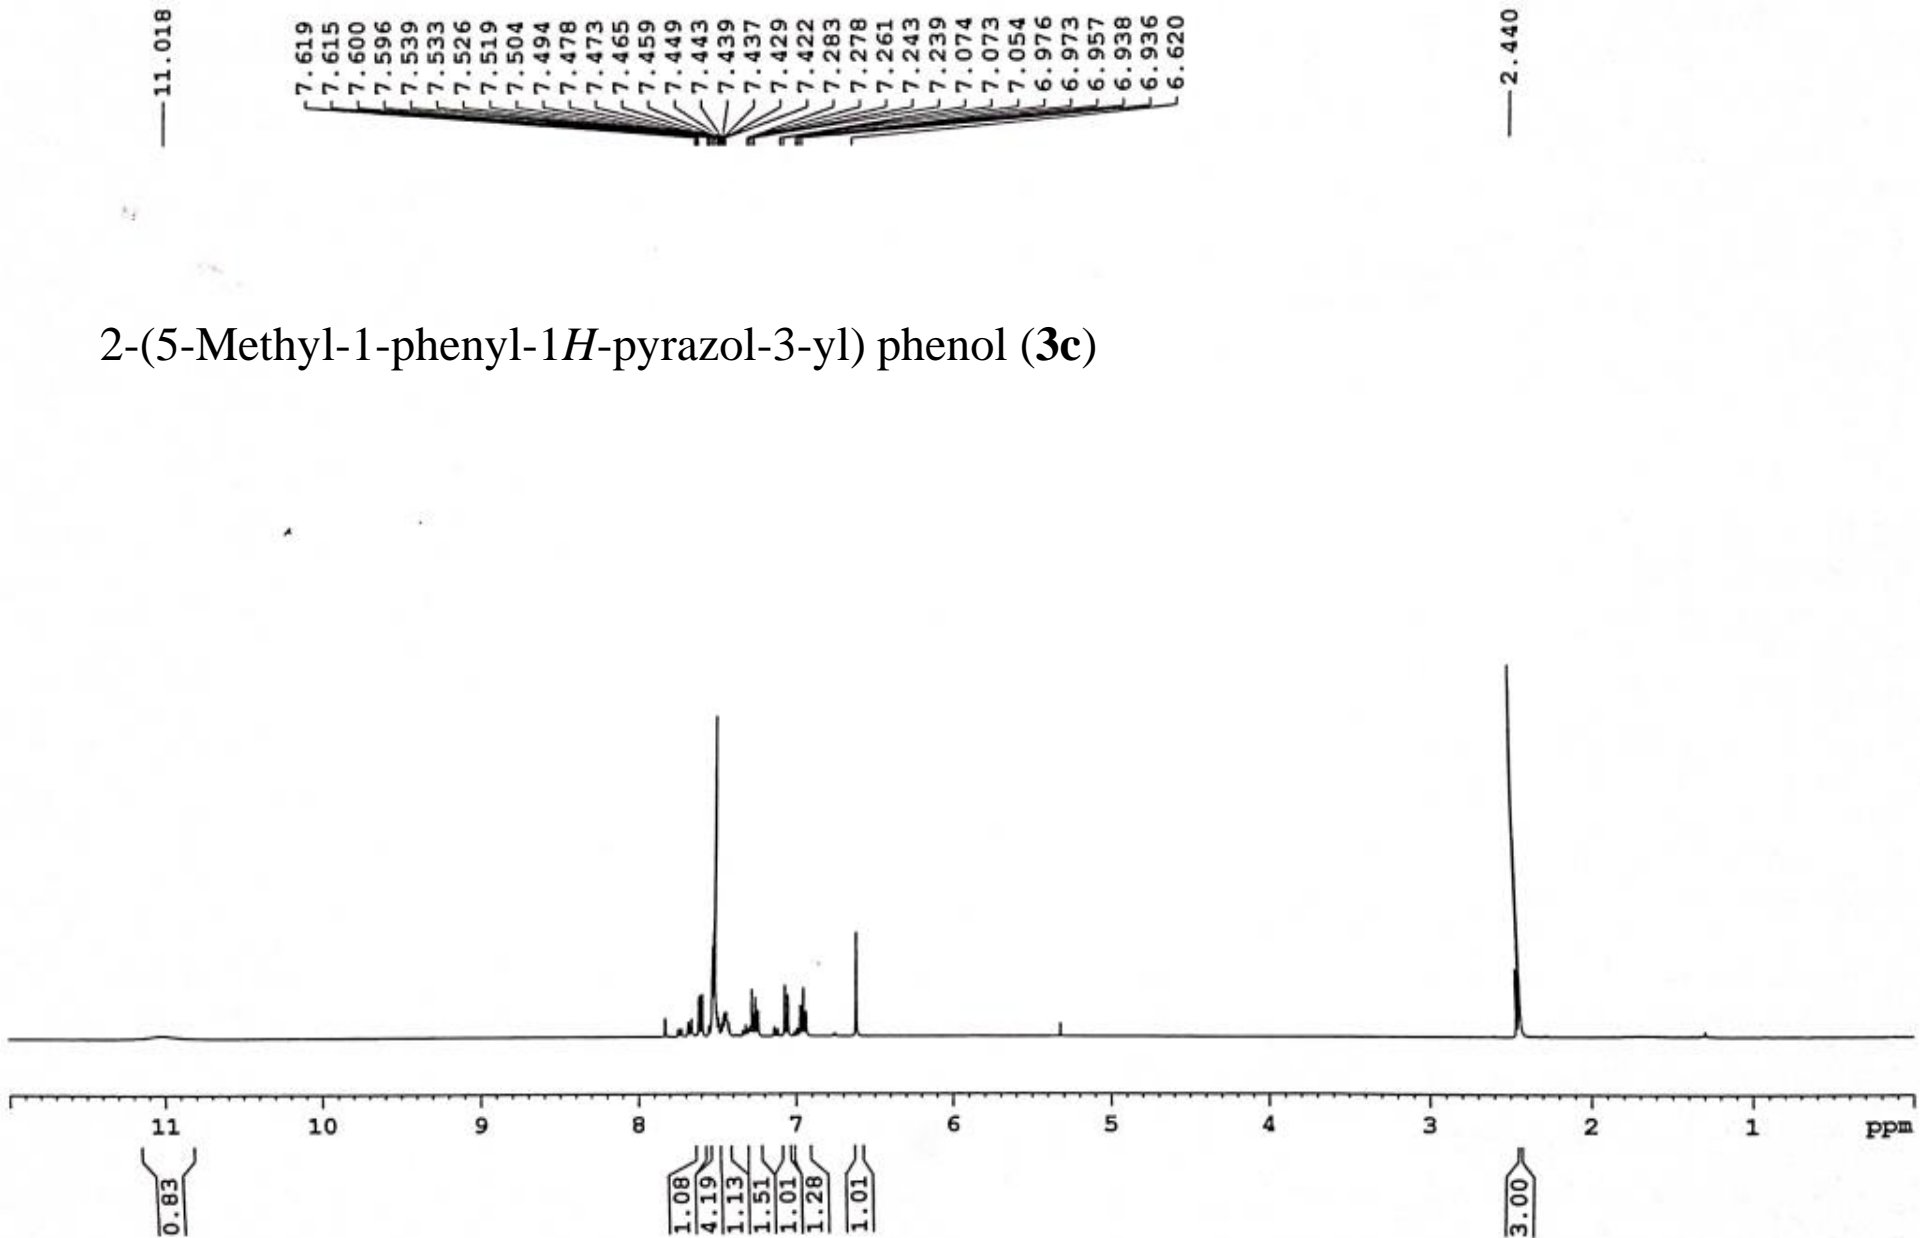

— 156.17  
— 151.54  
— 139.96  
— 139.14  
— 129.29  
— 129.23  
— 127.94  
— 126.42  
— 124.61  
— 119.24  
— 117.10  
— 116.47  
— 103.85  
— 77.40  
— 77.29  
— 77.08  
— 76.77  
— 12.49

2-(5-Methyl-1-phenyl-1*H*-pyrazol-3-yl) phenol (**3c**)

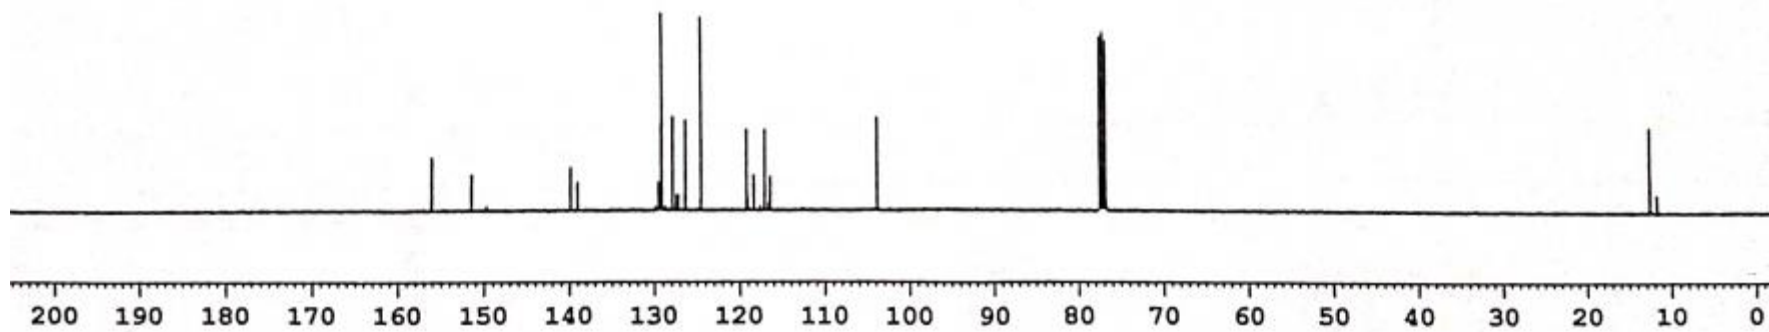

7.824  
7.803  
7.531  
7.526  
7.515  
7.401  
7.380  
7.284

— 6.521

— 2.402

3-(4-Chlorophenyl)-5-methyl-1-phenyl-1*H*-pyrazole (**3d**)

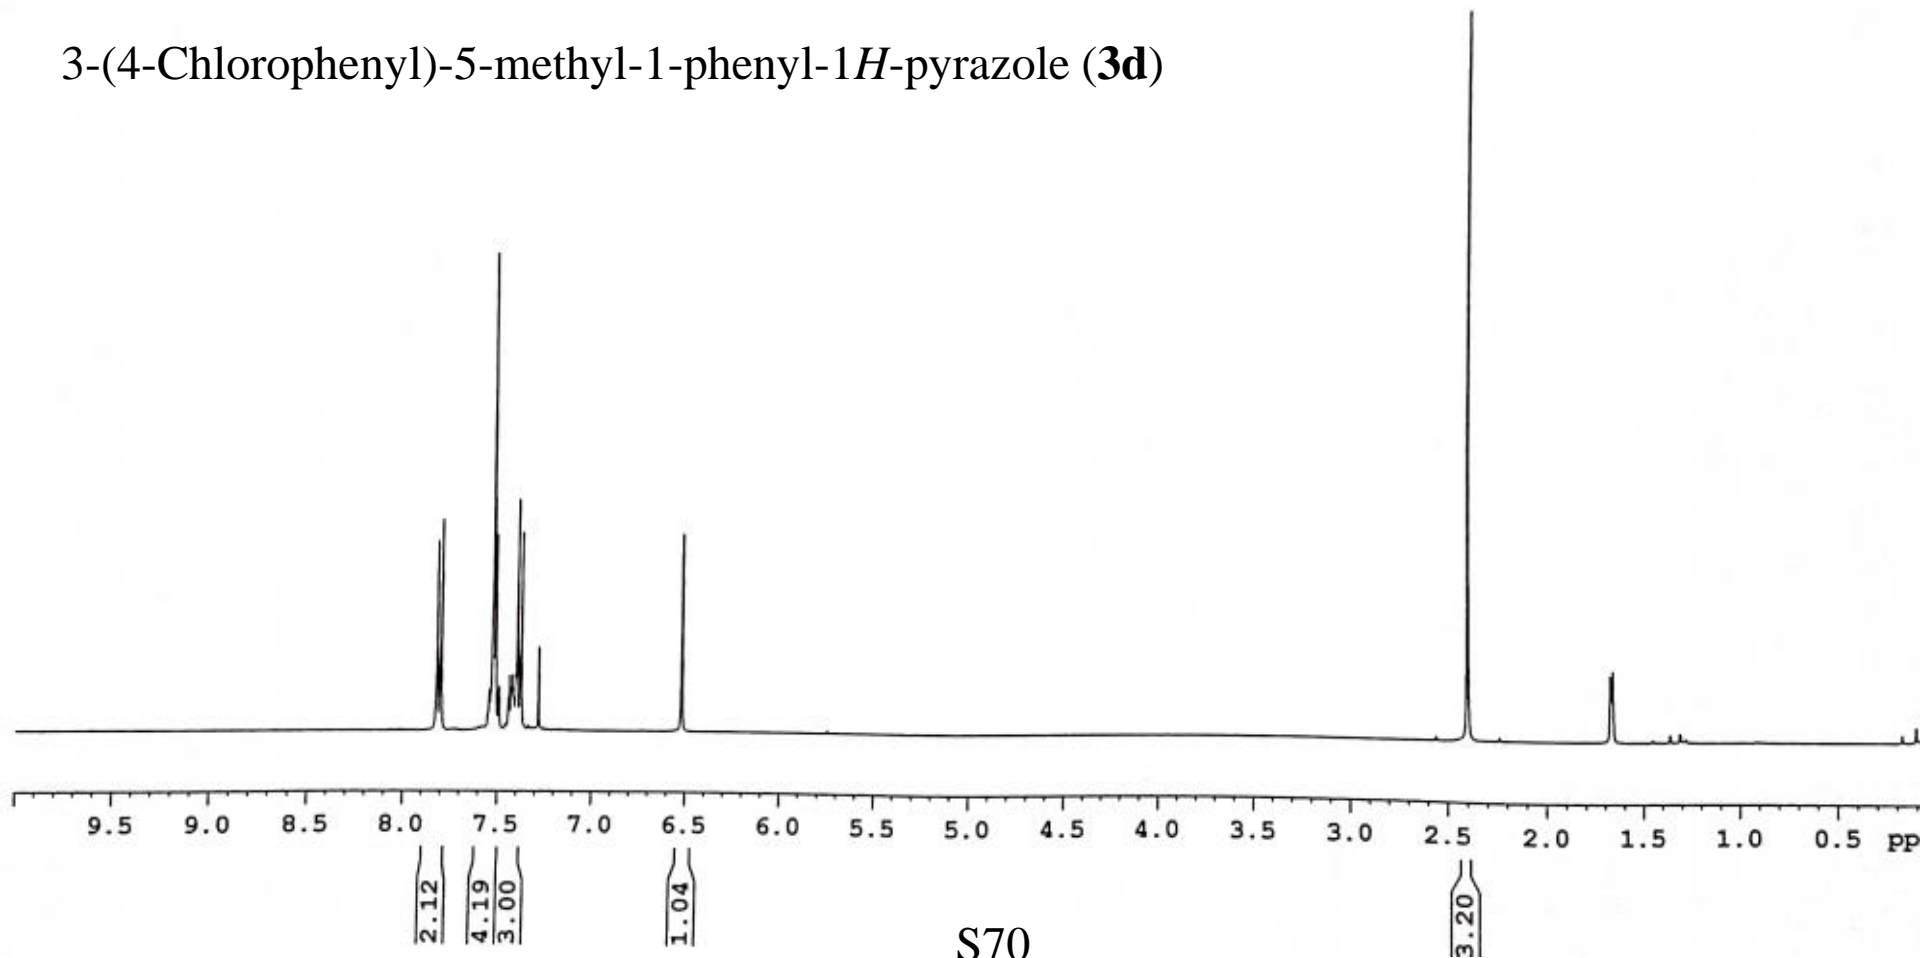

S70

3-(4-Chlorophenyl)-5-methyl-1-phenyl-1*H*-pyrazole (**3d**)

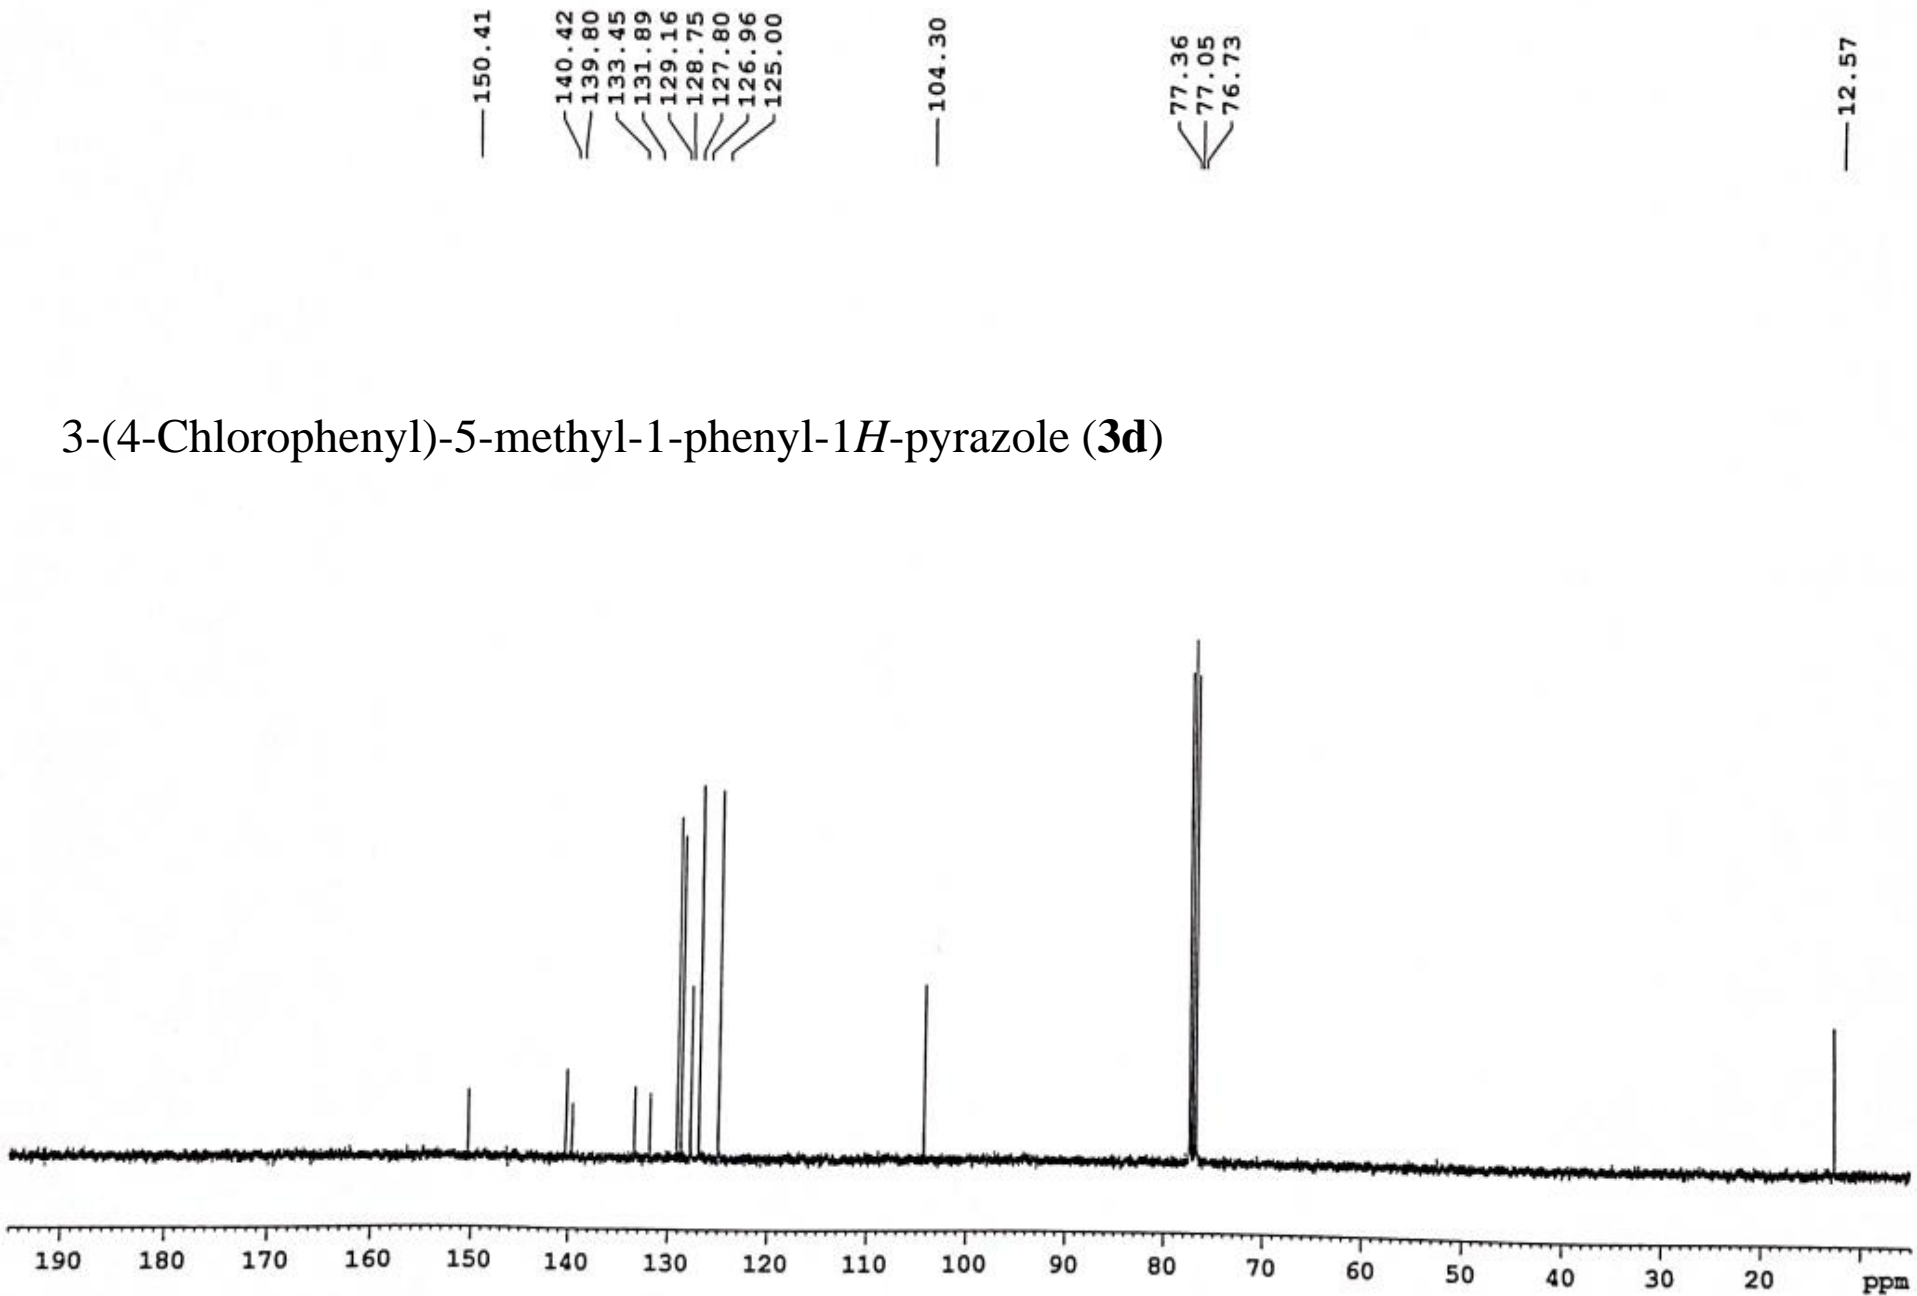

5-Methyl-1-phenyl-3-(thiophen-2-yl)-1*H*-pyrazole (**3e**)

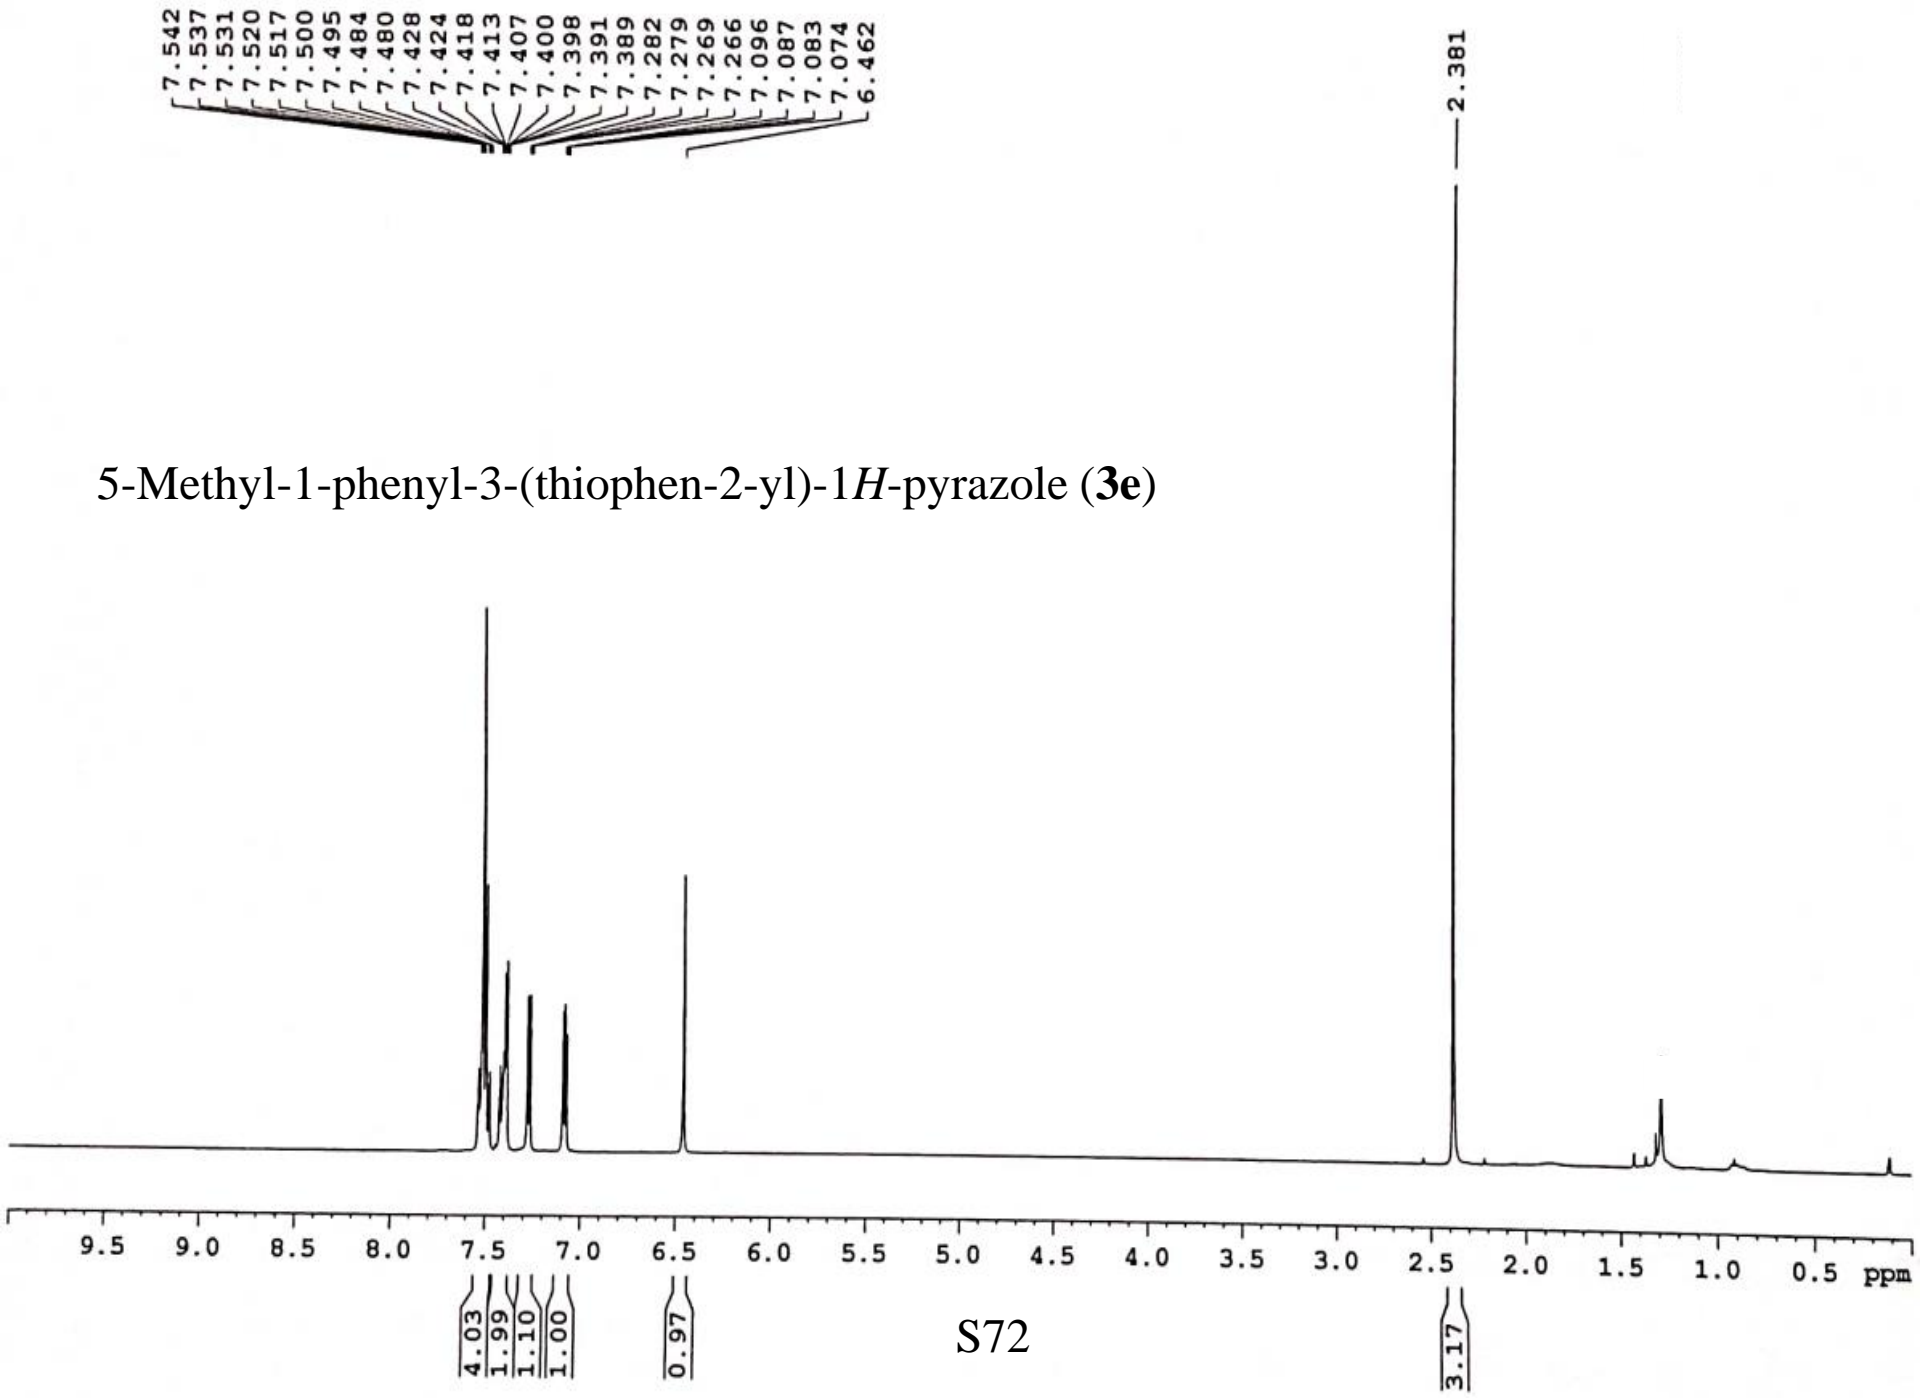



5-Methyl-1-phenyl-3-(thiophen-2-yl)-1*H*-pyrazole (**3e**)

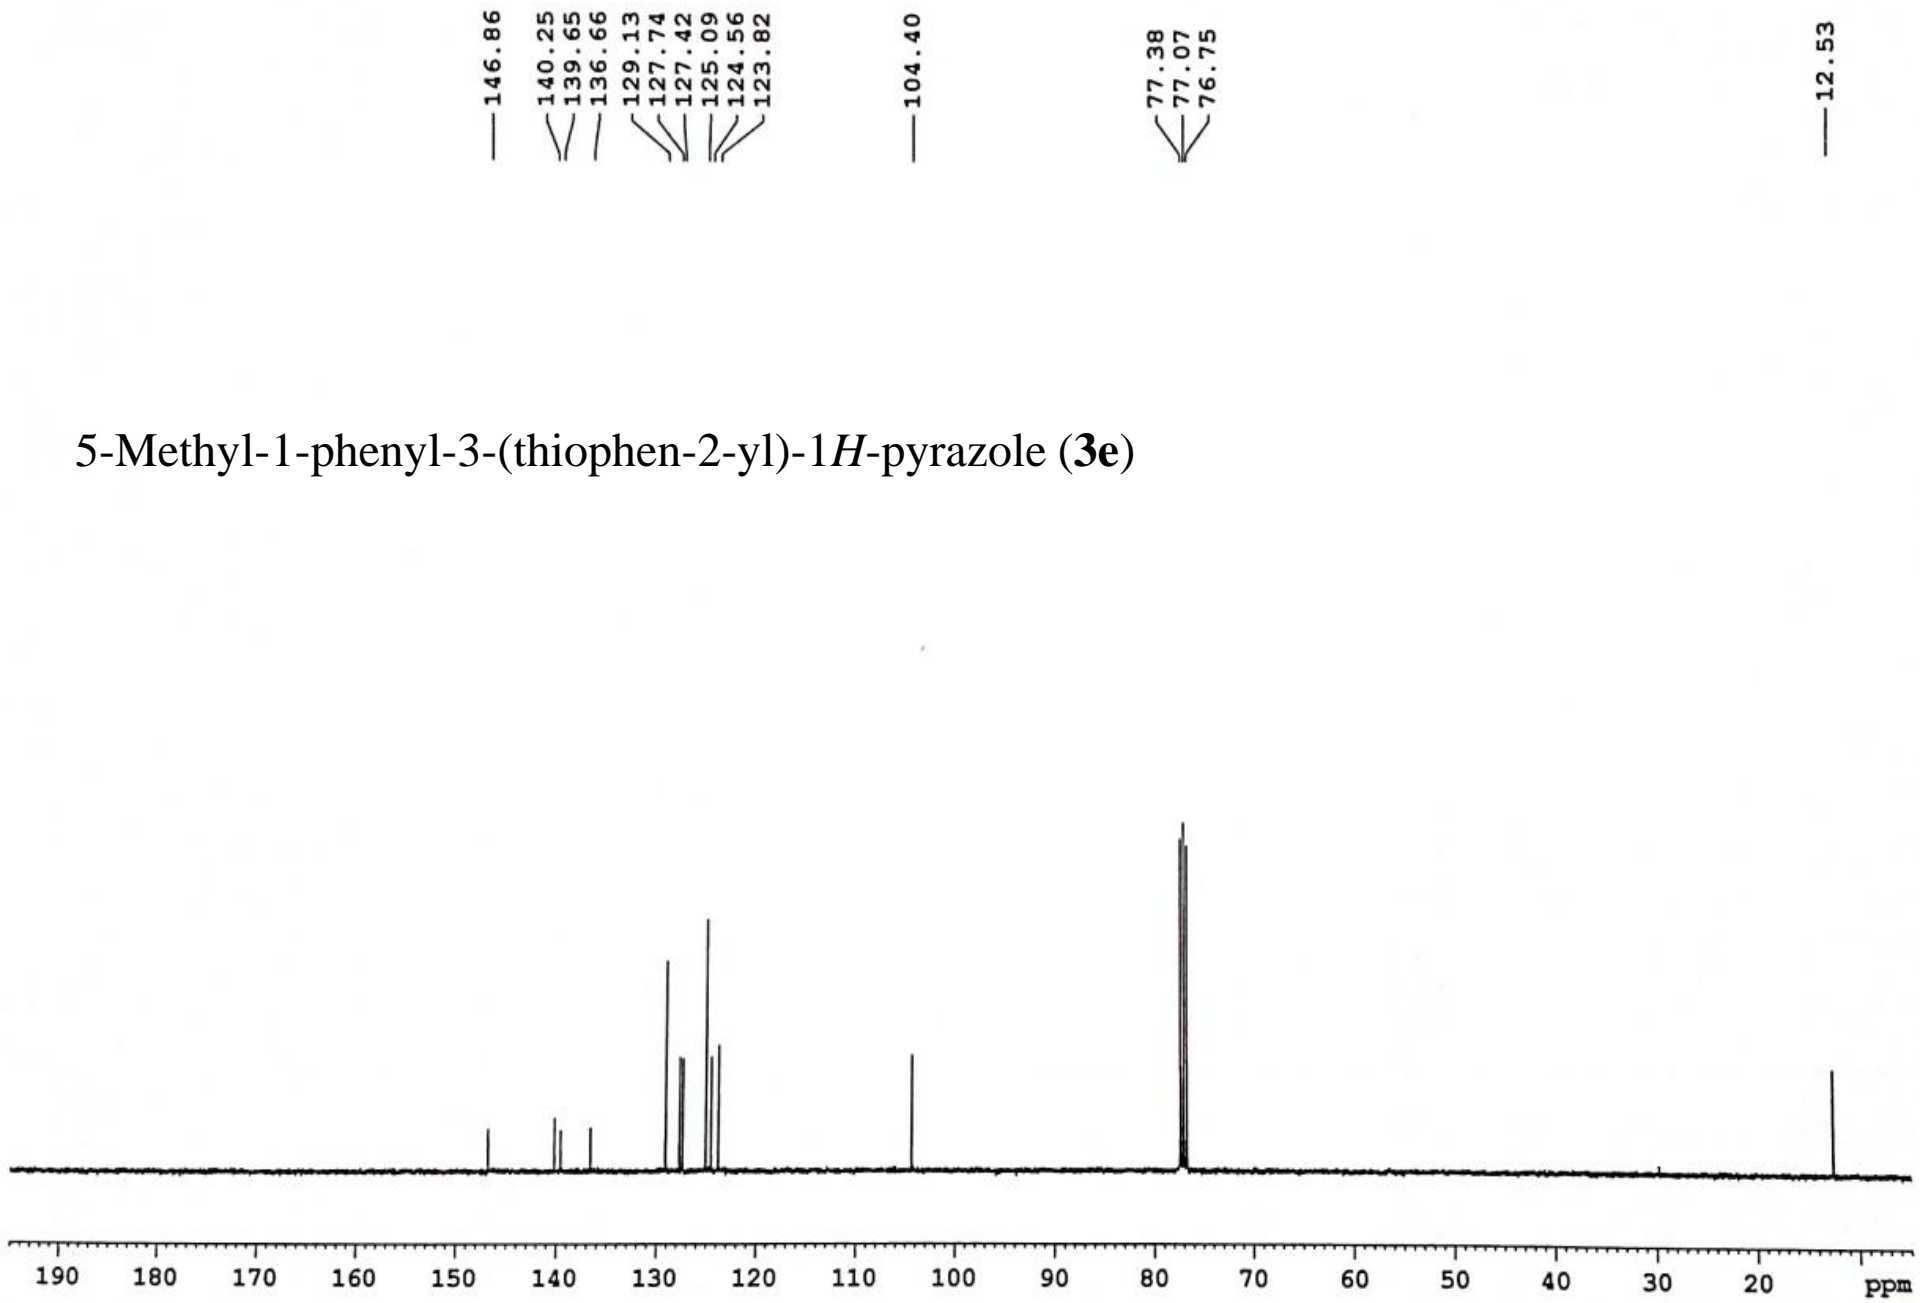

7.825  
7.819  
7.815  
7.803  
7.798  
7.792  
7.448  
7.414  
7.394  
7.377  
7.373  
7.318  
7.298  
7.284  
6.500  
6.499

2.444  
2.372  
2.371

3-(4-Chlorophenyl)-5-methyl-1-p-tolyl-1H-pyrazole (**3f**)

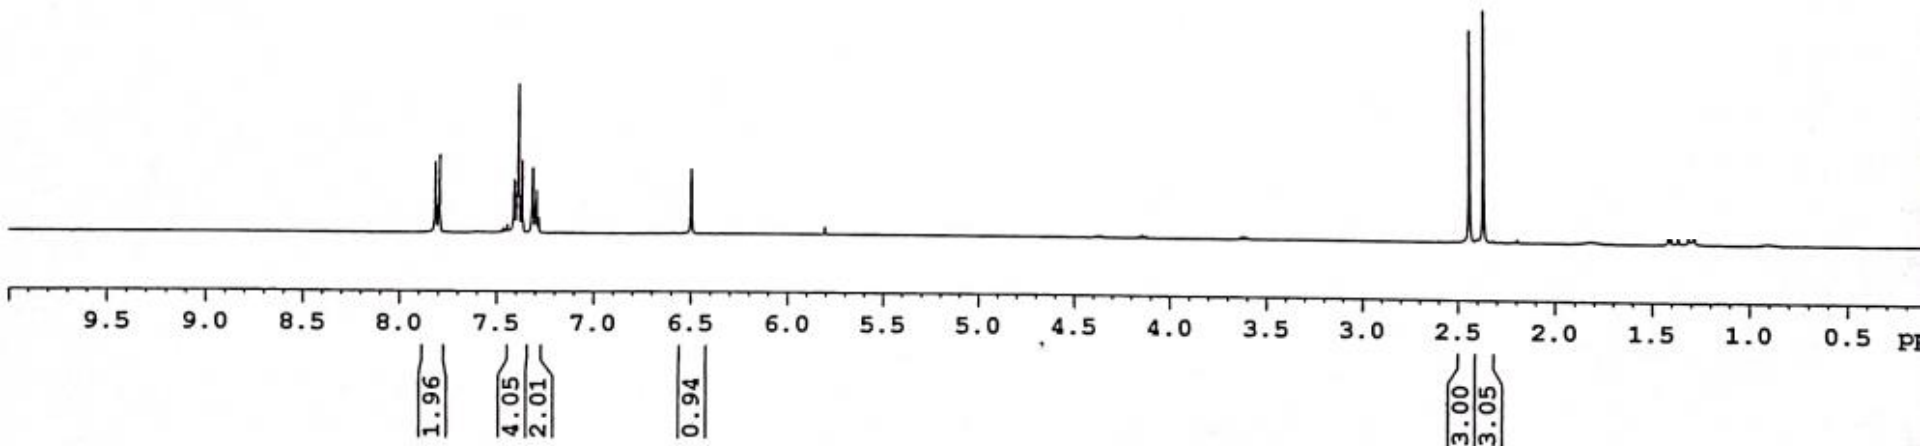

— 150.15  
— 140.41  
— 137.81  
— 137.31  
— 133.37  
— 131.97  
— 129.70  
— 128.72  
— 126.95  
— 124.94  
  
— 104.01  
  
— 77.37  
— 77.05  
— 76.73  
  
— 21.14  
— 12.46

3-(4-Chlorophenyl)-5-methyl-1-p-tolyl-1H-pyrazole (**3f**)

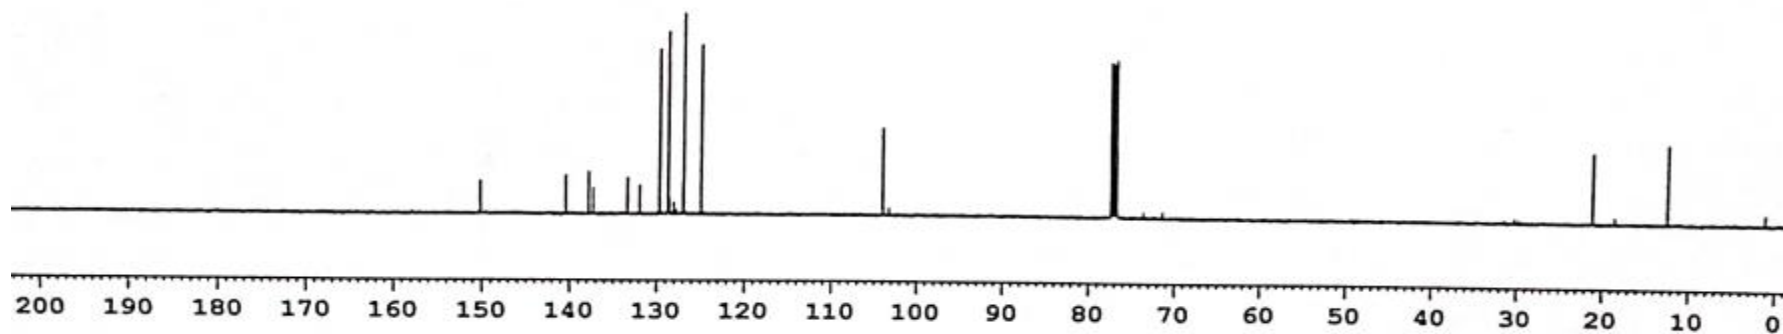

7.883  
7.864  
7.519  
7.512  
7.496  
7.490  
7.474  
7.468  
7.454  
7.435  
7.416  
7.406  
7.401  
7.366  
7.348  
7.329  
7.284  
6.558

— 2.405

1-(4-Chlorophenyl)-5-methyl-3-phenyl-1*H*-pyrazole (**3g**)

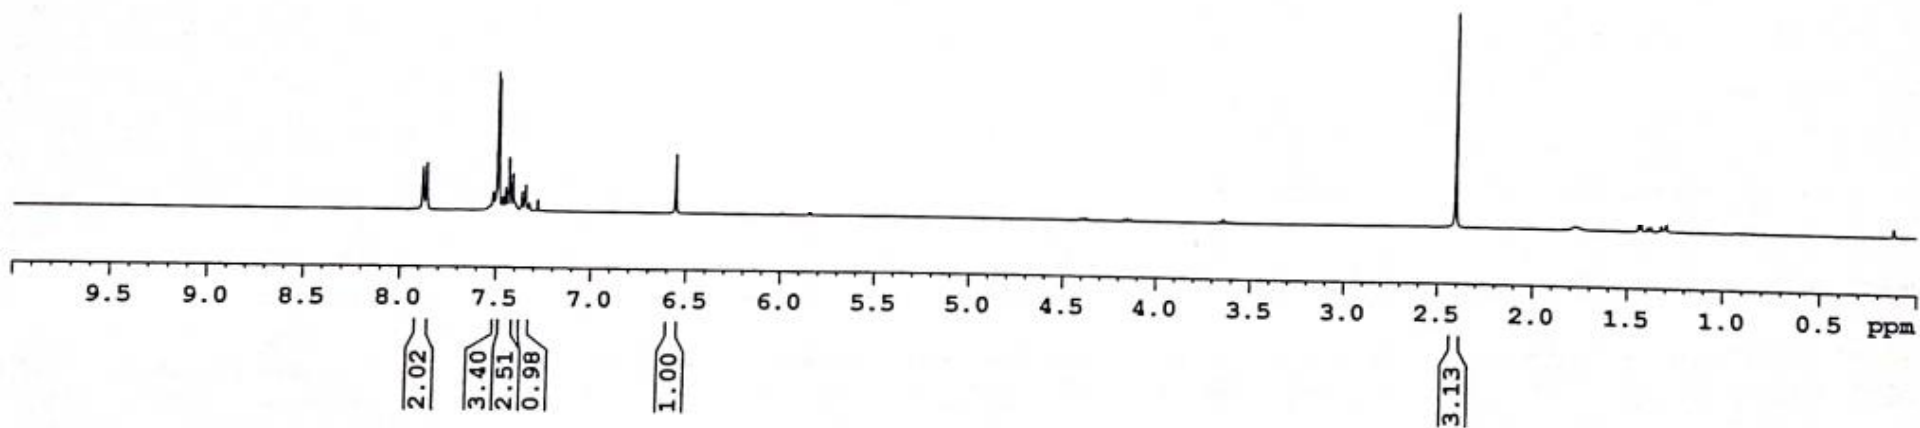

1-(4-Chlorophenyl)-5-methyl-3-phenyl-1*H*-pyrazole (**3g**)

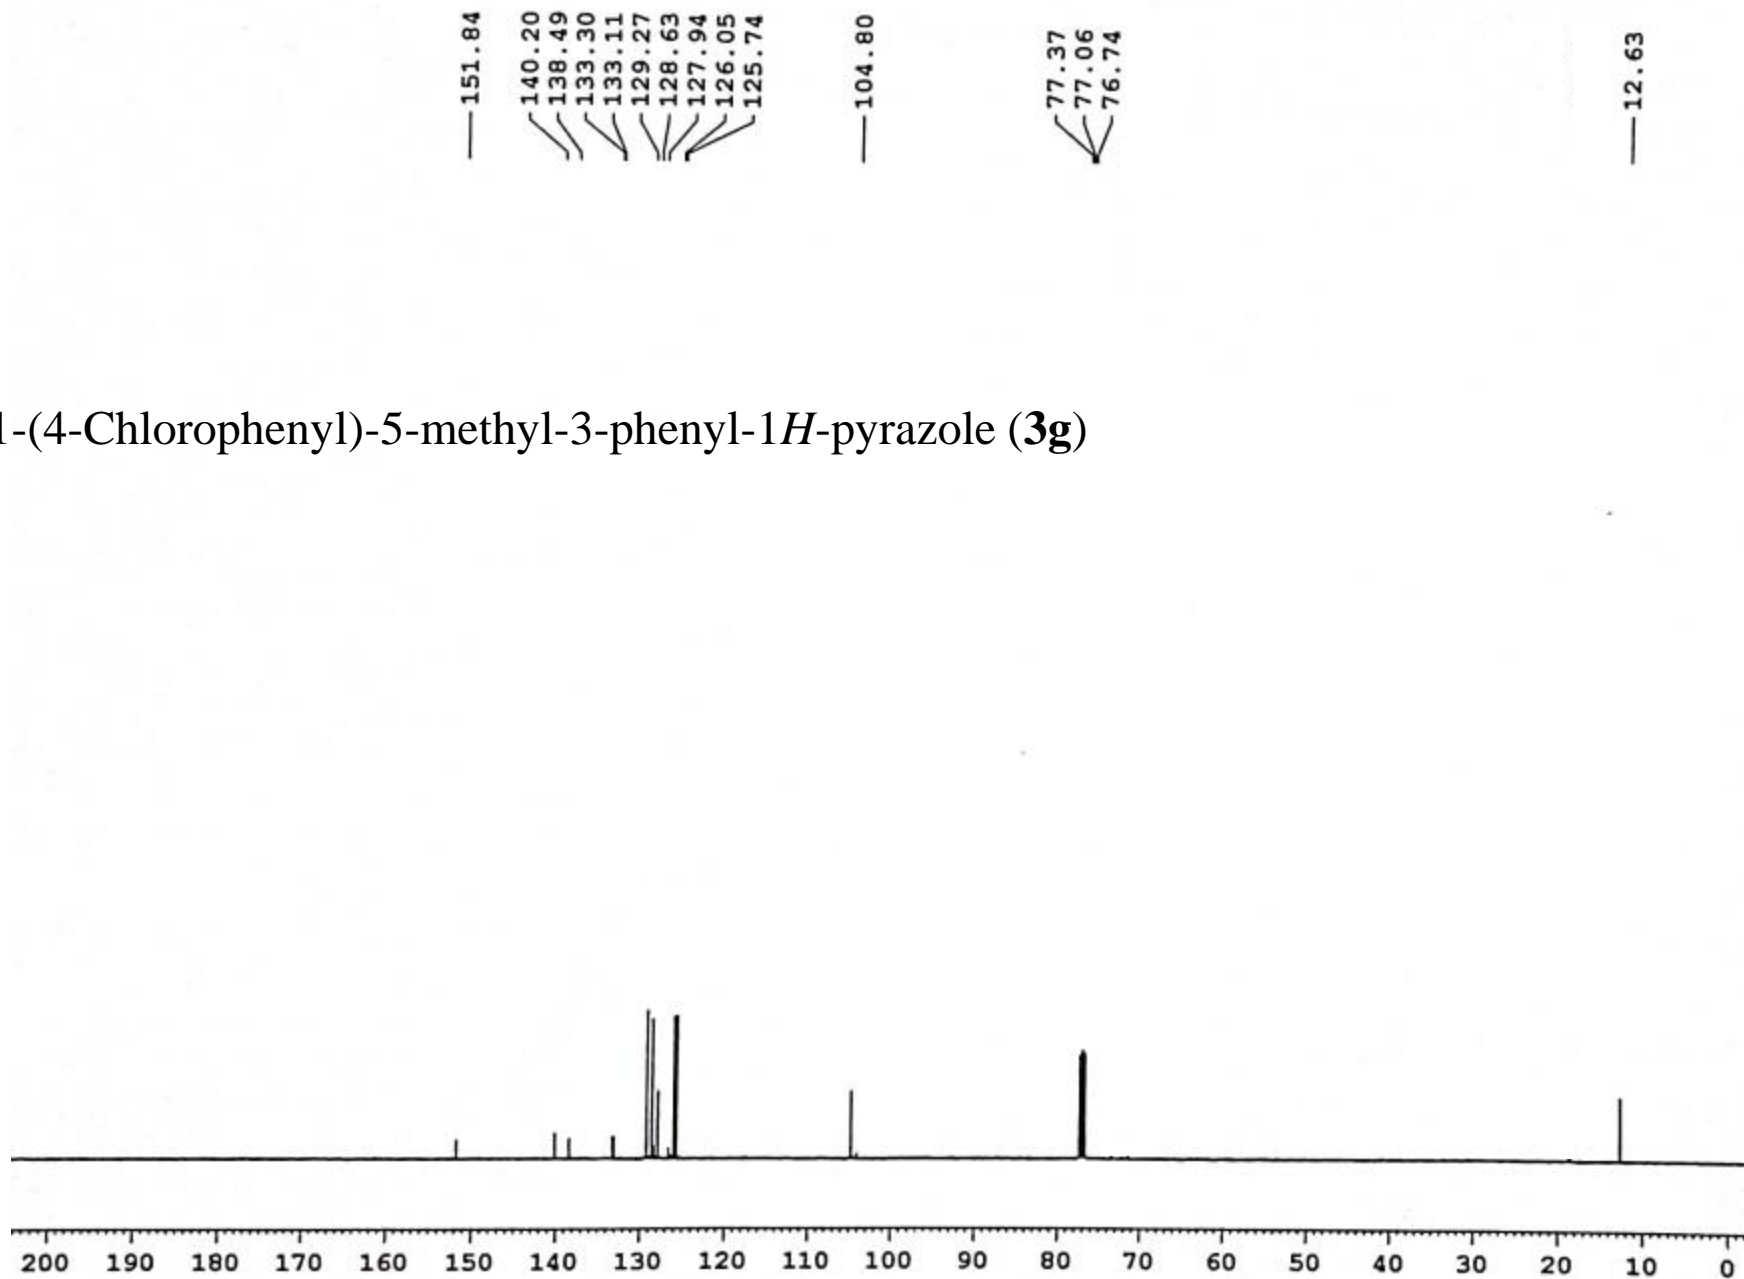

1-(4-Bromophenyl)-5-methyl-3-phenyl-1*H*-pyrazole (**3h**)

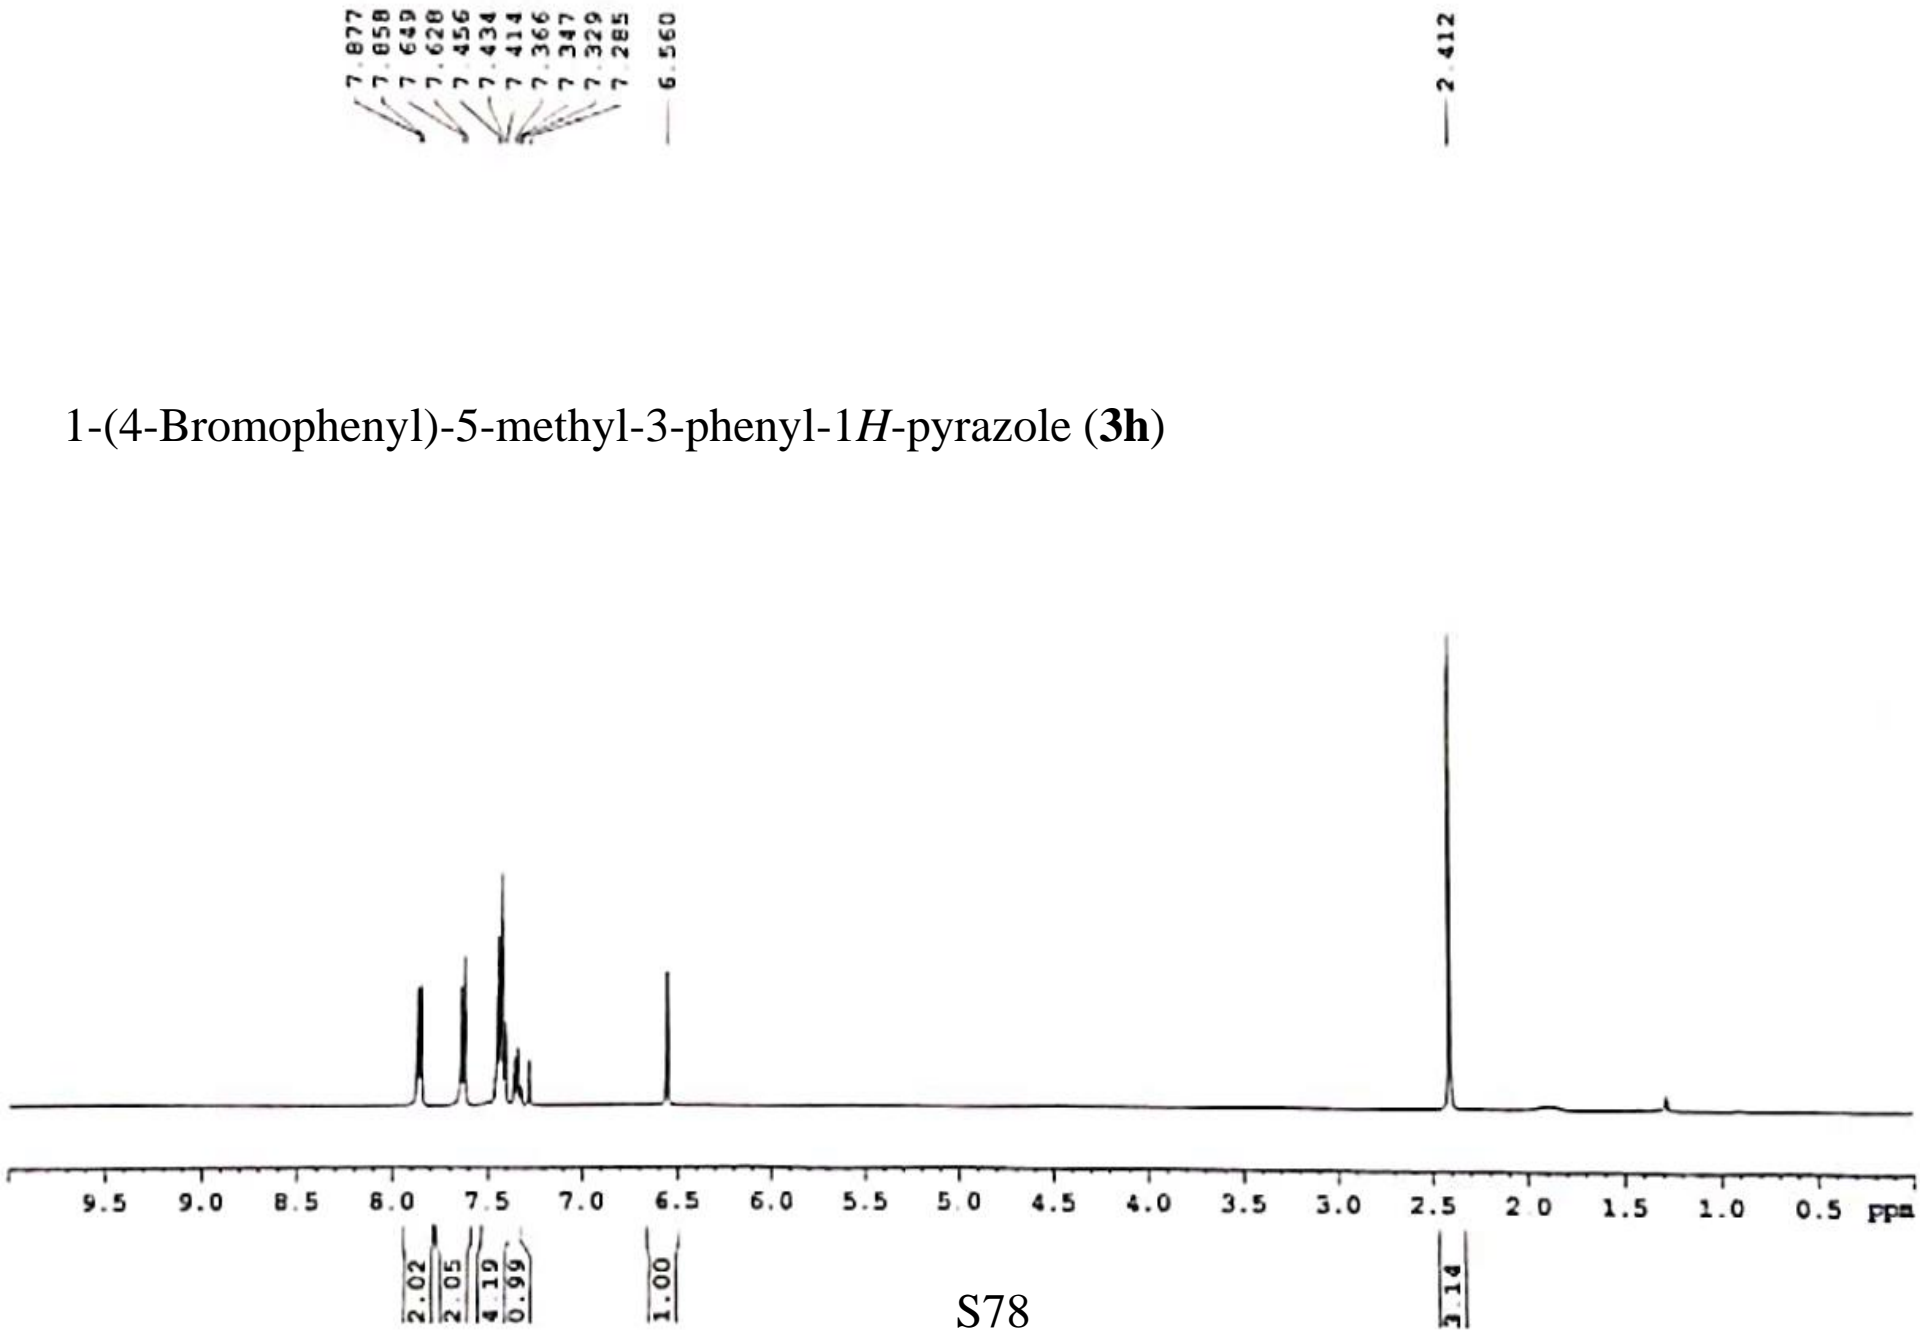

— 151.86  
140.20  
138.93  
133.03  
132.25  
128.64  
127.98  
126.33  
125.74  
121.23

— 104.87

77.36  
77.05  
76.73

— 12.67

1-(4-Bromophenyl)-5-methyl-3-phenyl-1*H*-pyrazole (**3h**)

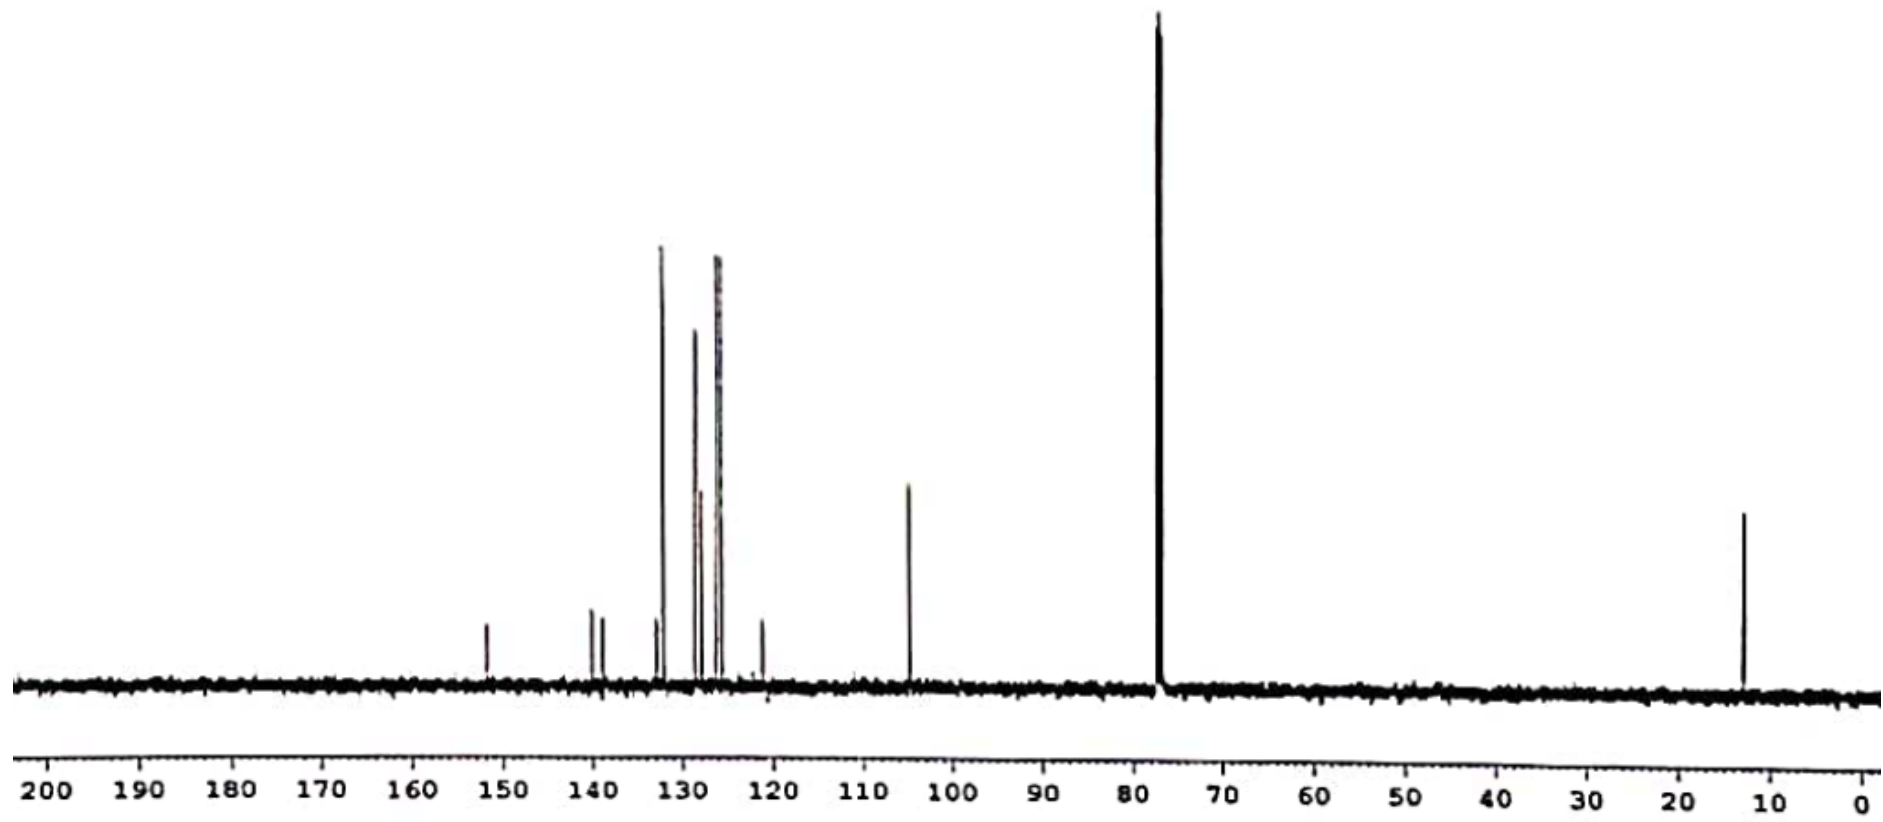

(1,3-Diphenyl-1*H*-pyrazol-5-yl)methanol (**3i**)

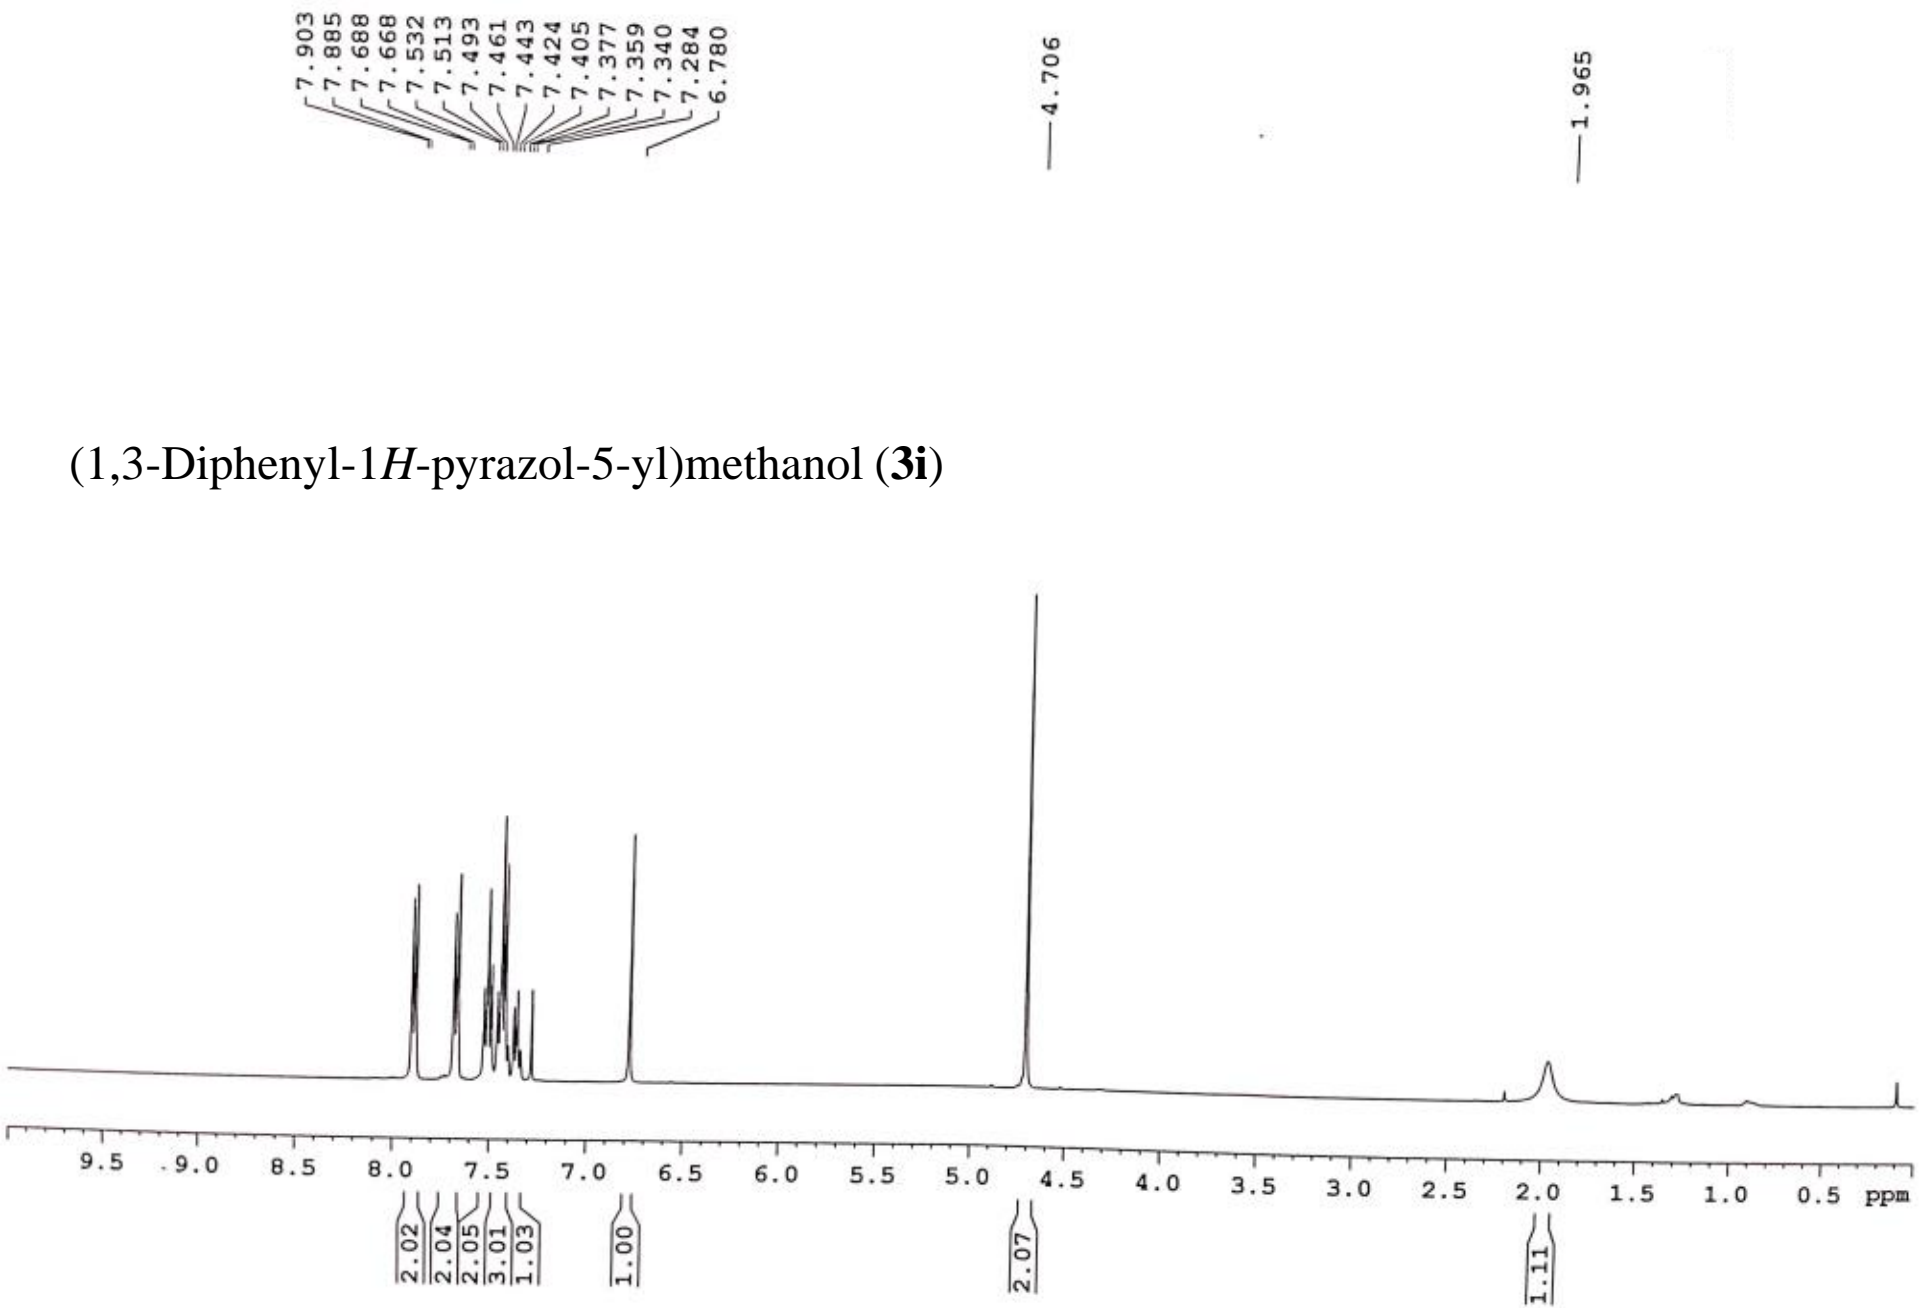



151.73  
143.31  
139.51  
132.88  
129.29  
128.68  
128.07  
127.98  
125.79  
124.53  
104.94  
77.36  
77.04  
76.72  
55.86

(1,3-Diphenyl-1*H*-pyrazol-5-yl)methanol (**3i**)

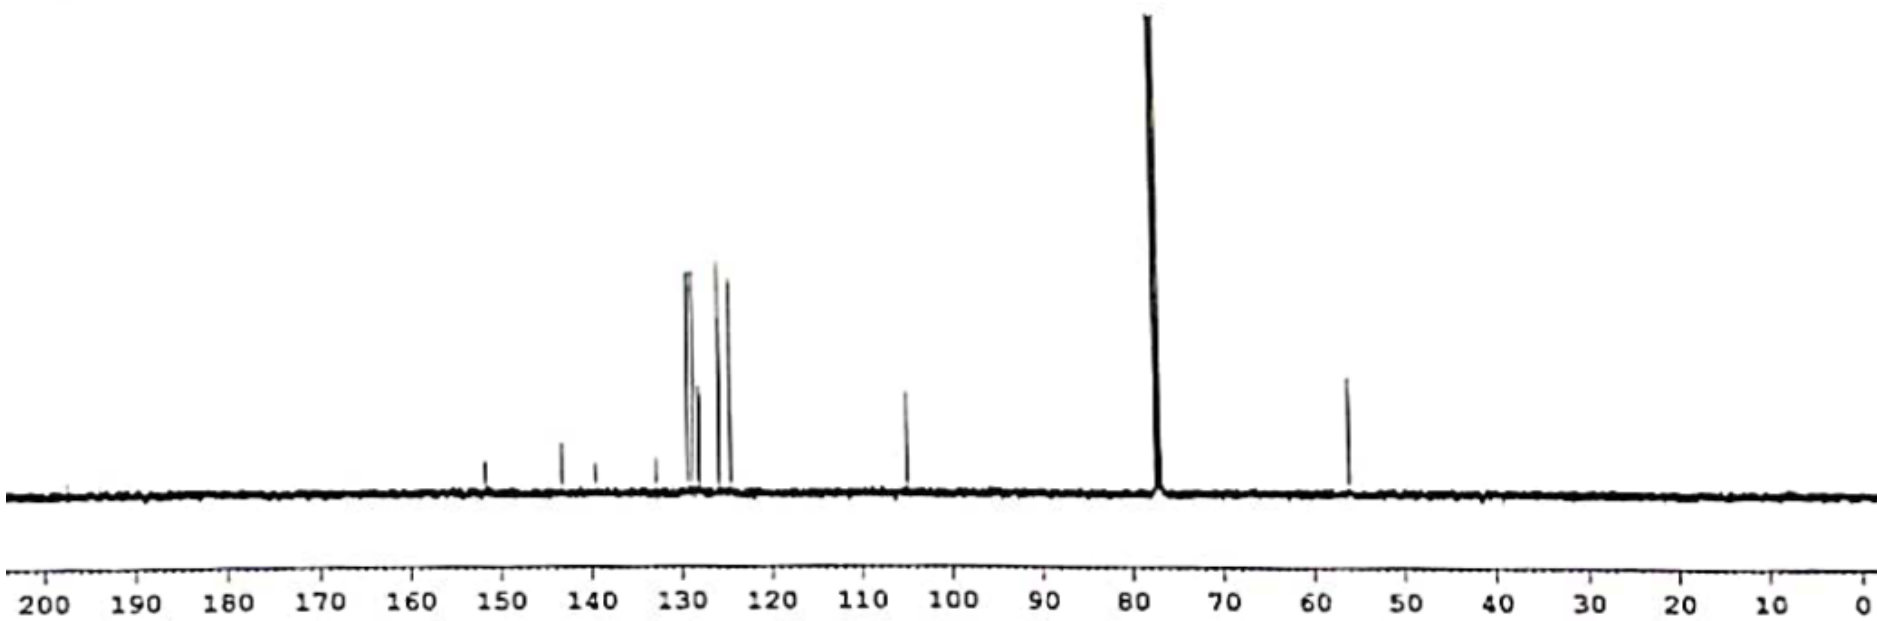

S81

(3-(4-Chlorophenyl)-1-phenyl-1*H*-pyrazol-5-yl)methanol (**3j**)

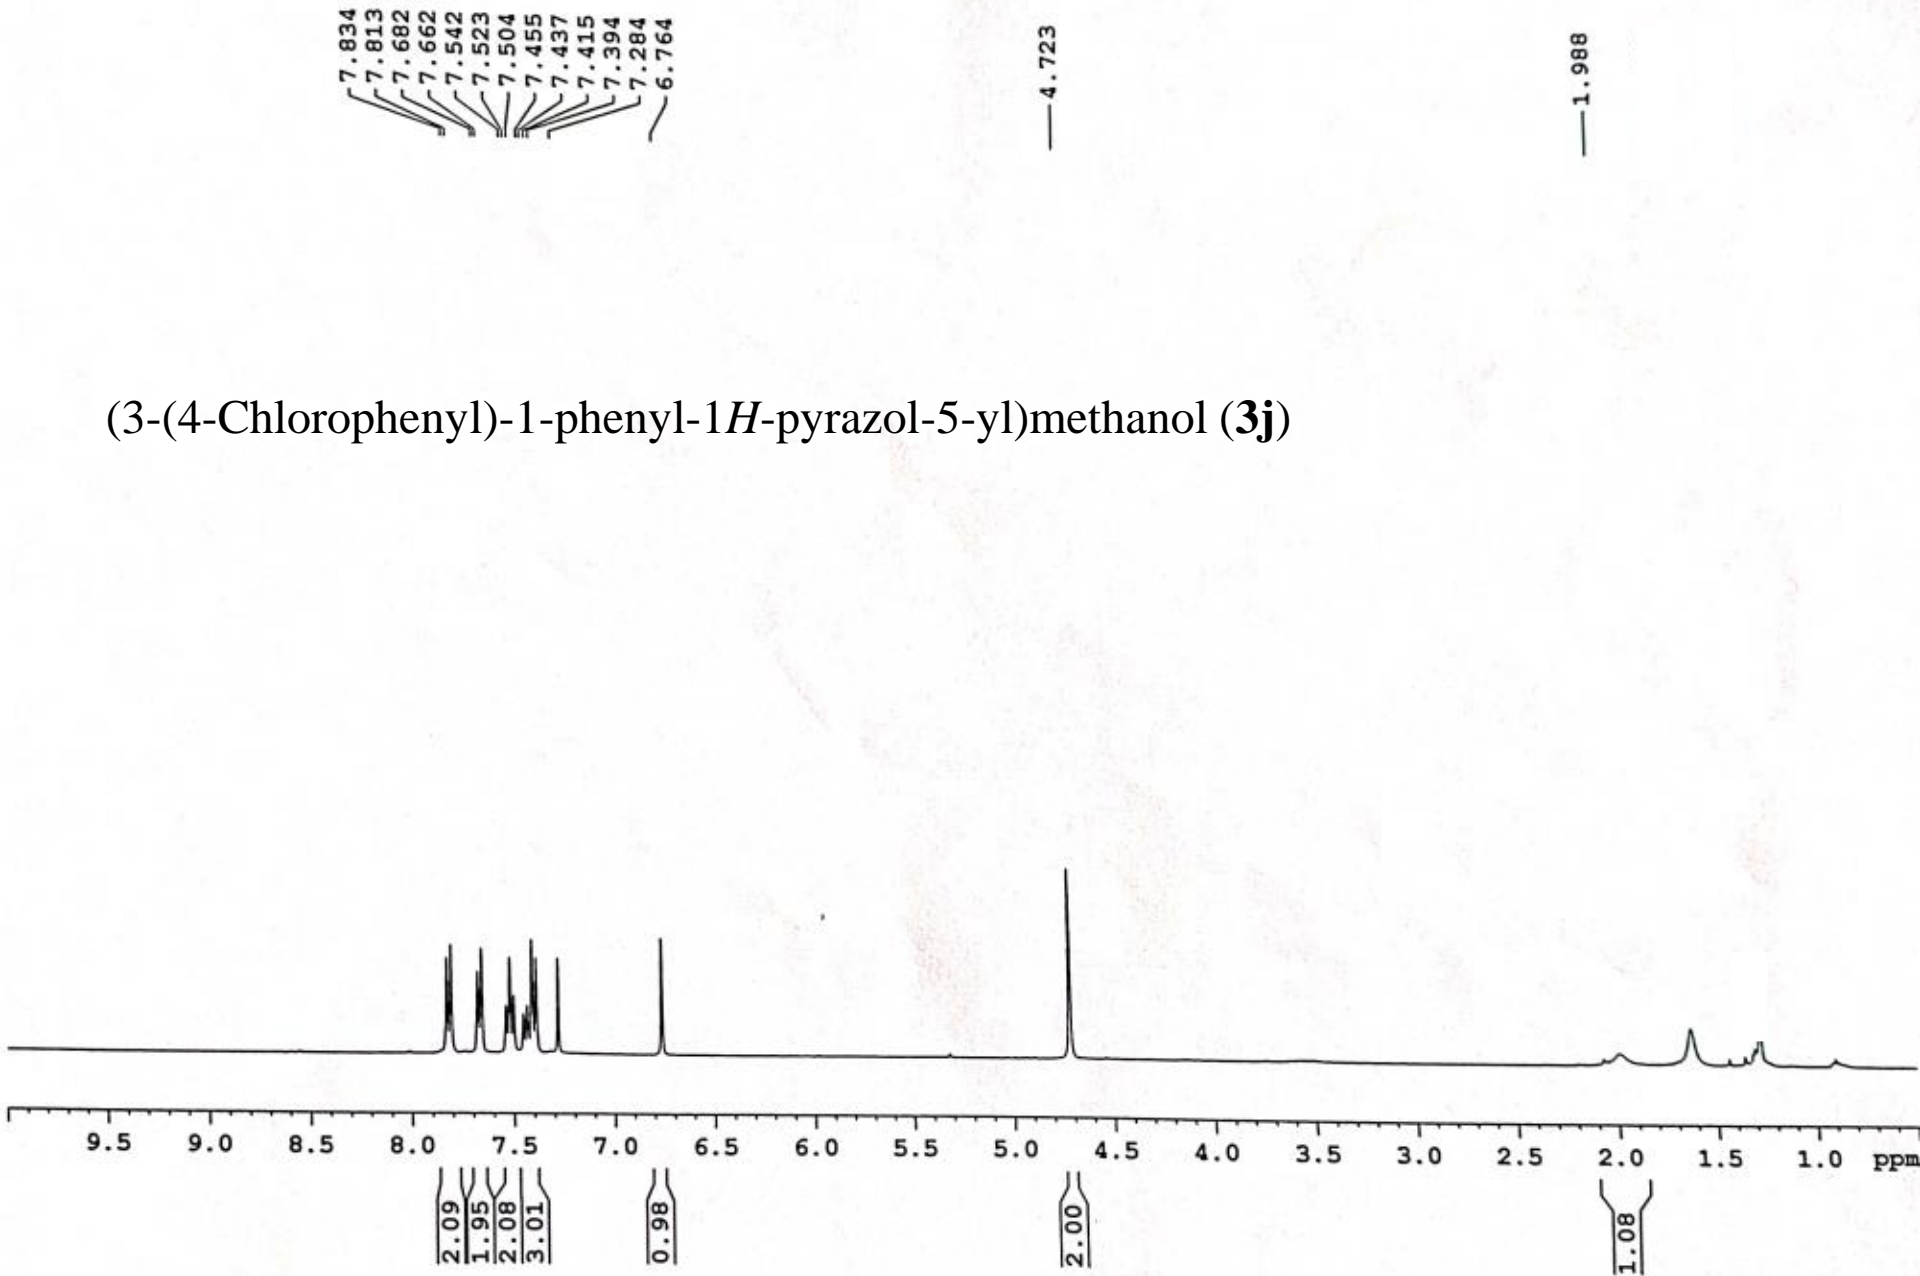

(3-(4-Chlorophenyl)-1-phenyl-1*H*-pyrazol-5-yl)methanol (**3j**)

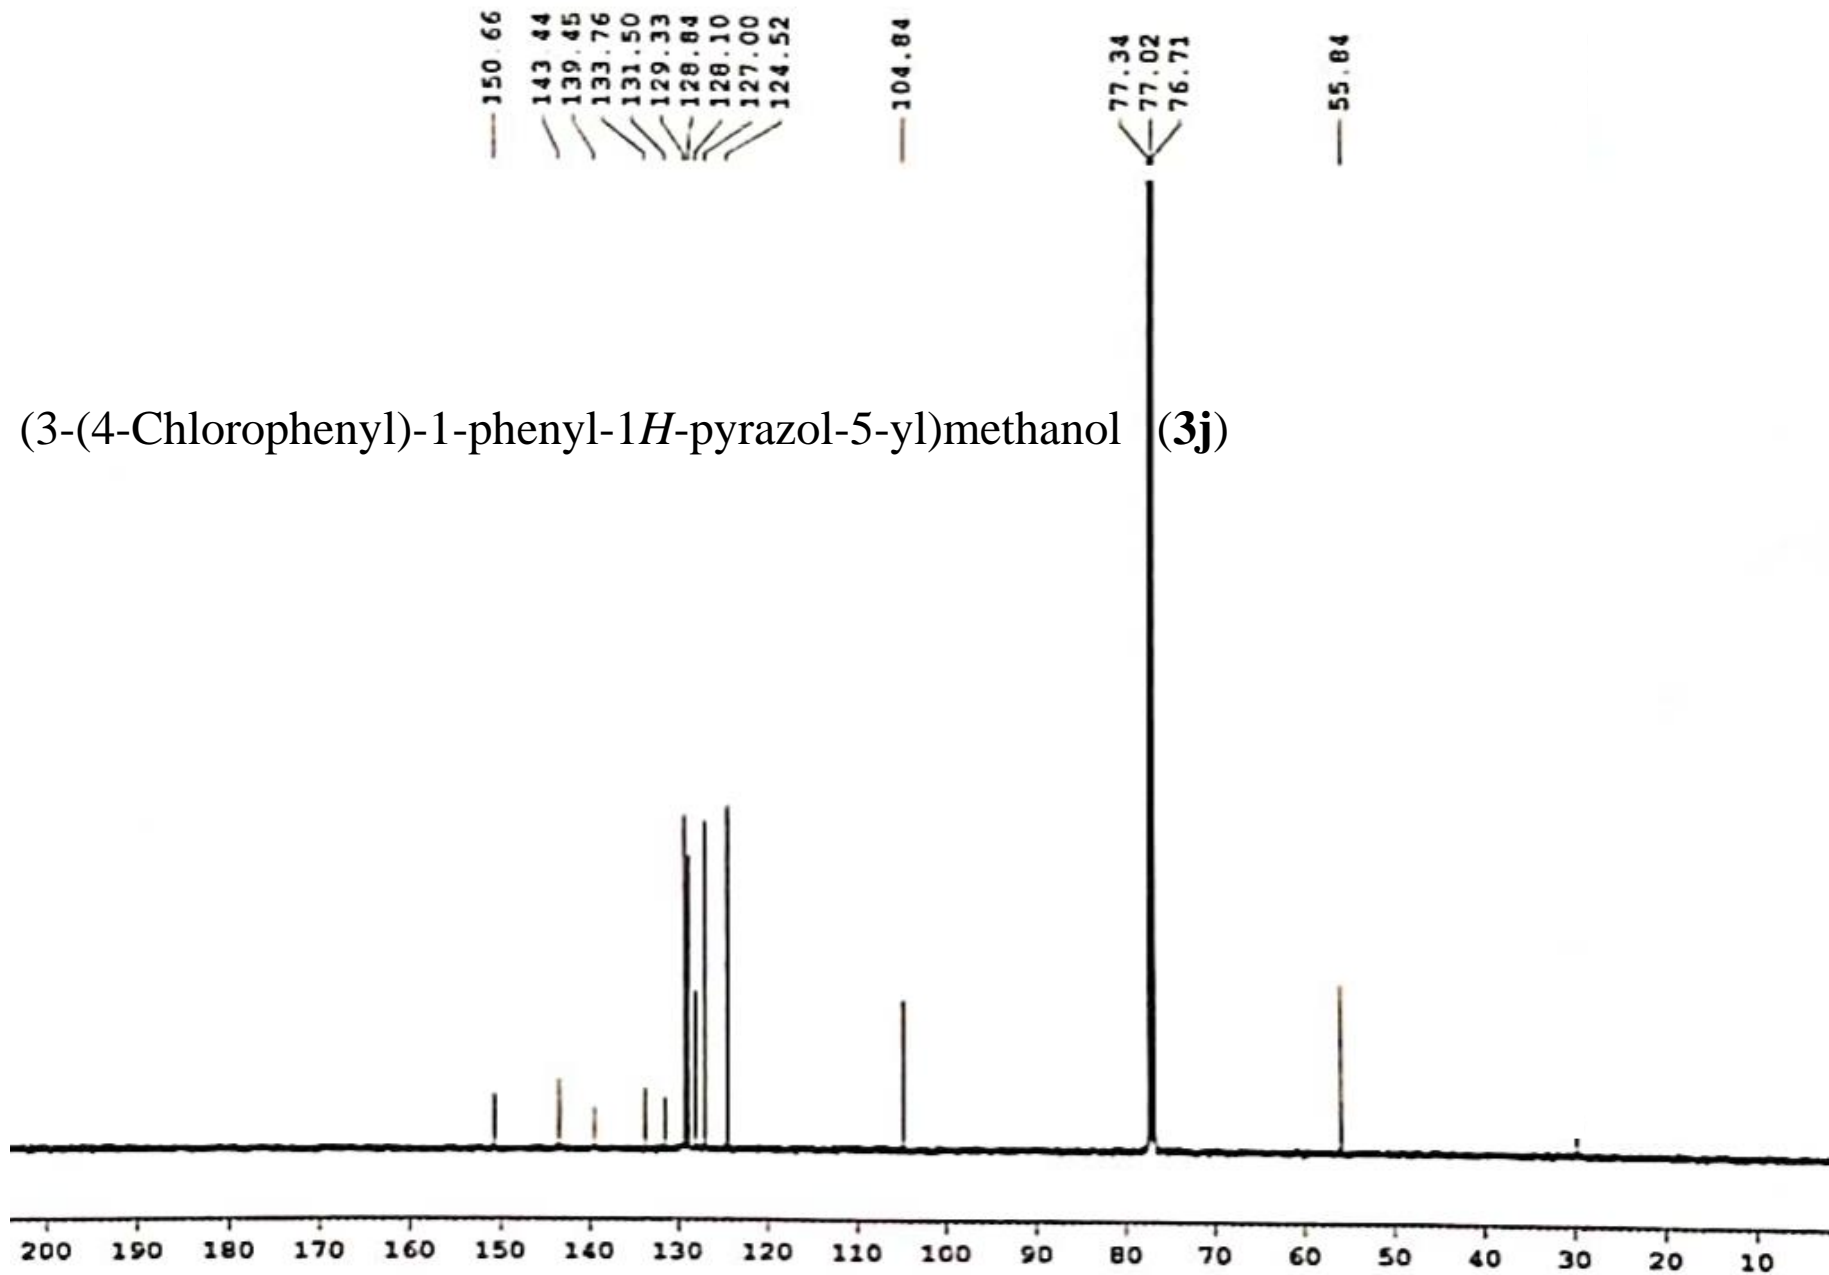

7.770  
7.750  
7.675  
7.655  
7.567  
7.546  
7.520  
7.501  
7.454  
7.436  
7.418  
7.285  
6.760

4.714

1.808

(3-(4-Bromophenyl)-1-phenyl-1*H*-pyrazol-5-yl)methanol (**3k**)

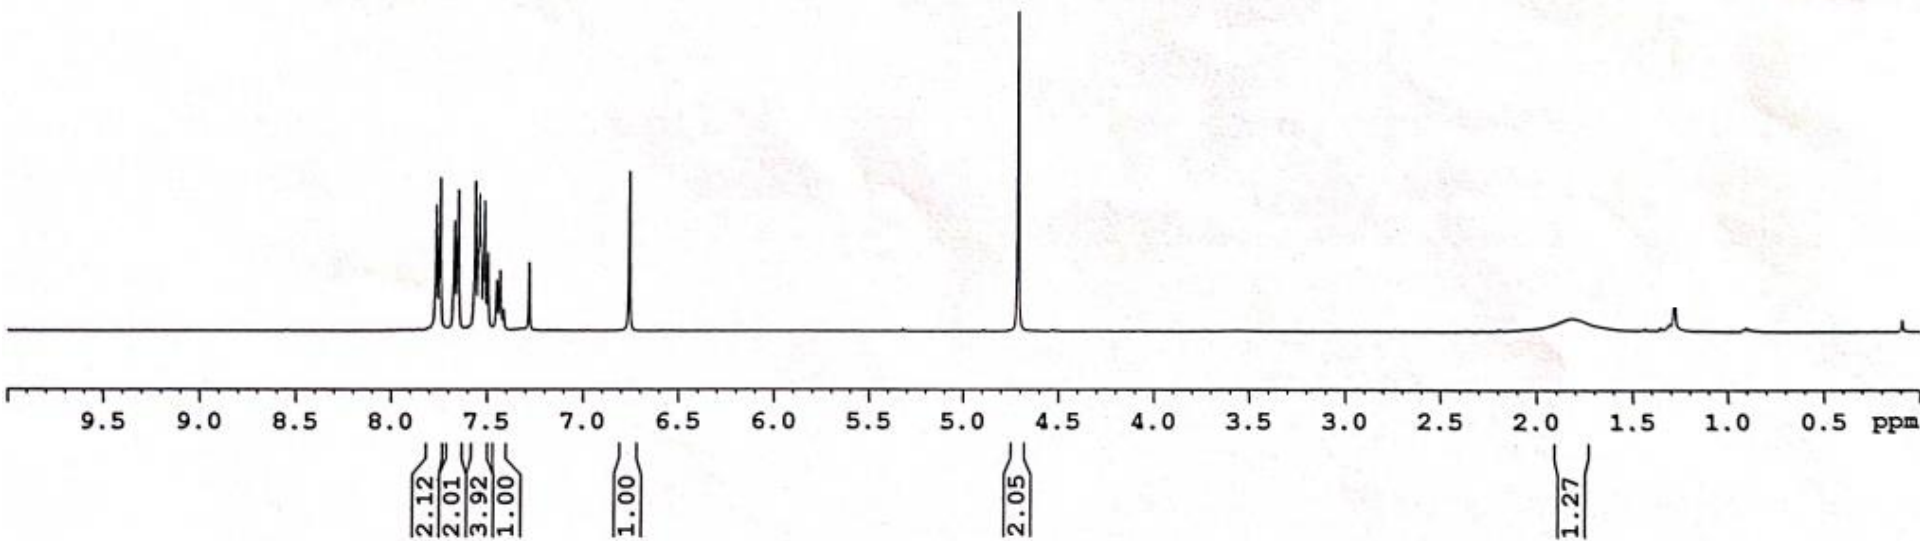

— 150.67  
— 143.48  
— 139.42  
— 131.93  
— 131.79  
— 129.33  
— 128.13  
— 127.31  
— 124.52  
— 121.96  
  
— 104.84  
  
— 77.35  
— 77.03  
— 76.71  
  
— 55.83

(3-(4-Bromophenyl)-1-phenyl-1*H*-pyrazol-5-yl)methanol (**3k**)

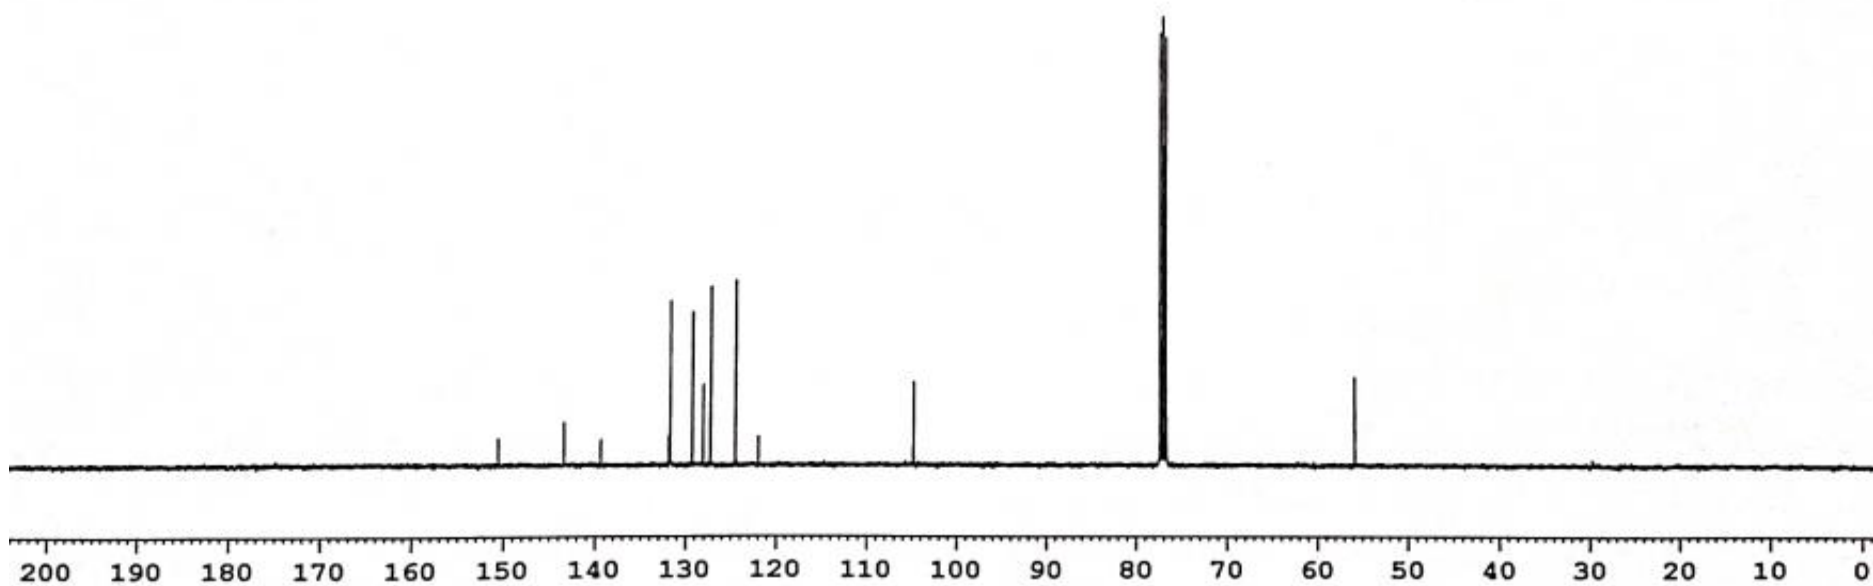

7.794  
7.775  
7.689  
7.669  
7.529  
7.510  
7.491  
7.434  
7.417  
7.399  
7.284  
7.257  
7.238  
6.757

— 4.712

— 2.405

— 1.926

(1-Phenyl-3-p-tolyl-1*H*-pyrazol-5-yl)methanol (**31**)

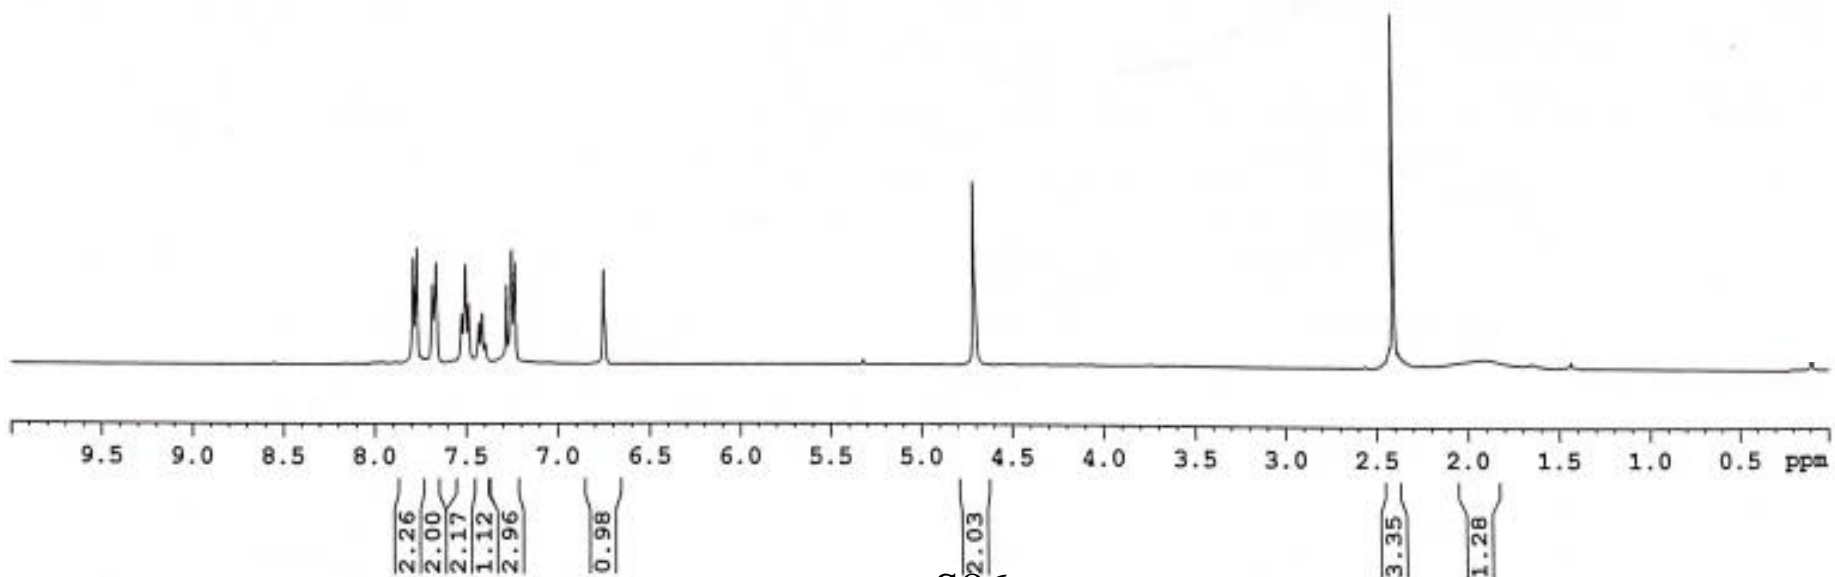

(1-Phenyl-3-p-tolyl-1*H*-pyrazol-5-yl)methanol (**31**)

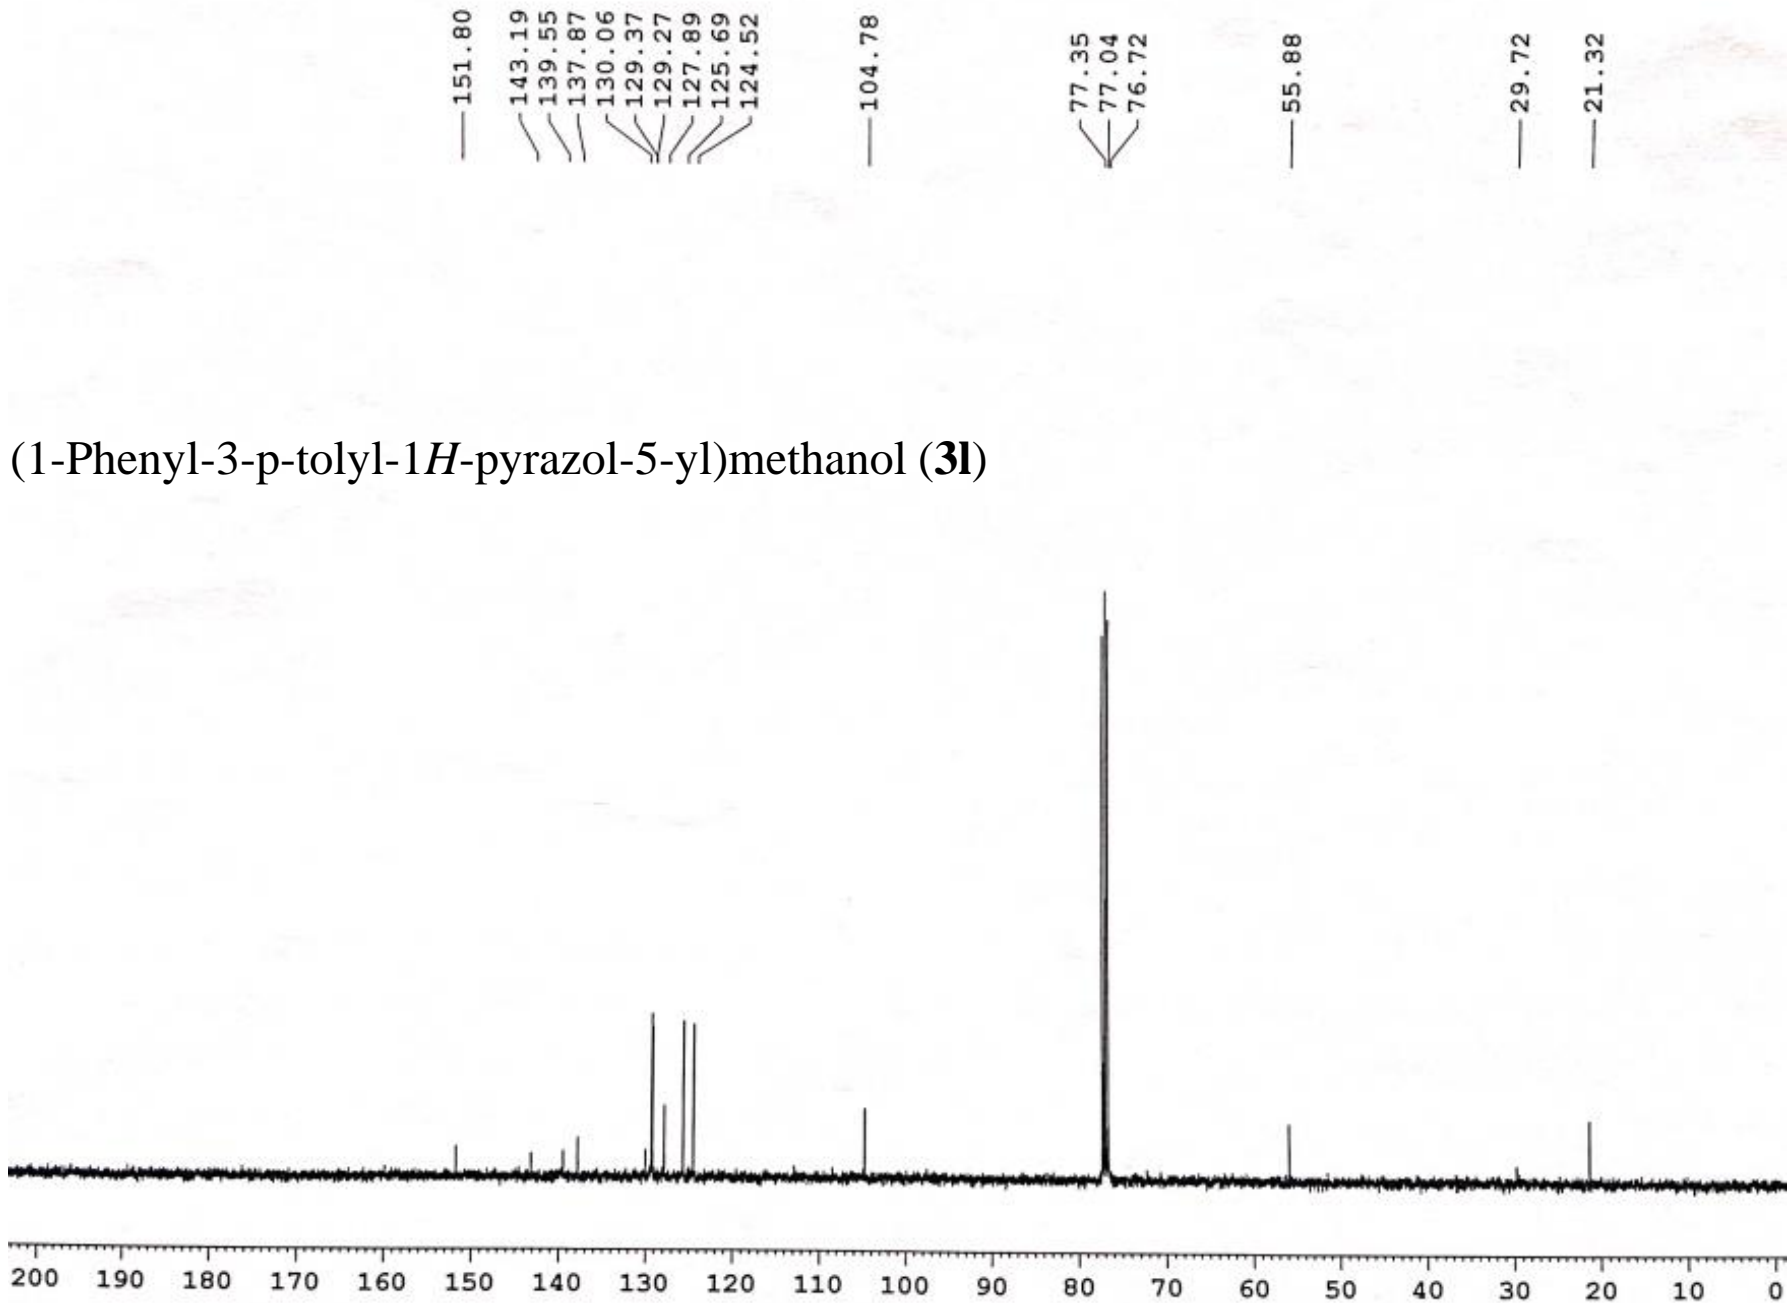

# 3-(3,4-Dimethoxyphenyl)-1-phenyl-1H-pyrazole (2d)

Cpd. 1: C17 H16 N2 O2

Compound Spectra (overlaid)

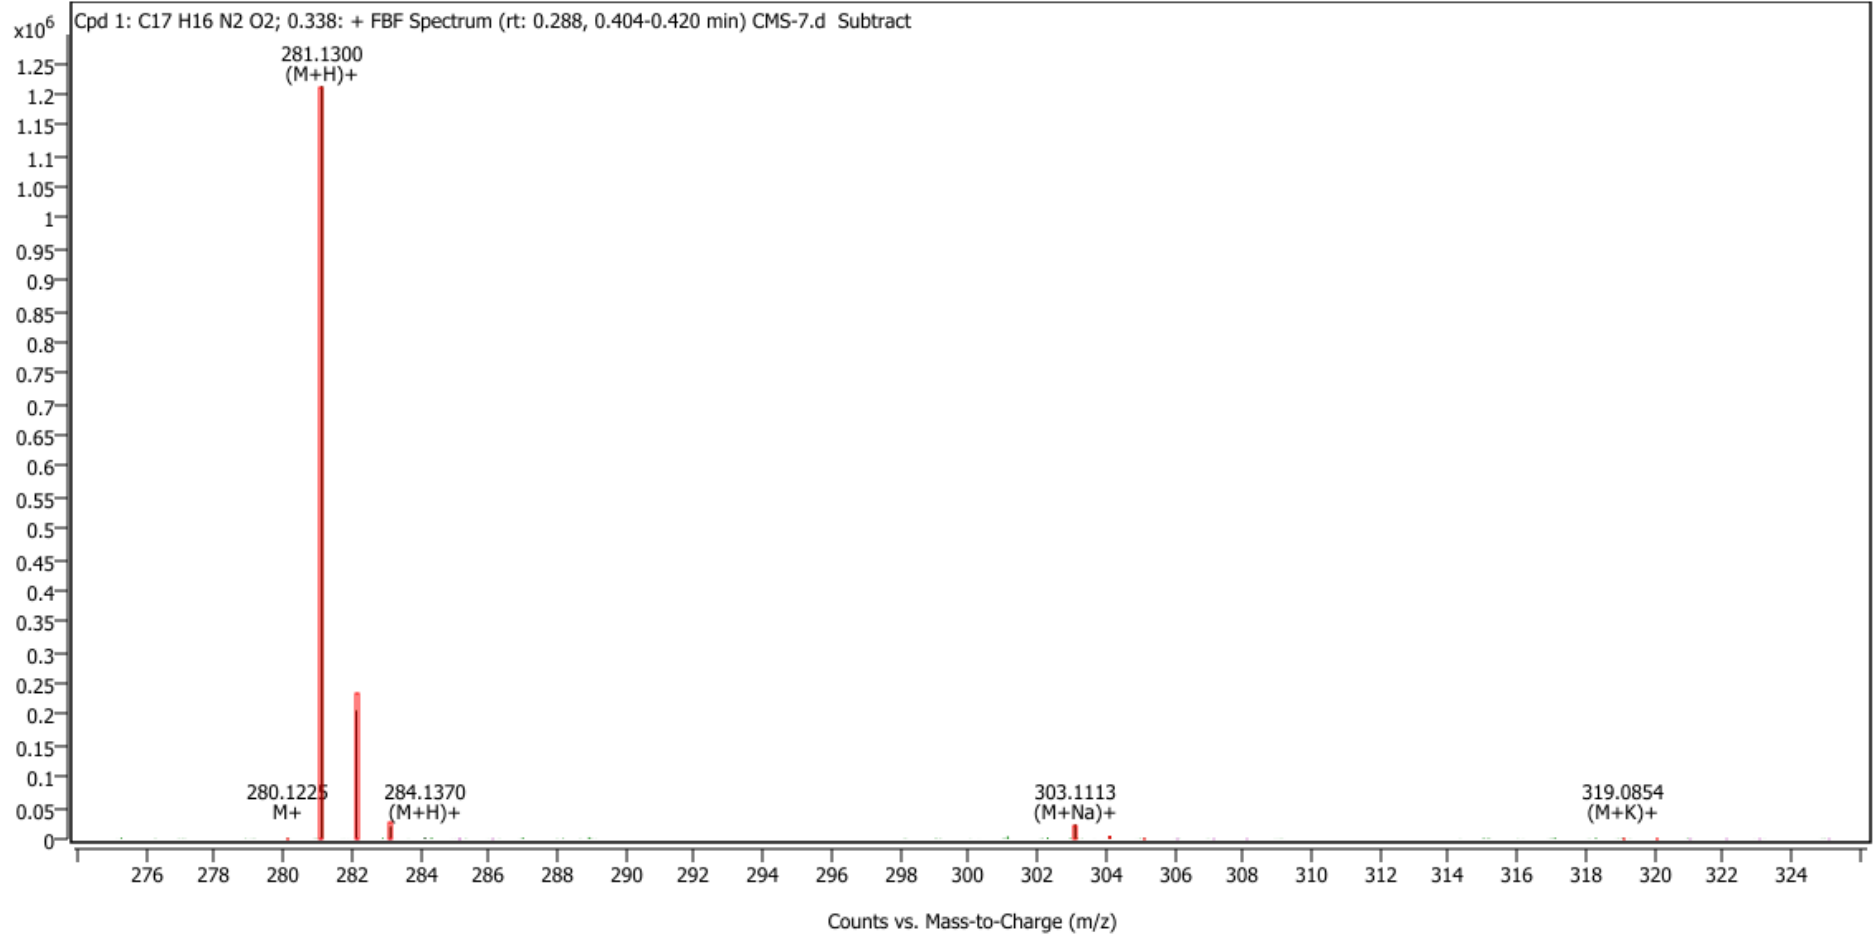



# 4-(1-phenyl-1*H*-pyrazol-3-yl)benzotrile (**2i**)

Cpd. 1: C16 H11 N3

Compound Spectra (overlaid)

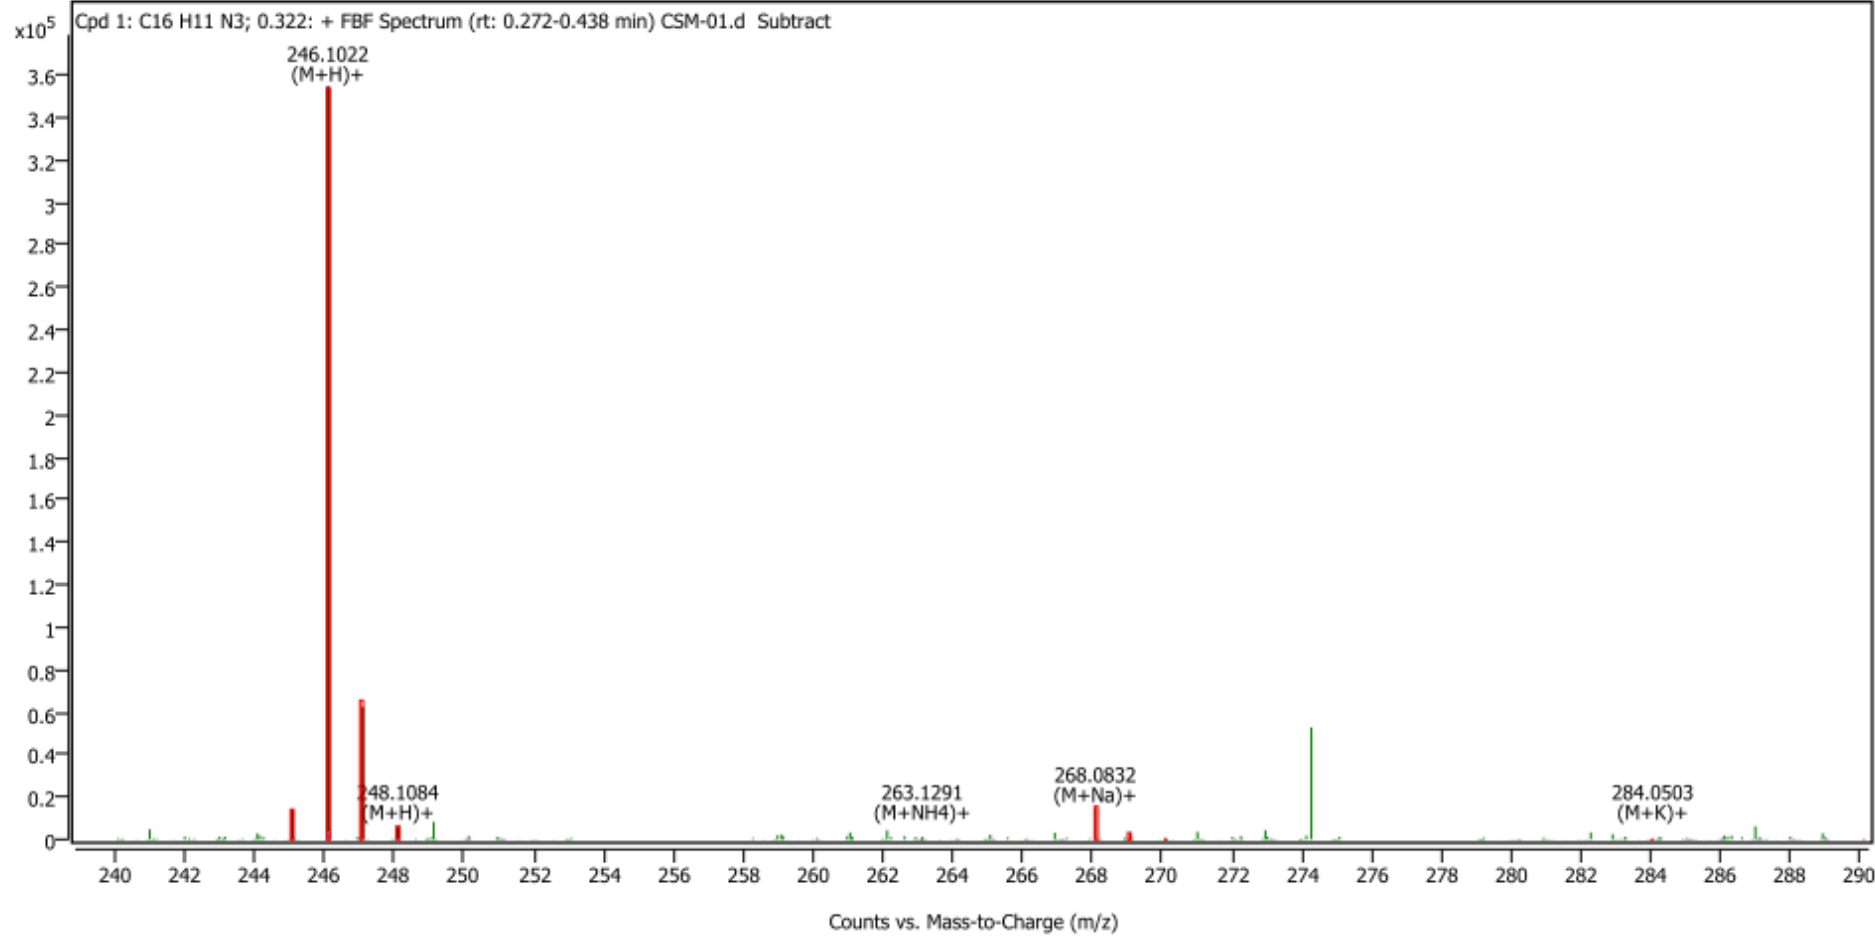

# 4-(1-p-tolyl-1H-pyrazol-3-yl)benzotrile (**2r**)

## Compound Details

Cpd. 1: C<sub>17</sub> H<sub>13</sub> N<sub>3</sub>

Compound Spectra (overlaid)

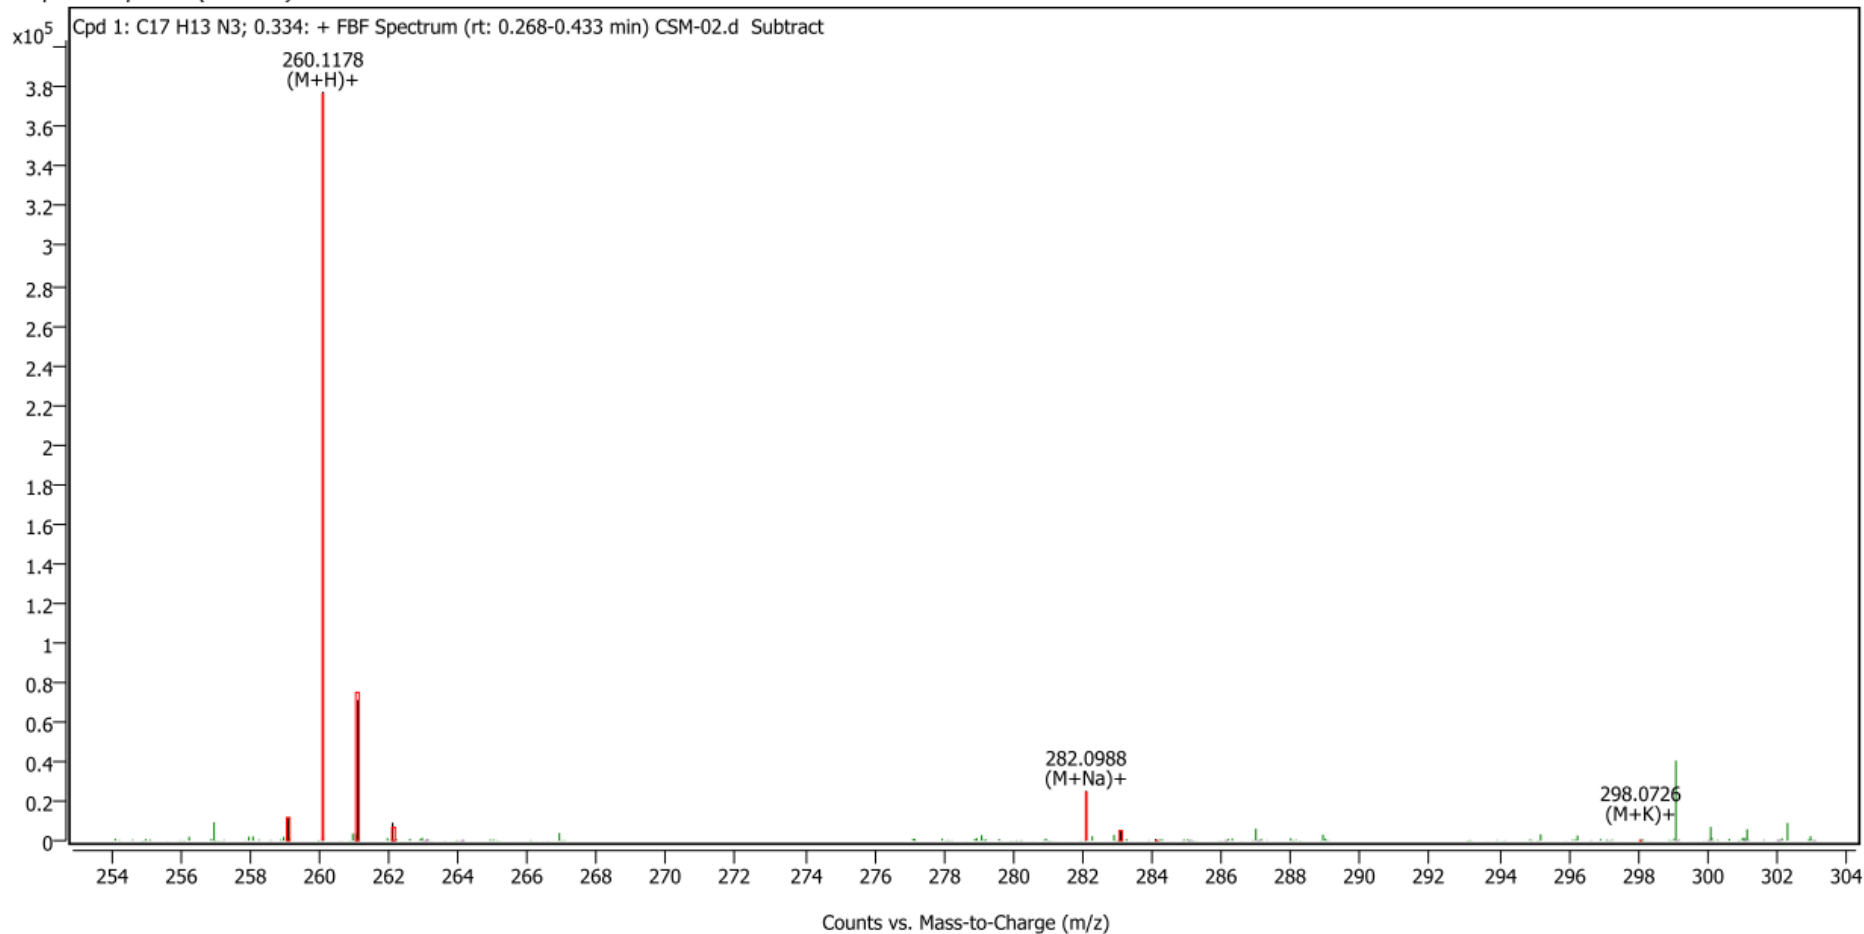

# 4-(1-(4-Chlorophenyl)-1H-pyrazol-3-yl)benzotrile (**2v**)

## Compound Details

**Cpd. 1: C<sub>16</sub> H<sub>10</sub> Cl N<sub>3</sub>**

Compound Spectra (overlaid)

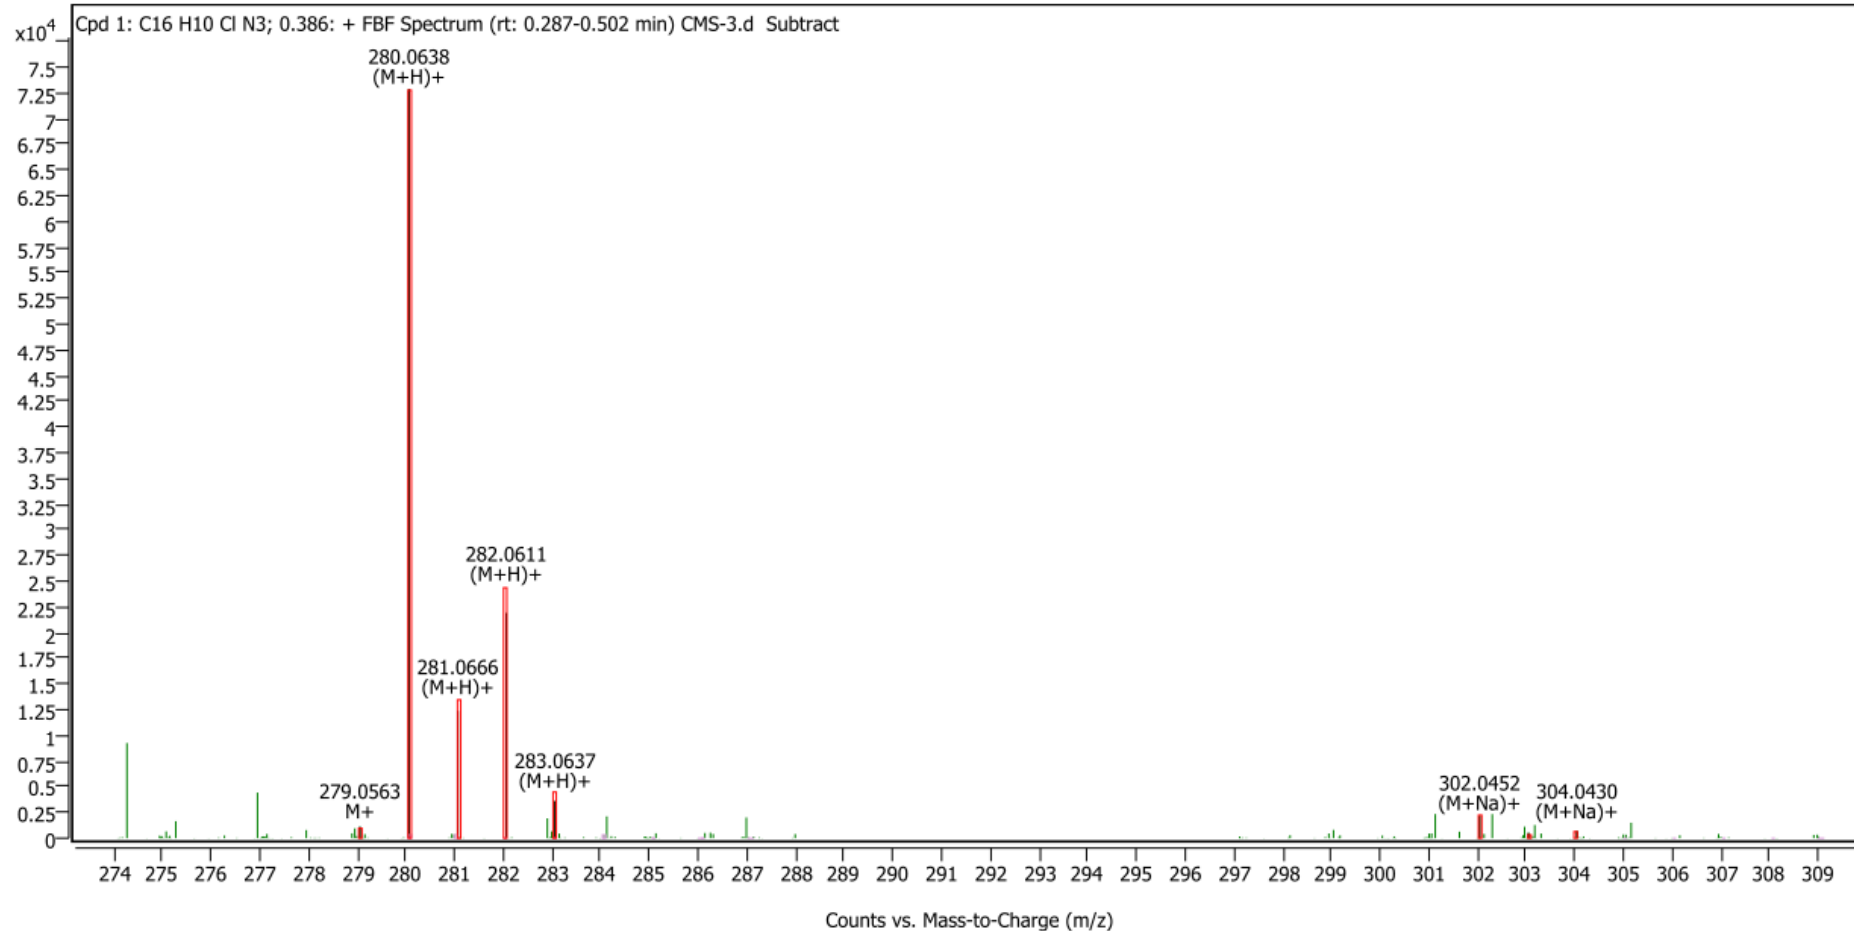

# 2-(5-Methyl-1-phenyl-1H-pyrazol-3-yl) phenol (**3c**)

**Cpd. 1: C16 H14 N2 O**

Compound Spectra (overlaid)

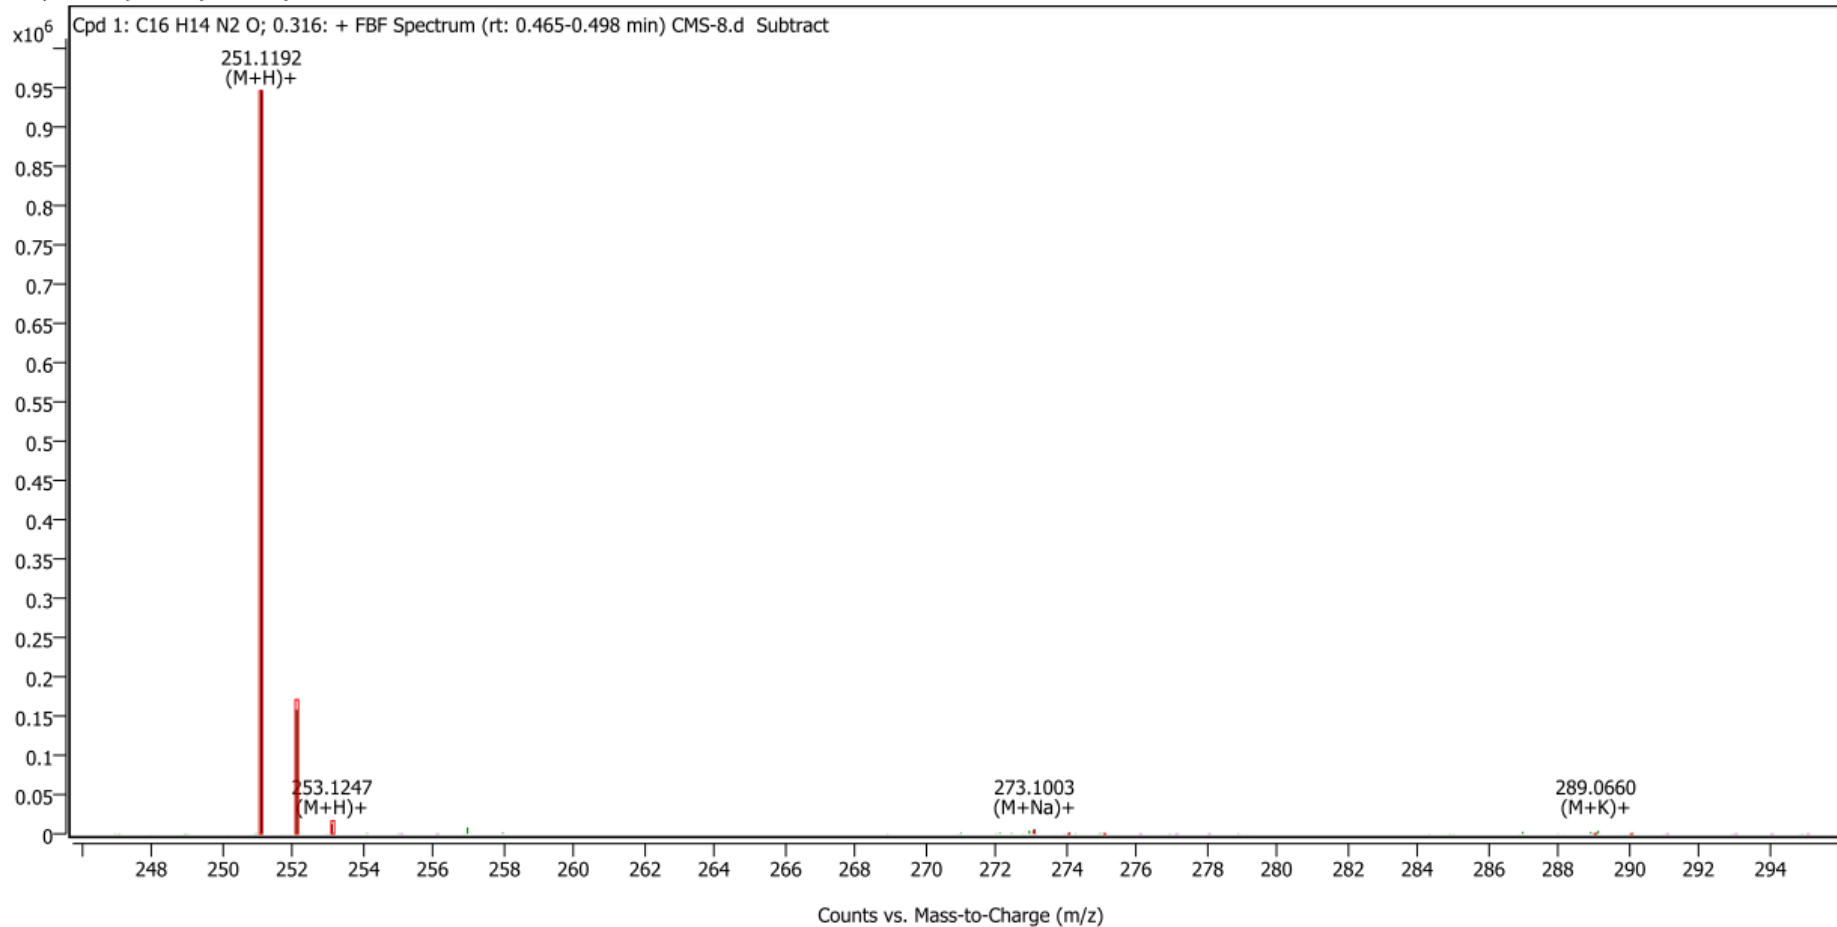

# 3-(4-Chlorophenyl)-5-methyl-1-p-tolyl-1H-pyrazole (**3f**)

## Compound Details

Cpd. 1: C17 H15 Cl N2

Compound Spectra (overlaid)

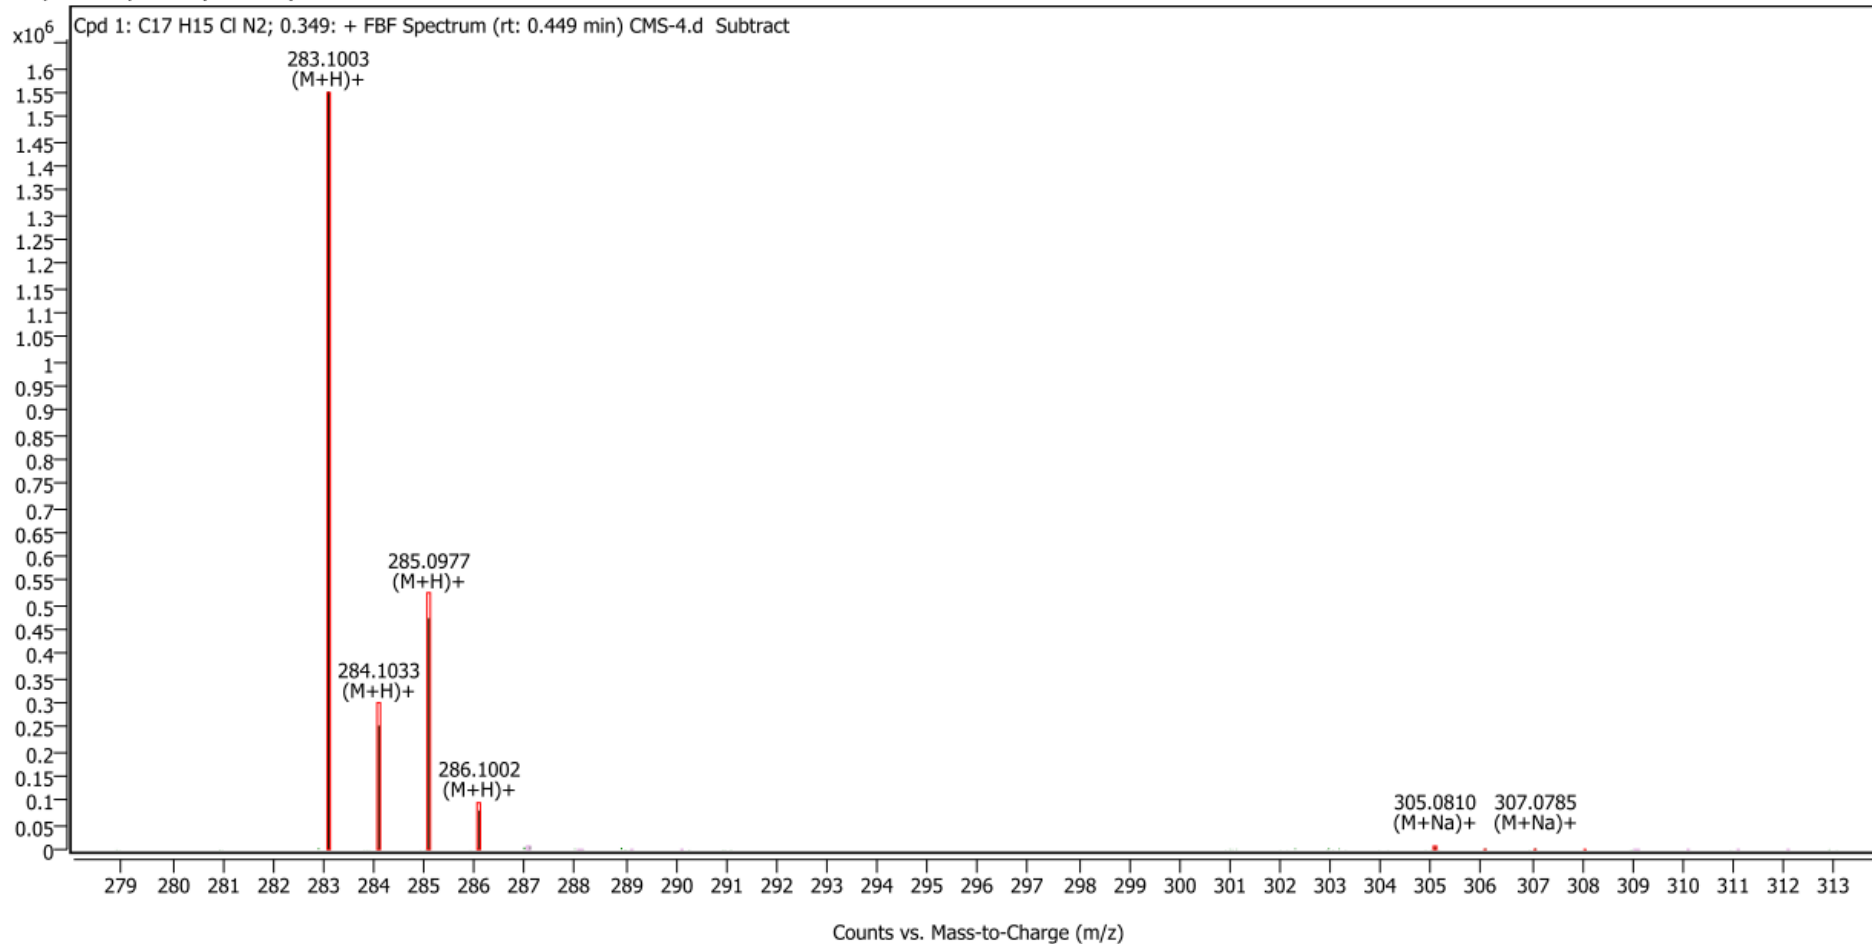

# 1-(4-Chlorophenyl)-5-methyl-3-phenyl-1*H*-pyrazole (**3g**)

## Compound Details

Cpd. 1: C<sub>16</sub> H<sub>13</sub> Cl N<sub>2</sub>

## Compound Spectra (overlaid)

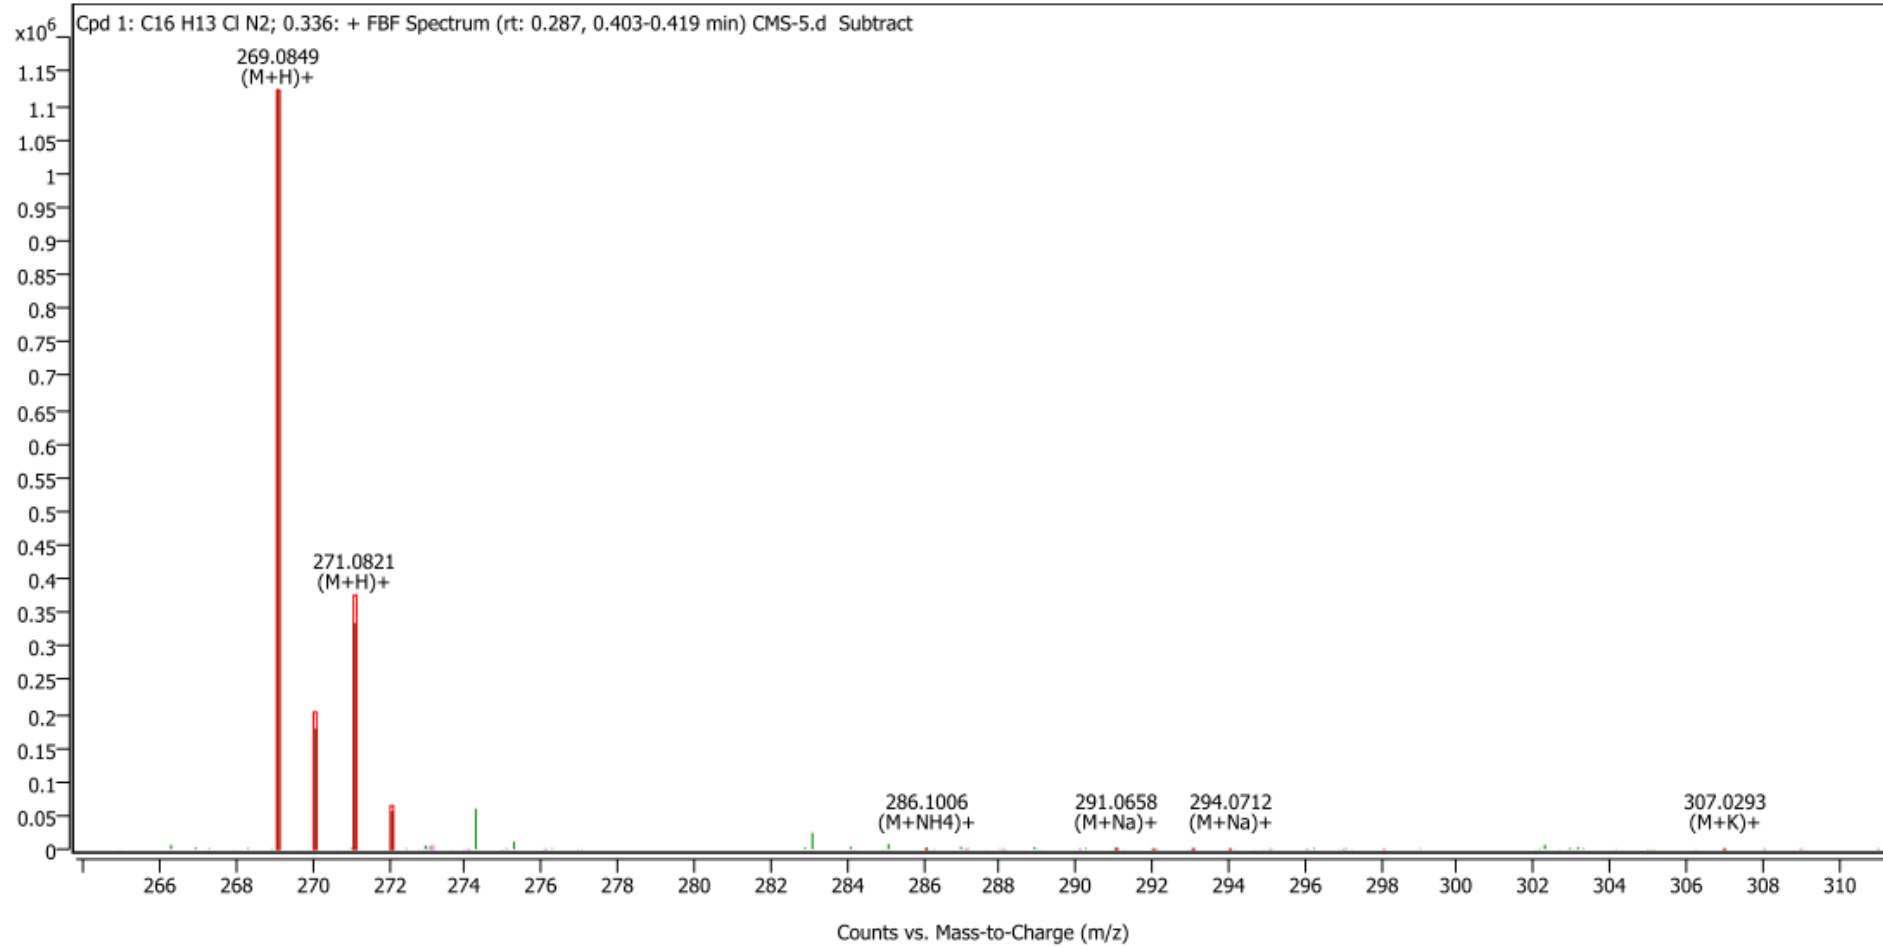

# (3-(4-Bromophenyl)-1-phenyl-1H-pyrazol-5-yl)methanol (**3k**)

## Compound Details

Cpd. 1: C<sub>16</sub> H<sub>13</sub> Br N<sub>2</sub> O

Compound Spectra (overlaid)

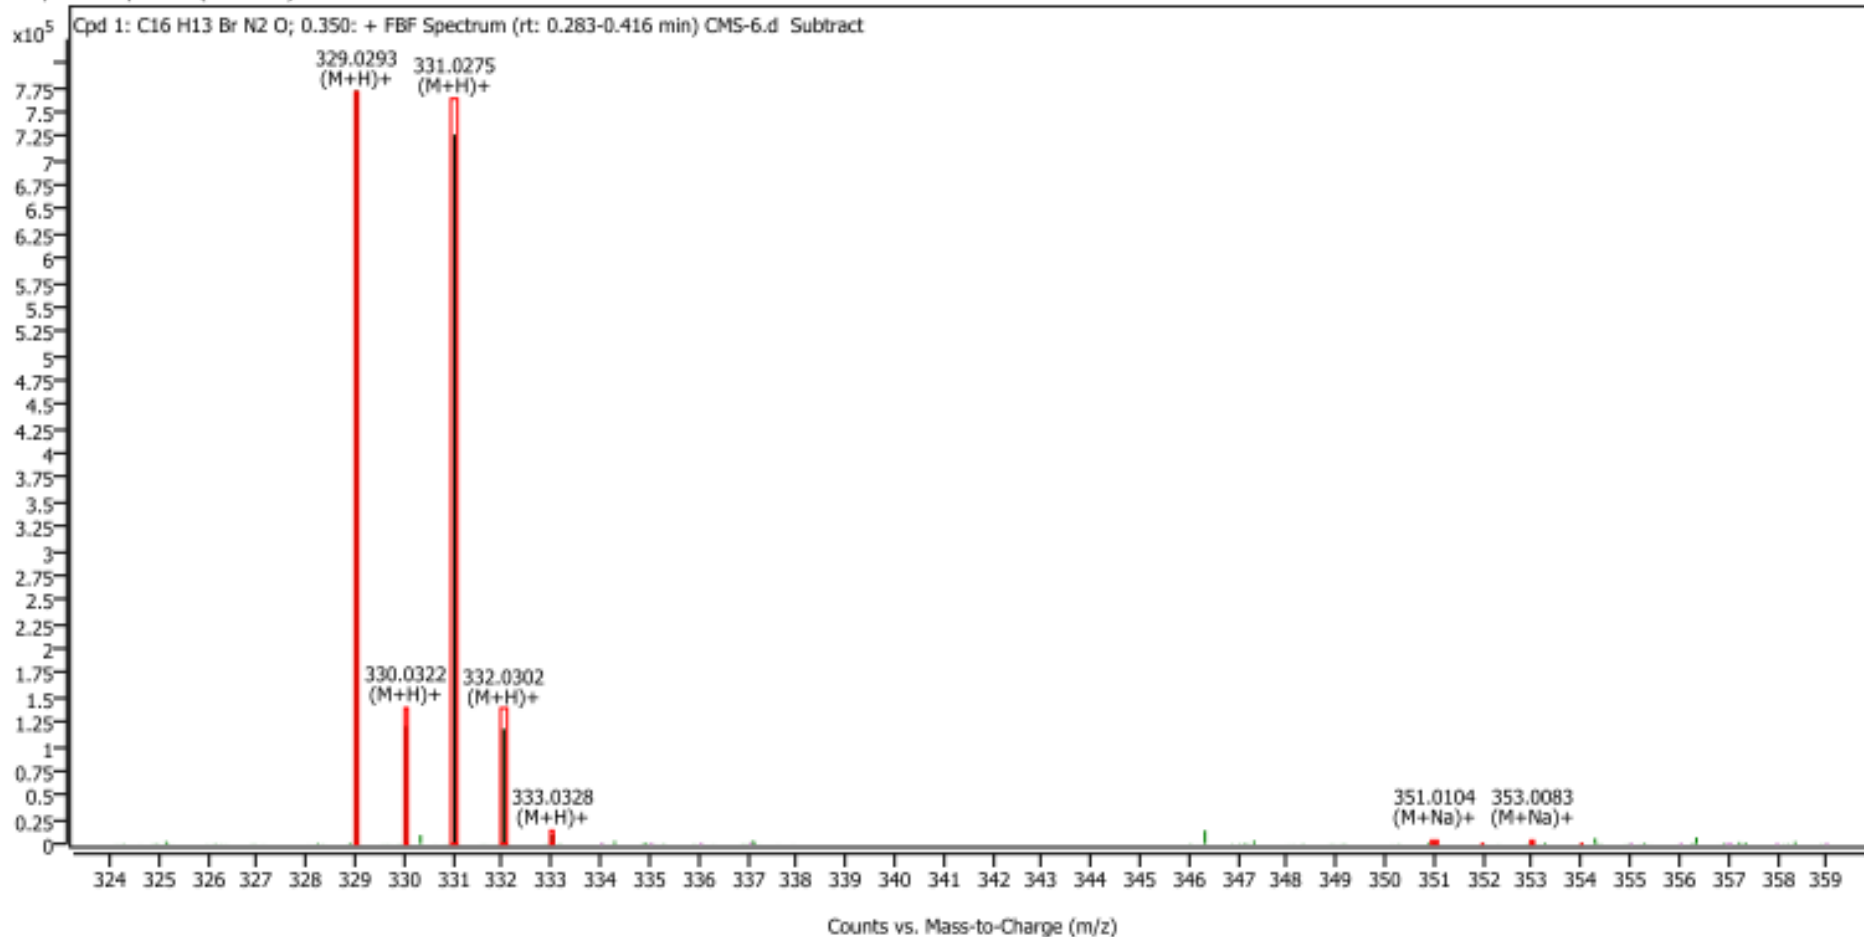

Supplement: d2ob01996e1.pdf [file d2ob01996e1.pdf]
